# Supplementary material for: A stereochemical model and origins of selectivity for the rhodium-catalyzed hydroselenation of styrene
Source: Royal Society of Chemistry journal article supplement (doi:10.1039/d4dt02869d), 2025-01-01
Supplement: d4dt02869d1.pdf [file d4dt02869d1.pdf]

*Supporting Information*

**Stereochemical model and origins of selectivity for rhodium-catalyzed  
hydroselelenation of styrene**

Chunhui Shan\*, Xi Luo, Xiaoling Luo and Rong Long\*

College of Chemistry, Chongqing Normal University, Chongqing 401331, P. R. China.

E-mail: [chunhui.shan@cqu.edu.cn](mailto:chunhui.shan@cqu.edu.cn); [longrong@cqu.edu.cn](mailto:longrong@cqu.edu.cn)

***Table of Content***

|                                                                                                                |           |
|----------------------------------------------------------------------------------------------------------------|-----------|
| <b>1. Complete reference for Gaussian 16.....</b>                                                              | <b>S2</b> |
| <b>2. Mechanistic study of another possible mechanism .....</b>                                                | <b>S2</b> |
| <b>3. DFT benchmark of different methods of energy difference between 16-ts-S and 10-ts-R.....</b>             | <b>S4</b> |
| <b>4. Regioselectivity of the olefin insertion step .....</b>                                                  | <b>S4</b> |
| <b>5. Free energy profiles for the [Rh(cod)Cl]<sub>2</sub> catalyzed selenol oxidative addition step .....</b> | <b>S5</b> |
| <b>6. Cartesian coordinates and energies of optimized structures .....</b>                                     | <b>S6</b> |

## 1. Complete reference for Gaussian 16

Gaussian 16, Revision A.03, M. J. Frisch, G. W. Trucks, H. B. Schlegel, G. E. Scuseria, M. A. Robb, J. R. Cheeseman, G. Scalmani, V. Barone, B. Mennucci, G. A. Petersson, H. Nakatsuji, M. Caricato, X. Li, H. P. Hratchian, A. F. Izmaylov, J. Bloino, G. Zheng, J. L. Sonnenberg, M. Hada, M. Ehara, K. Toyota, R. Fukuda, J. Hasegawa, M. Ishida, T. Nakajima, Y. Honda, O. Kitao, H. Nakai, T. Vreven, J. A. Montgomery, Jr., J. E. Peralta, F. Ogliaro, M. Bearpark, J. J. Heyd, E. Brothers, K. N. Kudin, V. N. Staroverov, T. Keith, R. Kobayashi, J. Normand, K. Raghavachari, A. Rendell, J. C. Burant, S. S. Iyengar, J. Tomasi, M. Cossi, N. Rega, J. M. Millam, M. Klene, J. E. Knox, J. B. Cross, V. Bakken, C. Adamo, J. Jaramillo, R. Gomperts, R. E. Stratmann, O. Yazyev, A. J. Austin, R. Cammi, C. Pomelli, J. W. Ochterski, R. L. Martin, K. Morokuma, V. G. Zakrzewski, G. A. Voth, P. Salvador, J. J. Dannenberg, S. Dapprich, A. D. Daniels, O. Farkas, J. B. Foresman, J. V. Ortiz, J. Cioslowski, and D. J. Fox, Gaussian, Inc., Wallingford CT, 2016.

## 2. Another possible mechanism

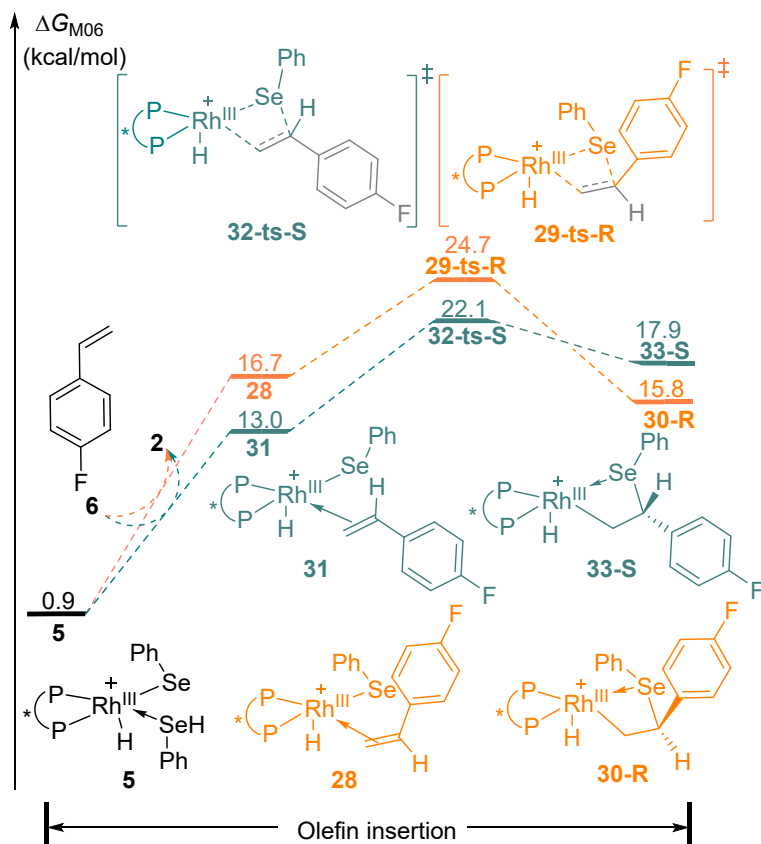

Fig. S1. Free-energy profiles of the of rhodium-catalyzed olefin insertion step. Values are given in kcal/mol.

When the five-coordinated Rh(III)-H species **5** is generated, there are other pathways to be considered. As shown in Figure S1, the ligand exchange of selenol with *para*-fluorostyrene **6** forms the alkene-coordinated intermediate **28** with an endergonic energy of 15.8 kcal/mol. Then unsaturated C-C double bond in intermediate **28** is inserted into the Rh-Se bond via transition state **29-ts** with an energy barrier of 8.0 kcal/mol to yield R-configuration alkyl Rh(III) **30**. The activation free energy of **29-ts** is 24.7 kcal/mol, which is 4.3 kcal/mol higher than that of **8-ts**, indicating that this pathway is unfavourable.

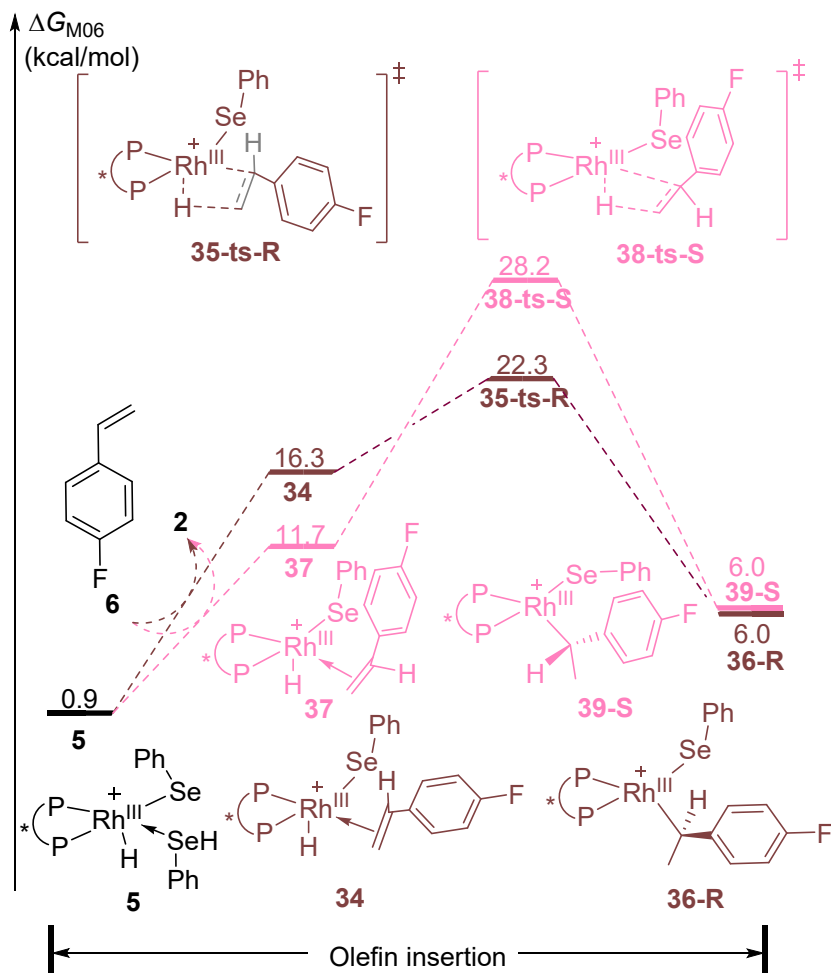

Fig. S2. Free-energy profiles of rhodium-catalyzed olefin insertion step. Values are given in kcal/mol.

When the five-coordinated Rh(III)-H species **5** is generated, there are other pathways to be considered. As shown in Figure S2, the ligand exchange of selenol with *para*-fluorostyrene **6** forms the alkene-coordinated intermediate **34** with an endergonic energy of 15.4 kcal/mol. Then unsaturated C-C double bond in intermediate **34** is inserted into the Rh-Se bond via transition state **35-ts** with an energy barrier of 6.0 kcal/mol to yield R-configuration alkyl Rh(III) **36**. The activation free energy of **35-ts** is 22.3 kcal/mol, which is 1.9 kcal/mol higher than that of **8-ts**, indicating that this pathway is unfavourable. Therefore, this pathway can also be excluded.

### 3. DFT benchmark of different methods of energy difference between 16-ts-S and 10-ts-R

Table S1. DFT benchmark of different methods of energy difference of 16-ts-S and 10-ts-R.

| Single-point calculations | $\Delta\Delta G^\ddagger_{16\text{-ts-S}-10\text{-ts-R}}$ |
|---------------------------|-----------------------------------------------------------|
| M06                       | 0.8                                                       |
| wB97XD                    | 0.8                                                       |
| B3LYP-D3                  | 0.4                                                       |
| M06L                      | 1.1                                                       |

To further confirm the reliability of our approach, we have performed additional calculations using different levels of theory, such as wB97XD, B3LYP-D3 and M06-L with the 6-311+G(d) and SDD basis sets. These calculations were carried out for solvation single-point energy calculations based on the gas-phase structures optimized using B3LYP-D3/6-31G(d)-LANL2DZ level of theory. The results are shown below. Computational results suggest that, in addition to the B3LYP-D3 calculated value, which is slightly smaller, the energy difference between 16-ts-S and 10-ts-R is in close agreement with the data obtained using M06. The enantioselectivity observed in the experiment is 92:8, meaning the energy difference between 16-ts-S and 10-ts-R is approximately 1.5 kcal/mol, which is in close agreement with the energy difference we calculated. Therefore, the energy difference between 16-ts-S and 10-ts-R, as presented in the manuscript, is reliable.

### 4. Regioselectivity of the olefin insertion step

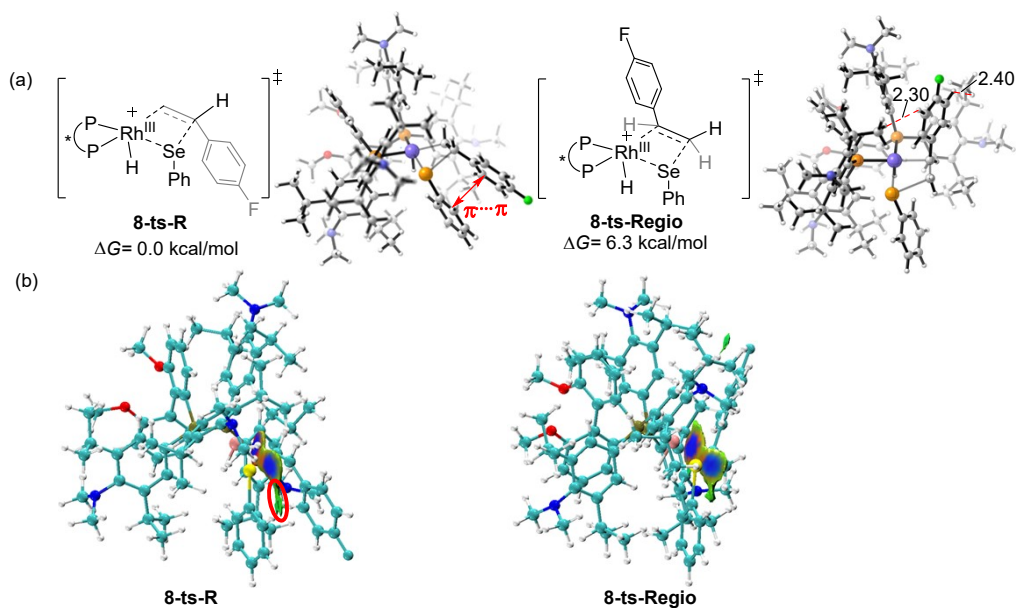

Fig. S3 (a) the structures of **8-ts-R** and **8-ts-Regio**; (b) IGMH analysis of **8-ts-R** and **8-ts-Regio**.

The olefin insertion step can produce two regioisomers, such as **8-ts-R** and **8-ts-regio**. The relative free energy of the transition state **8-ts-Regio** is 6.3 kcal/mol higher than that of **8-ts-R**. IGMH analysis indicated that there was a weak interaction between the fluorophenyl group of *para*-fluorostyrene and the phenyl group of selenol in transition state **8-ts-R**, thereby facilitating its stability and lowering the activation energy. Furthermore, the structural information of **8-ts-regio** shows that the distances between the hydrogen atoms of the isopropyl group and the phenyl group of selenol are 2.30 and 2.40 Å, respectively. This also indicates the presence of steric hindrance, but unfortunately, it is not displayed in the IGMH. Therefore, the  $\pi$ -stacking and steric effects may jointly influence the regioselectivity of the olefin insertion step.

### 5. Free energy profiles for the $[\text{Rh}(\text{cod})\text{Cl}]_2$ catalyzed selenol oxidative addition step

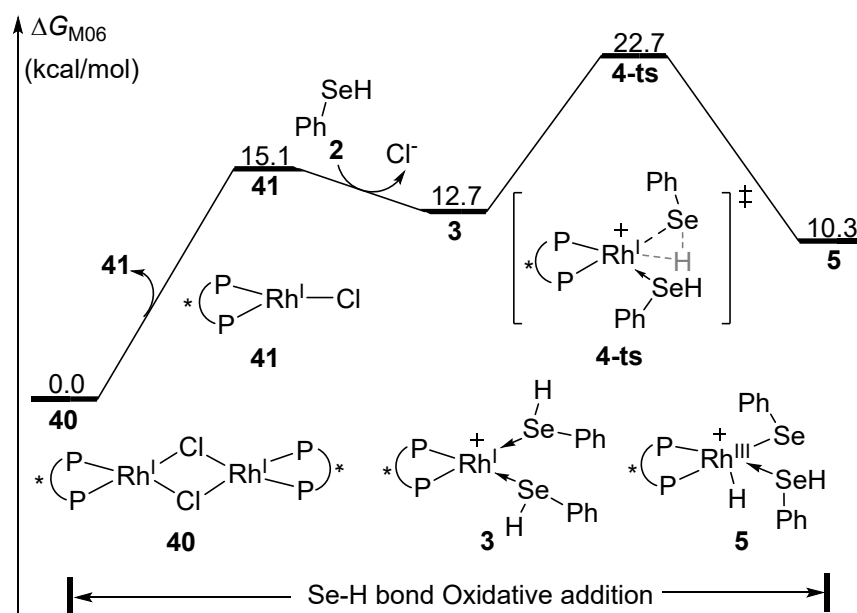

Fig. S4 Free energy profiles for the  $[\text{Rh}(\text{cod})\text{Cl}]_2$  catalyzed selenol oxidative addition step. Values are given in kcal/mol.

The free energy profiles for the  $[\text{Rh}(\text{cod})\text{Cl}]_2$  catalyzed selenol oxidative addition step are shown in Fig. S4. The calculated free energy profiles for the whole catalytic cycle start with the rhodium chloride dimer **40**, which is derived from complexation of  $[\text{Rh}(\text{cod})\text{Cl}]_2$ . Dissociation of rhodium chloride dimer gives rhodium monomer **41** with an endergonic energy of 15.1 kcal/mol. The ligand exchange of chloride ion with two molecules of selenols **2** yielded the selenols-coordinated intermediate **3**. Subsequently, the oxidative addition of selenol **2** occurs via a three-membered-ring transition state **4-ts** to generate five-coordinated Rh(III)-H species **5** with an activation energy of 22.7 kcal/mol. The relative free energy of the Rh(III)-H species **5** is 10.3 kcal/mol, which is 9.4 kcal/mol higher than that of the same intermediate

in the corresponding step in Fig. 1 of the article, resulting in a higher activation energy for the subsequent reductive elimination step. Therefore,  $[\text{Rh}(\text{cod})\text{Cl}]_2$  is not favorable for the hydroselenation reaction as a catalyst, which is consistent with the experimental observations.

## 6. Cartesian coordinates and energies of optimized structures

|                                               |             |             |             |   |             |             |             |
|-----------------------------------------------|-------------|-------------|-------------|---|-------------|-------------|-------------|
| <b>1</b>                                      |             |             |             | H | 0.96970700  | -2.42724700 | -0.92576700 |
| B3LYP-D3 SCF energy: -4201.535106 a.u.        |             |             |             | H | 3.52317000  | -0.60420300 | 1.97263000  |
| B3LYP-D3 enthalpy: -4199.678770 a.u.          |             |             |             | H | 4.40001800  | -0.59150100 | -0.56154200 |
| B3LYP-D3 free energy: -4199.914019 a.u.       |             |             |             | H | 2.06486400  | 2.96774200  | -1.10440800 |
| M06 SCF energy in solution: -4200.530173 a.u. |             |             |             | H | -1.02179400 | 2.33575400  | -0.83539300 |
|                                               |             |             |             | H | -3.30379600 | 0.65742000  | 2.37117500  |
| Cartesian coordinates                         |             |             |             | H | -4.33351400 | 0.88233200  | -0.41186200 |
| ATOM                                          | X           | Y           | Z           | H | -2.52331000 | -2.98701300 | -0.81240200 |
| C                                             | 0.02211000  | 1.30282600  | 3.61520200  | N | -6.80324600 | -2.54196700 | -2.33650800 |
| C                                             | 0.36523200  | 0.55225200  | 2.46580400  | C | -7.98245300 | -2.71764900 | -1.50196700 |
| C                                             | 1.22675000  | 1.13642500  | 1.51449600  | H | -7.67896400 | -3.10823300 | -0.52559900 |
| C                                             | 1.75081600  | 2.41781500  | 1.75030500  | H | -8.57075400 | -1.79859600 | -1.33233400 |
| C                                             | 1.40253700  | 3.13302700  | 2.89180100  | H | -8.64611600 | -3.45464400 | -1.97033200 |
| C                                             | 0.52736000  | 2.58698000  | 3.82459100  | C | -7.04723700 | -2.19377200 | -3.72785500 |
| C                                             | -0.16806400 | -0.84824500 | 2.43083800  | H | -6.10409900 | -2.23722600 | -4.28240600 |
| C                                             | -1.20134500 | -1.29212400 | 1.57946100  | H | -7.73294700 | -2.92791500 | -4.16802000 |
| C                                             | 0.30081300  | -1.72568700 | 3.44086800  | H | -7.48556200 | -1.19156700 | -3.88136300 |
| C                                             | -1.79360900 | -2.54605400 | 1.80700200  | N | -3.03936500 | 5.28359700  | 2.03072800  |
| C                                             | -0.25468500 | -2.99543600 | 3.61208400  | N | 6.40466700  | 3.08982900  | -2.54300900 |
| C                                             | -1.32283700 | -3.38435800 | 2.81025000  | N | 3.39208500  | -5.18105500 | 1.93392500  |
| P                                             | 1.61020000  | 0.25559800  | -0.06902000 | C | -2.56357000 | 5.68148200  | 3.34683100  |
| P                                             | -1.68519600 | -0.29761100 | 0.09149200  | H | -2.36811700 | 6.76178500  | 3.34771600  |
| C                                             | 2.20359600  | -1.38616800 | 0.47421900  | H | -3.26245700 | 5.47103400  | 4.17439500  |
| C                                             | 1.69387000  | -2.53604000 | -0.12347900 | H | -1.62252000 | 5.16485700  | 3.55960200  |
| C                                             | 3.13618300  | -1.50466000 | 1.51095100  | C | -4.29321300 | 5.88790100  | 1.60782600  |
| C                                             | 2.05037700  | -3.81203800 | 0.32681700  | H | -4.47968800 | 5.64633100  | 0.55635300  |
| C                                             | 3.55656900  | -2.75618000 | 1.96076600  | H | -5.17159000 | 5.55881800  | 2.19203400  |
| C                                             | 2.98973700  | -3.92217700 | 1.37654000  | H | -4.22042700 | 6.97856000  | 1.69928100  |
| C                                             | 3.09590400  | 1.10633100  | -0.74162500 | C | 6.74748300  | 2.72547200  | -3.90915200 |
| C                                             | 4.30860100  | 0.43316800  | -0.90156800 | H | 7.34400900  | 3.52948700  | -4.35685100 |
| C                                             | 3.00258000  | 2.42673700  | -1.20509000 | H | 7.32322000  | 1.78764200  | -4.00505000 |
| C                                             | 5.42124200  | 1.04768800  | -1.49108600 | H | 5.82958000  | 2.61829900  | -4.49636900 |
| C                                             | 4.08844700  | 3.07853800  | -1.79379700 | C | 7.51333600  | 3.47360400  | -1.68197200 |
| C                                             | 5.31568800  | 2.38370300  | -1.93678100 | H | 8.22717600  | 2.66180700  | -1.45722800 |
| C                                             | -2.11922800 | 1.36339400  | 0.72198400  | H | 8.07395300  | 4.28600500  | -2.16021300 |
| C                                             | -1.65681100 | 2.48801900  | 0.03218600  | H | 7.11959900  | 3.84862800  | -0.73200600 |
| C                                             | -2.94320900 | 1.53125900  | 1.83630100  | C | 2.48030000  | -5.75521500 | 2.91021000  |
| C                                             | -1.96805200 | 3.77886800  | 0.46013700  | H | 1.57663700  | -6.21369700 | 2.46786800  |
| C                                             | -3.31722900 | 2.80918000  | 2.27075200  | H | 3.00271500  | -6.52880200 | 3.48597800  |
| C                                             | -2.79143300 | 3.93914900  | 1.60164300  | H | 2.14978100  | -4.97531500 | 3.60402000  |
| C                                             | -3.28371200 | -0.99130900 | -0.50276900 | C | 4.07958500  | -6.14754400 | 1.08980000  |
| C                                             | -4.38607600 | -0.15768500 | -0.71252700 | H | 4.71702600  | -5.61880700 | 0.37563500  |
| C                                             | -3.37339400 | -2.32314100 | -0.93021800 | H | 4.72432200  | -6.77680500 | 1.71707900  |
| C                                             | -5.55696300 | -0.62377500 | -1.32524200 | H | 3.41537700  | -6.81915300 | 0.52038900  |
| C                                             | -4.53259000 | -2.83688900 | -1.51387400 | C | -6.67932100 | 0.37845500  | -1.57401300 |
| C                                             | -5.64002700 | -1.97876400 | -1.71868900 | H | -7.52023500 | -0.14833500 | -2.02593000 |
| H                                             | 2.45387400  | 2.85983900  | 1.05886100  | C | -6.23025000 | 1.46211600  | -2.57425800 |
| H                                             | 1.81657800  | 4.12410200  | 3.05232500  | H | -5.39898900 | 2.05421800  | -2.17243800 |
| H                                             | -2.64016400 | -2.86978300 | 1.22096900  | H | -5.89995600 | 1.01425000  | -3.51841200 |
| H                                             | -1.79229500 | -4.35105800 | 2.96915200  | H | -7.05564200 | 2.14944300  | -2.79227200 |

|   |             |             |             |    |             |             |             |
|---|-------------|-------------|-------------|----|-------------|-------------|-------------|
| C | -7.18419800 | 1.00884300  | -0.26372600 | H  | -0.36816000 | 5.76484100  | 1.52444300  |
| H | -8.02803300 | 1.67924200  | -0.46247000 | C  | -1.04819800 | 4.73670400  | -1.72971100 |
| H | -7.51502800 | 0.24140200  | 0.44453100  | H  | -0.20502900 | 4.04333400  | -1.83902000 |
| H | -6.39906800 | 1.59702900  | 0.22365500  | H  | -1.90250400 | 4.31715000  | -2.27394400 |
| C | -4.55723600 | -4.30005200 | -1.93300200 | H  | -0.75776200 | 5.67326700  | -2.21758400 |
| H | -5.55539100 | -4.49364700 | -2.33443700 | C  | 4.62307000  | -2.86845700 | 3.04846500  |
| C | -3.53155700 | -4.58072000 | -3.04805300 | H  | 4.29353200  | -3.64196700 | 3.75236300  |
| H | -2.50240500 | -4.44286700 | -2.69223800 | C  | 4.84744500  | -1.56594000 | 3.83369400  |
| H | -3.62106100 | -5.61506500 | -3.39914900 | H  | 5.35773400  | -0.81254500 | 3.22070500  |
| H | -3.68389200 | -3.91518600 | -3.90544600 | H  | 3.90947200  | -1.12771000 | 4.18481900  |
| C | -4.33143400 | -5.23586800 | -0.73114100 | H  | 5.48734500  | -1.76179200 | 4.70076400  |
| H | -3.33108600 | -5.10419600 | -0.29855300 | C  | 5.96531100  | -3.33895700 | 2.45020300  |
| H | -5.06721200 | -5.05030300 | 0.05927400  | H  | 6.32866600  | -2.61652300 | 1.70928500  |
| H | -4.42077900 | -6.28359000 | -1.04022900 | H  | 6.72444000  | -3.42288600 | 3.23661900  |
| C | 3.92191500  | 4.51336000  | -2.27408200 | H  | 5.86964100  | -4.31187600 | 1.96546300  |
| H | 4.87951600  | 4.80821800  | -2.71072200 | C  | 1.42064400  | -5.02174100 | -0.35854000 |
| C | 3.61780400  | 5.46533100  | -1.10284000 | H  | 1.59272000  | -5.89948300 | 0.26713700  |
| H | 2.65861700  | 5.22714600  | -0.62773200 | C  | -0.10558800 | -4.89000500 | -0.52227100 |
| H | 4.39758100  | 5.40916000  | -0.33501600 | H  | -0.37213500 | -4.08831400 | -1.22166700 |
| H | 3.56259000  | 6.50161900  | -1.45577200 | H  | -0.52351000 | -5.82075500 | -0.92216000 |
| C | 2.84396300  | 4.62049000  | -3.36892500 | H  | -0.58942000 | -4.67078800 | 0.43357900  |
| H | 2.79666000  | 5.64321500  | -3.75992500 | C  | 2.08867700  | -5.27266700 | -1.72510800 |
| H | 3.05897500  | 3.94582600  | -4.20564600 | H  | 1.94026900  | -4.41099700 | -2.38796200 |
| H | 1.84760400  | 4.37206200  | -2.98288400 | H  | 3.16689000  | -5.42979800 | -1.62261100 |
| C | 6.70438400  | 0.23171800  | -1.60806800 | H  | 1.65805800  | -6.15417500 | -2.21404000 |
| H | 7.45043000  | 0.83142600  | -2.13057100 | Rh | -0.09905900 | -0.07868000 | -1.68020400 |
| C | 7.27375500  | -0.09867200 | -0.21482900 | C  | -1.14671600 | -1.45275500 | -3.14309900 |
| H | 6.57220900  | -0.71088300 | 0.36416100  | H  | -1.69476600 | -2.12124300 | -2.49110800 |
| H | 8.21175300  | -0.65825600 | -0.30478300 | C  | -1.71202500 | -0.20978300 | -3.36712900 |
| H | 7.47249400  | 0.81383300  | 0.35787900  | H  | -2.63519000 | 0.01391100  | -2.83862400 |
| C | 6.48918800  | -1.04746900 | -2.43924500 | C  | -1.37066400 | 0.70479300  | -4.52942200 |
| H | 5.78402500  | -1.73174600 | -1.95270400 | H  | -2.26179800 | 1.28056800  | -4.80125600 |
| H | 6.09654600  | -0.80959400 | -3.43429600 | H  | -1.11805100 | 0.10400400  | -5.40837600 |
| H | 7.43682400  | -1.58327100 | -2.56480300 | C  | -0.22839200 | 1.68650900  | -4.19816200 |
| H | 0.24874000  | 3.14726200  | 4.70986700  | H  | 0.20111500  | 2.09958000  | -5.12397900 |
| H | 0.11217800  | -3.66425300 | 4.38028800  | H  | -0.64381100 | 2.53944400  | -3.65106500 |
| O | 1.29659100  | -1.24248500 | 4.23558700  | C  | 0.87866000  | 1.10431100  | -3.34847800 |
| O | -0.82628700 | 0.69863600  | 4.49634400  | H  | 1.45602900  | 1.85060800  | -2.81529800 |
| C | 1.65676700  | -1.98458200 | 5.39454300  | C  | 1.43881100  | -0.15966400 | -3.42994000 |
| H | 2.14685700  | -2.93026200 | 5.12999200  | H  | 2.38986900  | -0.30607300 | -2.92283600 |
| H | 2.36455200  | -1.35983400 | 5.94081500  | C  | 1.05999600  | -1.22262500 | -4.44686800 |
| H | 0.78268300  | -2.18595200 | 6.02653600  | H  | 1.94085000  | -1.83685700 | -4.66181200 |
| C | -0.67008300 | 0.99909600  | 5.88030200  | H  | 0.78739600  | -0.74328900 | -5.39199700 |
| H | -1.07449500 | 1.98493700  | 6.13609500  | C  | -0.07916000 | -2.14352500 | -3.96155200 |
| H | -1.23953400 | 0.23738100  | 6.41667600  | H  | -0.54743400 | -2.65354200 | -4.81751400 |
| H | 0.38616500  | 0.94742800  | 6.17027500  | H  | 0.34799300  | -2.93635200 | -3.33744500 |
| C | -4.27936300 | 2.93178600  | 3.44889200  |    |             |             |             |
| H | -4.56559300 | 3.98005600  | 3.54787600  |    |             |             |             |
| C | -5.58009900 | 2.14259000  | 3.21134100  |    |             |             |             |
| H | -5.39642200 | 1.06639200  | 3.11710500  |    |             |             |             |
| H | -6.26907500 | 2.28837300  | 4.05106100  |    |             |             |             |
| H | -6.08258800 | 2.47864300  | 2.29848800  |    |             |             |             |
| C | -3.60526300 | 2.50545200  | 4.76450000  |    |             |             |             |
| H | -3.27062200 | 1.46470200  | 4.71404500  |    |             |             |             |
| H | -2.72625600 | 3.12659800  | 4.96717700  |    |             |             |             |
| H | -4.29974200 | 2.60863600  | 5.60623300  |    |             |             |             |
| C | -1.38162500 | 4.99327200  | -0.25222600 |    |             |             |             |
| H | -2.12539700 | 5.79476000  | -0.20909500 |    |             |             |             |
| C | -0.12845500 | 5.49137300  | 0.49365300  |    |             |             |             |
| H | 0.63420900  | 4.70532300  | 0.52230400  |    |             |             |             |
| H | 0.29764800  | 6.36902800  | -0.00656800 |    |             |             |             |

## 2

B3LYP-D3 SCF energy: -241.459530 a.u.

B3LYP-D3 enthalpy: -241.354246 a.u.

B3LYP-D3 free energy: -241.394161 a.u.

M06 SCF energy in solution: -241.427090 a.u.

Cartesian coordinates

| ATOM | X           | Y           | Z          |
|------|-------------|-------------|------------|
| C    | -0.12893700 | 0.00001200  | 0.00951700 |
| C    | -0.82573500 | 1.21208000  | 0.00219100 |
| C    | -2.22274400 | 1.20864400  | 0.00080700 |
| C    | -2.92204700 | -0.00002800 | 0.00248600 |
| C    | -2.22274000 | -1.20864200 | 0.00094700 |
| C    | -0.82568200 | -1.21203600 | 0.00244700 |

|    |             |             |             |
|----|-------------|-------------|-------------|
| H  | -0.28014200 | 2.15030200  | -0.00335000 |
| H  | -2.76250600 | 2.15188000  | -0.00248100 |
| H  | -4.00868800 | -0.00000300 | -0.00034200 |
| H  | -2.76242300 | -2.15192300 | -0.00217800 |
| H  | -0.28010900 | -2.15027100 | -0.00271700 |
| Se | 1.85135800  | -0.00010100 | -0.04540400 |
| H  | 2.03499800  | 0.00327500  | 1.44442900  |

### 3

B3LYP-D3 SCF energy: -4372.437014 a.u.

B3LYP-D3 enthalpy: -4370.557251 a.u.

B3LYP-D3 free energy: -4370.810935 a.u.

M06 SCF energy in solution: -4371.557048 a.u.

#### Cartesian coordinates

| ATOM | X           | Y           | Z           |
|------|-------------|-------------|-------------|
| C    | -0.29928200 | 4.38590200  | -1.07873600 |
| C    | 0.18542000  | 3.23117800  | -0.42911800 |
| C    | 1.05156500  | 2.37057800  | -1.13050700 |
| C    | 1.44996800  | 2.68669400  | -2.43835000 |
| C    | 0.97024600  | 3.84031200  | -3.05407700 |
| C    | 0.08868400  | 4.68767300  | -2.38770200 |
| C    | -0.17878700 | 3.03717800  | 1.00833100  |
| C    | -1.03596100 | 2.01911800  | 1.46673300  |
| C    | 0.35881700  | 3.94929200  | 1.94592000  |
| C    | -1.38061500 | 1.94755300  | 2.82616300  |
| C    | 0.02169300  | 3.86287800  | 3.30023000  |
| C    | -0.85934500 | 2.87106700  | 3.72575400  |
| P    | 1.60463900  | 0.81573700  | -0.31111100 |
| P    | -1.55525700 | 0.66885400  | 0.31758600  |
| C    | 2.59627800  | 1.38906200  | 1.10816800  |
| C    | 2.41443300  | 0.80433500  | 2.35872100  |
| C    | 3.55510100  | 2.39647900  | 0.94861800  |
| C    | 3.18856600  | 1.18788900  | 3.46175100  |
| C    | 4.35645800  | 2.79888000  | 2.01663300  |
| C    | 4.18117800  | 2.17576400  | 3.28220400  |
| C    | 2.78250900  | 0.00193200  | -1.45497300 |
| C    | 4.06137500  | -0.37535800 | -1.04059700 |
| C    | 2.31292500  | -0.45466100 | -2.69407500 |
| C    | 4.86050700  | -1.22529400 | -1.81836800 |
| C    | 3.10448400  | -1.24661300 | -3.52898300 |
| C    | 4.37566200  | -1.67494900 | -3.06853900 |
| C    | -2.40989400 | 1.48958900  | -1.06823200 |
| C    | -2.10168500 | 1.09074200  | -2.37194500 |
| C    | -3.36937600 | 2.48305000  | -0.86550800 |
| C    | -2.73902000 | 1.65802800  | -3.47543000 |
| C    | -4.04916400 | 3.06254700  | -1.94378600 |
| C    | -3.70988400 | 2.66699400  | -3.25905300 |
| C    | -2.81222700 | -0.27115000 | 1.26717300  |
| C    | -4.19394300 | -0.12663300 | 1.13849300  |
| C    | -2.31653900 | -1.18895200 | 2.20317400  |
| C    | -5.07722600 | -0.84899400 | 1.95640800  |
| C    | -3.15643800 | -1.89015700 | 3.06514900  |
| C    | -4.55570900 | -1.68391900 | 2.97471400  |
| H    | 2.14296300  | 2.04919200  | -2.97251500 |
| H    | 1.28334900  | 4.08045600  | -4.06591900 |
| H    | -2.04860200 | 1.17441500  | 3.18378700  |
| H    | -1.13115400 | 2.81246400  | 4.77566500  |
| H    | 1.63254600  | 0.06108200  | 2.48222100  |
| H    | 3.67097800  | 2.86508300  | -0.02255700 |
| H    | 4.43997300  | -0.01977900 | -0.08778000 |

|   |             |             |             |
|---|-------------|-------------|-------------|
| H | 1.30878100  | -0.18959100 | -3.01189900 |
| H | -1.31458100 | 0.35833000  | -2.51613200 |
| H | -3.58794800 | 2.81520100  | 0.14524300  |
| H | -4.59723900 | 0.54529800  | 0.38823000  |
| H | -1.24097000 | -1.32694000 | 2.28097200  |
| N | -5.38118700 | -2.31886800 | 3.95224300  |
| C | -6.23614700 | -1.49506400 | 4.79212400  |
| H | -5.75228600 | -0.52919100 | 4.96255300  |
| H | -7.24344900 | -1.30570000 | 4.38447700  |
| H | -6.36254100 | -1.98697300 | 5.76539100  |
| C | -5.87505000 | -3.65267300 | 3.66371100  |
| H | -5.06835900 | -4.26498500 | 3.25080600  |
| H | -6.21860200 | -4.12280500 | 4.59298600  |
| H | -6.71817100 | -3.66934700 | 2.94718600  |
| N | -4.29437400 | 3.25941900  | -4.42532000 |
| N | 5.10797100  | -2.57168300 | -3.91223800 |
| N | 5.04723200  | 2.61244000  | 4.33996800  |
| C | -4.04636800 | 4.67073400  | -4.67282500 |
| H | -4.12073800 | 4.86607600  | -5.75042300 |
| H | -4.74199400 | 5.35933100  | -4.16266200 |
| H | -3.02933600 | 4.91810100  | -4.35267300 |
| C | -5.60301100 | 2.76815800  | -4.82720500 |
| H | -5.62034900 | 1.67569000  | -4.75603100 |
| H | -6.43985800 | 3.16099100  | -4.22174600 |
| H | -5.78886400 | 3.04395500  | -5.87243900 |
| C | 5.25185700  | -3.94720000 | -3.45841300 |
| H | 5.45315800  | -4.59162400 | -4.32334900 |
| H | 6.06284000  | -4.10946200 | -2.72685300 |
| H | 4.31554700  | -4.27852600 | -2.99856800 |
| C | 6.23892700  | -2.01844900 | -4.64198500 |
| H | 7.14875500  | -1.87012400 | -4.03347700 |
| H | 6.49718800  | -2.69082000 | -5.46902300 |
| H | 5.95692000  | -1.05022700 | -5.06797300 |
| C | 4.46830300  | 3.53312000  | 5.30532600  |
| H | 3.77592300  | 3.06136400  | 6.02593200  |
| H | 5.27249000  | 4.01157700  | 5.87722400  |
| H | 3.91726500  | 4.31830100  | 4.77572800  |
| C | 5.99861200  | 1.65398400  | 4.88521800  |
| H | 6.37516200  | 1.01836000  | 4.07857800  |
| H | 6.84980500  | 2.19727100  | 5.31499200  |
| H | 5.59321700  | 0.99533400  | 5.67239300  |
| C | -6.57522700 | -0.71669900 | 1.69912000  |
| H | -7.09217500 | -1.44734600 | 2.32493800  |
| C | -6.92762200 | -1.05930100 | 0.23818400  |
| H | -6.48742100 | -0.34336100 | -0.46569500 |
| H | -6.57100500 | -2.05984600 | -0.03294900 |
| H | -8.01389900 | -1.03655400 | 0.09551600  |
| C | -7.09522200 | 0.68390200  | 2.07305000  |
| H | -8.17836800 | 0.74920800  | 1.91876300  |
| H | -6.88442500 | 0.92100900  | 3.12090100  |
| H | -6.62227200 | 1.45340900  | 1.45248900  |
| C | -2.52882300 | -2.82901000 | 4.08577500  |
| H | -3.34115100 | -3.26775700 | 4.67068900  |
| C | -1.75548700 | -3.96638100 | 3.38982600  |
| H | -0.90685300 | -3.57583900 | 2.81356500  |
| H | -1.35774900 | -4.66690500 | 4.13361500  |
| H | -2.39442800 | -4.52243000 | 2.69727300  |
| C | -1.61836400 | -2.06097700 | 5.06279700  |
| H | -0.76399100 | -1.60885000 | 4.54434200  |
| H | -2.16772500 | -1.25867500 | 5.56796500  |
| H | -1.22068200 | -2.73714900 | 5.82844200  |



|   |             |             |             |    |             |             |             |
|---|-------------|-------------|-------------|----|-------------|-------------|-------------|
| C | 2.57390500  | -1.63382000 | -4.90368700 | H  | 7.08055000  | 2.54345700  | 2.42263400  |
| H | 3.39510500  | -2.12404900 | -5.43289400 | C  | 2.91923000  | 0.50520300  | 4.79911700  |
| C | 2.14768000  | -0.39448800 | -5.71284300 | H  | 3.57434300  | 0.94437200  | 5.55207700  |
| H | 1.28351400  | 0.11075500  | -5.26606300 | C  | 1.47391500  | 0.73920100  | 5.27459800  |
| H | 2.96349400  | 0.33395300  | -5.78217400 | H  | 0.74223400  | 0.32516500  | 4.57235500  |
| H | 1.86468900  | -0.68618800 | -6.73059200 | H  | 1.31202400  | 0.26330900  | 6.24868600  |
| C | 1.41906900  | -2.64655700 | -4.79747600 | H  | 1.26231900  | 1.80878000  | 5.37072600  |
| H | 1.01520700  | -2.87831500 | -5.78958400 | C  | 3.24342400  | -0.99953300 | 4.72646700  |
| H | 1.76402900  | -3.58381300 | -4.34988900 | H  | 2.59374300  | -1.51301200 | 4.00740700  |
| H | 0.59692700  | -2.26272300 | -4.18144300 | H  | 4.28177300  | -1.16577200 | 4.41812200  |
| C | 6.20966600  | -1.65229300 | -1.25076500 | H  | 3.09758100  | -1.47190200 | 5.70470400  |
| H | 6.72766900  | -2.24980100 | -2.00168900 | Rh | 0.08226100  | -0.81949100 | -0.07257900 |
| C | 7.10965500  | -0.44304000 | -0.93407000 | C  | -2.41222600 | -3.89905100 | -0.49372700 |
| H | 6.68102700  | 0.18725200  | -0.14605500 | C  | -3.69838800 | -3.64468900 | -0.01719300 |
| H | 8.09232400  | -0.78201100 | -0.58738200 | C  | -4.42461400 | -4.68624100 | 0.56272000  |
| H | 7.25687600  | 0.18230700  | -1.82134900 | C  | -3.85549600 | -5.95429500 | 0.70244900  |
| C | 6.01683800  | -2.54312400 | -0.00719200 | C  | -2.55494700 | -6.18479200 | 0.24750300  |
| H | 5.54634000  | -1.98294900 | 0.81055800  | C  | -1.83030300 | -5.16124600 | -0.36647500 |
| H | 5.38254500  | -3.40792600 | -0.23417800 | H  | -4.13484000 | -2.65415100 | -0.09091300 |
| H | 6.98175700  | -2.91338600 | 0.35716300  | H  | -5.43621500 | -4.49821400 | 0.90822700  |
| H | -0.28322300 | 5.57841000  | -2.88060200 | H  | -4.42403800 | -6.75898600 | 1.15953700  |
| H | 0.43242100  | 4.55927200  | 4.02079000  | H  | -2.10368200 | -7.16754600 | 0.35113600  |
| O | 1.20625000  | 4.88667500  | 1.43949600  | H  | -0.83712400 | -5.35724900 | -0.75393400 |
| O | -1.14772400 | 5.16485700  | -0.35196400 | Se | -1.38544400 | -2.49335100 | -1.42067100 |
| C | 1.79716100  | 5.81885300  | 2.33432900  | H  | -2.58869600 | -1.66148600 | -1.70714700 |
| H | 2.43705000  | 5.31224900  | 3.06882600  | C  | 1.73188600  | -4.26618100 | -0.04099800 |
| H | 2.41015500  | 6.47706100  | 1.71736600  | C  | 1.61874800  | -5.45645900 | 0.67903400  |
| H | 1.03785600  | 6.41525600  | 2.85634800  | C  | 1.54314400  | -6.66991500 | -0.01167100 |
| C | -1.22399800 | 6.54891000  | -0.67498200 | C  | 1.58564600  | -6.68604400 | -1.40713100 |
| H | -1.74581600 | 6.72217300  | -1.62362800 | C  | 1.70028200  | -5.48681800 | -2.11707500 |
| H | -1.79786100 | 7.01175600  | 0.12954900  | C  | 1.76793500  | -4.26811200 | -1.43763500 |
| H | -0.22188200 | 6.99271500  | -0.72127700 | H  | 1.58767700  | -5.44130500 | 1.76399800  |
| C | -5.13096100 | 4.09630300  | -1.64817300 | H  | 1.45425500  | -7.59913200 | 0.54379100  |
| H | -5.66227200 | 4.31264300  | -2.57664900 | H  | 1.52700600  | -7.62932200 | -1.94213300 |
| C | -6.17627200 | 3.55702600  | -0.65310200 | H  | 1.72690800  | -5.49898500 | -3.20261200 |
| H | -5.74486200 | 3.40043200  | 0.34214500  | H  | 1.84215100  | -3.33386000 | -1.98451600 |
| H | -7.00020000 | 4.27101400  | -0.54334800 | Se | 1.75791800  | -2.56608700 | 0.95714200  |
| H | -6.59422100 | 2.60299800  | -0.99416800 | H  | 3.08531500  | -2.11506800 | 0.43890000  |
| C | -4.51604100 | 5.41341200  | -1.14084500 |    |             |             |             |
| H | -3.91295000 | 5.24468000  | -0.24205700 |    |             |             |             |
| H | -3.86235500 | 5.85374000  | -1.90016800 |    |             |             |             |
| H | -5.30030600 | 6.14093300  | -0.90171100 |    |             |             |             |
| C | -2.34674200 | 1.23478000  | -4.88585900 |    |             |             |             |
| H | -3.20604000 | 1.42610900  | -5.53444100 |    |             |             |             |
| C | -1.18587700 | 2.11040200  | -5.39525200 |    |             |             |             |
| H | -0.30264600 | 1.98582200  | -4.75875300 |    |             |             |             |
| H | -0.91433500 | 1.83698300  | -6.42175700 |    |             |             |             |
| H | -1.46049000 | 3.16999800  | -5.38173100 |    |             |             |             |
| C | -1.98856200 | -0.25622100 | -4.99571700 |    |             |             |             |
| H | -1.05994800 | -0.49840200 | -4.46515900 |    |             |             |             |
| H | -2.78240800 | -0.89438400 | -4.59064600 |    |             |             |             |
| H | -1.83489000 | -0.52930800 | -6.04538800 |    |             |             |             |
| C | 5.43633100  | 3.85577200  | 1.81316100  |    |             |             |             |
| H | 5.51199200  | 4.42661800  | 2.74428200  |    |             |             |             |
| C | 5.13061400  | 4.83556300  | 0.66849000  |    |             |             |             |
| H | 5.24101100  | 4.36110700  | -0.31418300 |    |             |             |             |
| H | 4.11207600  | 5.23180700  | 0.73116200  |    |             |             |             |
| H | 5.83289500  | 5.67551600  | 0.69983700  |    |             |             |             |
| C | 6.80366600  | 3.18168200  | 1.57961000  |    |             |             |             |
| H | 6.77641900  | 2.56368500  | 0.67313700  |    |             |             |             |
| H | 7.58892900  | 3.93575700  | 1.45059900  |    |             |             |             |

**4-ts**  
B3LYP-D3 SCF energy: -4372.422439 a.u.  
B3LYP-D3 enthalpy: -4370.544479 a.u.  
B3LYP-D3 free energy: -4370.794743 a.u.  
M06 SCF energy in solution: -4371.542833 a.u.  
Imaginary frequency: -403.80 cm<sup>-1</sup>

Cartesian coordinates

| ATOM | X           | Y           | Z          |
|------|-------------|-------------|------------|
| C    | 0.10272700  | 1.30294700  | 3.81850600 |
| C    | 0.37887200  | 0.52053400  | 2.67593300 |
| C    | 1.17802500  | 1.06960600  | 1.65501800 |
| C    | 1.69001000  | 2.36922100  | 1.79575300 |
| C    | 1.41247000  | 3.11857600  | 2.93550100 |
| C    | 0.61874600  | 2.59371600  | 3.95104000 |
| C    | -0.17909600 | -0.86354900 | 2.64674200 |
| C    | -1.16928600 | -1.28340800 | 1.73531300 |
| C    | 0.26956800  | -1.77226100 | 3.63648200 |
| C    | -1.72255100 | -2.56944500 | 1.85972300 |
| C    | -0.27100700 | -3.05628300 | 3.73117600 |
| C    | -1.28088100 | -3.43635500 | 2.85188200 |
| P    | 1.54335700  | 0.09891900  | 0.11700900 |

|   |             |             |             |   |             |             |             |
|---|-------------|-------------|-------------|---|-------------|-------------|-------------|
| P | -1.66216500 | -0.22666300 | 0.28337700  | C | 6.30403500  | 4.88570800  | -0.99527900 |
| C | 2.25184800  | -1.45783100 | 0.76458300  | H | 7.14119200  | 4.56188600  | -0.35326000 |
| C | 1.82153200  | -2.66769500 | 0.22155200  | H | 6.63524700  | 5.77257600  | -1.55009700 |
| C | 3.16856800  | -1.47009100 | 1.82114800  | H | 5.47803700  | 5.18373700  | -0.34284400 |
| C | 2.29023200  | -3.89463700 | 0.70415000  | C | 2.97206900  | -5.77056200 | 3.28244100  |
| C | 3.70176400  | -2.66685300 | 2.30004400  | H | 2.12654500  | -6.33618800 | 2.84993000  |
| C | 3.25419400  | -3.89213900 | 1.73806300  | H | 3.58763600  | -6.47348900 | 3.85683100  |
| C | 2.91403700  | 1.09782400  | -0.59960900 | H | 2.55733100  | -5.03290800 | 3.97766700  |
| C | 4.23173200  | 0.97813000  | -0.15954300 | C | 4.57962300  | -5.97560700 | 1.43779900  |
| C | 2.59416500  | 2.12826900  | -1.49231800 | H | 5.14762900  | -5.37450400 | 0.72169200  |
| C | 5.22243200  | 1.88620100  | -0.55264100 | H | 5.29568300  | -6.53669200 | 2.05216600  |
| C | 3.56698400  | 3.00948400  | -1.97022800 | H | 3.98569400  | -6.70950000 | 0.86761800  |
| C | 4.88866800  | 2.90869600  | -1.46874200 | C | -7.01636800 | -0.59409600 | 0.30958800  |
| C | -2.06386600 | 1.42866000  | 0.95524300  | H | -7.83337000 | -1.12381800 | -0.18228600 |
| C | -1.57798200 | 2.55332700  | 0.28157600  | C | -7.23486900 | 0.90524000  | 0.05052900  |
| C | -2.86265800 | 1.60514000  | 2.08817800  | H | -6.45736200 | 1.52166800  | 0.51507600  |
| C | -1.89439700 | 3.84666400  | 0.69710100  | H | -7.23197100 | 1.12252500  | -1.02019800 |
| C | -3.22074400 | 2.88629400  | 2.52851600  | H | -8.19861200 | 1.22055100  | 0.46614600  |
| C | -2.71513400 | 4.01309400  | 1.83941700  | C | -7.10674600 | -0.91363600 | 1.81604600  |
| C | -3.26016600 | -0.98489100 | -0.23500000 | H | -8.07008300 | -0.58526600 | 2.22319800  |
| C | -4.50892900 | -0.46788600 | 0.11094300  | H | -7.00407300 | -1.98828900 | 2.00058900  |
| C | -3.20672400 | -2.18574000 | -0.95675800 | H | -6.31326300 | -0.40120300 | 2.37013200  |
| C | -5.69581800 | -1.12531400 | -0.24210400 | C | -4.24097900 | -4.19491000 | -2.07100900 |
| C | -4.36480100 | -2.86144600 | -1.34666700 | H | -5.25220700 | -4.48529900 | -2.36797200 |
| C | -5.62568200 | -2.31755500 | -0.99861100 | C | -3.37490400 | -4.10622400 | -3.33869400 |
| H | 2.31542900  | 2.79896000  | 1.02462500  | H | -2.33225400 | -3.85743500 | -3.10736600 |
| H | 1.81449600  | 4.12293800  | 3.02943700  | H | -3.37596100 | -5.06775500 | -3.86445700 |
| H | -2.50636800 | -2.90024800 | 1.19331200  | H | -3.74980300 | -3.34108600 | -4.02716500 |
| H | -1.72502700 | -4.42392400 | 2.93927900  | C | -3.69827600 | -5.27170000 | -1.11008100 |
| H | 1.08358500  | -2.64475700 | -0.57552300 | H | -2.68393300 | -5.02579200 | -0.77076000 |
| H | 3.44605800  | -0.53387000 | 2.28878400  | H | -4.33476700 | -5.36860900 | -0.22299700 |
| H | 4.49962000  | 0.18206200  | 0.52255600  | H | -3.65719300 | -6.24761300 | -1.60750200 |
| H | 1.56243000  | 2.25332600  | -1.80709200 | C | 3.19605400  | 4.09196700  | -2.97655800 |
| H | -0.91575800 | 2.39612600  | -0.56353100 | H | 4.10886800  | 4.33565700  | -3.52798000 |
| H | -3.20635400 | 0.73592400  | 2.64137200  | C | 2.74810900  | 5.37524900  | -2.25027700 |
| H | -4.57065000 | 0.45502900  | 0.67380400  | H | 1.85693300  | 5.18708800  | -1.64200500 |
| H | -2.23950700 | -2.61813900 | -1.19973800 | H | 3.53659000  | 5.74969200  | -1.59059000 |
| N | -6.79006000 | -3.02409400 | -1.44461900 | H | 2.50555600  | 6.16394300  | -2.97225900 |
| C | -7.52569000 | -3.80919500 | -0.46559600 | C | 2.13024000  | 3.64183800  | -3.99005400 |
| H | -6.81700800 | -4.31560000 | 0.19730600  | H | 2.01003300  | 4.40301100  | -4.76848800 |
| H | -8.22090200 | -3.22485500 | 0.16210500  | H | 2.40689400  | 2.69937400  | -4.47698600 |
| H | -8.11163300 | -4.57788700 | -0.98472800 | H | 1.14708700  | 3.50188400  | -3.52449300 |
| C | -7.58207000 | -2.39976100 | -2.49077800 | C | 6.58959900  | 1.79543200  | 0.12047000  |
| H | -6.91346700 | -1.99014400 | -3.25461600 | H | 7.26784800  | 2.49017500  | -0.37687700 |
| H | -8.21309500 | -3.16050500 | -2.96617400 | C | 6.46912800  | 2.23948500  | 1.59326700  |
| H | -8.24372500 | -1.58371700 | -2.14793300 | H | 5.81614100  | 1.55883000  | 2.15362700  |
| N | -2.97692100 | 5.36009800  | 2.25217200  | H | 7.45198800  | 2.24044500  | 2.07829200  |
| N | 5.83497500  | 3.87921500  | -1.93730300 | H | 6.04616500  | 3.24685600  | 1.67209300  |
| N | 3.80138700  | -5.09489300 | 2.29727200  | C | 7.22961300  | 0.40143500  | 0.02245600  |
| C | -2.46217600 | 5.80117800  | 3.53869100  | H | 6.61159000  | -0.36994100 | 0.49579900  |
| H | -2.28756600 | 6.88458400  | 3.50586600  | H | 7.37789300  | 0.11169700  | -1.02017300 |
| H | -3.12684000 | 5.59852900  | 4.39602300  | H | 8.20339600  | 0.39963600  | 0.52498800  |
| H | -1.50417200 | 5.30814500  | 3.73019100  | H | 0.39875800  | 3.18282100  | 4.83425100  |
| C | -4.25071200 | 5.93430400  | 1.85053400  | H | 0.07573100  | -3.75255100 | 4.48453200  |
| H | -4.45403900 | 5.67645500  | 0.80566300  | O | 1.24271400  | -1.31316100 | 4.47314800  |
| H | -5.11130900 | 5.59658500  | 2.45605900  | O | -0.70292900 | 0.73120000  | 4.75945200  |
| H | -4.19709200 | 7.02727400  | 1.92679100  | C | 1.60281300  | -2.11189000 | 5.59257500  |
| C | 6.81914600  | 3.40854000  | -2.89859700 | H | 2.10905200  | -3.03446300 | 5.28068400  |
| H | 7.29979200  | 4.27200100  | -3.37353100 | H | 2.29618000  | -1.50869900 | 6.18007300  |
| H | 7.61489200  | 2.77441500  | -2.46750400 | H | 0.72682000  | -2.36100300 | 6.20465500  |
| H | 6.31457500  | 2.83025700  | -3.67959600 | C | -0.47086000 | 1.07044600  | 6.12324700  |

|    |             |             |             |
|----|-------------|-------------|-------------|
| H  | -0.84750700 | 2.07029400  | 6.36820200  |
| H  | -1.02198500 | 0.33452400  | 6.71219500  |
| H  | 0.59816700  | 1.01046400  | 6.36002100  |
| C  | -4.13355000 | 3.02299600  | 3.74344800  |
| H  | -4.45108700 | 4.06470700  | 3.81335600  |
| C  | -5.41175200 | 2.17699900  | 3.60923600  |
| H  | -5.18856000 | 1.10459600  | 3.62128900  |
| H  | -6.08951400 | 2.37792800  | 4.44652200  |
| H  | -5.94401300 | 2.40124800  | 2.67862200  |
| C  | -3.38397300 | 2.67000800  | 5.04062300  |
| H  | -3.03288000 | 1.63399300  | 5.01328700  |
| H  | -2.50801100 | 3.31375900  | 5.17336400  |
| H  | -4.03752900 | 2.79537900  | 5.91178000  |
| C  | -1.31840900 | 5.06008900  | -0.02650000 |
| H  | -2.02331700 | 5.88454300  | 0.11272500  |
| C  | 0.00981000  | 5.48744600  | 0.62699400  |
| H  | 0.76085600  | 4.69708200  | 0.52407700  |
| H  | 0.39929200  | 6.39644500  | 0.15381600  |
| H  | -0.12618600 | 5.68608900  | 1.69427300  |
| C  | -1.13050700 | 4.84987000  | -1.53670700 |
| H  | -0.38281100 | 4.07849400  | -1.75597000 |
| H  | -2.06601700 | 4.56212600  | -2.02836100 |
| H  | -0.77817100 | 5.77625700  | -2.00300700 |
| C  | 4.77430200  | -2.65022900 | 3.38649800  |
| H  | 4.54625400  | -3.46006800 | 4.08899400  |
| C  | 4.83915400  | -1.33164200 | 4.17513400  |
| H  | 5.26259400  | -0.52125900 | 3.56789800  |
| H  | 3.85371300  | -1.00626500 | 4.51962000  |
| H  | 5.49182400  | -1.45245900 | 5.04636200  |
| C  | 6.16023400  | -2.94945200 | 2.77790300  |
| H  | 6.42508000  | -2.18417100 | 2.03764800  |
| H  | 6.93061800  | -2.94346200 | 3.55789600  |
| H  | 6.17954200  | -3.92496400 | 2.28836200  |
| C  | 1.75443800  | -5.17563900 | 0.06894400  |
| H  | 2.06603600  | -6.02035400 | 0.68523100  |
| C  | 0.21623300  | -5.21140800 | 0.01459300  |
| H  | -0.18731100 | -4.42257200 | -0.63112800 |
| H  | -0.12379600 | -6.17223800 | -0.38836300 |
| H  | -0.21711500 | -5.07661100 | 1.00880800  |
| C  | 2.34666400  | -5.37785200 | -1.33969400 |
| H  | 2.00559900  | -4.58852200 | -2.02081500 |
| H  | 3.44178900  | -5.35989100 | -1.32298900 |
| H  | 2.02759700  | -6.33843800 | -1.76000900 |
| Rh | -0.11838500 | -0.27740500 | -1.41377900 |
| C  | 3.44530400  | -0.90439800 | -3.16110400 |
| C  | 4.33765400  | -0.03169500 | -3.78880600 |
| C  | 5.70943600  | -0.24219100 | -3.64349200 |
| C  | 6.18136100  | -1.32016400 | -2.89025200 |
| C  | 5.28116500  | -2.17440700 | -2.25260800 |
| C  | 3.90716900  | -1.97105500 | -2.38867500 |
| H  | 3.97186500  | 0.79264100  | -4.39151000 |
| H  | 6.40952900  | 0.42799100  | -4.13307900 |
| H  | 7.24980000  | -1.49412800 | -2.80363300 |
| H  | 5.64115500  | -3.00422300 | -1.65093500 |
| H  | 3.21133300  | -2.63495800 | -1.89476300 |
| Se | 1.52564500  | -0.78870800 | -3.56950900 |
| H  | 1.18802700  | 0.57146000  | -2.91393400 |
| C  | -3.42971200 | 0.60564600  | -3.15853800 |
| C  | -4.67561800 | 0.15293700  | -3.59069000 |
| C  | -5.78481900 | 0.99090000  | -3.45341400 |
| C  | -5.64263900 | 2.25736900  | -2.88274000 |

|    |             |             |             |
|----|-------------|-------------|-------------|
| C  | -4.39169100 | 2.68763000  | -2.43529300 |
| C  | -3.27628300 | 1.86150400  | -2.57642600 |
| H  | -4.78216600 | -0.83371100 | -4.02932000 |
| H  | -6.75926300 | 0.64910100  | -3.79011100 |
| H  | -6.50848300 | 2.90446900  | -2.77746100 |
| H  | -4.28018300 | 3.66260600  | -1.96953900 |
| H  | -2.30408700 | 2.18492800  | -2.23023900 |
| Se | -1.88064300 | -0.59285900 | -3.38902700 |
| H  | -1.21093200 | 0.25529900  | -4.42777900 |

## 5

B3LYP-D3 SCF energy: -4372.445771 a.u.

B3LYP-D3 enthalpy: -4370.565478 a.u.

B3LYP-D3 free energy: -4370.818016 a.u.

M06 SCF energy in solution: -4371.562589 a.u.

## Cartesian coordinates

| ATOM | X           | Y           | Z           |
|------|-------------|-------------|-------------|
| C    | 0.05835700  | 1.93439700  | 3.47546000  |
| C    | 0.37627000  | 0.97846500  | 2.48612300  |
| C    | 1.18924900  | 1.37049200  | 1.40204800  |
| C    | 1.67103000  | 2.68718400  | 1.33251800  |
| C    | 1.35869700  | 3.60566200  | 2.33107000  |
| C    | 0.55149100  | 3.23909000  | 3.40319900  |
| C    | -0.14213900 | -0.40725100 | 2.69093900  |
| C    | -1.12320300 | -0.99525900 | 1.86785300  |
| C    | 0.32839400  | -1.13430500 | 3.81081600  |
| C    | -1.62077800 | -2.27467300 | 2.16870100  |
| C    | -0.15934400 | -2.41401000 | 4.08971300  |
| C    | -1.14106300 | -2.96838200 | 3.27298800  |
| P    | 1.65388300  | 0.16901700  | 0.06987600  |
| P    | -1.70106500 | -0.13617700 | 0.33539300  |
| C    | 2.36928500  | -1.23042600 | 0.99402800  |
| C    | 2.01992500  | -2.54251100 | 0.68369000  |
| C    | 3.26553600  | -0.98772500 | 2.04296500  |
| C    | 2.56596800  | -3.62662400 | 1.38193200  |
| C    | 3.87048100  | -2.03900800 | 2.73027000  |
| C    | 3.51923500  | -3.37320700 | 2.39304900  |
| C    | 2.98560700  | 1.05838800  | -0.81323900 |
| C    | 4.30188000  | 1.06309200  | -0.35057400 |
| C    | 2.63584400  | 1.91390900  | -1.86223500 |
| C    | 5.26028200  | 1.93025400  | -0.88598000 |
| C    | 3.57094700  | 2.76700300  | -2.44945900 |
| C    | 4.90231500  | 2.76898000  | -1.96636100 |
| C    | -2.24551600 | 1.52982800  | 0.85392200  |
| C    | -1.84699500 | 2.65831600  | 0.13342900  |
| C    | -3.08792800 | 1.69742300  | 1.95883500  |
| C    | -2.29912000 | 3.93733700  | 0.46051700  |
| C    | -3.57627100 | 2.96008400  | 2.31509600  |
| C    | -3.16632100 | 4.09118100  | 1.56902400  |
| C    | -3.18260300 | -1.10224700 | -0.15578800 |
| C    | -4.48986200 | -0.74022800 | 0.16030100  |
| C    | -2.95526700 | -2.32366200 | -0.81078300 |
| C    | -5.57188700 | -1.57681600 | -0.15680300 |
| C    | -4.00510800 | -3.16016900 | -1.18593300 |
| C    | -5.33261700 | -2.77067600 | -0.87130200 |
| H    | 2.30359000  | 2.99636900  | 0.51076800  |
| H    | 1.74505800  | 4.61828700  | 2.26877000  |
| H    | -2.38741600 | -2.72686100 | 1.55441800  |
| H    | -1.53593900 | -3.95360100 | 3.50298500  |
| H    | 1.31942200  | -2.73143200 | -0.12156800 |

|   |             |             |             |   |             |             |             |
|---|-------------|-------------|-------------|---|-------------|-------------|-------------|
| H | 3.48159900  | 0.03402400  | 2.32924500  | H | -2.20579900 | -5.18114200 | -0.53267000 |
| H | 4.59321400  | 0.40199700  | 0.45545000  | H | -2.28491600 | -6.07171400 | -2.06349200 |
| H | 1.61978200  | 1.90480800  | -2.24106500 | C | 3.12761400  | 3.66800600  | -3.59379000 |
| H | -1.14489200 | 2.54417900  | -0.68460600 | H | 3.98392700  | 4.29331700  | -3.85914600 |
| H | -3.36343600 | 0.83346100  | 2.55608600  | C | 1.96855900  | 4.58957700  | -3.17045000 |
| H | -4.68116200 | 0.19228100  | 0.67761500  | H | 1.06206400  | 4.01819200  | -2.93463600 |
| H | -1.93598100 | -2.63387600 | -1.01803900 | H | 2.22853400  | 5.17733000  | -2.28242800 |
| N | -6.38060300 | -3.64765500 | -1.30378500 | H | 1.71666800  | 5.28578300  | -3.97855700 |
| C | -6.94137900 | -4.54679900 | -0.30561400 | C | 2.75126100  | 2.84074500  | -4.83679600 |
| H | -6.13203400 | -4.97241500 | 0.29651100  | H | 2.44239300  | 3.49705000  | -5.65862000 |
| H | -7.66110400 | -4.06821200 | 0.38170500  | H | 3.60294200  | 2.24403200  | -5.18020900 |
| H | -7.45859300 | -5.37135400 | -0.81104700 | H | 1.92322800  | 2.15233700  | -4.62396400 |
| C | -7.32032100 | -3.14416000 | -2.29319700 | C | 6.62669700  | 1.99166800  | -0.20852900 |
| H | -6.78109500 | -2.53945000 | -3.02751800 | H | 7.21907400  | 2.76505000  | -0.69922700 |
| H | -7.77534800 | -3.99262600 | -2.81905500 | C | 6.47989100  | 2.41710500  | 1.26630300  |
| H | -8.14044600 | -2.52737000 | -1.88517100 | H | 5.93789100  | 1.66335100  | 1.84900400  |
| N | -3.57779000 | 5.42354100  | 1.89240000  | H | 7.46628000  | 2.54565700  | 1.72631400  |
| N | 5.83754200  | 3.63286200  | -2.61852500 | H | 5.93369300  | 3.36299400  | 1.35337600  |
| N | 4.16351500  | -4.41641100 | 3.13772000  | C | 7.40089000  | 0.66811600  | -0.32636300 |
| C | -3.11491900 | 5.99980000  | 3.14451900  | H | 6.84640700  | -0.16128200 | 0.12869600  |
| H | -3.09273400 | 7.09312200  | 3.05180900  | H | 7.57653400  | 0.40792100  | -1.37360000 |
| H | -3.73403500 | 5.75365100  | 4.02444000  | H | 8.36972700  | 0.74508800  | 0.18023600  |
| H | -2.09442100 | 5.65590400  | 3.34103900  | H | 0.30522000  | 3.96089700  | 4.17372800  |
| C | -4.89956600 | 5.83279000  | 1.44643000  | H | 0.21110700  | -2.97616900 | 4.93775000  |
| H | -5.05501600 | 5.49826100  | 0.41514100  | O | 1.26252000  | -0.51150600 | 4.58093900  |
| H | -5.72982600 | 5.43844700  | 2.05970500  | O | -0.75671000 | 1.50930100  | 4.48252900  |
| H | -4.96418900 | 6.92748000  | 1.46094200  | C | 1.64448000  | -1.12444000 | 5.80679900  |
| C | 6.98646400  | 3.03089900  | -3.27775000 | H | 2.20229200  | -2.05310900 | 5.63217400  |
| H | 7.30962700  | 3.68063300  | -4.10121500 | H | 2.29558500  | -0.40829700 | 6.30918400  |
| H | 7.86056600  | 2.86413900  | -2.62487300 | H | 0.77196000  | -1.33021600 | 6.43932200  |
| H | 6.69180100  | 2.06604400  | -3.69856800 | C | -0.54866000 | 2.06475700  | 5.77792700  |
| C | 6.06553900  | 4.93231100  | -2.00768200 | H | -0.91697100 | 3.09467000  | 5.84969200  |
| H | 6.71876500  | 4.90136200  | -1.11652500 | H | -1.12163700 | 1.44086900  | 6.46635800  |
| H | 6.53014700  | 5.60301500  | -2.74062600 | H | 0.51455000  | 2.03454400  | 6.04412300  |
| H | 5.10684100  | 5.36897700  | -1.70828300 | C | -4.53263600 | 3.07074100  | 3.49863100  |
| C | 3.38532200  | -5.00270800 | 4.21709500  | H | -4.93751400 | 4.08385800  | 3.51419800  |
| H | 2.59367300  | -5.69632500 | 3.87966800  | C | -5.73104400 | 2.11439600  | 3.36375300  |
| H | 4.05337500  | -5.55647800 | 4.88771600  | H | -5.42053900 | 1.06632200  | 3.43454700  |
| H | 2.90630300  | -4.20602100 | 4.79676500  | H | -6.45327100 | 2.29496000  | 4.16768600  |
| C | 5.02555200  | -5.34732200 | 2.42089900  | H | -6.24544700 | 2.25044600  | 2.40609900  |
| H | 5.54082600  | -4.81708500 | 1.61494800  | C | -3.79675300 | 2.84055600  | 4.83070100  |
| H | 5.78469500  | -5.73765300 | 3.11082000  | H | -3.33233100 | 1.84938500  | 4.85464300  |
| H | 4.50368800  | -6.21146800 | 1.97705100  | H | -3.00305300 | 3.58140800  | 4.96903400  |
| C | -6.95086200 | -1.21720500 | 0.39019900  | H | -4.49168500 | 2.92118300  | 5.67451600  |
| H | -7.67945100 | -1.91517300 | -0.02304500 | C | -1.82543800 | 5.13684400  | -0.35327300 |
| C | -7.41247100 | 0.19721500  | 0.00407900  | H | -2.46048800 | 5.98024100  | -0.07072000 |
| H | -6.72659500 | 0.96817000  | 0.37287100  | C | -0.37631900 | 5.50623200  | 0.01276400  |
| H | -7.47696400 | 0.30458700  | -1.08172000 | H | 0.31077800  | 4.68812000  | -0.23130600 |
| H | -8.40082700 | 0.40043900  | 0.43141600  | H | -0.05611300 | 6.39738600  | -0.53966800 |
| C | -6.96301000 | -1.41048200 | 1.92046200  | H | -0.28256900 | 5.71116800  | 1.08409300  |
| H | -7.96005500 | -1.20443000 | 2.32634600  | C | -1.95745500 | 4.92245000  | -1.87067300 |
| H | -6.68730300 | -2.43567000 | 2.19077400  | H | -1.29379000 | 4.12785300  | -2.23358000 |
| H | -6.25391900 | -0.73315000 | 2.40810700  | H | -2.98229500 | 4.66303100  | -2.15680500 |
| C | -3.72915900 | -4.45908500 | -1.93555500 | H | -1.68079400 | 5.83776200  | -2.40537800 |
| H | -4.50185600 | -5.17340800 | -1.63618200 | C | 4.93070600  | -1.75397800 | 3.79017800  |
| C | -3.87840600 | -4.24410600 | -3.45502500 | H | 4.78230700  | -2.47052100 | 4.60563200  |
| H | -3.13250900 | -3.52831800 | -3.82092400 | C | 4.86076200  | -0.33328200 | 4.37444100  |
| H | -3.73091100 | -5.18738300 | -3.99315800 | H | 5.22265400  | 0.41452900  | 3.65837000  |
| H | -4.87550100 | -3.86716000 | -3.70174900 | H | 3.84322500  | -0.05104600 | 4.65737300  |
| C | -2.35879800 | -5.07630800 | -1.61288700 | H | 5.50278500  | -0.26385600 | 5.25904900  |
| H | -1.53018100 | -4.48133200 | -2.01689000 | C | 6.34004100  | -2.00242700 | 3.21284100  |

|    |             |             |             |
|----|-------------|-------------|-------------|
| H  | 6.52864900  | -1.33341600 | 2.36361700  |
| H  | 7.10559500  | -1.80612300 | 3.97260500  |
| H  | 6.45545900  | -3.03329900 | 2.87182000  |
| C  | 2.12739800  | -5.03258600 | 0.98058700  |
| H  | 2.54806100  | -5.74197200 | 1.69434400  |
| C  | 0.59867300  | -5.20272800 | 1.03615400  |
| H  | 0.08873100  | -4.54203500 | 0.32652600  |
| H  | 0.32553600  | -6.23334100 | 0.78208900  |
| H  | 0.21435300  | -4.97686500 | 2.03472000  |
| C  | 2.66529000  | -5.39708100 | -0.41721300 |
| H  | 2.23737900  | -4.74369100 | -1.18689900 |
| H  | 3.75572500  | -5.30200000 | -0.46313900 |
| H  | 2.40282700  | -6.43012000 | -0.67230700 |
| Rh | -0.07978700 | -0.38104000 | -1.34586100 |
| Se | 1.37091400  | -1.66090000 | -2.97521000 |
| C  | 3.31651800  | -1.43700100 | -2.89272000 |
| C  | 3.92610800  | -0.62412100 | -3.85628400 |
| C  | 4.10871800  | -2.16486000 | -1.99742300 |
| C  | 5.31739800  | -0.55166400 | -3.93024400 |
| H  | 3.31436900  | -0.06346900 | -4.55416300 |
| C  | 5.50032300  | -2.08450500 | -2.07395600 |
| H  | 3.64842300  | -2.79655600 | -1.24948300 |
| C  | 6.10879300  | -1.28637300 | -3.04450900 |
| H  | 5.78101700  | 0.06618500  | -4.69485800 |
| H  | 6.10821200  | -2.65620500 | -1.37744600 |
| H  | 7.19175500  | -1.24431900 | -3.11649900 |
| H  | -0.25918300 | 1.12218200  | -1.56112400 |
| C  | -3.45135000 | 0.26173400  | -3.18988400 |
| C  | -4.61974400 | -0.37896500 | -3.60358000 |
| C  | -5.84112000 | 0.28645800  | -3.47247700 |
| C  | -5.88944900 | 1.56897300  | -2.92372300 |
| C  | -4.71449100 | 2.19029900  | -2.49686300 |
| C  | -3.48828300 | 1.53980100  | -2.63506100 |
| H  | -4.58148900 | -1.37616900 | -4.02868000 |
| H  | -6.75437700 | -0.19987000 | -3.80247200 |
| H  | -6.84172000 | 2.08114700  | -2.82360800 |
| H  | -4.74714600 | 3.17936400  | -2.04992800 |
| H  | -2.57839400 | 2.02338200  | -2.30753500 |
| Se | -1.74423200 | -0.69838800 | -3.42199100 |
| H  | -1.09665300 | 0.33846400  | -4.27260000 |

## 6

B3LYP-D3 SCF energy: -408.884183 a.u.

B3LYP-D3 enthalpy: -408.750038 a.u.

B3LYP-D3 free energy: -408.791482 a.u.

M06 SCF energy in solution: -408.707820 a.u

Cartesian coordinates

| ATOM | X           | Y           | Z           |
|------|-------------|-------------|-------------|
| C    | 0.98304800  | -1.22190000 | 0.00025700  |
| C    | -0.39756300 | -1.05394800 | 0.00043300  |
| C    | -0.97891100 | 0.22896300  | 0.00028600  |
| C    | -0.11661200 | 1.33981500  | 0.00001000  |
| C    | 1.26954700  | 1.19094700  | -0.00016000 |
| C    | 1.79899200  | -0.09310100 | -0.00005200 |
| H    | 1.43741500  | -2.20721500 | 0.00034200  |
| H    | -1.03095100 | -1.93558300 | 0.00074700  |
| H    | -0.54023400 | 2.34116400  | -0.00008600 |
| H    | 1.93676200  | 2.04640700  | -0.00036400 |
| F    | 3.13865100  | -0.25416600 | -0.00029800 |
| C    | -2.43334400 | 0.45413100  | 0.00039800  |

|   |             |             |             |
|---|-------------|-------------|-------------|
| H | -2.72747300 | 1.50400100  | 0.00131500  |
| C | -3.40361800 | -0.46916800 | -0.00065900 |
| H | -3.20302900 | -1.53728600 | -0.00175900 |
| H | -4.44957700 | -0.17842900 | -0.00059000 |

## 7

B3LYP-D3 SCF energy: -4539.849992 a.u.

B3LYP-D3 enthalpy: -4537.941146 a.u.

B3LYP-D3 free energy: -4538.195187 a.u.

M06 SCF energy in solution: -4538.822115 a.u

Cartesian coordinates

| ATOM | X           | Y           | Z           |
|------|-------------|-------------|-------------|
| C    | 0.34019300  | -4.22942400 | 1.14486700  |
| C    | -0.08184500 | -2.88505300 | 1.09236900  |
| C    | -0.85632400 | -2.46300500 | -0.00658000 |
| C    | -1.18926700 | -3.36983200 | -1.02527100 |
| C    | -0.76461400 | -4.69372900 | -0.94769800 |
| C    | -0.00214600 | -5.13030500 | 0.13195000  |
| C    | 0.29300200  | -2.00242300 | 2.23748000  |
| C    | 1.24208500  | -0.96737100 | 2.13063200  |
| C    | -0.28638300 | -2.27072800 | 3.49982900  |
| C    | 1.60292100  | -0.22548900 | 3.26649000  |
| C    | 0.04913000  | -1.49926700 | 4.61677900  |
| C    | 1.00081400  | -0.48989100 | 4.49227700  |
| P    | -1.50054400 | -0.74060600 | -0.09753000 |
| P    | 1.83191500  | -0.43540600 | 0.46122700  |
| C    | -2.50414200 | -0.55718900 | 1.40671200  |
| C    | -2.51481900 | 0.61509400  | 2.15520300  |
| C    | -3.31346500 | -1.63362600 | 1.79850400  |
| C    | -3.29709300 | 0.73225000  | 3.30964400  |
| C    | -4.16968900 | -1.52663100 | 2.89381600  |
| C    | -4.16002700 | -0.32979700 | 3.65948600  |
| C    | -2.61936000 | -0.73796100 | -1.53835900 |
| C    | -3.99572200 | -0.88984200 | -1.39776200 |
| C    | -2.07565100 | -0.53549900 | -2.81602200 |
| C    | -4.84586400 | -0.84786600 | -2.50991000 |
| C    | -2.89583800 | -0.41526600 | -3.93692700 |
| C    | -4.29906700 | -0.56068800 | -3.77942300 |
| C    | 2.47716100  | -1.90698800 | -0.39777800 |
| C    | 2.13759800  | -2.11218100 | -1.73631600 |
| C    | 3.35084700  | -2.80046700 | 0.23025800  |
| C    | 2.66484700  | -3.17907400 | -2.46699500 |
| C    | 3.90403800  | -3.88027700 | -0.46664900 |
| C    | 3.54192000  | -4.08226900 | -1.82126500 |
| C    | 3.26805900  | 0.66614700  | 0.74864800  |
| C    | 4.55927100  | 0.31655800  | 0.35020600  |
| C    | 3.05833400  | 1.92773300  | 1.32811300  |
| C    | 5.63980400  | 1.19218900  | 0.52182300  |
| C    | 4.12422400  | 2.78732600  | 1.60514600  |
| C    | 5.43048600  | 2.42297000  | 1.18369400  |
| H    | -1.79246900 | -3.05200600 | -1.86600300 |
| H    | -1.03329200 | -5.39164500 | -1.73479400 |
| H    | 2.35361100  | 0.55088500  | 3.20371200  |
| H    | 1.27777200  | 0.09483900  | 5.36470700  |
| H    | -1.91029300 | 1.45672100  | 1.84461000  |
| H    | -3.27921500 | -2.55593200 | 1.23170100  |
| H    | -4.42381900 | -1.03884600 | -0.41380800 |
| H    | -1.00078700 | -0.42687800 | -2.92880100 |
| H    | 1.42674700  | -1.44556200 | -2.21419900 |
| H    | 3.60404200  | -2.65246100 | 1.27607800  |

|   |             |             |             |   |             |             |             |
|---|-------------|-------------|-------------|---|-------------|-------------|-------------|
| H | 4.73419200  | -0.64368100 | -0.11991400 | H | -0.15084800 | -0.00460000 | -4.84892400 |
| H | 2.05274000  | 2.23078600  | 1.60458300  | H | -0.77365900 | -1.59013600 | -5.33429900 |
| N | 6.48651900  | 3.34696200  | 1.45654200  | H | -0.55550700 | -0.30401200 | -6.53495800 |
| C | 7.56942000  | 2.93728500  | 2.33776500  | C | -2.38327600 | 1.51284000  | -5.43540100 |
| H | 7.17274700  | 2.28591800  | 3.12196000  | H | -1.94430800 | 1.83305200  | -6.38772300 |
| H | 8.39652300  | 2.40685600  | 1.83636300  | H | -3.42087400 | 1.85609000  | -5.40246200 |
| H | 7.99366600  | 3.82729800  | 2.81986600  | H | -1.84354300 | 2.00398300  | -4.61627600 |
| C | 6.86158800  | 4.25382100  | 0.38242300  | C | -6.32929800 | -1.11625800 | -2.28059800 |
| H | 5.96265300  | 4.60983900  | -0.12948100 | H | -6.83313300 | -1.12014200 | -3.24815900 |
| H | 7.38060100  | 5.12354700  | 0.80339500  | C | -6.55003000 | -2.50937700 | -1.65886500 |
| H | 7.52542900  | 3.79866200  | -0.37485200 | H | -6.10168300 | -2.58266200 | -0.66091400 |
| N | 4.01556900  | -5.19257400 | -2.59045100 | H | -7.62166000 | -2.71365200 | -1.55561700 |
| N | -5.10044000 | -0.38323800 | -4.95199600 | H | -6.10998500 | -3.29558600 | -2.28249800 |
| N | -5.06301300 | -0.26533000 | 4.77155400  | C | -6.97455500 | -0.01472700 | -1.41868400 |
| C | 3.57582900  | -6.52326400 | -2.20282500 | H | -6.52655100 | 0.01969900  | -0.41836900 |
| H | 3.62017300  | -7.18594900 | -3.07635100 | H | -6.84606900 | 0.97221900  | -1.87546200 |
| H | 4.16978100  | -6.99267300 | -1.39939300 | H | -8.04773700 | -0.20158800 | -1.29859300 |
| H | 2.53461100  | -6.47247200 | -1.86841000 | H | 0.32701100  | -6.16195200 | 0.18528000  |
| C | 5.35734900  | -5.09271900 | -3.14265600 | H | -0.41143200 | -1.68456500 | 5.57900300  |
| H | 5.50344100  | -4.09254100 | -3.56361000 | O | -1.16877000 | -3.30544800 | 3.54013700  |
| H | 6.16538100  | -5.27502700 | -2.41150700 | O | 1.09915800  | -4.57648800 | 2.22084900  |
| H | 5.47011000  | -5.82205400 | -3.95386200 | C | -1.74861100 | -3.64940600 | 4.79277400  |
| C | -6.06861600 | 0.70509300  | -4.96522700 | H | -2.38101500 | -2.83685200 | 5.16954900  |
| H | -6.23979700 | 1.01777200  | -6.00315700 | H | -2.36751400 | -4.52707600 | 4.60552000  |
| H | -7.05008400 | 0.45585600  | -4.52779700 | H | -0.98031800 | -3.89692300 | 5.53585600  |
| H | -5.66160300 | 1.55863600  | -4.41566400 | C | 0.96322500  | -5.90195100 | 2.72870400  |
| C | -5.51191000 | -1.59464900 | -5.64564600 | H | 1.45697200  | -6.64094500 | 2.08769400  |
| H | -6.34115700 | -2.13407800 | -5.15342400 | H | 1.45477900  | -5.89903600 | 3.70314800  |
| H | -5.83492900 | -1.33875200 | -6.66190300 | H | -0.09530800 | -6.16218500 | 2.84672600  |
| H | -4.66171900 | -2.28060000 | -5.72151800 | C | 4.88375500  | -4.79642400 | 0.25982300  |
| C | -4.50230100 | -0.56100200 | 6.08005000  | H | 5.30344500  | -5.49246300 | -0.46766700 |
| H | -3.86618300 | 0.24343400  | 6.49153200  | C | 6.06698000  | -4.00955500 | 0.85207200  |
| H | -5.31751900 | -0.74137500 | 6.79080000  | H | 5.74350700  | -3.30984400 | 1.63121800  |
| H | -3.89758500 | -1.47251800 | 6.02544800  | H | 6.79104300  | -4.69557600 | 1.30569900  |
| C | -6.08826000 | 0.77155700  | 4.76160000  | H | 6.58351600  | -3.43536500 | 0.07516700  |
| H | -6.42649200 | 0.93607000  | 3.73476200  | C | 4.16964900  | -5.62895600 | 1.33922500  |
| H | -6.94737100 | 0.42923600  | 5.35261000  | H | 3.68771100  | -4.98480200 | 2.08174200  |
| H | -5.76710600 | 1.74280000  | 5.17218300  | H | 3.39221400  | -6.25595600 | 0.88970800  |
| C | 7.00522300  | 0.76638300  | -0.00726600 | H | 4.88106700  | -6.28379000 | 1.85525800  |
| H | 7.67040400  | 1.63082400  | 0.03422700  | C | 2.27405400  | -3.34606400 | -3.92906300 |
| C | 6.94009100  | 0.32579800  | -1.48238700 | H | 2.88892600  | -4.15521400 | -4.33089700 |
| H | 6.35528100  | -0.59277400 | -1.60990300 | C | 0.80109200  | -3.77226500 | -4.06163700 |
| H | 6.48812500  | 1.10277000  | -2.10886100 | H | 0.12879500  | -3.02482500 | -3.62460500 |
| H | 7.94948700  | 0.12668400  | -1.85931300 | H | 0.53030500  | -3.89786100 | -5.11645700 |
| C | 7.61410200  | -0.34311400 | 0.87115200  | H | 0.62041000  | -4.72033000 | -3.54471000 |
| H | 8.60531900  | -0.62925000 | 0.50110100  | C | 2.56003900  | -2.07235400 | -4.74521400 |
| H | 7.71847400  | -0.01779300 | 1.91126400  | H | 1.93253300  | -1.23182100 | -4.42490800 |
| H | 6.97997800  | -1.23617300 | 0.86206500  | H | 3.60740000  | -1.76482300 | -4.64929000 |
| C | 3.87730700  | 4.07592200  | 2.37983300  | H | 2.35084000  | -2.24530200 | -5.80684700 |
| H | 4.86211400  | 4.44498400  | 2.67856900  | C | -5.13531200 | -2.66097500 | 3.22674000  |
| C | 3.21633700  | 5.15273300  | 1.50258200  | H | -5.16143600 | -2.76467400 | 4.31725500  |
| H | 2.21518500  | 4.84520500  | 1.18637600  | C | -4.73116800 | -4.01675600 | 2.62368200  |
| H | 3.11279800  | 6.09167700  | 2.05907900  | H | -4.88428600 | -4.03540200 | 1.53724900  |
| H | 3.81198500  | 5.35704400  | 0.60574500  | H | -3.68075800 | -4.25963700 | 2.81220800  |
| C | 3.05082400  | 3.82932800  | 3.65558700  | H | -5.35358600 | -4.81168000 | 3.04799300  |
| H | 2.03011800  | 3.49698000  | 3.42853700  | C | -6.56353000 | -2.29879100 | 2.76814500  |
| H | 3.51790300  | 3.06804400  | 4.29086400  | H | -6.59063500 | -2.14624600 | 1.68200200  |
| H | 2.97083100  | 4.75400800  | 4.23831700  | H | -7.26096800 | -3.10878600 | 3.01172000  |
| C | -2.30522900 | -0.02088800 | -5.28527700 | H | -6.91690300 | -1.38681200 | 3.25313100  |
| H | -2.93580500 | -0.45699000 | -6.06520000 | C | -3.16302800 | 2.01254400  | 4.12789500  |
| C | -0.86784100 | -0.51304900 | -5.50630900 | H | -3.74361600 | 1.89814500  | 5.04452500  |

|    |             |            |             |   |             |             |             |
|----|-------------|------------|-------------|---|-------------|-------------|-------------|
| C  | -1.70123900 | 2.24950900 | 4.55788000  | P | -1.90046300 | -0.18295600 | -0.35316400 |
| H  | -1.05515500 | 2.45108000 | 3.69689000  | C | 2.14834800  | -1.52058500 | -1.42415500 |
| H  | -1.64105800 | 3.11745800 | 5.22435700  | C | 2.19746000  | -0.48388300 | -2.35160600 |
| H  | -1.29595800 | 1.37762400 | 5.08268100  | C | 2.75050500  | -2.74750400 | -1.72666700 |
| C  | -3.71921200 | 3.22854300 | 3.36140100  | C | 2.80100800  | -0.65281500 | -3.60291400 |
| H  | -3.16109400 | 3.40465000 | 2.43560100  | C | 3.40485800  | -2.94429800 | -2.94243700 |
| H  | -4.77235900 | 3.08137700 | 3.09894600  | C | 3.41899700  | -1.88882900 | -3.89512500 |
| H  | -3.64167600 | 4.13438600 | 3.97352200  | C | 2.62087100  | -1.20159600 | 1.44088100  |
| Rh | 0.09312400  | 0.81450100 | -0.53613400 | C | 3.97196300  | -1.18389300 | 1.10436600  |
| C  | -1.43999600 | 3.98850100 | 0.00970900  | C | 2.24907000  | -0.91223200 | 2.76206700  |
| C  | -2.01774700 | 5.20825200 | -0.37769700 | C | 4.95868000  | -0.88369300 | 2.05351500  |
| C  | -1.78333900 | 6.37243000 | 0.35350400  | C | 3.19790800  | -0.59194300 | 3.73320400  |
| C  | -0.97050700 | 6.34509500 | 1.48972500  | C | 4.57065000  | -0.57199300 | 3.37478800  |
| C  | -0.39854600 | 5.13680000 | 1.88770400  | C | -2.80221200 | -1.21535300 | 0.84475400  |
| C  | -0.62497000 | 3.97093200 | 1.15206900  | C | -2.41240400 | -1.15055400 | 2.18655900  |
| H  | -2.64423500 | 5.24850600 | -1.26356800 | C | -3.88046200 | -2.02514600 | 0.48366300  |
| H  | -2.22945800 | 7.30744300 | 0.02570800  | C | -3.05654200 | -1.90019600 | 3.16939300  |
| H  | -0.78956200 | 7.25276400 | 2.05798100  | C | -4.58857300 | -2.75393200 | 1.44804500  |
| H  | 0.22891800  | 5.09460300 | 2.77390300  | C | -4.14487900 | -2.72454100 | 2.79072400  |
| H  | -0.16439600 | 3.04437900 | 1.47870500  | C | -3.06253600 | 1.11264200  | -0.92686600 |
| Se | -1.89952400 | 2.40486200 | -1.04730500 | C | -4.41474500 | 1.12136800  | -0.58426600 |
| H  | -0.19435500 | 1.16393900 | 0.91358400  | C | -2.56626600 | 2.14900400  | -1.72987600 |
| C  | 1.40357900  | 5.90987400 | -1.43279000 | C | -5.27457100 | 2.13753900  | -1.02504000 |
| C  | 1.60993300  | 4.54883100 | -1.61010400 | C | -3.40170200 | 3.13688500  | -2.24958200 |
| C  | 0.88611700  | 3.82746100 | -2.57710000 | C | -4.77489800 | 3.13574700  | -1.89217100 |
| C  | -0.05041800 | 4.51546500 | -3.36941000 | H | 1.37461400  | -3.30576700 | 2.31770400  |
| C  | -0.26163200 | 5.88141000 | -3.21073900 | H | -0.00686200 | -5.29524700 | 2.77228400  |
| C  | 0.46231900  | 6.55346000 | -2.23271500 | H | -2.31642500 | 0.26433500  | -3.22146500 |
| H  | 1.93072000  | 6.47443500 | -0.67314900 | H | -1.61674300 | -0.93881900 | -5.23977500 |
| H  | 2.32625700  | 4.03806100 | -0.97571700 | H | 1.73982800  | 0.46612600  | -2.10437500 |
| H  | -0.62452300 | 3.97026400 | -4.11216800 | H | 2.70093700  | -3.55004000 | -1.00003800 |
| H  | -0.98597800 | 6.42303600 | -3.80902700 | H | 4.26894600  | -1.38322600 | 0.08079000  |
| F  | 0.23467600  | 7.86362200 | -2.03778300 | H | 1.19423500  | -0.90582200 | 3.03403700  |
| C  | 1.05701800  | 2.39267500 | -2.78355800 | H | -1.57264900 | -0.51991300 | 2.46390900  |
| H  | 0.39004000  | 1.95928200 | -3.52717600 | H | -4.17786300 | -2.08608600 | -0.55902700 |
| C  | 1.97673900  | 1.57013300 | -2.20866900 | H | -4.81145500 | 0.33988400  | 0.05310800  |
| H  | 2.74011400  | 1.93666000 | -1.53058200 | H | -1.50857600 | 2.17323500  | -1.97605700 |
| H  | 2.12618400  | 0.56556500 | -2.59076100 | N | -5.59063900 | 4.17822800  | -2.43312200 |

### 8-ts-R

B3LYP-D3 SCF energy: -4539.839616 a.u.

B3LYP-D3 enthalpy: -4537.933400 a.u.

B3LYP-D3 free energy: -4538.186627 a.u.

M06 SCF energy in solution: -4538.810124 a.u.

Imaginary frequency: -98.89 cm<sup>-1</sup>

### Cartesian coordinates

| ATOM | X           | Y           | Z           |
|------|-------------|-------------|-------------|
| C    | -1.41261000 | -4.33349500 | -0.16374600 |
| C    | -0.65442600 | -3.17597100 | -0.43158500 |
| C    | 0.35639700  | -2.80342200 | 0.47697300  |
| C    | 0.58529100  | -3.57528500 | 1.62648600  |
| C    | -0.18857600 | -4.70602800 | 1.87825100  |
| C    | -1.18953100 | -5.09017200 | 0.98967200  |
| C    | -0.90923400 | -2.47299100 | -1.72816200 |
| C    | -1.54471700 | -1.21959200 | -1.84460900 |
| C    | -0.53480800 | -3.15635400 | -2.91132600 |
| C    | -1.80356000 | -0.68205300 | -3.11702900 |
| C    | -0.76545600 | -2.59521100 | -4.16983700 |
| C    | -1.41262300 | -1.36581000 | -4.26198900 |
| P    | 1.31155100  | -1.25924700 | 0.16869000  |

|   |             |             |             |
|---|-------------|-------------|-------------|
| P | -1.90046300 | -0.18295600 | -0.35316400 |
| C | 2.14834800  | -1.52058500 | -1.42415500 |
| C | 2.19746000  | -0.48388300 | -2.35160600 |
| C | 2.75050500  | -2.74750400 | -1.72666700 |
| C | 2.80100800  | -0.65281500 | -3.60291400 |
| C | 3.40485800  | -2.94429800 | -2.94243700 |
| C | 3.41899700  | -1.88882900 | -3.89512500 |
| C | 2.62087100  | -1.20159600 | 1.44088100  |
| C | 3.97196300  | -1.18389300 | 1.10436600  |
| C | 2.24907000  | -0.91223200 | 2.76206700  |
| C | 4.95868000  | -0.88369300 | 2.05351500  |
| C | 3.19790800  | -0.59194300 | 3.73320400  |
| C | 4.57065000  | -0.57199300 | 3.37478800  |
| C | -2.80221200 | -1.21535300 | 0.84475400  |
| C | -2.41240400 | -1.15055400 | 2.18655900  |
| C | -3.88046200 | -2.02514600 | 0.48366300  |
| C | -3.05654200 | -1.90019600 | 3.16939300  |
| C | -4.58857300 | -2.75393200 | 1.44804500  |
| C | -4.14487900 | -2.72454100 | 2.79072400  |
| C | -3.06253600 | 1.11264200  | -0.92686600 |
| C | -4.41474500 | 1.12136800  | -0.58426600 |
| C | -2.56626600 | 2.14900400  | -1.72987600 |
| C | -5.27457100 | 2.13753900  | -1.02504000 |
| C | -3.40170200 | 3.13688500  | -2.24958200 |
| C | -4.77489800 | 3.13574700  | -1.89217100 |
| H | 1.37461400  | -3.30576700 | 2.31770400  |
| H | -0.00686200 | -5.29524700 | 2.77228400  |
| H | -2.31642500 | 0.26433500  | -3.22146500 |
| H | -1.61674300 | -0.93881900 | -5.23977500 |
| H | 1.73982800  | 0.46612600  | -2.10437500 |
| H | 2.70093700  | -3.55004000 | -1.00003800 |
| H | 4.26894600  | -1.38322600 | 0.08079000  |
| H | 1.19423500  | -0.90582200 | 3.03403700  |
| H | -1.57264900 | -0.51991300 | 2.46390900  |
| H | -4.17786300 | -2.08608600 | -0.55902700 |
| H | -4.81145500 | 0.33988400  | 0.05310800  |
| H | -1.50857600 | 2.17323500  | -1.97605700 |
| N | -5.59063900 | 4.17822800  | -2.43312200 |
| C | -6.70366000 | 3.82642500  | -3.30101400 |
| H | -6.43253000 | 2.95259600  | -3.90064700 |
| H | -7.64757000 | 3.60209000  | -2.77617800 |
| H | -6.89900600 | 4.66022400  | -3.98758000 |
| C | -5.78633900 | 5.35136200  | -1.59595600 |
| H | -4.83485100 | 5.63472900  | -1.13424600 |
| H | -6.12636300 | 6.18923700  | -2.21659100 |
| H | -6.52617900 | 5.20700800  | -0.78780800 |
| N | -4.73885500 | -3.51759900 | 3.82381500  |
| N | 5.50697300  | -0.19665000 | 4.39226900  |
| N | 4.06722300  | -2.15997800 | -5.14584300 |
| C | -4.68415500 | -4.96544000 | 3.69416100  |
| H | -4.70713900 | -5.41695300 | 4.69440100  |
| H | -5.50975000 | -5.40879100 | 3.11158100  |
| H | -3.74137100 | -5.24759400 | 3.21520500  |
| C | -5.93538900 | -2.98708300 | 4.45936400  |
| H | -5.80714000 | -1.91588900 | 4.64541300  |
| H | -6.85708600 | -3.11985000 | 3.86468700  |
| H | -6.08562900 | -3.48538400 | 5.42484400  |
| C | 6.15060200  | 1.10146600  | 4.25721100  |
| H | 6.51495700  | 1.42626500  | 5.23988700  |
| H | 7.00656900  | 1.12188300  | 3.56019100  |
| H | 5.41497100  | 1.83310100  | 3.90805500  |

|   |             |             |             |    |             |             |             |
|---|-------------|-------------|-------------|----|-------------|-------------|-------------|
| C | 6.31863200  | -1.25673100 | 4.96978300  | H  | -3.15693600 | -6.52096100 | -0.53587300 |
| H | 7.16684800  | -1.58009700 | 4.34028200  | H  | -3.18195300 | -6.08188400 | -2.25807400 |
| H | 6.72716600  | -0.91583100 | 5.92897500  | H  | -1.63861900 | -6.56204200 | -1.48746400 |
| H | 5.68913400  | -2.13157900 | 5.16141900  | C  | -5.82604800 | -3.53355900 | 1.01517300  |
| C | 3.19158900  | -2.52647500 | -6.24692100 | H  | -6.33118100 | -3.89459700 | 1.91255600  |
| H | 2.63925200  | -1.67596900 | -6.68725400 | C  | -6.83006600 | -2.62976900 | 0.27490900  |
| H | 3.78389900  | -2.99095700 | -7.04457300 | H  | -6.43122000 | -2.28395300 | -0.68557000 |
| H | 2.45465900  | -3.25944700 | -5.90079900 | H  | -7.75468400 | -3.17973000 | 0.06680200  |
| C | 5.23066100  | -1.36813500 | -5.52068300 | H  | -7.08497200 | -1.74724000 | 0.87234100  |
| H | 5.80474200  | -1.11906500 | -4.62390400 | C  | -5.45364500 | -4.75698300 | 0.16008300  |
| H | 5.87358000  | -1.96509600 | -6.18044500 | H  | -4.91380000 | -4.45279300 | -0.74197800 |
| H | 4.99847600  | -0.42687300 | -6.04657600 | H  | -4.80594700 | -5.43980200 | 0.71962400  |
| C | -6.72454500 | 2.11362300  | -0.55204100 | H  | -6.35311200 | -5.30669800 | -0.14006100 |
| H | -7.18400500 | 3.06731500  | -0.81876800 | C  | -2.55605700 | -1.87991000 | 4.60883700  |
| C | -6.83249100 | 1.98192600  | 0.97928200  | H  | -3.41638700 | -2.06046000 | 5.25934200  |
| H | -6.46898600 | 1.00998000  | 1.33314900  | C  | -1.56447400 | -3.03844500 | 4.83262500  |
| H | -6.25482700 | 2.76251600  | 1.48648500  | H  | -0.69856100 | -2.93766000 | 4.16852200  |
| H | -7.87916200 | 2.07322800  | 1.29060000  | H  | -1.20651400 | -3.04836000 | 5.86871100  |
| C | -7.51543500 | 0.99309700  | -1.25436200 | H  | -2.03833000 | -4.00168500 | 4.62178200  |
| H | -8.56373100 | 1.00034400  | -0.93428100 | C  | -1.92656900 | -0.54002200 | 5.02049100  |
| H | -7.48961700 | 1.10644900  | -2.34297800 | H  | -0.97794300 | -0.35535800 | 4.50227500  |
| H | -7.09603800 | 0.01112500  | -1.00885000 | H  | -2.59542600 | 0.30329500  | 4.81259700  |
| C | -2.82125100 | 4.17208400  | -3.20424300 | H  | -1.70356300 | -0.54424800 | 6.09267200  |
| H | -3.65716400 | 4.79069900  | -3.54114600 | C  | 4.13450900  | -4.25537400 | -3.22205000 |
| C | -1.79834500 | 5.08457200  | -2.50503900 | H  | 3.95656500  | -4.51501500 | -4.27158800 |
| H | -0.91925500 | 4.51908300  | -2.17298700 | C  | 3.66263800  | -5.42796300 | -2.34678500 |
| H | -1.44504900 | 5.86424200  | -3.19011200 | H  | 3.99934100  | -5.31596200 | -1.30888200 |
| H | -2.23716700 | 5.57739400  | -1.62968000 | H  | 2.57290200  | -5.52085000 | -2.33132900 |
| C | -2.19513100 | 3.50158200  | -4.44205400 | H  | 4.08624400  | -6.36549100 | -2.72252100 |
| H | -1.33166000 | 2.87878800  | -4.17408200 | C  | 5.65609400  | -4.06561600 | -3.04963000 |
| H | -2.92225500 | 2.86279300  | -4.95574500 | H  | 5.88947600  | -3.76957600 | -2.01901900 |
| H | -1.84735700 | 4.25982100  | -5.15318600 | H  | 6.18577000  | -5.00233400 | -3.25910300 |
| C | 2.73137300  | -0.21445300 | 5.13184300  | H  | 6.04175800  | -3.29845800 | -3.72420600 |
| H | 3.63146000  | -0.00882400 | 5.71689800  | C  | 2.77737400  | 0.52151600  | -4.57688900 |
| C | 1.96646300  | -1.36438500 | 5.81036200  | H  | 3.09547200  | 0.16187900  | -5.55698700 |
| H | 1.04797300  | -1.61766800 | 5.26898100  | C  | 1.36227700  | 1.10302000  | -4.76088200 |
| H | 2.58211500  | -2.26918900 | 5.86457100  | H  | 0.98573100  | 1.56415300  | -3.84010800 |
| H | 1.68129400  | -1.08552100 | 6.83144500  | H  | 1.37207800  | 1.87875600  | -5.53517000 |
| C | 1.88792900  | 1.07575900  | 5.09758100  | H  | 0.64916200  | 0.32672100  | -5.05342100 |
| H | 1.60636500  | 1.38058000  | 6.11209800  | C  | 3.76477000  | 1.61731200  | -4.12875700 |
| H | 2.44352800  | 1.89604900  | 4.62911500  | H  | 3.48158500  | 2.02245600  | -3.15075600 |
| H | 0.96146100  | 0.93226500  | 4.52648000  | H  | 4.78400900  | 1.22553800  | -4.04851500 |
| C | 6.40914500  | -0.86041100 | 1.58473500  | H  | 3.77316000  | 2.44730600  | -4.84519600 |
| H | 7.04986900  | -0.66819400 | 2.44625100  | Rh | 0.03044700  | 0.74260100  | 0.53370300  |
| C | 6.83888900  | -2.21761700 | 0.99587100  | C  | 0.24687300  | 6.72419800  | 0.67438500  |
| H | 6.26834500  | -2.46488000 | 0.09264200  | C  | -0.07636100 | 5.37781100  | 0.79818200  |
| H | 7.89933400  | -2.19361700 | 0.72060900  | C  | 0.29155400  | 4.64316900  | 1.94091000  |
| H | 6.69087300  | -3.02744300 | 1.71873900  | C  | 1.00539800  | 5.30380800  | 2.96220300  |
| C | 6.63717000  | 0.28205500  | 0.57511600  | C  | 1.33168000  | 6.64943700  | 2.85606100  |
| H | 6.04140800  | 0.13373600  | -0.33332400 | C  | 0.94850400  | 7.33951400  | 1.70590000  |
| H | 6.35416700  | 1.24954500  | 1.00387400  | H  | -0.02338800 | 7.29525000  | -0.20680700 |
| H | 7.69211600  | 0.32992100  | 0.28146300  | H  | -0.61245300 | 4.89315500  | -0.00554000 |
| H | -1.78785300 | -5.97261300 | 1.18754800  | H  | 1.31411900  | 4.74553900  | 3.84250800  |
| H | -0.45832800 | -3.10837400 | -5.07249800 | H  | 1.87417800  | 7.17229700  | 3.63623000  |
| O | 0.04883900  | -4.37385000 | -2.73357400 | F  | 1.27233800  | 8.63767400  | 1.59135900  |
| O | -2.36661100 | -4.65430800 | -1.08575500 | C  | -0.00548700 | 3.21914200  | 2.07622000  |
| C | 0.34116400  | -5.15678200 | -3.88415700 | C  | -0.97573000 | 2.49408300  | 1.25986800  |
| H | 1.12879200  | -4.69286300 | -4.49134500 | C  | 2.37924300  | 3.53682300  | -0.08057100 |
| H | 0.69870000  | -6.11646600 | -3.50939300 | C  | 3.19873200  | 4.61905100  | 0.27270200  |
| H | -0.55398000 | -5.31676900 | -4.49835300 | C  | 3.41528400  | 5.65909700  | -0.63099700 |
| C | -2.59092900 | -6.03897300 | -1.34114300 | C  | 2.82081400  | 5.63101600  | -1.89501300 |



|    |             |            |             |   |             |             |             |
|----|-------------|------------|-------------|---|-------------|-------------|-------------|
| C  | 2.01130700  | 4.55171200 | -2.25295100 | H | 2.01002700  | -1.39471500 | 3.21518000  |
| C  | 1.79102200  | 3.50852800 | -1.35130800 | H | 0.86348400  | -2.81562700 | 4.86345900  |
| H  | 3.65063500  | 4.65799400 | 1.25885400  | H | -1.52420100 | 0.42423100  | 2.39477700  |
| H  | 4.04431200  | 6.49660500 | -0.34295800 | H | -3.90216200 | -2.47809000 | 0.35553900  |
| H  | 2.99184800  | 6.44197200 | -2.59695200 | H | -4.64189800 | 0.09439500  | -0.10314100 |
| H  | 1.54971600  | 4.51314600 | -3.23583800 | H | -1.43316200 | 0.51830000  | -2.91850800 |
| H  | 1.15843800  | 2.67703200 | -1.63693900 | H | 1.37683800  | -0.28580100 | -2.39155300 |
| Se | 2.10297300  | 2.15919500 | 1.27189600  | H | 3.08488300  | -3.47220800 | -0.08731500 |
| H  | 0.18908200  | 1.25079000 | -0.88155100 | H | 4.54954900  | -1.45935400 | 0.14569200  |
| H  | -1.43608000 | 3.06598400 | 0.45812900  | H | 1.96368700  | 1.08806200  | 2.42771600  |
| H  | 0.13954400  | 2.83538100 | 3.08450200  | N | 6.44808000  | 1.43290600  | 3.23878500  |
| H  | -1.74983500 | 2.02431400 | 1.88132400  | C | 7.23299300  | 0.59466000  | 4.13230900  |

### 9-R

B3LYP-D3 SCF energy: -4539.841021 a.u.

B3LYP-D3 enthalpy: -4537.933325 a.u.

B3LYP-D3 free energy: -4538.188356 a.u.

M06 SCF energy in solution: -4538.815303 a.u.

### Cartesian coordinates

| ATOM | X           | Y           | Z           |   |             |             |             |
|------|-------------|-------------|-------------|---|-------------|-------------|-------------|
| C    | -0.25239300 | -4.39324400 | -0.93435500 | N | 3.36048300  | -3.67629000 | -4.71929300 |
| C    | -0.58840500 | -3.17013100 | -0.31924800 | N | -5.40257200 | 2.53441400  | -3.97763500 |
| C    | -1.37176000 | -2.24329300 | -1.03857700 | N | -4.68639600 | -1.94227800 | 4.83728900  |
| C    | -1.79066900 | -2.54618300 | -2.34299600 | C | 2.82434600  | -4.99862600 | -5.00303100 |
| C    | -1.43213900 | -3.75533600 | -2.93519100 | H | 2.73370700  | -5.12369500 | -6.08979500 |
| C    | -0.66203500 | -4.68266500 | -2.23856300 | H | 3.43424900  | -5.83584200 | -4.62321700 |
| C    | -0.16743600 | -2.98629400 | 1.10648500  | H | 1.82424100  | -5.08195600 | -4.56649500 |
| C    | 0.85171500  | -2.10934800 | 1.53098100  | C | 4.69248200  | -3.41337600 | -5.24306000 |
| C    | -0.80101300 | -3.80268700 | 2.07506600  | H | 4.93734400  | -2.35493300 | -5.10843800 |
| C    | 1.21915200  | -2.05667900 | 2.88627500  | H | 5.48897800  | -4.00927500 | -4.76218700 |
| C    | -0.44528600 | -3.72554500 | 3.42428800  | H | 4.71126500  | -3.63428000 | -6.31721600 |
| C    | 0.57201900  | -2.85967800 | 3.81792300  | C | -5.74426700 | 3.87718400  | -3.53282200 |
| P    | -1.74399700 | -0.59894100 | -0.28452900 | H | -6.00146000 | 4.48989000  | -4.40574400 |
| P    | 1.62663500  | -0.90520600 | 0.36990900  | H | -6.59173700 | 3.92923600  | -2.82707100 |
| C    | -2.64937700 | -0.98285100 | 1.24722300  | H | -4.87326300 | 4.32804700  | -3.04669900 |
| C    | -2.32118700 | -0.30810100 | 2.41951900  | C | -6.40660900 | 1.84819100  | -4.77608400 |
| C    | -3.66119400 | -1.94938400 | 1.27039500  | H | -7.32834300 | 1.58495700  | -4.22713700 |
| C    | -2.96312200 | -0.58752900 | 3.63098500  | H | -6.69293800 | 2.48608900  | -5.62114100 |
| C    | -4.34630900 | -2.24381400 | 2.44933100  | H | -5.97965000 | 0.92404900  | -5.17882700 |
| C    | -3.98589900 | -1.56220200 | 3.64397100  | C | -3.98543600 | -2.86860900 | 5.71162000  |
| C    | -2.94296600 | 0.20565800  | -1.40908100 | H | -3.17423700 | -2.40615400 | 6.30362600  |
| C    | -4.26244600 | 0.46832900  | -1.04760400 | H | -4.69870100 | -3.31768500 | 6.41330500  |
| C    | -2.46510200 | 0.71061000  | -2.62666400 | H | -3.54409200 | -3.67334500 | 5.11375200  |
| C    | -5.11277700 | 1.21678700  | -1.87374600 | C | -5.50677800 | -0.95225200 | 5.52091200  |
| C    | -3.27379300 | 1.46721800  | -3.47474100 | H | -5.96593500 | -0.28823100 | 4.78333900  |
| C    | -4.61443100 | 1.73009300  | -3.09171700 | H | -6.31191200 | -1.46539600 | 6.06258800  |
| C    | 2.18513000  | -1.80774800 | -1.10710600 | H | -4.96368100 | -0.32673100 | 6.24912600  |
| C    | 1.91643200  | -1.22826100 | -2.35201900 | C | 6.90855500  | -0.66167900 | 1.11358200  |
| C    | 2.88974400  | -3.01022900 | -1.05047700 | H | 7.66560700  | -0.03479600 | 1.58704400  |
| C    | 2.30260700  | -1.84131600 | -3.54137500 | C | 7.12142000  | -0.54534800 | -0.40790700 |
| C    | 3.35739400  | -3.62511200 | -2.21967800 | H | 6.44312100  | -1.20112800 | -0.96635900 |
| C    | 3.02090200  | -3.06148400 | -3.47243100 | H | 6.95645400  | 0.48115200  | -0.75346900 |
| C    | 3.11778800  | -0.27175400 | 1.22266100  | H | 8.14607200  | -0.83406200 | -0.66793400 |
| C    | 4.40676600  | -0.70249000 | 0.90804300  | C | 7.13346800  | -2.10853600 | 1.59345700  |
| C    | 2.95911200  | 0.72376600  | 2.19432300  | H | 8.13603900  | -2.45530000 | 1.31784900  |
| C    | 5.53333200  | -0.15623800 | 1.53830000  | H | 7.03087600  | -2.18705300 | 2.68106500  |
| C    | 4.05012100  | 1.27610800  | 2.86326100  | H | 6.40589600  | -2.78952300 | 1.13684700  |
| C    | 5.35597100  | 0.83082100  | 2.53491000  | C | 3.80498800  | 2.37034300  | 3.89365600  |
| H    | -2.40669600 | -1.84636900 | -2.89480300 | H | 4.76638000  | 2.57102500  | 4.37396600  |
| H    | -1.75895800 | -3.97788900 | -3.94678500 | C | 3.33034100  | 3.66761400  | 3.20877700  |
|      |             |             |             | H | 2.36005200  | 3.52738300  | 2.71691200  |
|      |             |             |             | H | 3.21074000  | 4.47268100  | 3.94303800  |

|   |             |             |             |    |             |             |             |
|---|-------------|-------------|-------------|----|-------------|-------------|-------------|
| H | 4.05273200  | 4.00139400  | 2.45448300  | H  | -4.47590300 | -4.65845600 | 1.09029900  |
| C | 2.80579800  | 1.93134200  | 4.97950200  | H  | -6.18796700 | -5.02163700 | 1.39774100  |
| H | 1.80384300  | 1.75923400  | 4.56705700  | C  | -6.85027400 | -2.52671200 | 2.48876200  |
| H | 3.13114200  | 1.00647200  | 5.46873700  | H  | -6.97038700 | -1.88573800 | 1.60632300  |
| H | 2.71406300  | 2.70829800  | 5.74718000  | H  | -7.67269100 | -3.25155900 | 2.49246200  |
| C | -2.69295500 | 2.00476100  | -4.77523700 | H  | -6.94165100 | -1.90437300 | 3.38115600  |
| H | -3.48412000 | 2.58904700  | -5.25214800 | C  | -2.55066400 | 0.20499900  | 4.86854500  |
| C | -2.29770100 | 0.86082800  | -5.72694100 | H  | -2.95639700 | -0.29661300 | 5.74897700  |
| H | -1.50298900 | 0.23748200  | -5.30048600 | C  | -1.02392900 | 0.26700000  | 5.06067100  |
| H | -3.15381300 | 0.21090900  | -5.93997600 | H  | -0.53092100 | 0.83565900  | 4.26299300  |
| H | -1.92990400 | 1.26148500  | -6.67878500 | H  | -0.78464600 | 0.76266400  | 6.00843900  |
| C | -1.50096200 | 2.94562100  | -4.51563300 | H  | -0.58256100 | -0.73323900 | 5.06941600  |
| H | -1.13884100 | 3.37505500  | -5.45697900 | C  | -3.14573700 | 1.62695000  | 4.81695700  |
| H | -1.78185600 | 3.76555700  | -3.84548800 | H  | -2.75654500 | 2.18037200  | 3.95419300  |
| H | -0.66051100 | 2.40992900  | -4.05583700 | H  | -4.23657000 | 1.60284200  | 4.73130900  |
| C | -6.54383100 | 1.44647200  | -1.39929400 | H  | -2.88705100 | 2.18808100  | 5.72286200  |
| H | -7.07948700 | 2.00342400  | -2.16891000 | Rh | 0.22557700  | 0.80569800  | -0.23980600 |
| C | -7.29189900 | 0.11358100  | -1.20411900 | C  | 2.90447600  | 6.48547500  | -0.39983600 |
| H | -6.83367300 | -0.49345000 | -0.41417400 | C  | 2.48213200  | 5.15683900  | -0.37333500 |
| H | -8.33312000 | 0.29960900  | -0.91742200 | C  | 1.68794100  | 4.63127500  | -1.40350500 |
| H | -7.29079800 | -0.47924800 | -2.12547100 | C  | 1.31881700  | 5.47668700  | -2.46610500 |
| C | -6.57321400 | 2.29455400  | -0.11314600 | C  | 1.72341900  | 6.80645700  | -2.50343100 |
| H | -6.07421500 | 1.77848000  | 0.71568600  | C  | 2.51480500  | 7.29142800  | -1.46262800 |
| H | -6.06817500 | 3.25523900  | -0.26228000 | H  | 3.51962200  | 6.90226500  | 0.39034400  |
| H | -7.60723400 | 2.49384200  | 0.19079100  | H  | 2.77419600  | 4.53106700  | 0.46088500  |
| H | -0.38559900 | -5.62349400 | -2.70142600 | H  | 0.69340300  | 5.08645200  | -3.26581500 |
| H | -0.94458600 | -4.33659000 | 4.16584200  | H  | 1.44655800  | 7.46817200  | -3.31711400 |
| O | -1.75529500 | -4.65174800 | 1.60302300  | F  | 2.91049400  | 8.57589800  | -1.49081700 |
| O | 0.49589300  | -5.25706500 | -0.18679700 | C  | 1.18903500  | 3.22793600  | -1.38484500 |
| C | -2.32770800 | -5.59279100 | 2.50267300  | C  | 1.81269700  | 2.17159200  | -0.51759300 |
| H | -2.93722600 | -5.09434300 | 3.26705000  | C  | -0.60936000 | 4.11695200  | 0.99214500  |
| H | -2.97042900 | -6.23225700 | 1.89651100  | C  | -0.38435500 | 5.49779500  | 0.94476000  |
| H | -1.55607700 | -6.20520700 | 2.98606600  | C  | -0.18570600 | 6.20734300  | 2.13185700  |
| C | 0.22964600  | -6.64994000 | -0.33476100 | C  | -0.22939500 | 5.55114300  | 3.36300100  |
| H | 0.63933600  | -7.05157700 | -1.26854800 | C  | -0.48451400 | 4.17853300  | 3.40921000  |
| H | 0.72689100  | -7.14028900 | 0.50450800  | C  | -0.67451600 | 3.46183800  | 2.22689500  |
| H | -0.84886100 | -6.84206400 | -0.29205200 | H  | -0.35276000 | 6.01805800  | -0.00658500 |
| C | 4.23474000  | -4.86616400 | -2.09026700 | H  | 0.00376400  | 7.27593900  | 2.08799600  |
| H | 4.63901600  | -5.10133500 | -3.07634000 | H  | -0.07558800 | 6.10784900  | 4.28282700  |
| C | 5.44135100  | -4.60753200 | -1.16735400 | H  | -0.53602300 | 3.65949700  | 4.36212500  |
| H | 5.12944800  | -4.44191300 | -0.12976100 | H  | -0.88359300 | 2.40099100  | 2.26706400  |
| H | 6.11529200  | -5.47149000 | -1.17263000 | Se | -0.87784700 | 3.15272700  | -0.69957000 |
| H | 6.00981500  | -3.72899900 | -1.49270800 | H  | 0.22437700  | 1.09695600  | 1.24388700  |
| C | 3.42547300  | -6.08269800 | -1.60843000 | H  | 2.16895700  | 2.55609000  | 0.43653000  |
| H | 2.97159300  | -5.88614400 | -0.63208600 | H  | 1.01887000  | 2.87225800  | -2.40533600 |
| H | 2.61701900  | -6.31524700 | -2.30938600 | H  | 2.64323600  | 1.67125700  | -1.03182000 |
| H | 4.06890700  | -6.96575400 | -1.52218800 |    |             |             |             |
| C | 1.90241000  | -1.24163000 | -4.88457500 |    |             |             |             |
| H | 2.69810900  | -1.46930100 | -5.59994600 |    |             |             |             |
| C | 0.61714900  | -1.92172700 | -5.39677100 |    |             |             |             |
| H | -0.20640900 | -1.76617600 | -4.69062000 |    |             |             |             |
| H | 0.32191300  | -1.50989900 | -6.36887500 |    |             |             |             |
| H | 0.76543200  | -2.99932800 | -5.50937200 |    |             |             |             |
| C | 1.72361800  | 0.28460100  | -4.84906200 |    |             |             |             |
| H | 0.84272400  | 0.57930400  | -4.26466800 |    |             |             |             |
| H | 2.59851400  | 0.78846100  | -4.42169700 |    |             |             |             |
| H | 1.56963900  | 0.66696100  | -5.86353700 |    |             |             |             |
| C | -5.49045700 | -3.25422200 | 2.44374700  |    |             |             |             |
| H | -5.40932300 | -3.84716000 | 3.36179600  |    |             |             |             |
| C | -5.46379100 | -4.21459800 | 1.24335700  |    |             |             |             |
| H | -5.74461200 | -3.70409100 | 0.31390800  |    |             |             |             |

### 10-ts-R

B3LYP-D3 SCF energy: -4539.831862 a.u.

B3LYP-D3 enthalpy: -4537.925575 a.u.

B3LYP-D3 free energy: -4538.177978 a.u.

M06 SCF energy in solution: -4538.807230 a.u

Imaginary frequency: -865.03 cm<sup>-1</sup>

### Cartesian coordinates

| ATOM | X          | Y           | Z          |
|------|------------|-------------|------------|
| C    | 1.08731600 | -1.19876500 | 3.97690600 |
| C    | 1.28006800 | -1.17881200 | 2.57509100 |
| C    | 1.88364000 | -0.03949500 | 1.99958100 |
| C    | 2.29256600 | 1.02596100  | 2.81857700 |
| C    | 2.09070100 | 0.97963400  | 4.19352300 |

|   |             |             |             |   |             |             |             |
|---|-------------|-------------|-------------|---|-------------|-------------|-------------|
| C | 1.48037300  | -0.12530900 | 4.77910600  | C | 7.06082800  | 4.87514200  | 0.21360400  |
| C | 0.89097400  | -2.42274800 | 1.83333500  | H | 7.94624400  | 4.35061000  | -0.18408200 |
| C | -0.21760700 | -2.52406600 | 0.96606200  | H | 7.33341900  | 5.93013900  | 0.34469600  |
| C | 1.62695700  | -3.59390500 | 2.12332200  | H | 6.83617500  | 4.45996100  | 1.20064800  |
| C | -0.57081000 | -3.76864300 | 0.42244800  | C | 3.86058500  | -6.14584200 | -1.82520400 |
| C | 1.28258400  | -4.82420300 | 1.55762700  | H | 3.12197200  | -6.35653200 | -2.61838900 |
| C | 0.17752000  | -4.90497500 | 0.71504600  | H | 4.56155700  | -6.98962400 | -1.79391700 |
| P | 2.03890800  | 0.13931000  | 0.16862500  | H | 3.32725000  | -6.10963300 | -0.86993600 |
| P | -1.09821800 | -0.99702500 | 0.41605700  | C | 5.42905400  | -4.82146100 | -3.19696300 |
| C | 2.83630500  | -1.38530000 | -0.44618900 | H | 6.07078100  | -3.93664900 | -3.13225300 |
| C | 2.28227100  | -2.00245600 | -1.56952300 | H | 6.07513900  | -5.70560500 | -3.25792600 |
| C | 3.99040800  | -1.92780700 | 0.12835600  | H | 4.85696000  | -4.75763000 | -4.14009300 |
| C | 2.83587600  | -3.15751800 | -2.12620000 | C | -6.44995500 | -1.30824500 | 0.22728000  |
| C | 4.60114200  | -3.05857900 | -0.42275300 | H | -7.19822100 | -1.24513400 | -0.56750400 |
| C | 3.99824800  | -3.70045300 | -1.53469000 | C | -6.48406300 | 0.00608400  | 1.02229800  |
| C | 3.23275300  | 1.50558900  | -0.10251500 | H | -5.83544000 | -0.02557300 | 1.90597800  |
| C | 4.52602100  | 1.28220900  | -0.57372500 | H | -6.16902100 | 0.85178700  | 0.40469500  |
| C | 2.82346400  | 2.82513900  | 0.14300500  | H | -7.50297000 | 0.19754900  | 1.37738000  |
| C | 5.41863800  | 2.34118400  | -0.79476600 | C | -6.83609100 | -2.49937400 | 1.12784700  |
| C | 3.69641400  | 3.90203200  | -0.01495200 | H | -7.81489700 | -2.33179200 | 1.59247800  |
| C | 5.01361400  | 3.65705700  | -0.48463600 | H | -6.88676400 | -3.42977300 | 0.55314300  |
| C | -1.59287500 | -0.12759000 | 1.94632300  | H | -6.09836600 | -2.63370400 | 1.92853700  |
| C | -1.41936100 | 1.25397100  | 2.03880800  | C | -3.66752800 | -3.30064600 | -3.59816400 |
| C | -2.22415400 | -0.80659800 | 2.99242700  | H | -4.65753900 | -3.36502800 | -4.05146800 |
| C | -1.84780400 | 1.96810900  | 3.15963700  | C | -2.76184400 | -2.58002800 | -4.61235600 |
| C | -2.71745300 | -0.12184600 | 4.10780200  | H | -1.72393900 | -2.51634600 | -4.26636200 |
| C | -2.49776800 | 1.27425600  | 4.20820700  | H | -2.75787100 | -3.12392600 | -5.56381100 |
| C | -2.67486600 | -1.54592900 | -0.34831000 | H | -3.11055400 | -1.55954700 | -4.80141800 |
| C | -3.92036000 | -1.24899100 | 0.21010600  | C | -3.17541600 | -4.74036100 | -3.34846600 |
| C | -2.63219600 | -2.18284300 | -1.59499100 | H | -2.17272400 | -4.73823800 | -2.90465000 |
| C | -5.10983200 | -1.58882200 | -0.44192500 | H | -3.84461600 | -5.27508400 | -2.66603900 |
| C | -3.79713800 | -2.55112300 | -2.27573500 | H | -3.12563400 | -5.30142800 | -4.28893300 |
| C | -5.04992000 | -2.25279700 | -1.69013000 | C | 3.26346700  | 5.30412800  | 0.39431500  |
| H | 2.78095000  | 1.89091900  | 2.39049100  | H | 3.96912200  | 6.00153000  | -0.06325500 |
| H | 2.41423000  | 1.81013000  | 4.81447400  | C | 3.39327200  | 5.45478700  | 1.92373700  |
| H | -1.43825400 | -3.85901100 | -0.21857200 | H | 2.72370100  | 4.75595500  | 2.44165600  |
| H | -0.10662500 | -5.86281600 | 0.28841300  | H | 4.41775900  | 5.25118100  | 2.25363200  |
| H | 1.38592900  | -1.57901000 | -2.01852100 | H | 3.12917300  | 6.47149900  | 2.23745800  |
| H | 4.41529900  | -1.46680000 | 1.01514000  | C | 1.84779300  | 5.67687600  | -0.07023700 |
| H | 4.85322700  | 0.27177000  | -0.78594300 | H | 1.65259400  | 6.73519400  | 0.13604300  |
| H | 1.81215600  | 3.01165100  | 0.49165400  | H | 1.71499000  | 5.51223600  | -1.14469800 |
| H | -0.91394500 | 1.77244400  | 1.22981600  | H | 1.07855300  | 5.10244200  | 0.45926100  |
| H | -2.35535200 | -1.88257000 | 2.92526700  | C | 6.80777800  | 2.01464800  | -1.33298200 |
| H | -3.97133700 | -0.73917000 | 1.16268400  | H | 7.29099000  | 2.95027500  | -1.62035800 |
| H | -1.67039000 | -2.39330200 | -2.05360900 | C | 7.67241800  | 1.35302900  | -0.24216700 |
| N | -6.29725700 | -2.57430300 | -2.31792900 | H | 7.23067700  | 0.40398900  | 0.08032300  |
| N | -2.90220800 | 2.03955400  | 5.34782200  | H | 8.67970700  | 1.14428000  | -0.62069500 |
| N | 5.87486300  | 4.79190900  | -0.62469300 | H | 7.76474100  | 1.99626700  | 0.63899300  |
| N | 4.60725800  | -4.91000400 | -2.00042400 | C | 6.75124700  | 1.13500700  | -2.59635400 |
| C | -2.29787200 | 1.73099400  | 6.63350800  | H | 6.35433700  | 0.13578300  | -2.38180700 |
| H | -2.31458700 | 2.62936400  | 7.26401500  | H | 6.12073100  | 1.58947100  | -3.36860600 |
| H | -2.79356700 | 0.92217000  | 7.19754600  | H | 7.75814100  | 1.00565100  | -3.00885300 |
| H | -1.25268900 | 1.44559800  | 6.47782400  | H | 1.32025100  | -0.15315600 | 5.85057200  |
| C | -4.28367000 | 2.49144400  | 5.38416100  | H | 1.86295100  | -5.71164500 | 1.78232800  |
| H | -4.57404100 | 2.85608500  | 4.39360700  | O | 2.67788600  | -3.44891100 | 2.98192300  |
| H | -5.00613800 | 1.71031100  | 5.68300100  | O | 0.49690300  | -2.31781700 | 4.48651800  |
| H | -4.37707000 | 3.32288000  | 6.09349900  | C | 3.02507400  | -4.56673300 | 3.79521900  |
| C | 6.00365900  | 5.34850800  | -1.96247300 | H | 3.54207100  | -5.34653300 | 3.22575200  |
| H | 6.41217100  | 6.36400900  | -1.89457200 | H | 3.70562400  | -4.18120500 | 4.55690300  |
| H | 6.65972400  | 4.76528000  | -2.63357100 | H | 2.13329800  | -4.99043900 | 4.27257700  |
| H | 5.01479100  | 5.41081500  | -2.42885700 | C | 0.78655300  | -2.66637700 | 5.83671000  |

|    |             |             |             |
|----|-------------|-------------|-------------|
| H  | 0.29248200  | -1.99849500 | 6.55058500  |
| H  | 0.39432600  | -3.67566600 | 5.97434400  |
| H  | 1.86850600  | -2.65916800 | 6.01693500  |
| C  | -3.50128300 | -0.90596600 | 5.15659000  |
| H  | -3.94154900 | -0.19387500 | 5.85677200  |
| C  | -4.67177900 | -1.68489300 | 4.52652900  |
| H  | -4.32259100 | -2.46170800 | 3.83681200  |
| H  | -5.26226600 | -2.17807300 | 5.30690300  |
| H  | -5.33657400 | -1.01646700 | 3.96921700  |
| C  | -2.58148200 | -1.84286300 | 5.95818200  |
| H  | -2.06497600 | -2.54594700 | 5.29617600  |
| H  | -1.81963500 | -1.26828800 | 6.49493800  |
| H  | -3.15680000 | -2.41676800 | 6.69370400  |
| C  | -1.61911900 | 3.47274700  | 3.21097900  |
| H  | -1.93761100 | 3.80835100  | 4.20152900  |
| C  | -0.13343100 | 3.83294900  | 3.04084700  |
| H  | 0.24303100  | 3.52515200  | 2.05821000  |
| H  | 0.01353600  | 4.91572000  | 3.12731600  |
| H  | 0.48423400  | 3.33638500  | 3.79540100  |
| C  | -2.47924500 | 4.19735500  | 2.15818500  |
| H  | -2.20354600 | 3.89816600  | 1.13951200  |
| H  | -3.54390400 | 3.97571300  | 2.29587100  |
| H  | -2.34974500 | 5.28371000  | 2.23296200  |
| C  | 5.89013700  | -3.59435200 | 0.18624100  |
| H  | 6.28476600  | -4.33751000 | -0.51080200 |
| C  | 5.60553900  | -4.31303400 | 1.51546800  |
| H  | 5.15149300  | -3.62782600 | 2.23886600  |
| H  | 4.91140100  | -5.14643400 | 1.35859400  |
| H  | 6.53025000  | -4.71419900 | 1.94640800  |
| C  | 6.94988000  | -2.49436200 | 0.36603000  |
| H  | 6.64578000  | -1.74865600 | 1.11053400  |
| H  | 7.89456500  | -2.93054300 | 0.70976300  |
| H  | 7.14235500  | -1.96999900 | -0.57692700 |
| C  | 2.14779600  | -3.77716000 | -3.33821100 |
| H  | 2.77999300  | -4.57938000 | -3.72164400 |
| C  | 0.79469900  | -4.39677600 | -2.94316400 |
| H  | 0.11906800  | -3.63020700 | -2.54763000 |
| H  | 0.31119200  | -4.86023800 | -3.81072400 |
| H  | 0.91453000  | -5.15479200 | -2.16300000 |
| C  | 1.96911900  | -2.75982800 | -4.48159100 |
| H  | 1.27964500  | -1.95316200 | -4.20300700 |
| H  | 2.92540200  | -2.30409600 | -4.76054100 |
| H  | 1.55290200  | -3.25416100 | -5.36656300 |
| Rh | 0.12498400  | 0.40595900  | -1.06558800 |
| Se | -1.59875300 | 0.63420500  | -2.99690200 |
| C  | -3.25181000 | 1.46502000  | -2.38111400 |
| C  | -4.33887000 | 1.49280100  | -3.26033200 |
| C  | -3.34383600 | 2.04327200  | -1.11331500 |
| C  | -5.52216200 | 2.12302300  | -2.86948700 |
| H  | -4.26328900 | 1.03322600  | -4.24122700 |
| C  | -4.52262300 | 2.68757100  | -0.73898900 |
| H  | -2.50459700 | 1.99331700  | -0.43126300 |
| C  | -5.60994800 | 2.73105000  | -1.61506200 |
| H  | -6.36781700 | 2.14951700  | -3.55083400 |
| H  | -4.58870300 | 3.14929700  | 0.24119300  |
| H  | -6.52670600 | 3.23195200  | -1.31783200 |
| H  | 0.27932100  | 1.94605700  | -0.93339100 |
| C  | -1.60490800 | 5.35399400  | -1.41141600 |
| C  | -0.87785100 | 4.21018400  | -1.73638100 |
| C  | -1.02862500 | 3.57827900  | -2.97936500 |
| C  | -1.94285700 | 4.12869400  | -3.89529100 |

|   |             |             |             |
|---|-------------|-------------|-------------|
| C | -2.68855100 | 5.26074400  | -3.58456600 |
| C | -2.50975500 | 5.85617100  | -2.33850200 |
| H | -1.48328800 | 5.84936100  | -0.45455100 |
| H | -0.18297600 | 3.81927600  | -1.00442400 |
| H | -2.08213900 | 3.65085800  | -4.86180300 |
| H | -3.39951000 | 5.68677800  | -4.28398200 |
| F | -3.22801100 | 6.94961700  | -2.02728200 |
| C | -0.31896100 | 2.31671400  | -3.33690500 |
| H | -0.14385000 | 2.26541900  | -4.41424100 |
| C | 0.88051000  | 1.88060000  | -2.51302100 |
| H | 1.52531900  | 2.71558000  | -2.22618100 |
| H | 1.50290800  | 1.15423600  | -3.04957200 |
| C | -6.66948400 | -3.97350400 | -2.45475600 |
| H | -6.33319400 | -4.52610000 | -1.57253100 |
| H | -7.76298900 | -4.05208100 | -2.50648500 |
| H | -6.25834500 | -4.47679000 | -3.34736500 |
| C | -6.71601800 | -1.69603200 | -3.39811400 |
| H | -6.53770700 | -0.65555600 | -3.10756100 |
| H | -6.19485400 | -1.87490900 | -4.35717800 |
| H | -7.79099700 | -1.82483600 | -3.57480900 |

### 11-R

B3LYP-D3 SCF energy: -4539.874368 a.u.

B3LYP-D3 enthalpy: -4537.961762 a.u.

B3LYP-D3 free energy: -4538.216709 a.u.

M06 SCF energy in solution: -4538.849377 a.u.

### Cartesian coordinates

| ATOM | X           | Y           | Z           |
|------|-------------|-------------|-------------|
| C    | 2.36130100  | -3.63413600 | 1.22534200  |
| C    | 1.48978700  | -2.52056200 | 1.24827900  |
| C    | 0.46179100  | -2.44501300 | 0.28274900  |
| C    | 0.30731100  | -3.48510000 | -0.64788700 |
| C    | 1.16455600  | -4.58157600 | -0.63502700 |
| C    | 2.19798300  | -4.66170400 | 0.29281800  |
| C    | 1.74119700  | -1.50756400 | 2.32239100  |
| C    | 2.25804700  | -0.22668200 | 2.05173800  |
| C    | 1.55609800  | -1.88902500 | 3.66999800  |
| C    | 2.61440300  | 0.63835500  | 3.09605600  |
| C    | 1.89247800  | -1.01508200 | 4.70975700  |
| C    | 2.43753500  | 0.23358500  | 4.41550500  |
| P    | -0.63550100 | -0.94845700 | 0.17667100  |
| P    | 2.27551600  | 0.35158700  | 0.31392700  |
| C    | -1.31996300 | -0.80614100 | 1.86698800  |
| C    | -1.35911100 | 0.43344600  | 2.50253200  |
| C    | -1.77282200 | -1.94321700 | 2.54693600  |
| C    | -1.81817500 | 0.56383800  | 3.81852600  |
| C    | -2.29812900 | -1.84830800 | 3.83497700  |
| C    | -2.31488700 | -0.58194400 | 4.47880200  |
| C    | -2.01353400 | -1.51057600 | -0.90297500 |
| C    | -3.25045900 | -1.90984200 | -0.39455200 |
| C    | -1.79753800 | -1.59131200 | -2.28578100 |
| C    | -4.26630800 | -2.39445500 | -1.22824500 |
| C    | -2.76228600 | -2.12603100 | -3.14542600 |
| C    | -4.01053400 | -2.54020700 | -2.61144300 |
| C    | 3.36030800  | -0.75904000 | -0.62668600 |
| C    | 2.96709200  | -1.13232500 | -1.91508700 |
| C    | 4.58400600  | -1.19586500 | -0.12039800 |
| C    | 3.76816200  | -1.96176500 | -2.69922100 |
| C    | 5.43486600  | -1.99665100 | -0.89184100 |
| C    | 5.00495700  | -2.41339200 | -2.17327800 |

|   |             |             |             |   |             |             |             |
|---|-------------|-------------|-------------|---|-------------|-------------|-------------|
| C | 3.01154700  | 2.01835800  | 0.26043400  | H | 8.06841700  | 3.36459700  | -1.10152600 |
| C | 4.19220000  | 2.30815600  | -0.42628800 | H | 7.20530100  | 3.45827300  | 0.44663900  |
| C | 2.25282200  | 3.07516700  | 0.79317300  | H | 6.99254600  | 2.05005900  | -0.60598800 |
| C | 4.63662100  | 3.62657000  | -0.57664800 | C | 1.79103400  | 5.50702700  | 1.24513400  |
| C | 2.64957200  | 4.40517600  | 0.64025600  | H | 2.15996200  | 6.45228700  | 0.83805100  |
| C | 3.85418400  | 4.68536500  | -0.05179600 | C | 0.30318900  | 5.36646400  | 0.87196700  |
| H | -0.48796800 | -3.45298000 | -1.38051300 | H | -0.15400900 | 4.47471700  | 1.31881200  |
| H | 1.02971200  | -5.37819300 | -1.36068900 | H | -0.25890800 | 6.23412100  | 1.23611100  |
| H | 3.02425400  | 1.61848800  | 2.88212900  | H | 0.16724800  | 5.29927700  | -0.21303700 |
| H | 2.71967500  | 0.89783500  | 5.22746200  | C | 1.97073300  | 5.54713000  | 2.77566800  |
| H | -0.99192200 | 1.30360800  | 1.96753300  | H | 1.63736500  | 4.60842600  | 3.23543400  |
| H | -1.70575000 | -2.90940200 | 2.06074100  | H | 3.02062700  | 5.70139600  | 3.04836700  |
| H | -3.43879100 | -1.83920100 | 0.67015100  | H | 1.38262900  | 6.36268700  | 3.21228300  |
| H | -0.83961600 | -1.27066100 | -2.68954700 | C | -2.43830000 | -2.29124300 | -4.62405000 |
| H | 2.00803300  | -0.78276000 | -2.28358600 | H | -3.33290600 | -2.70287300 | -5.09763100 |
| H | 4.88098100  | -0.90851400 | 0.88422100  | C | -1.29381700 | -3.30328000 | -4.81951800 |
| H | 4.77730700  | 1.49608000  | -0.84515000 | H | -0.36280600 | -2.95059600 | -4.36173100 |
| H | 1.34359800  | 2.85075500  | 1.34446100  | H | -1.54290200 | -4.27169000 | -4.37096400 |
| N | 4.22329500  | 6.06264900  | -0.18682800 | H | -1.09931000 | -3.46250900 | -5.88637200 |
| C | 5.29183300  | 6.54782700  | 0.67386200  | C | -2.11234300 | -0.94838200 | -5.29925100 |
| H | 5.15479400  | 6.14804400  | 1.68346700  | H | -1.94529400 | -1.09224900 | -6.37256600 |
| H | 6.30883300  | 6.27841600  | 0.33720800  | H | -2.93424400 | -0.23426600 | -5.17569300 |
| H | 5.23870300  | 7.64174100  | 0.73240500  | H | -1.20392000 | -0.49514400 | -4.88344100 |
| C | 4.16035900  | 6.64614100  | -1.51853700 | C | -5.60236200 | -2.76159100 | -0.59174300 |
| H | 3.25292700  | 6.29854900  | -2.02251400 | H | -6.32374600 | -2.94172100 | -1.39098100 |
| H | 4.10036700  | 7.73767100  | -1.42774900 | C | -5.47835200 | -4.05407100 | 0.23893600  |
| H | 5.02160000  | 6.41227800  | -2.16839800 | H | -4.76375600 | -3.91969000 | 1.06043000  |
| N | 5.76569400  | -3.30680300 | -2.99579100 | H | -6.44526300 | -4.32759500 | 0.67627500  |
| N | -4.96636200 | -3.08826300 | -3.52237200 | H | -5.13005700 | -4.89185100 | -0.37371700 |
| N | -2.83674800 | -0.54792700 | 5.81467700  | C | -6.16419500 | -1.61491500 | 0.27060600  |
| C | 6.00922200  | -4.65249300 | -2.50041100 | H | -5.55761900 | -1.45409200 | 1.16992900  |
| H | 6.15319300  | -5.32913700 | -3.35269200 | H | -6.19699900 | -0.67174500 | -0.28559200 |
| H | 6.89210200  | -4.75260100 | -1.84572400 | H | -7.18028700 | -1.85560400 | 0.60218900  |
| H | 5.13279500  | -4.99346000 | -1.94053100 | H | 2.86951300  | -5.51232400 | 0.28726000  |
| C | 6.84347800  | -2.72096700 | -3.77782600 | H | 1.74704100  | -1.30314100 | 5.74361100  |
| H | 6.49956500  | -1.78553400 | -4.23099300 | O | 1.05370400  | -3.13808800 | 3.87139900  |
| H | 7.75565600  | -2.50001200 | -3.19448400 | O | 3.36106000  | -3.62613100 | 2.15074200  |
| H | 7.12168600  | -3.40877000 | -4.58570200 | C | 0.99469800  | -3.63819500 | 5.20085200  |
| C | -5.97163700 | -2.17632500 | -4.04372800 | H | 0.26855400  | -3.08118200 | 5.80670900  |
| H | -6.42181500 | -2.60741300 | -4.94577800 | H | 0.66560900  | -4.67461500 | 5.11615100  |
| H | -6.78947800 | -1.95688900 | -3.33215900 | H | 1.97919300  | -3.60573600 | 5.68452000  |
| H | -5.50362400 | -1.22571100 | -4.31675100 | C | 3.90865400  | -4.87525300 | 2.55792800  |
| C | -5.39022700 | -4.46878700 | -3.34635900 | H | 4.53672500  | -5.32201600 | 1.77864500  |
| H | -6.23127800 | -4.60907400 | -2.64644300 | H | 4.53135500  | -4.65760400 | 3.42749100  |
| H | -5.69904500 | -4.87455600 | -4.31808000 | H | 3.11287800  | -5.57724200 | 2.83629600  |
| H | -4.54561400 | -5.06337000 | -2.98595200 | C | 6.79384600  | -2.37471200 | -0.31205800 |
| C | -1.85318000 | -0.57946200 | 6.88509000  | H | 7.37585900  | -2.86896100 | -1.09170500 |
| H | -1.33200200 | 0.38158200  | 7.04767900  | C | 7.59321300  | -1.12766700 | 0.11311100  |
| H | -2.34541000 | -0.85808600 | 7.82483500  | H | 7.11322700  | -0.59813300 | 0.94396600  |
| H | -1.09359700 | -1.33596100 | 6.66094800  | H | 8.59805400  | -1.41515100 | 0.44250400  |
| C | -4.01466700 | 0.26500900  | 6.08255300  | H | 7.69604600  | -0.42309300 | -0.72006600 |
| H | -4.67610200 | 0.24216100  | 5.21166000  | C | 6.64110600  | -3.36449100 | 0.85729300  |
| H | -4.55948400 | -0.16223100 | 6.93447800  | H | 6.01008000  | -2.94527600 | 1.64872100  |
| H | -3.80344600 | 1.32118300  | 6.31936500  | H | 6.17288400  | -4.29417400 | 0.51704600  |
| C | 5.95604600  | 3.85545200  | -1.30689500 | H | 7.61820500  | -3.61217100 | 1.28777300  |
| H | 6.18062200  | 4.92242100  | -1.29067000 | C | 3.28717600  | -2.42388500 | -4.07006400 |
| C | 5.85539200  | 3.42805500  | -2.78377700 | H | 4.17179800  | -2.58137800 | -4.69396200 |
| H | 5.65320000  | 2.35413400  | -2.87432000 | C | 2.57169000  | -3.78309200 | -3.94257600 |
| H | 5.05030000  | 3.96575600  | -3.29673500 | H | 1.69730900  | -3.69513300 | -3.28836700 |
| H | 6.79495500  | 3.63723500  | -3.30781300 | H | 2.23496100  | -4.13865500 | -4.92359600 |
| C | 7.12164600  | 3.13875000  | -0.59798100 | H | 3.23959200  | -4.53625400 | -3.51402300 |

|    |             |             |             |
|----|-------------|-------------|-------------|
| C  | 2.38408300  | -1.40248800 | -4.78035600 |
| H  | 1.41508000  | -1.28931000 | -4.27831800 |
| H  | 2.85356700  | -0.41329400 | -4.83007300 |
| H  | 2.17703200  | -1.73515500 | -5.80330300 |
| C  | -2.88380000 | -3.07996200 | 4.51914900  |
| H  | -2.60056500 | -3.03771500 | 5.57656600  |
| C  | -2.37782200 | -4.41031300 | 3.93798600  |
| H  | -2.80377800 | -4.60505200 | 2.94549500  |
| H  | -1.28846400 | -4.42662900 | 3.83881200  |
| H  | -2.68333000 | -5.23918700 | 4.58552000  |
| C  | -4.42489200 | -3.03850400 | 4.45779800  |
| H  | -4.76671400 | -3.04366000 | 3.41475800  |
| H  | -4.85406100 | -3.91554400 | 4.95634400  |
| H  | -4.81793800 | -2.14314900 | 4.94456400  |
| C  | -1.76568500 | 1.94294500  | 4.47128900  |
| H  | -1.97129400 | 1.82587100  | 5.53668100  |
| C  | -0.37201600 | 2.58672400  | 4.35928400  |
| H  | -0.10843300 | 2.80079200  | 3.31727800  |
| H  | -0.35156800 | 3.53797300  | 4.90340200  |
| H  | 0.40237200  | 1.93220900  | 4.76755400  |
| C  | -2.83702200 | 2.87627000  | 3.87962900  |
| H  | -2.66488700 | 3.04158200  | 2.81086700  |
| H  | -3.84070000 | 2.45514400  | 3.98760500  |
| H  | -2.81784300 | 3.85111300  | 4.38102400  |
| Rh | 0.28278000  | 0.94937100  | -0.50090400 |
| C  | -3.73199700 | 1.62899200  | 0.39271900  |
| C  | -3.08172700 | 2.75545700  | -0.11556400 |
| C  | -3.56107600 | 4.04000300  | 0.15969500  |
| C  | -4.70346000 | 4.19356300  | 0.94875800  |
| C  | -5.36568800 | 3.07067000  | 1.44823500  |
| C  | -4.87671100 | 1.79220500  | 1.17326900  |
| H  | -3.36252200 | 0.63706300  | 0.17188100  |
| H  | -3.05321800 | 4.91030600  | -0.24381700 |
| H  | -5.07798000 | 5.19024000  | 1.16334500  |
| H  | -6.25819700 | 3.19246200  | 2.05522500  |
| H  | -5.38333200 | 0.91640400  | 1.56616400  |
| Se | -1.52780300 | 2.60031900  | -1.29797300 |
| C  | -2.40234900 | 1.85407200  | -3.04892900 |
| H  | -2.22952600 | 0.78441900  | -2.94711600 |
| C  | -1.57127900 | 2.42305200  | -4.19364300 |
| H  | -1.93388200 | 2.01133500  | -5.14175100 |
| H  | -1.63147700 | 3.51363100  | -4.24797100 |
| H  | -0.51640900 | 2.14541700  | -4.08716700 |
| C  | -3.86869300 | 2.13038600  | -3.07046200 |
| C  | -4.75836700 | 1.10965600  | -2.69951200 |
| C  | -4.39220600 | 3.38964200  | -3.40401100 |
| C  | -6.13472400 | 1.32474300  | -2.67797700 |
| H  | -4.36877400 | 0.13652500  | -2.42001600 |
| C  | -5.76479500 | 3.62345400  | -3.38132900 |
| H  | -3.72432300 | 4.20162600  | -3.67495100 |
| C  | -6.61659500 | 2.58391200  | -3.01700900 |
| H  | -6.83020600 | 0.53915900  | -2.40275800 |
| H  | -6.18382900 | 4.59075400  | -3.63683100 |
| F  | -7.94331900 | 2.80531200  | -2.99252500 |

## 12-R

B3LYP-D3 SCF energy: -650.391938 a.u.

B3LYP-D3 enthalpy: -650.145789 a.u.

B3LYP-D3 free energy: -650.206444 a.u.

M06 SCF energy in solution: -650.183171 a.u.

## Cartesian coordinates

| ATOM | X           | Y           | Z           |
|------|-------------|-------------|-------------|
| C    | 2.31358300  | -1.42413500 | -0.69553200 |
| C    | 1.58365900  | -0.73039400 | 0.27618200  |
| C    | 0.64142400  | -1.40799800 | 1.05844300  |
| C    | 0.42982700  | -2.77457700 | 0.86573300  |
| C    | 1.15782400  | -3.46771500 | -0.10373900 |
| C    | 2.10005400  | -2.79206800 | -0.88269400 |
| H    | 3.04367400  | -0.89558400 | -1.30096900 |
| H    | 0.06452300  | -0.86392800 | 1.79878600  |
| H    | -0.30810400 | -3.29487500 | 1.47049100  |
| H    | 0.99149200  | -4.53137800 | -0.25228300 |
| H    | 2.66916600  | -3.32798600 | -1.63793000 |
| Se   | 1.84081500  | 1.20440400  | 0.50747700  |
| C    | 0.35872100  | 1.78604700  | -0.81501700 |
| H    | 0.73991500  | 1.46949200  | -1.78876200 |
| C    | 0.28219400  | 3.31202600  | -0.76322200 |
| H    | -0.46907300 | 3.66637200  | -1.47896900 |
| H    | -0.00240600 | 3.67426700  | 0.22975000  |
| H    | 1.24563100  | 3.76232300  | -1.02421200 |
| C    | -0.92635500 | 1.06644800  | -0.52219700 |
| C    | -1.33140000 | 0.00218900  | -1.33932500 |
| C    | -1.72153800 | 1.39252800  | 0.58844100  |
| C    | -2.49855000 | -0.71509200 | -1.07426700 |
| H    | -0.71460900 | -0.28397200 | -2.18681500 |
| C    | -2.89103400 | 0.69033000  | 0.86856800  |
| H    | -1.41135700 | 2.18987000  | 1.25687700  |
| C    | -3.26192100 | -0.35618700 | 0.02834800  |
| H    | -2.81413200 | -1.54349200 | -1.69944400 |
| H    | -3.51271000 | 0.93396800  | 1.72379900  |
| F    | -4.39207200 | -1.04369200 | 0.29967900  |

## 13

B3LYP-D3 SCF energy: -4539.852673 a.u.

B3LYP-D3 enthalpy: -4537.943276 a.u.

B3LYP-D3 free energy: -4538.194582 a.u.

M06 SCF energy in solution: -4538.824617 a.u.

## Cartesian coordinates

| ATOM | X           | Y           | Z           |
|------|-------------|-------------|-------------|
| C    | -0.52355200 | 0.87401400  | 4.01918000  |
| C    | -0.06297600 | 0.23304300  | 2.84977200  |
| C    | 0.81415600  | 0.93040500  | 1.99368000  |
| C    | 1.20816600  | 2.23921800  | 2.31950000  |
| C    | 0.74302400  | 2.84863600  | 3.48160900  |
| C    | -0.12296200 | 2.17382600  | 4.33586000  |
| C    | -0.50885500 | -1.17317700 | 2.62542400  |
| C    | -1.39182800 | -1.54582400 | 1.59365300  |
| C    | -0.07907200 | -2.15859500 | 3.54755000  |
| C    | -1.82942100 | -2.87791100 | 1.50089600  |
| C    | -0.48868300 | -3.48750100 | 3.41867700  |
| C    | -1.37225300 | -3.83362700 | 2.40063200  |
| P    | 1.47050500  | 0.14607900  | 0.44869600  |
| P    | -1.89552400 | -0.32498600 | 0.28915200  |
| C    | 2.18742700  | -1.43442100 | 0.99229200  |
| C    | 2.02765500  | -2.60254200 | 0.25310500  |
| C    | 2.92387900  | -1.46883300 | 2.18466400  |
| C    | 2.53120300  | -3.82588000 | 0.70920500  |
| C    | 3.51351200  | -2.65012900 | 2.63206000  |
| C    | 3.29153800  | -3.84773100 | 1.89932800  |
| C    | 2.85140600  | 1.25185000  | -0.01967200 |

|   |             |             |             |   |             |             |             |
|---|-------------|-------------|-------------|---|-------------|-------------|-------------|
| C | 4.16680100  | 0.94741800  | 0.31927100  | C | 4.83146700  | -5.78969200 | 1.65638400  |
| C | 2.57403300  | 2.46127700  | -0.67357300 | H | 5.43755900  | -5.08822300 | 1.07670300  |
| C | 5.21447400  | 1.83324300  | 0.03921200  | H | 5.49913000  | -6.33498100 | 2.33606900  |
| C | 3.59290400  | 3.36465800  | -0.98196500 | H | 4.39860300  | -6.52277100 | 0.95623200  |
| C | 4.93036200  | 3.03861300  | -0.63601800 | C | -7.08793400 | -0.55355300 | -0.97359000 |
| C | -2.53575300 | 1.15060400  | 1.14851300  | H | -7.75556100 | -1.00828100 | -1.70626100 |
| C | -2.16101800 | 2.41842200  | 0.69010800  | C | -7.09815600 | 0.96386100  | -1.23592800 |
| C | -3.42486300 | 1.04245100  | 2.22120500  | H | -6.51119900 | 1.51183000  | -0.48927300 |
| C | -2.63666500 | 3.57932400  | 1.30415600  | H | -6.68885400 | 1.19783100  | -2.22506100 |
| C | -3.95776100 | 2.18174600  | 2.83565600  | H | -8.12373100 | 1.34687100  | -1.19130800 |
| C | -3.52535200 | 3.45615400  | 2.40097200  | C | -7.64896600 | -0.87840100 | 0.42435500  |
| C | -3.34137000 | -1.11271900 | -0.52361200 | H | -8.65899300 | -0.46834700 | 0.53906300  |
| C | -4.63129800 | -0.59191200 | -0.43643700 | H | -7.69764000 | -1.95984300 | 0.59061300  |
| C | -3.12404800 | -2.24008300 | -1.33063900 | H | -7.01847300 | -0.44652000 | 1.20843500  |
| C | -5.70074400 | -1.16362200 | -1.14470500 | C | -3.86892700 | -4.05348200 | -2.91994300 |
| C | -4.16070400 | -2.84885800 | -2.03526200 | H | -4.82158800 | -4.56529600 | -3.08070300 |
| C | -5.46385100 | -2.29100500 | -1.95975000 | C | -3.36269400 | -3.58518600 | -4.29902100 |
| H | 1.89371500  | 2.78061300  | 1.68156300  | H | -2.42771400 | -3.01917100 | -4.20594500 |
| H | 1.05812500  | 3.85966800  | 3.72052500  | H | -3.17065200 | -4.44256500 | -4.95461600 |
| H | -2.53689700 | -3.17747400 | 0.74150600  | H | -4.09742000 | -2.94090200 | -4.79218800 |
| H | -1.71382800 | -4.86095800 | 2.31276300  | C | -2.88654400 | -5.04917000 | -2.28027000 |
| H | 1.49757600  | -2.57478900 | -0.68999900 | H | -1.87589600 | -4.63641900 | -2.17967900 |
| H | 3.03227400  | -0.56024500 | 2.76389600  | H | -3.22186600 | -5.35773800 | -1.28346200 |
| H | 4.39371800  | 0.00830000  | 0.80796600  | H | -2.80606400 | -5.94730100 | -2.90273300 |
| H | 1.54905400  | 2.70101200  | -0.94383500 | C | 3.28485700  | 4.65748100  | -1.72700600 |
| H | -1.46211700 | 2.49660000  | -0.13861400 | H | 4.01194200  | 5.40533100  | -1.39713500 |
| H | -3.71121500 | 0.05807000  | 2.57965200  | C | 1.87793800  | 5.20475500  | -1.44689500 |
| H | -4.82019400 | 0.27529000  | 0.18522800  | H | 1.09927300  | 4.56052200  | -1.86736500 |
| H | -2.11870000 | -2.63971100 | -1.42486000 | H | 1.68820500  | 5.31223700  | -0.37249200 |
| N | -6.48359800 | -2.91778800 | -2.74724000 | H | 1.76040300  | 6.18836700  | -1.91476600 |
| C | -7.49022700 | -3.69782000 | -2.04246200 | C | 3.49898100  | 4.44168200  | -3.23853900 |
| H | -7.01022500 | -4.27778800 | -1.24792900 | H | 3.18970700  | 5.32639800  | -3.80743800 |
| H | -8.29779800 | -3.09781000 | -1.58793600 | H | 4.55096700  | 4.23888400  | -3.45664600 |
| H | -7.95446100 | -4.40240000 | -2.74348300 | H | 2.90690700  | 3.58962700  | -3.58749800 |
| C | -6.95542800 | -2.20293700 | -3.92427500 | C | 6.61466200  | 1.44528700  | 0.50263000  |
| H | -6.11098800 | -1.71110600 | -4.41582800 | H | 7.29883400  | 2.25778700  | 0.25593400  |
| H | -7.38998300 | -2.92022800 | -4.63153500 | C | 6.66376400  | 1.26928900  | 2.03294500  |
| H | -7.72067400 | -1.43388600 | -3.71703200 | H | 6.02485500  | 0.44213700  | 2.36341200  |
| N | -3.93353400 | 4.67098500  | 3.03874800  | H | 7.68645900  | 1.04801700  | 2.35889400  |
| N | 5.94241600  | 3.98160000  | -1.01006300 | H | 6.32910300  | 2.17738900  | 2.54681600  |
| N | 3.85434100  | -5.04915500 | 2.44408300  | C | 7.11534100  | 0.17997100  | -0.21885200 |
| C | -3.54985100 | 4.87728800  | 4.42635800  | H | 6.48406000  | -0.68636100 | 0.01229100  |
| H | -3.48753700 | 5.95476000  | 4.62589500  | H | 7.10967700  | 0.31621200  | -1.30558200 |
| H | -4.24217400 | 4.44234300  | 5.16752600  | H | 8.13862000  | -0.05888900 | 0.09267200  |
| H | -2.55884900 | 4.44328000  | 4.59265400  | H | -0.48698200 | 2.65261000  | 5.23808600  |
| C | -5.22086500 | 5.22541900  | 2.64846700  | H | -0.13839400 | -4.24653400 | 4.10675000  |
| H | -5.33405900 | 5.15721600  | 1.56158600  | O | 0.73943900  | -1.72761200 | 4.54670500  |
| H | -6.08826400 | 4.72194100  | 3.11172000  | O | -1.38560500 | 0.16091200  | 4.79875300  |
| H | -5.26015600 | 6.28495200  | 2.92914600  | C | 1.04066700  | -2.62710400 | 5.60779300  |
| C | 6.93390700  | 3.56235100  | -1.99104600 | H | 1.68269100  | -3.44773500 | 5.26559000  |
| H | 7.33009200  | 4.44945500  | -2.50133200 | H | 1.58143300  | -2.04131600 | 6.35187000  |
| H | 7.79222900  | 3.00868100  | -1.57316800 | H | 0.12612400  | -3.03404800 | 6.05666200  |
| H | 6.45533000  | 2.92491200  | -2.73999100 | C | -1.26446000 | 0.30553600  | 6.21201900  |
| C | 6.43436000  | 4.85708100  | 0.04287700  | H | -1.66978100 | 1.26021700  | 6.56613900  |
| H | 7.13624000  | 4.37184600  | 0.74497400  | H | -1.85159200 | -0.50552400 | 6.64685300  |
| H | 6.95170300  | 5.71159600  | -0.40985800 | H | -0.21625000 | 0.21256900  | 6.51874700  |
| H | 5.58892800  | 5.24104700  | 0.62337300  | C | -5.00174000 | 2.00733500  | 3.93444900  |
| C | 2.94405200  | -5.87439100 | 3.22158300  | H | -5.40177500 | 2.99199800  | 4.18099400  |
| H | 2.22702300  | -6.45249200 | 2.61038700  | C | -6.18982000 | 1.15589700  | 3.45039600  |
| H | 3.52145600  | -6.58497200 | 3.82529500  | H | -5.88946400 | 0.12245200  | 3.24330100  |
| H | 2.36547800  | -5.24056900 | 3.90209000  | H | -6.97169000 | 1.12303800  | 4.21739400  |

|    |             |             |             |
|----|-------------|-------------|-------------|
| H  | -6.62720200 | 1.57132700  | 2.53580700  |
| C  | -4.38851000 | 1.41859500  | 5.21630300  |
| H  | -3.93919700 | 0.43940600  | 5.02397500  |
| H  | -3.60243300 | 2.07294700  | 5.60628800  |
| H  | -5.15482800 | 1.30454100  | 5.99155200  |
| C  | -2.16610300 | 4.95526800  | 0.84673800  |
| H  | -2.94498000 | 5.67139900  | 1.11971000  |
| C  | -0.88993000 | 5.36178900  | 1.60823400  |
| H  | -0.07123100 | 4.66886200  | 1.38437800  |
| H  | -0.57468600 | 6.37169000  | 1.32093700  |
| H  | -1.05894500 | 5.34727500  | 2.68942500  |
| C  | -1.93883400 | 5.05171100  | -0.66753200 |
| H  | -1.08026400 | 4.45434100  | -0.98973900 |
| H  | -2.81941000 | 4.71920500  | -1.23039400 |
| H  | -1.72628600 | 6.08948300  | -0.94788100 |
| C  | 4.41431000  | -2.64212100 | 3.86553300  |
| H  | 4.15782800  | -3.52045700 | 4.46951100  |
| C  | 4.25994200  | -1.38885300 | 4.74335400  |
| H  | 4.69132900  | -0.50469200 | 4.25758700  |
| H  | 3.21431300  | -1.16355100 | 4.96904700  |
| H  | 4.79801400  | -1.52995400 | 5.68684700  |
| C  | 5.89365900  | -2.78952200 | 3.44995600  |
| H  | 6.19505800  | -1.95544400 | 2.80442600  |
| H  | 6.54099200  | -2.78067400 | 4.33468800  |
| H  | 6.06673400  | -3.72241700 | 2.91113200  |
| C  | 2.23719200  | -5.07045900 | -0.12342300 |
| H  | 2.49787700  | -5.94884700 | 0.46974600  |
| C  | 0.74106200  | -5.19728700 | -0.47159300 |
| H  | 0.42328800  | -4.41720500 | -1.17187600 |
| H  | 0.55069900  | -6.16128900 | -0.95694600 |
| H  | 0.11542200  | -5.12667500 | 0.42357800  |
| C  | 3.09199000  | -5.08213200 | -1.40597400 |
| H  | 2.85882100  | -4.21891200 | -2.03781100 |
| H  | 4.16151300  | -5.05153700 | -1.17296600 |
| H  | 2.89401200  | -5.98653100 | -1.99248500 |
| Rh | -0.09609800 | 0.03502800  | -1.26069700 |
| C  | -0.67957000 | 4.38878700  | -3.88298400 |
| C  | -1.09180100 | 3.10703100  | -3.53670900 |
| C  | -0.48514800 | 1.97320700  | -4.11013000 |
| C  | 0.54462700  | 2.16126400  | -5.05239800 |
| C  | 0.95858200  | 3.43727100  | -5.41667000 |
| C  | 0.34796400  | 4.53177400  | -4.81242700 |
| H  | -1.12681500 | 5.27143300  | -3.44063900 |
| H  | -1.89492300 | 2.99247500  | -2.81623600 |
| H  | 1.03009800  | 1.29365900  | -5.48710500 |
| H  | 1.75724000  | 3.59799900  | -6.13204800 |
| F  | 0.78194900  | 5.76741800  | -5.11266900 |
| C  | -0.90470100 | 0.60918900  | -3.79482100 |
| C  | -1.91616800 | 0.22762400  | -2.96147000 |
| C  | 1.73151600  | -2.00374400 | -3.62832100 |
| C  | 2.81922000  | -2.54966100 | -4.33155300 |
| C  | 2.70297700  | -3.77918900 | -4.97861300 |
| C  | 1.50334900  | -4.49517200 | -4.93172800 |
| C  | 0.41869400  | -3.96007300 | -4.23874500 |
| C  | 0.52670000  | -2.72197200 | -3.59611000 |
| H  | 3.76401200  | -2.01364600 | -4.36369900 |
| H  | 3.55804700  | -4.18321800 | -5.51404700 |
| H  | 1.41745300  | -5.45702000 | -5.42851200 |
| H  | -0.52009600 | -4.50378300 | -4.19404800 |
| H  | -0.33204700 | -2.32406400 | -3.06554400 |
| Se | 2.04393400  | -0.29042200 | -2.72811600 |

|   |             |             |             |
|---|-------------|-------------|-------------|
| H | -0.01041600 | -1.46954800 | -1.13548900 |
| H | -2.26222300 | -0.79607100 | -2.98040700 |
| H | -2.58454900 | 0.93950100  | -2.48494700 |
| H | -0.39709500 | -0.17380100 | -4.35143700 |

#### 14-ts-S

B3LYP-D3 SCF energy: -4539.840613 a.u.

B3LYP-D3 enthalpy: -4537.933647 a.u.

B3LYP-D3 free energy: -4538.184222 a.u.

M06 SCF energy in solution: -4538.809519 a.u.

Imaginary frequency: -128.70 cm<sup>-1</sup>

#### Cartesian coordinates

| ATOM | X           | Y           | Z           |  |
|------|-------------|-------------|-------------|--|
| C    | 0.85708700  | -1.27978300 | -4.01995700 |  |
| C    | 0.26147700  | -1.24643300 | -2.74292900 |  |
| C    | -0.67134100 | -0.22763900 | -2.45928800 |  |
| C    | -0.98218700 | 0.73053700  | -3.43593600 |  |
| C    | -0.37344400 | 0.68125200  | -4.68790000 |  |
| C    | 0.54722000  | -0.31928100 | -4.98655000 |  |
| C    | 0.59466600  | -2.36111000 | -1.80109100 |  |
| C    | 1.37803700  | -2.21315600 | -0.63782100 |  |
| C    | 0.13683600  | -3.65665600 | -2.14827100 |  |
| C    | 1.68879300  | -3.33805200 | 0.14486900  |  |
| C    | 0.41984700  | -4.76063100 | -1.34058400 |  |
| C    | 1.20591300  | -4.59332600 | -0.20395400 |  |
| P    | -1.42840700 | -0.12331600 | -0.78218100 |  |
| P    | 1.88781800  | -0.53949200 | -0.02957200 |  |
| C    | -2.27792600 | -1.71778200 | -0.55387300 |  |
| C    | -2.23994200 | -2.36331400 | 0.67888900  |  |
| C    | -2.97708100 | -2.30346900 | -1.61679500 |  |
| C    | -2.83387000 | -3.61789600 | 0.86160200  |  |
| C    | -3.63744000 | -3.52144600 | -1.46035600 |  |
| C    | -3.54544000 | -4.19615600 | -0.21235700 |  |
| C    | -2.74439600 | 1.13954100  | -0.91837600 |  |
| C    | -4.09481600 | 0.80587400  | -0.96082400 |  |
| C    | -2.37995400 | 2.49453900  | -0.88271100 |  |
| C    | -5.09178000 | 1.79159200  | -0.97701800 |  |
| C    | -3.34019200 | 3.50581800  | -0.87577500 |  |
| C    | -4.71437100 | 3.14793500  | -0.90250100 |  |
| C    | 2.65810500  | 0.33219000  | -1.43224100 |  |
| C    | 2.30720700  | 1.66264400  | -1.68005400 |  |
| C    | 3.62209900  | -0.28336100 | -2.23545300 |  |
| C    | 2.88427000  | 2.38230900  | -2.72836000 |  |
| C    | 4.25501800  | 0.41602900  | -3.26933800 |  |
| C    | 3.85193500  | 1.74446500  | -3.54247200 |  |
| C    | 3.21933700  | -0.84455700 | 1.19536700  |  |
| C    | 4.55488700  | -0.51366000 | 0.96517500  |  |
| C    | 2.86818500  | -1.38726900 | 2.43922200  |  |
| C    | 5.53643000  | -0.70789700 | 1.94864500  |  |
| C    | 3.81590300  | -1.62646700 | 3.43254500  |  |
| C    | 5.16873900  | -1.27438900 | 3.18973500  |  |
| H    | -1.70842800 | 1.50650200  | -3.22626700 |  |
| H    | -0.62115200 | 1.42715000  | -5.43728500 |  |
| H    | 2.31432400  | -3.24424800 | 1.02169400  |  |
| H    | 1.44863500  | -5.45418500 | 0.41244700  |  |
| H    | -1.72576400 | -1.89644800 | 1.51084100  |  |
| H    | -2.99576500 | -1.79640900 | -2.57397900 |  |
| H    | -4.38875600 | -0.23699300 | -0.97938000 |  |
| H    | -1.32627400 | 2.76185600  | -0.83877800 |  |
| H    | 1.54470300  | 2.13525800  | -1.06540400 |  |



|   |             |             |             |   |             |             |             |
|---|-------------|-------------|-------------|---|-------------|-------------|-------------|
| H | 3.88723200  | -1.32017200 | -2.05061800 | C | -1.59863400 | 5.28795700  | -1.45844800 |
| H | 4.84601500  | -0.08709400 | 0.01263800  | H | -0.74618400 | 4.82982500  | -0.94621800 |
| H | 1.82947900  | -1.63145800 | 2.63672500  | H | -1.59338700 | 4.94383900  | -2.49870700 |
| N | 6.10333700  | -1.51007500 | 4.24927500  | H | -1.42613800 | 6.36998900  | -1.45478600 |
| C | 7.12404700  | -2.52819200 | 4.05113100  | C | -2.86425800 | 5.36393300  | 0.73250300  |
| H | 6.69465300  | -3.36974900 | 3.49921200  | H | -2.56123600 | 6.41182200  | 0.84313500  |
| H | 8.01932900  | -2.18246800 | 3.50639100  | H | -3.83929700 | 5.23540800  | 1.21160300  |
| H | 7.45562500  | -2.89846700 | 5.02949800  | H | -2.13798400 | 4.74301100  | 1.26856500  |
| C | 6.51248600  | -0.35789800 | 5.03801700  | C | -6.54326800 | 1.33330700  | -1.06947200 |
| H | 5.64580300  | 0.28206800  | 5.22847400  | H | -7.18074900 | 2.21483800  | -1.14968500 |
| H | 6.90167000  | -0.70029000 | 6.00480800  | C | -6.78543400 | 0.49009600  | -2.33650000 |
| H | 7.29364900  | 0.26247200  | 4.56267600  | H | -6.20794100 | -0.44169500 | -2.31858900 |
| N | 4.36973700  | 2.49796700  | -4.64327300 | H | -7.84479000 | 0.22140800  | -2.41747500 |
| N | -5.66227800 | 4.22041500  | -0.83330800 | H | -6.50208000 | 1.04250100  | -3.23926200 |
| N | -4.18536100 | -5.47736100 | -0.12455800 | C | -6.96602700 | 0.56530800  | 0.19743600  |
| C | 4.10098200  | 2.01514700  | -5.98836300 | H | -6.37329400 | -0.34878300 | 0.32240900  |
| H | 4.10853900  | 2.86424600  | -6.68382900 | H | -6.82914900 | 1.17827500  | 1.09494300  |
| H | 4.82329100  | 1.27099500  | -6.36568500 | H | -8.02129900 | 0.27531500  | 0.13717300  |
| H | 3.10403600  | 1.56398300  | -6.01376200 | H | 1.01899300  | -0.35593200 | -5.96225500 |
| C | 5.64594800  | 3.16809900  | -4.44874200 | H | 0.04559300  | -5.74468100 | -1.59338000 |
| H | 5.66427200  | 3.63868600  | -3.46022400 | O | -0.58056600 | -3.74631800 | -3.30275800 |
| H | 6.52313100  | 2.50051000  | -4.52276100 | O | 1.74890700  | -2.28882000 | -4.24308500 |
| H | 5.76098800  | 3.95605300  | -5.20296800 | C | -0.92780500 | -5.03981500 | -3.78238900 |
| C | -6.52140200 | 4.29467700  | 0.33933300  | H | -1.66047300 | -5.52542300 | -3.12582400 |
| H | -6.84830100 | 5.33299300  | 0.47868900  | H | -1.37849700 | -4.88380800 | -4.76311400 |
| H | -7.42665600 | 3.66511400  | 0.29102600  | H | -0.04190100 | -5.67886800 | -3.88558000 |
| H | -5.95137900 | 3.99687500  | 1.22434600  | C | 1.76135500  | -2.87485400 | -5.54249800 |
| C | -6.27444100 | 4.62943100  | -2.08832600 | H | 2.24694000  | -2.22900900 | -6.28310100 |
| H | -7.06426800 | 3.94703900  | -2.45076500 | H | 2.34014000  | -3.79589200 | -5.44989700 |
| H | -6.72150600 | 5.62345900  | -1.96603000 | H | 0.74093600  | -3.10750900 | -5.86855100 |
| H | -5.50515100 | 4.69611800  | -2.86470300 | C | 5.37303700  | -0.27120600 | -4.04715700 |
| C | -3.31625200 | -6.62979300 | -0.29820300 | H | 5.84267600  | 0.47197900  | -4.69353800 |
| H | -2.68492300 | -6.85495600 | 0.58097400  | C | 6.47157900  | -0.79717600 | -3.10469300 |
| H | -3.92499200 | -7.51700400 | -0.51091100 | H | 6.10244000  | -1.60943900 | -2.46823300 |
| H | -2.65060400 | -6.46138800 | -1.15170600 | H | 7.31339700  | -1.19185800 | -3.68456500 |
| C | -5.26383200 | -5.66099200 | 0.83713300  | H | 6.84958800  | -0.00176700 | -2.45269800 |
| H | -5.83250800 | -4.73135700 | 0.92697400  | C | 4.83365800  | -1.39789100 | -4.94477800 |
| H | -5.94344000 | -6.44091400 | 0.46957600  | H | 4.32126600  | -2.16125600 | -4.35121800 |
| H | -4.93571300 | -5.95619900 | 1.84762900  | H | 4.11457900  | -1.00565700 | -5.67088900 |
| C | 6.97435200  | -0.31739000 | 1.62203200  | H | 5.65187900  | -1.87524900 | -5.49612800 |
| H | 7.55481700  | -0.34975200 | 2.54537100  | C | 2.43669500  | 3.80899900  | -3.01924500 |
| C | 7.08281100  | 1.11896300  | 1.07668600  | H | 3.20572500  | 4.26659600  | -3.64570100 |
| H | 6.59788100  | 1.22358000  | 0.09890400  | C | 1.12881300  | 3.80084000  | -3.83264400 |
| H | 6.62077300  | 1.83921500  | 1.76091600  | H | 0.32201100  | 3.31889000  | -3.26884400 |
| H | 8.13593100  | 1.39390700  | 0.95025000  | H | 0.81614200  | 4.82375100  | -4.07307400 |
| C | 7.60073100  | -1.32709900 | 0.64068800  | H | 1.25605800  | 3.24789000  | -4.76883600 |
| H | 8.64459600  | -1.06608200 | 0.43151600  | C | 2.28236900  | 4.65908500  | -1.74931000 |
| H | 7.57690400  | -2.34412500 | 1.04578800  | H | 1.44000100  | 4.31730300  | -1.13937700 |
| H | 7.05757100  | -1.33178100 | -0.31034600 | H | 3.18619100  | 4.63131500  | -1.12981700 |
| C | 3.37172800  | -2.21998400 | 4.76312800  | H | 2.08002200  | 5.70237500  | -2.01692900 |
| H | 4.27969700  | -2.54785700 | 5.27653700  | C | -4.47482100 | -4.09673200 | -2.60038000 |
| C | 2.70108200  | -1.14614300 | 5.64267400  | H | -4.27119100 | -5.17280100 | -2.65024800 |
| H | 1.77932400  | -0.77259600 | 5.18013200  | C | -4.16206400 | -3.48013900 | -3.97385500 |
| H | 2.43659900  | -1.55911100 | 6.62320900  | H | -4.53519300 | -2.45076800 | -4.04399300 |
| H | 3.36469400  | -0.29005800 | 5.80396400  | H | -3.08949900 | -3.45671700 | -4.18525100 |
| C | 2.44660400  | -3.43792300 | 4.59088300  | H | -4.65993300 | -4.05656300 | -4.76093700 |
| H | 1.48027800  | -3.16735800 | 4.14632300  | C | -5.97941200 | -3.92986600 | -2.30044800 |
| H | 2.90510500  | -4.20091800 | 3.95177400  | H | -6.23375800 | -2.86718700 | -2.20174000 |
| H | 2.23875200  | -3.89365200 | 5.56574500  | H | -6.58044200 | -4.34470000 | -3.11811600 |
| C | -2.92570700 | 4.96665300  | -0.75597100 | H | -6.26271700 | -4.43925100 | -1.37781000 |
| H | -3.71261500 | 5.56697500  | -1.22080100 | C | -2.68948700 | -4.28357500 | 2.22668000  |

|    |             |             |            |   |             |             |             |
|----|-------------|-------------|------------|---|-------------|-------------|-------------|
| H  | -3.01725600 | -5.32100200 | 2.14066800 | P | 1.86564600  | -0.54724700 | 0.23675300  |
| C  | -1.22478200 | -4.32180700 | 2.70461000 | C | -2.23713200 | -1.88195100 | -0.38522400 |
| H  | -0.84088500 | -3.31789800 | 2.91581500 | C | -2.27886200 | -2.22721400 | 0.96265500  |
| H  | -1.14817800 | -4.89988400 | 3.63276600 | C | -2.86970200 | -2.70040000 | -1.32798800 |
| H  | -0.57400400 | -4.77927000 | 1.95310200 | C | -2.88714300 | -3.41364400 | 1.39026600  |
| C  | -3.58628400 | -3.58212700 | 3.26550700 | C | -3.52379500 | -3.86940600 | -0.94144800 |
| H  | -3.29717900 | -2.53286200 | 3.38612800 | C | -3.51084900 | -4.24175700 | 0.43044800  |
| H  | -4.63879800 | -3.61049200 | 2.96425400 | C | -2.69120700 | 0.81212100  | -1.36865300 |
| H  | -3.49643800 | -4.06591000 | 4.24477800 | C | -4.02374300 | 0.54174800  | -1.07209600 |
| Rh | 0.08312500  | 0.55681900  | 0.94572700 | C | -2.33845800 | 2.10457000  | -1.79096600 |
| C  | 0.74711200  | 5.65976500  | 1.41466300 | C | -5.01673600 | 1.52431200  | -1.19853800 |
| C  | 0.83978500  | 4.30280300  | 1.70649400 | C | -3.29234600 | 3.11396800  | -1.91858000 |
| C  | 0.25621400  | 3.76913600  | 2.87088000 | C | -4.64730300 | 2.82314200  | -1.60191100 |
| C  | -0.42636500 | 4.64325400  | 3.73970300 | C | 2.81251500  | -0.06591900 | -1.24386900 |
| C  | -0.52560700 | 6.00102200  | 3.46414500 | C | 2.52616600  | 1.14779900  | -1.87794900 |
| C  | 0.05825100  | 6.48705000  | 2.29632800 | C | 3.83484400  | -0.87650800 | -1.74288600 |
| H  | 1.18602600  | 6.08198900  | 0.51816300 | C | 3.22089200  | 1.54939300  | -3.01996900 |
| H  | 1.37835200  | 3.65698800  | 1.02106000 | C | 4.58959100  | -0.48576800 | -2.85540500 |
| H  | -0.89676100 | 4.24281400  | 4.63370900 | C | 4.24750600  | 0.71206000  | -3.52370100 |
| H  | -1.05337000 | 6.68274500  | 4.12189700 | C | 3.02956600  | -0.53329900 | 1.65262500  |
| F  | -0.06338000 | 7.79120700  | 2.00198300 | C | 4.39047900  | -0.26481000 | 1.51429700  |
| C  | 0.33577000  | 2.34140000  | 3.20021100 | C | 2.50929100  | -0.73643400 | 2.93950300  |
| C  | 1.25469700  | 1.42698500  | 2.55080000 | C | 5.23539700  | -0.18051200 | 2.63236900  |
| C  | -2.04993000 | 0.19041500  | 3.91170000 | C | 3.31624000  | -0.68060600 | 4.07340100  |
| C  | -3.25151900 | 0.20759100  | 4.63327900 | C | 4.69313200  | -0.37250800 | 3.92120800  |
| C  | -3.42987600 | -0.65375600 | 5.71806600 | H | -1.49955700 | 0.58291900  | -3.71791300 |
| C  | -2.41189600 | -1.52989500 | 6.10101000 | H | -0.20456500 | 0.00985700  | -5.73876700 |
| C  | -1.21442600 | -1.54673800 | 5.38436300 | H | 2.12266500  | -2.91961500 | 1.92818000  |
| C  | -1.03479000 | -0.69696700 | 4.29071000 | H | 1.30419300  | -5.22707200 | 1.75448300  |
| H  | -4.04686700 | 0.89132200  | 4.35014900 | H | -1.81157300 | -1.57538300 | 1.69220400  |
| H  | -4.36793700 | -0.63503600 | 6.26581000 | H | -2.83526700 | -2.41861600 | -2.37363000 |
| H  | -2.55354400 | -2.19683900 | 6.94622300 | H | -4.30410200 | -0.44742000 | -0.72920500 |
| H  | -0.41521900 | -2.22702100 | 5.66513000 | H | -1.29478100 | 2.32908300  | -1.99491600 |
| H  | -0.10633500 | -0.73185000 | 3.73533500 | H | 1.72604600  | 1.77348900  | -1.49145900 |
| Se | -1.88173900 | 1.46643200  | 2.42706600 | H | 4.05155100  | -1.82282900 | -1.25620100 |
| H  | -0.06537500 | -0.77491700 | 1.64554400 | H | 4.81104900  | -0.11185400 | 0.52706800  |
| H  | 1.62788700  | 0.64727800  | 3.20814400 | H | 1.44831700  | -0.93139100 | 3.05487200  |
| H  | 2.08139400  | 1.90439800  | 2.01906300 | N | 5.46704000  | -0.26427200 | 5.12327400  |
| H  | 0.03234900  | 2.09242900  | 4.21442000 | C | 6.38108000  | -1.35683400 | 5.42231700  |

### 15-S

B3LYP-D3 SCF energy: -4539.842729 a.u.

B3LYP-D3 enthalpy: -4537.934549 a.u.

B3LYP-D3 free energy: -4538.184297 a.u.

M06 SCF energy in solution: -4538.816130 a.u.

#### Cartesian coordinates

| ATOM | X           | Y           | Z           |
|------|-------------|-------------|-------------|
| C    | 1.19167800  | -2.19494600 | -3.56754600 |
| C    | 0.48073100  | -1.87337000 | -2.39386600 |
| C    | -0.49314000 | -0.85354300 | -2.45573400 |
| C    | -0.73552900 | -0.18357300 | -3.66365300 |
| C    | -0.01189100 | -0.51444300 | -4.80747800 |
| C    | 0.95554500  | -1.51427500 | -4.76527300 |
| C    | 0.71886000  | -2.73249100 | -1.18800100 |
| C    | 1.37943600  | -2.31420700 | -0.01325700 |
| C    | 0.28602300  | -4.07991000 | -1.27237600 |
| C    | 1.59353300  | -3.22442600 | 1.03544100  |
| C    | 0.47367200  | -4.96611100 | -0.20879900 |
| C    | 1.13743000  | -4.53316100 | 0.93552000  |
| P    | -1.37267600 | -0.36909100 | -0.91380300 |

|   |             |             |             |
|---|-------------|-------------|-------------|
| P | 1.86564600  | -0.54724700 | 0.23675300  |
| C | -2.23713200 | -1.88195100 | -0.38522400 |
| C | -2.27886200 | -2.22721400 | 0.96265500  |
| C | -2.86970200 | -2.70040000 | -1.32798800 |
| C | -2.88714300 | -3.41364400 | 1.39026600  |
| C | -3.52379500 | -3.86940600 | -0.94144800 |
| C | -3.51084900 | -4.24175700 | 0.43044800  |
| C | -2.69120700 | 0.81212100  | -1.36865300 |
| C | -4.02374300 | 0.54174800  | -1.07209600 |
| C | -2.33845800 | 2.10457000  | -1.79096600 |
| C | -5.01673600 | 1.52431200  | -1.19853800 |
| C | -3.29234600 | 3.11396800  | -1.91858000 |
| C | -4.64730300 | 2.82314200  | -1.60191100 |
| C | 2.81251500  | -0.06591900 | -1.24386900 |
| C | 2.52616600  | 1.14779900  | -1.87794900 |
| C | 3.83484400  | -0.87650800 | -1.74288600 |
| C | 3.22089200  | 1.54939300  | -3.01996900 |
| C | 4.58959100  | -0.48576800 | -2.85540500 |
| C | 4.24750600  | 0.71206000  | -3.52370100 |
| C | 3.02956600  | -0.53329900 | 1.65262500  |
| C | 4.39047900  | -0.26481000 | 1.51429700  |
| C | 2.50929100  | -0.73643400 | 2.93950300  |
| C | 5.23539700  | -0.18051200 | 2.63236900  |
| C | 3.31624000  | -0.68060600 | 4.07340100  |
| C | 4.69313200  | -0.37250800 | 3.92120800  |
| H | -1.49955700 | 0.58291900  | -3.71791300 |
| H | -0.20456500 | 0.00985700  | -5.73876700 |
| H | 2.12266500  | -2.91961500 | 1.92818000  |
| H | 1.30419300  | -5.22707200 | 1.75448300  |
| H | -1.81157300 | -1.57538300 | 1.69220400  |
| H | -2.83526700 | -2.41861600 | -2.37363000 |
| H | -4.30410200 | -0.44742000 | -0.72920500 |
| H | -1.29478100 | 2.32908300  | -1.99491600 |
| H | 1.72604600  | 1.77348900  | -1.49145900 |
| H | 4.05155100  | -1.82282900 | -1.25620100 |
| H | 4.81104900  | -0.11185400 | 0.52706800  |
| H | 1.44831700  | -0.93139100 | 3.05487200  |
| N | 5.46704000  | -0.26427200 | 5.12327400  |
| C | 6.38108000  | -1.35683400 | 5.42231700  |
| H | 5.88750900  | -2.31150500 | 5.21384600  |
| H | 7.32616800  | -1.32971000 | 4.85197500  |
| H | 6.63520100  | -1.33172000 | 6.48911800  |
| C | 5.92880700  | 1.06131400  | 5.50951200  |
| H | 5.15173900  | 1.79770900  | 5.28466400  |
| H | 6.11148100  | 1.07785300  | 6.59134100  |
| H | 6.85803300  | 1.38820100  | 5.01039500  |
| N | 4.88836600  | 1.13546800  | -4.73161300 |
| N | -5.57998000 | 3.90658300  | -1.70069100 |
| N | -4.12410900 | -5.49686800 | 0.76048000  |
| C | 4.75624600  | 0.28893600  | -5.90680700 |
| H | 4.85362900  | 0.90762700  | -6.80815900 |
| H | 5.50134300  | -0.52185000 | -5.97902900 |
| H | 3.75991100  | -0.16424900 | -5.91167600 |
| C | 6.15347700  | 1.84190500  | -4.59945400 |
| H | 6.08566700  | 2.56346600  | -3.77881800 |
| H | 7.01884200  | 1.18433100  | -4.40143900 |
| H | 6.35869300  | 2.39542700  | -5.52384100 |
| C | -6.25015000 | 4.35386100  | -0.48889200 |
| H | -6.51976900 | 5.41249600  | -0.59682700 |
| H | -7.17258200 | 3.80156300  | -0.24004000 |
| H | -5.56400600 | 4.26396600  | 0.35861400  |

|   |             |             |             |    |             |             |             |
|---|-------------|-------------|-------------|----|-------------|-------------|-------------|
| C | -6.38395600 | 3.95974900  | -2.91223500 | H  | 2.76934700  | -3.62478800 | -5.41051100 |
| H | -7.21896500 | 3.23596100  | -2.93033700 | H  | 2.82952400  | -4.93068300 | -4.20737600 |
| H | -6.80949300 | 4.96470900  | -3.02164500 | H  | 1.25404300  | -4.43129200 | -4.89770800 |
| H | -5.74910700 | 3.76259100  | -3.78209300 | C  | 5.77066700  | -1.35144100 | -3.28402800 |
| C | -3.21148500 | -6.61748200 | 0.91933500  | H  | 6.32329000  | -0.81322300 | -4.05586000 |
| H | -2.64855700 | -6.61033600 | 1.87086400  | C  | 6.74866200  | -1.58019100 | -2.11634200 |
| H | -3.77550500 | -7.55682800 | 0.86979100  | H  | 6.29725700  | -2.19149900 | -1.32670300 |
| H | -2.48251100 | -6.61454700 | 0.10192000  | H  | 7.64318100  | -2.10687000 | -2.46725500 |
| C | -5.27654600 | -5.51543800 | 1.64986600  | H  | 7.06462600  | -0.63057900 | -1.67018400 |
| H | -5.88369500 | -4.62250400 | 1.47777400  | C  | 5.31275900  | -2.69109100 | -3.88514500 |
| H | -5.89335300 | -6.39386200 | 1.41934100  | H  | 4.71385200  | -3.26001300 | -3.16702900 |
| H | -5.02929900 | -5.55641500 | 2.72386200  | H  | 4.69606400  | -2.52812000 | -4.77401600 |
| C | 6.71931800  | 0.08150500  | 2.39634600  | H  | 6.17859300  | -3.29753700 | -4.17487900 |
| H | 7.19863000  | 0.24117700  | 3.36262600  | C  | 2.85091700  | 2.83674800  | -3.74667600 |
| C | 6.96232000  | 1.34924700  | 1.55660200  | H  | 3.74470200  | 3.18163900  | -4.27248900 |
| H | 6.57128200  | 1.24385300  | 0.53769200  | C  | 1.77507800  | 2.55684800  | -4.81335800 |
| H | 6.48397900  | 2.22363500  | 2.01162000  | H  | 0.85388600  | 2.19207400  | -4.34523300 |
| H | 8.03670300  | 1.54945200  | 1.47691200  | H  | 1.53979500  | 3.46990900  | -5.37279900 |
| C | 7.38880700  | -1.14793900 | 1.75235700  | H  | 2.11645400  | 1.79576000  | -5.52155400 |
| H | 8.46267600  | -0.97462300 | 1.61714100  | C  | 2.39125400  | 3.95756800  | -2.80503000 |
| H | 7.26171600  | -2.03991300 | 2.37539300  | H  | 1.41683400  | 3.73344700  | -2.35756000 |
| H | 6.95633700  | -1.36045100 | 0.76904800  | H  | 3.10788800  | 4.12943900  | -1.99347900 |
| C | 2.70657700  | -0.89088300 | 5.45414000  | H  | 2.27533200  | 4.89207700  | -3.36528900 |
| H | 3.51639500  | -1.21869200 | 6.11187200  | C  | -4.27159200 | -4.71148600 | -1.97199100 |
| C | 2.17833600  | 0.44371200  | 6.01668200  | H  | -4.06951100 | -5.76484100 | -1.74630900 |
| H | 1.37709700  | 0.84625600  | 5.38395900  | C  | -3.84981400 | -4.43626200 | -3.42476500 |
| H | 1.77302300  | 0.30612600  | 7.02612800  | H  | -4.21540100 | -3.46131300 | -3.76983900 |
| H | 2.97323700  | 1.19362900  | 6.06933300  | H  | -2.76362800 | -4.44366100 | -3.55040500 |
| C | 1.60351700  | -1.96211100 | 5.47604100  | H  | -4.28250700 | -5.19430400 | -4.08647600 |
| H | 0.70312000  | -1.64398400 | 4.93661300  | C  | -5.79366800 | -4.49799200 | -1.83403900 |
| H | 1.94392900  | -2.90238300 | 5.02770200  | H  | -6.04878500 | -3.44590000 | -2.01344300 |
| H | 1.30356800  | -2.16857100 | 6.50960900  | H  | -6.33426700 | -5.10564500 | -2.56919600 |
| C | -2.88093900 | 4.52978400  | -2.30768300 | H  | -6.14806100 | -4.77404200 | -0.83902100 |
| H | -3.69674100 | 4.95584700  | -2.89990600 | C  | -2.87313500 | -3.73274100 | 2.88177000  |
| C | -1.59753900 | 4.59198200  | -3.14945400 | H  | -3.11918700 | -4.78872100 | 3.01061600  |
| H | -0.71199500 | 4.33920300  | -2.55571100 | C  | -1.49124500 | -3.51274100 | 3.52641700  |
| H | -1.63569600 | 3.91372600  | -4.00976400 | H  | -1.22951800 | -2.44951600 | 3.56938400  |
| H | -1.44749300 | 5.61024600  | -3.52407200 | H  | -1.49543600 | -3.88443000 | 4.55744000  |
| C | -2.73009700 | 5.39918900  | -1.04236200 | H  | -0.70388000 | -4.03111300 | 2.97105900  |
| H | -2.41998900 | 6.41677900  | -1.30741800 | C  | -3.94229500 | -2.89418200 | 3.60936200  |
| H | -3.67271200 | 5.46046700  | -0.49340300 | H  | -3.73585300 | -1.82567100 | 3.49028600  |
| H | -1.97019300 | 4.98009800  | -0.37469600 | H  | -4.94428800 | -3.08986200 | 3.21457900  |
| C | -6.44963900 | 1.13332600  | -0.85339100 | H  | -3.94735100 | -3.11631200 | 4.68303100  |
| H | -7.11199300 | 1.94860300  | -1.14898200 | Rh | 0.03299500  | 0.78923300  | 0.66758200  |
| C | -6.91105300 | -0.11738700 | -1.62641000 | C  | 0.81744200  | 5.80207400  | -0.24329200 |
| H | -6.34527200 | -1.01039600 | -1.33611300 | C  | 0.77228900  | 4.57814000  | 0.42256700  |
| H | -7.96880200 | -0.31794000 | -1.42205700 | C  | 0.12137600  | 4.44973900  | 1.65977800  |
| H | -6.79119000 | 0.02013700  | -2.70652000 | C  | -0.48966200 | 5.58741000  | 2.21430100  |
| C | -6.60252600 | 0.92928000  | 0.66744500  | C  | -0.45612800 | 6.81623400  | 1.56294900  |
| H | -5.94998700 | 0.12200200  | 1.02195600  | C  | 0.19548200  | 6.90146900  | 0.33566100  |
| H | -6.33755600 | 1.84087100  | 1.21502700  | H  | 1.31505600  | 5.91293100  | -1.19932100 |
| H | -7.63554900 | 0.66625500  | 0.92267700  | H  | 1.25952700  | 3.72099500  | -0.02986100 |
| H | 1.51708400  | -1.76977800 | -5.65701500 | H  | -1.00796200 | 5.50394700  | 3.16626900  |
| H | 0.11744500  | -5.98687000 | -0.26751600 | H  | -0.92591900 | 7.69927600  | 1.98217900  |
| O | -0.31109900 | -4.44253900 | -2.44185100 | F  | 0.21558600  | 8.07894900  | -0.31330300 |
| O | 2.11271300  | -3.19680800 | -3.46062800 | C  | 0.01894000  | 3.13815200  | 2.36711900  |
| C | -0.61732800 | -5.81648700 | -2.64689600 | C  | 1.01826500  | 2.05537700  | 2.05770400  |
| H | -1.41895700 | -6.15117800 | -1.97683000 | C  | -2.39745200 | 1.29581700  | 3.30205400  |
| H | -0.96169200 | -5.89466000 | -3.67877200 | C  | -3.76136400 | 1.28974700  | 3.61130800  |
| H | 0.26892600  | -6.44861400 | -2.50939200 | C  | -4.20425800 | 0.65659900  | 4.77586200  |
| C | 2.24047700  | -4.08529500 | -4.56789600 | C  | -3.29166900 | 0.04000200  | 5.63365900  |

|    |             |             |            |   |             |             |             |
|----|-------------|-------------|------------|---|-------------|-------------|-------------|
| C  | -1.93162700 | 0.04286100  | 5.31616500 | H | -1.98819700 | -4.95978600 | -2.37253300 |
| C  | -1.48127900 | 0.66286700  | 4.14873000 | H | 2.01507100  | -0.44447000 | 3.56320600  |
| H  | -4.47545700 | 1.77830000  | 2.95459300 | H | 0.82856700  | -1.16656400 | 5.59325900  |
| H  | -5.26467100 | 0.65187600  | 5.01127300 | H | -1.38969000 | 1.45550000  | 1.87732200  |
| H  | -3.63886300 | -0.44681800 | 6.54005600 | H | -3.96587400 | -1.89333400 | 1.20336200  |
| H  | -1.21368400 | -0.44040400 | 5.97261000 | H | -4.72157700 | -0.03005700 | -0.17616900 |
| H  | -0.42612600 | 0.64870400  | 3.90653500 | H | -1.55755700 | -0.18229300 | -3.06026600 |
| Se | -1.85572200 | 2.27370000  | 1.68090700 | H | 1.04550500  | -1.00838800 | -2.13182100 |
| H  | -0.23118200 | -0.22796000 | 1.75810100 | H | 2.73883200  | -3.35841900 | 1.02057500  |
| H  | 1.31082100  | 1.51074800  | 2.95458400 | H | 4.27870300  | -1.35328000 | 0.10146400  |
| H  | 1.92984300  | 2.44105800  | 1.58878100 | H | 2.10692100  | 1.55434700  | 2.38408900  |
| H  | -0.20226900 | 3.26648100  | 3.42927200 | N | 6.61727300  | 2.18462200  | 1.97558700  |

### 16-ts-S

B3LYP-D3 SCF energy: -4539.828075 a.u.

B3LYP-D3 enthalpy: -4537.921544 a.u.

B3LYP-D3 free energy: -4538.174812 a.u.

M06 SCF energy in solution: -4538.805302 a.u.

Imaginary frequency: -837.69 cm<sup>-1</sup>

### Cartesian coordinates

| ATOM | X           | Y           | Z           |   |             |             |             |
|------|-------------|-------------|-------------|---|-------------|-------------|-------------|
| C    | -0.61975400 | -4.38808400 | 0.68122100  | N | 2.93335600  | -5.00610500 | -3.31895500 |
| C    | -0.84781700 | -2.99906800 | 0.80543000  | N | -5.77374600 | 0.61304500  | -4.64739300 |
| C    | -1.50404300 | -2.33436200 | -0.25313700 | N | -4.49648000 | 0.36420700  | 5.15032000  |
| C    | -1.91050800 | -3.05004900 | -1.38979600 | C | 2.23333600  | -6.27878900 | -3.25185600 |
| C    | -1.66838900 | -4.41704400 | -1.48769600 | H | 2.21167500  | -6.73188700 | -4.25122400 |
| C    | -1.02334600 | -5.09234700 | -0.45584100 | H | 2.67879200  | -7.01690000 | -2.56206200 |
| C    | -0.40214700 | -2.36900000 | 2.09195500  | H | 1.20006300  | -6.10223300 | -2.93637600 |
| C    | 0.70360300  | -1.49915800 | 2.20409600  | C | 4.30251600  | -5.05016000 | -3.80579600 |
| C    | -1.06061800 | -2.77592600 | 3.27765600  | H | 4.65888000  | -4.02933800 | -3.97919600 |
| C    | 1.14644700  | -1.08327400 | 3.46995100  | H | 5.01493300  | -5.54631600 | -3.12219200 |
| C    | -0.63682500 | -2.32226800 | 4.53008000  | H | 4.32997900  | -5.58648100 | -4.76224900 |
| C    | 0.47882600  | -1.49390000 | 4.61813800  | C | -6.18955200 | 1.99268100  | -4.85418600 |
| P    | -1.78899900 | -0.51428000 | -0.19836400 | H | -6.59456700 | 2.09968900  | -5.86768000 |
| P    | 1.43505400  | -0.71460300 | 0.70024400  | H | -6.95913800 | 2.34588100  | -4.14467100 |
| C    | -2.62124300 | -0.23400900 | 1.39944700  | H | -5.32063000 | 2.65289400  | -4.76405500 |
| C    | -2.20267500 | 0.81639700  | 2.21280400  | C | -6.78159300 | -0.39606100 | -4.94058500 |
| C    | -3.66376800 | -1.06231900 | 1.82927500  | H | -7.70004800 | -0.32325400 | -4.33318700 |
| C    | -2.77061900 | 1.03816900  | 3.47168500  | H | -7.07495100 | -0.31290900 | -5.99462400 |
| C    | -4.30940900 | -0.83233000 | 3.04369200  | H | -6.35413000 | -1.39121100 | -4.78590800 |
| C    | -3.84390500 | 0.21693800  | 3.88258700  | C | -3.82099500 | -0.25369600 | 6.28046100  |
| C    | -3.03401100 | -0.17101900 | -1.49755800 | H | -2.94477100 | 0.31314100  | 6.64517800  |
| C    | -4.38147400 | 0.02348600  | -1.20289200 | H | -4.52543700 | -0.35780000 | 7.11455200  |
| C    | -2.61069300 | -0.06096400 | -2.82971700 | H | -3.47533400 | -1.25367700 | 5.99710200  |
| C    | -5.31817100 | 0.30725900  | -2.20691600 | C | -5.18701900 | 1.61090700  | 5.44961700  |
| C    | -3.51033600 | 0.20767200  | -3.86042000 | H | -5.62849000 | 2.01110200  | 4.53259300  |
| C    | -4.88615000 | 0.37276900  | -3.54796100 | H | -6.00099200 | 1.40912900  | 6.15788200  |
| C    | 1.86829500  | -2.06201800 | -0.45845000 | H | -4.55146500 | 2.39669100  | 5.89134700  |
| C    | 1.58954000  | -1.89364400 | -1.81628800 | C | 6.75742900  | -0.42782600 | 0.46449500  |
| C    | 2.53237300  | -3.21772800 | -0.03671500 | H | 7.58552500  | 0.24523700  | 0.68731000  |
| C    | 1.95773400  | -2.85403500 | -2.76058600 | C | 6.74830600  | -0.64799500 | -1.05885000 |
| C    | 2.93533900  | -4.19576600 | -0.95367700 | H | 5.96476100  | -1.35320400 | -1.36186800 |
| C    | 2.62309600  | -4.02313100 | -2.32413700 | H | 6.57378400  | 0.29291000  | -1.58982900 |
| C    | 3.04386600  | 0.02264400  | 1.19490200  | H | 7.70909400  | -1.05998200 | -1.38816100 |
| C    | 4.25776000  | -0.45311700 | 0.70361100  | C | 7.03127700  | -1.74411100 | 1.21772200  |
| C    | 3.04649100  | 1.18169900  | 1.99003800  | H | 7.97693300  | -2.18782900 | 0.88503400  |
| C    | 5.46591100  | 0.20905100  | 0.96751100  | H | 7.09434100  | -1.57406000 | 2.29820700  |
| C    | 4.22539400  | 1.87201600  | 2.27369600  | H | 6.23537800  | -2.47481700 | 1.03977900  |
| C    | 5.44549500  | 1.39788400  | 1.72341700  | C | 4.21135800  | 3.12929000  | 3.13903900  |
| H    | -2.42688000 | -2.54538700 | -2.19646900 | H | 5.13875900  | 3.12283500  | 3.72070100  |
|      |             |             |             | C | 4.23695100  | 4.40535600  | 2.27382700  |
|      |             |             |             | H | 3.31775500  | 4.49102300  | 1.68364200  |

|   |             |             |             |                                               |             |             |             |
|---|-------------|-------------|-------------|-----------------------------------------------|-------------|-------------|-------------|
| H | 4.31325000  | 5.29503400  | 2.90994000  | H                                             | -5.94755800 | -2.81077100 | 1.61739800  |
| H | 5.08971500  | 4.40054400  | 1.59073500  | H                                             | -4.71910700 | -3.55153100 | 2.65006800  |
| C | 3.03613000  | 3.18273200  | 4.12781000  | H                                             | -6.43400100 | -3.60755400 | 3.11259100  |
| H | 2.07770500  | 3.33820600  | 3.61805300  | C                                             | -6.81704000 | -0.83777600 | 3.24969400  |
| H | 2.95847600  | 2.26304100  | 4.71941600  | H                                             | -6.93403800 | -0.54501500 | 2.19846100  |
| H | 3.17070900  | 4.02106400  | 4.81985800  | H                                             | -7.69511500 | -1.42947100 | 3.53361400  |
| C | -3.02682600 | 0.28827000  | -5.30323400 | H                                             | -6.80477200 | 0.06717200  | 3.86014600  |
| H | -3.69723000 | 0.97391300  | -5.82932600 | C                                             | -2.20550700 | 2.17262700  | 4.32116500  |
| C | -3.16180500 | -1.08864100 | -5.98370600 | H                                             | -2.61694500 | 2.08785000  | 5.32824100  |
| H | -2.53983000 | -1.83476800 | -5.47492400 | C                                             | -0.67360400 | 2.09259900  | 4.45959700  |
| H | -4.19935500 | -1.43477800 | -5.96320600 | H                                             | -0.16837800 | 2.25082200  | 3.49926400  |
| H | -2.84054700 | -1.03557700 | -7.03059700 | H                                             | -0.31496600 | 2.86710300  | 5.14681200  |
| C | -1.59196000 | 0.82390900  | -5.44187200 | H                                             | -0.35960900 | 1.11586900  | 4.83795300  |
| H | -1.36321800 | 1.00567700  | -6.49755600 | C                                             | -2.62881400 | 3.54027000  | 3.74975900  |
| H | -1.45950400 | 1.76771500  | -4.89868400 | H                                             | -2.22525200 | 3.67631300  | 2.73764400  |
| H | -0.84566900 | 0.11130800  | -5.07149400 | H                                             | -3.71834800 | 3.62964500  | 3.68919700  |
| C | -6.76762700 | 0.52330200  | -1.78340200 | H                                             | -2.25025700 | 4.35691500  | 4.37509300  |
| H | -7.34203100 | 0.83026700  | -2.65841900 | Rh                                            | 0.00000900  | 0.91257500  | -0.29560000 |
| C | -7.38735400 | -0.78488100 | -1.25442600 | Se                                            | 1.50975000  | 3.01531800  | -0.22912300 |
| H | -6.86064800 | -1.13593900 | -0.35821800 | C                                             | 3.04649200  | 2.77307000  | -1.41663400 |
| H | -8.43882100 | -0.63241200 | -0.98564000 | C                                             | 3.97261400  | 3.81647100  | -1.51998400 |
| H | -7.33735600 | -1.58076600 | -2.00535900 | C                                             | 3.23225500  | 1.57896200  | -2.11838100 |
| C | -6.89636500 | 1.65348700  | -0.74381300 | C                                             | 5.08869000  | 3.66264100  | -2.34590500 |
| H | -6.39962800 | 1.39697600  | 0.19943500  | H                                             | 3.82958600  | 4.73509300  | -0.95981600 |
| H | -6.45427200 | 2.58475800  | -1.11491400 | C                                             | 4.34988200  | 1.43687800  | -2.94205900 |
| H | -7.95244400 | 1.84124400  | -0.51936100 | H                                             | 2.52082000  | 0.76832200  | -2.01543500 |
| H | -0.83189700 | -6.15658900 | -0.53402600 | C                                             | 5.27707700  | 2.47508400  | -3.05756400 |
| H | -1.15381300 | -2.62232200 | 5.43299200  | H                                             | 5.80830100  | 4.47185700  | -2.43201000 |
| O | -2.10809500 | -3.63264100 | 3.11542400  | H                                             | 4.49794300  | 0.50763400  | -3.48366100 |
| O | 0.02694400  | -4.98570200 | 1.72313700  | H                                             | 6.14679500  | 2.35818500  | -3.69769200 |
| C | -2.67391600 | -4.23245800 | 4.27424200  | H                                             | -0.29480200 | 1.15402000  | -1.81086900 |
| H | -3.20658400 | -3.49498400 | 4.88856400  | C                                             | -1.36834900 | 6.88050800  | -0.19484900 |
| H | -3.38782500 | -4.97236400 | 3.91008600  | C                                             | -1.06585300 | 5.52856300  | -0.32587200 |
| H | -1.90741200 | -4.73204100 | 4.87985500  | C                                             | -0.33862800 | 5.05243000  | -1.43007100 |
| C | -0.31284100 | -6.33539700 | 2.02856500  | C                                             | 0.08824800  | 5.97278600  | -2.39956500 |
| H | 0.13197300  | -7.04246400 | 1.31916900  | C                                             | -0.20862400 | 7.32999000  | -2.28639200 |
| H | 0.09875400  | -6.52894400 | 3.02116000  | C                                             | -0.93523100 | 7.76229000  | -1.18226100 |
| H | -1.40154600 | -6.46569000 | 2.04583600  | H                                             | -1.92825000 | 7.26192000  | 0.65226000  |
| C | 3.69849300  | -5.41332800 | -0.44183900 | H                                             | -1.39377200 | 4.83972700  | 0.44815400  |
| H | 4.02528700  | -5.99835900 | -1.30252700 | H                                             | 0.65884500  | 5.62307300  | -3.25633300 |
| C | 4.96941100  | -5.00644100 | 0.32563400  | H                                             | 0.10930800  | 8.04971400  | -3.03299000 |
| H | 4.73191400  | -4.45035000 | 1.23973000  | F                                             | -1.22754700 | 9.06883000  | -1.06177800 |
| H | 5.53852100  | -5.89569500 | 0.61948200  | C                                             | 0.01374600  | 3.60771600  | -1.57245000 |
| H | 5.61759700  | -4.37679700 | -0.29370600 | C                                             | -1.05335100 | 2.56450500  | -1.27746400 |
| C | 2.79541800  | -6.31625000 | 0.41614600  | H                                             | -1.73396600 | 2.42848100  | -2.12288600 |
| H | 2.41331800  | -5.77618000 | 1.28786300  | H                                             | -1.66840900 | 2.80538700  | -0.40270100 |
| H | 1.93285200  | -6.66182000 | -0.16438800 | H                                             | 0.48818100  | 3.41198700  | -2.53692700 |
| H | 3.34853900  | -7.19574000 | 0.76558500  |                                               |             |             |             |
| C | 1.59380400  | -2.64117500 | -4.22372400 | <b>17</b>                                     |             |             |             |
| H | 2.12660800  | -3.40199200 | -4.79973200 | B3LYP-D3 SCF energy: -4539.858340 a.u.        |             |             |             |
| C | 0.08649000  | -2.86837000 | -4.44047100 | B3LYP-D3 enthalpy: -4537.948910 a.u.          |             |             |             |
| H | -0.50637200 | -2.15331600 | -3.85869300 | B3LYP-D3 free energy: -4538.203764 a.u.       |             |             |             |
| H | -0.17627000 | -2.74806000 | -5.49784400 | M06 SCF energy in solution: -4538.828677 a.u. |             |             |             |
| H | -0.20940000 | -3.87354400 | -4.12214700 |                                               |             |             |             |
| C | 2.02229400  | -1.25709500 | -4.74060500 | Cartesian coordinates                         |             |             |             |
| H | 1.49546200  | -0.44237800 | -4.22849400 | ATOM X Y Z                                    |             |             |             |
| H | 3.09776900  | -1.09879600 | -4.60111900 | C 0.13853300 -0.96796700 4.02489800           |             |             |             |
| H | 1.80300400  | -1.16524900 | -5.81036900 | C -0.23457200 -0.31203400 2.83189800          |             |             |             |
| C | -5.52705000 | -1.66462100 | 3.43663900  | C -1.01981000 -1.00975400 1.89303600          |             |             |             |
| H | -5.44046200 | -1.89749300 | 4.50407500  | C -1.42979000 -2.32540600 2.16451300          |             |             |             |
| C | -5.65430900 | -2.98546300 | 2.66039100  | C -1.06962100 -2.94146100 3.35955700          |             |             |             |

|   |             |             |             |   |             |             |             |
|---|-------------|-------------|-------------|---|-------------|-------------|-------------|
| C | -0.28184700 | -2.27326300 | 4.29117600  | C | 5.23267800  | -4.82914400 | 3.27264300  |
| C | 0.16673400  | 1.11938700  | 2.68893000  | H | 5.43108900  | -4.82856500 | 2.19568200  |
| C | 1.12188100  | 1.57528600  | 1.75899500  | H | 6.02544000  | -4.23697500 | 3.76357200  |
| C | -0.39263100 | 2.04479500  | 3.60440500  | H | 5.31564600  | -5.86181600 | 3.63246500  |
| C | 1.52284000  | 2.92155900  | 1.77890700  | C | -6.34079800 | -3.93787700 | -2.92719800 |
| C | -0.02357000 | 3.39175700  | 3.57842100  | H | -6.57047400 | -4.81711600 | -3.54244200 |
| C | 0.94798600  | 3.81488900  | 2.67586000  | H | -7.29907100 | -3.52106600 | -2.57291700 |
| P | -1.57153800 | -0.18825600 | 0.32943100  | H | -5.86480600 | -3.18983700 | -3.56764900 |
| P | 1.75942300  | 0.42893800  | 0.44504000  | C | -5.91083500 | -5.33353900 | -0.94448900 |
| C | -2.48162700 | 1.27589300  | 0.91446500  | H | -6.73338000 | -4.98503900 | -0.29408300 |
| C | -2.35795200 | 2.51692400  | 0.29887700  | H | -6.27606900 | -6.19827500 | -1.51156100 |
| C | -3.32397500 | 1.14148300  | 2.02679100  | H | -5.09209800 | -5.67122000 | -0.30039100 |
| C | -3.02327200 | 3.64426400  | 0.79399100  | C | -3.93615200 | 5.46314500  | 3.35099600  |
| C | -4.06047600 | 2.22271700  | 2.50872700  | H | -3.24603200 | 6.16545200  | 2.84865200  |
| C | -3.89826300 | 3.49226900  | 1.89212200  | H | -4.65739800 | 6.05578600  | 3.92655800  |
| C | -2.78417000 | -1.37133800 | -0.35219300 | H | -3.34867300 | 4.86660500  | 4.05666700  |
| C | -4.15476100 | -1.22553400 | -0.15865900 | C | -5.63593800 | 5.24216200  | 1.59568700  |
| C | -2.30176100 | -2.49998900 | -1.02994100 | H | -6.09365700 | 4.50625600  | 0.92891000  |
| C | -5.05785500 | -2.19587100 | -0.61206900 | H | -6.42634400 | 5.66684700  | 2.22791500  |
| C | -3.16961700 | -3.47716900 | -1.51653700 | H | -5.23317000 | 6.05867900  | 0.97378900  |
| C | -4.56559800 | -3.31450900 | -1.31846900 | C | 6.87955200  | 0.49447300  | -1.02703000 |
| C | 2.42422600  | -1.01417900 | 1.34579200  | H | 7.53695000  | 1.00524800  | -1.73281200 |
| C | 2.13736500  | -2.32063300 | 0.93589600  | C | 6.67463000  | -0.93391700 | -1.56917000 |
| C | 3.25663800  | -0.80432600 | 2.44911500  | H | 6.08506700  | -1.55129300 | -0.88099300 |
| C | 2.64139000  | -3.42058600 | 1.64050800  | H | 6.16047000  | -0.91967800 | -2.53694900 |
| C | 3.80741000  | -1.87582900 | 3.15758300  | H | 7.64314600  | -1.42815900 | -1.70446100 |
| C | 3.45837400  | -3.19187100 | 2.77617500  | C | 7.58069100  | 0.46825600  | 0.34346100  |
| C | 3.22097000  | 1.27162800  | -0.27629300 | H | 8.53578700  | -0.06560700 | 0.28021100  |
| C | 4.48510500  | 0.67684400  | -0.28847200 | H | 7.77890000  | 1.48091500  | 0.70973400  |
| C | 3.05021400  | 2.48703500  | -0.95511600 | H | 6.95845800  | -0.04027600 | 1.08787800  |
| C | 5.56491100  | 1.26472400  | -0.96244300 | C | 3.86785600  | 4.49123100  | -2.23374200 |
| C | 4.11537100  | 3.14228500  | -1.57221700 | H | 4.84146400  | 4.86127800  | -2.56581100 |
| C | 5.39382200  | 2.52770200  | -1.57431900 | C | 2.95620400  | 4.35275900  | -3.46750700 |
| H | -2.04741500 | -2.86471800 | 1.45881800  | H | 1.95019900  | 4.01434100  | -3.19250700 |
| H | -1.40170800 | -3.95483500 | 3.56241500  | H | 2.84797100  | 5.31810600  | -3.97520200 |
| H | 2.29735200  | 3.27927800  | 1.11661200  | H | 3.36117400  | 3.63560700  | -4.19056200 |
| H | 1.26474400  | 4.85390100  | 2.67568600  | C | 3.28652700  | 5.51156800  | -1.23706600 |
| H | -1.72884000 | 2.61530300  | -0.57475600 | H | 2.28920500  | 5.21539600  | -0.88620500 |
| H | -3.39906900 | 0.17903300  | 2.51738200  | H | 3.93377100  | 5.62160500  | -0.35978800 |
| H | -4.53611400 | -0.35140800 | 0.35519400  | H | 3.18801200  | 6.49411200  | -1.71233500 |
| H | -1.23231800 | -2.61428900 | -1.18083700 | C | -2.62874500 | -4.66591000 | -2.30201100 |
| H | 1.48802700  | -2.48057300 | 0.07900800  | H | -3.28871500 | -5.51684700 | -2.10839800 |
| H | 3.48298600  | 0.21159800  | 2.75938500  | C | -1.20222000 | -5.06662400 | -1.89730200 |
| H | 4.63427300  | -0.27372600 | 0.21103000  | H | -0.47032100 | -4.29604800 | -2.16065100 |
| H | 2.06495100  | 2.94156900  | -0.99991000 | H | -1.12262800 | -5.25540000 | -0.82032400 |
| N | 6.45755500  | 3.22928700  | -2.21919400 | H | -0.90421800 | -5.97743700 | -2.42788000 |
| C | 7.62643100  | 3.60999600  | -1.44122100 | C | -2.70394000 | -4.35787300 | -3.81139200 |
| H | 7.31818600  | 3.85288400  | -0.42025300 | H | -2.23334800 | -5.15800500 | -4.39543800 |
| H | 8.41710200  | 2.84273400  | -1.38734000 | H | -3.74304400 | -4.25648200 | -4.13586400 |
| H | 8.07160700  | 4.51043200  | -1.88341700 | H | -2.18352500 | -3.42019300 | -4.03192200 |
| C | 6.70430900  | 2.90572200  | -3.61579000 | C | -6.53572500 | -1.99384000 | -0.29454500 |
| H | 5.75107700  | 2.81877500  | -4.14677400 | H | -7.08912400 | -2.86175100 | -0.65491800 |
| H | 7.28031100  | 3.71434400  | -4.08150300 | C | -6.77097100 | -1.91633600 | 1.22686900  |
| H | 7.26310400  | 1.96362800  | -3.76288100 | H | -6.27207400 | -1.04589100 | 1.66892600  |
| N | 3.88313200  | -4.34311000 | 3.51478400  | H | -7.84181600 | -1.82877000 | 1.44262900  |
| N | -5.41630300 | -4.32634000 | -1.87081400 | H | -6.39181800 | -2.81185300 | 1.73198100  |
| N | -4.65216500 | 4.58091800  | 2.44417100  | C | -7.09916900 | -0.75140300 | -1.00926900 |
| C | 3.38152200  | -4.48972300 | 4.87181100  | H | -6.59903900 | 0.16342400  | -0.66969800 |
| H | 3.41484800  | -5.54934700 | 5.15474900  | H | -6.96227000 | -0.82289400 | -2.09351200 |
| H | 3.93968600  | -3.92318800 | 5.63760300  | H | -8.17036200 | -0.64381200 | -0.80390800 |
| H | 2.33710500  | -4.16277500 | 4.90324200  | H | 0.00137000  | -2.76171500 | 5.21662600  |

|    |             |             |             |
|----|-------------|-------------|-------------|
| H  | -0.46850800 | 4.10385100  | 4.26208400  |
| O  | -1.28742500 | 1.53560400  | 4.49500500  |
| O  | 0.92027800  | -0.25592000 | 4.88408600  |
| C  | -1.76189600 | 2.37971400  | 5.53692700  |
| H  | -2.39545100 | 3.18235100  | 5.14116100  |
| H  | -2.36184500 | 1.74298700  | 6.18777100  |
| H  | -0.93244500 | 2.81132700  | 6.11083500  |
| C  | 0.73599000  | -0.47644500 | 6.27935100  |
| H  | 1.14899200  | -1.43879400 | 6.60480600  |
| H  | 1.27985700  | 0.32461100  | 6.78283600  |
| H  | -0.32804800 | -0.42775600 | 6.53963700  |
| C  | 4.78701200  | -1.57704400 | 4.28891800  |
| H  | 5.16550200  | -2.52467600 | 4.67434500  |
| C  | 6.00645900  | -0.79432400 | 3.76610500  |
| H  | 5.72162200  | 0.18811900  | 3.37236700  |
| H  | 6.73056900  | -0.63222300 | 4.57251300  |
| H  | 6.50950900  | -1.34570900 | 2.96417600  |
| C  | 4.11078600  | -0.84421700 | 5.45997100  |
| H  | 3.64584400  | 0.09263700  | 5.13585500  |
| H  | 3.32634800  | -1.46622400 | 5.90022500  |
| H  | 4.84429500  | -0.61422300 | 6.24116300  |
| C  | 2.28564600  | -4.84470800 | 1.22735000  |
| H  | 3.01317300  | -5.50399000 | 1.70594500  |
| C  | 0.89756100  | -5.23801100 | 1.76369900  |
| H  | 0.11900000  | -4.59915700 | 1.33216900  |
| H  | 0.66876100  | -6.27964100 | 1.50929900  |
| H  | 0.85279500  | -5.13046900 | 2.85206400  |
| C  | 2.35607100  | -5.06859400 | -0.28821500 |
| H  | 1.57817400  | -4.51261900 | -0.81911400 |
| H  | 3.32898400  | -4.76625400 | -0.69390400 |
| H  | 2.20633800  | -6.12950300 | -0.51909000 |
| C  | -5.04829900 | 2.02883600  | 3.65677400  |
| H  | -4.94451100 | 2.88821600  | 4.32937500  |
| C  | -4.80911200 | 0.74615400  | 4.47111300  |
| H  | -5.09596300 | -0.14811700 | 3.90359900  |
| H  | -3.76187900 | 0.62875100  | 4.76469500  |
| H  | -5.42572200 | 0.76206700  | 5.37616200  |
| C  | -6.49807100 | 2.03506500  | 3.12805400  |
| H  | -6.64877800 | 1.21770900  | 2.41222100  |
| H  | -7.20597600 | 1.89412800  | 3.95318600  |
| H  | -6.73769800 | 2.97672000  | 2.63116500  |
| C  | -2.76947400 | 4.98238400  | 0.10639800  |
| H  | -3.22774000 | 5.76977800  | 0.70667500  |
| C  | -1.26587700 | 5.31286000  | 0.03058800  |
| H  | -0.72080800 | 4.60347900  | -0.60289500 |
| H  | -1.12058600 | 6.31250200  | -0.39454400 |
| H  | -0.80528800 | 5.28490900  | 1.02309400  |
| C  | -3.41946800 | 5.01683000  | -1.29054100 |
| H  | -2.99682700 | 4.24697400  | -1.94513200 |
| H  | -4.49909800 | 4.84524000  | -1.22769800 |
| H  | -3.25519300 | 5.99009400  | -1.76761100 |
| Rh | 0.10452600  | 0.15513000  | -1.26252500 |
| C  | 0.33884900  | -3.11325100 | -5.00625400 |
| C  | 0.62531900  | -1.87531600 | -4.45106600 |
| C  | 1.60021800  | -1.74654400 | -3.43741900 |
| C  | 2.27483100  | -2.90314000 | -3.00196900 |
| C  | 1.99408900  | -4.15187700 | -3.54929000 |
| C  | 1.01893300  | -4.23653500 | -4.53649100 |
| H  | -0.41091900 | -3.23080600 | -5.77997400 |
| H  | 0.07934800  | -1.00497400 | -4.79381200 |
| H  | 3.02837000  | -2.81870300 | -2.22389100 |

|    |             |             |             |
|----|-------------|-------------|-------------|
| H  | 2.49611100  | -5.05098300 | -3.21148500 |
| F  | 0.69981200  | -5.44066100 | -5.03743800 |
| C  | 1.98601700  | -0.45302900 | -2.86951600 |
| H  | 2.83206700  | -0.48009600 | -2.18649400 |
| C  | 1.48373900  | 0.76978700  | -3.22023100 |
| H  | 1.96825500  | 1.66903000  | -2.86927000 |
| H  | 0.77264800  | 0.89353400  | -4.02468500 |
| C  | -1.41695800 | 1.91299700  | -4.05347900 |
| C  | -1.60925500 | 1.78937900  | -5.43713100 |
| C  | -1.32972500 | 2.86101900  | -6.29022100 |
| C  | -0.84828900 | 4.06636800  | -5.77668600 |
| C  | -0.65131900 | 4.19477800  | -4.39939700 |
| C  | -0.93323700 | 3.12794400  | -3.54538000 |
| H  | -1.98192600 | 0.85516400  | -5.84833900 |
| H  | -1.48559100 | 2.74807600  | -7.35981400 |
| H  | -0.62986100 | 4.89723500  | -6.44115300 |
| H  | -0.27983300 | 5.12820200  | -3.98470300 |
| H  | -0.76868700 | 3.23909100  | -2.47952200 |
| Se | -1.89300300 | 0.40060300  | -2.89767900 |
| H  | -0.03872100 | 1.64992600  | -1.05118900 |

### 18-ts-R

B3LYP-D3 SCF energy: -4539.839904 a.u.

B3LYP-D3 enthalpy: -4537.932006 a.u.

B3LYP-D3 free energy: -4538.183208 a.u.

M06 SCF energy in solution: -4538.813095 a.u.

Imaginary frequency: -920.82 cm<sup>-1</sup>

### Cartesian coordinates

| ATOM | X           | Y           | Z           |
|------|-------------|-------------|-------------|
| C    | 0.22922100  | -1.10405600 | 4.04103300  |
| C    | -0.15545800 | -0.40121400 | 2.87735800  |
| C    | -1.03974200 | -1.02435200 | 1.97489900  |
| C    | -1.54699500 | -2.30183400 | 2.26134200  |
| C    | -1.18234800 | -2.95694900 | 3.43367800  |
| C    | -0.28725700 | -2.37096200 | 4.32256200  |
| C    | 0.33090500  | 1.00641600  | 2.74687600  |
| C    | 1.25451600  | 1.44212000  | 1.77519200  |
| C    | -0.11344000 | 1.92969500  | 3.72671200  |
| C    | 1.75275100  | 2.75495900  | 1.83221900  |
| C    | 0.35295200  | 3.24599200  | 3.74003200  |
| C    | 1.30314600  | 3.64112900  | 2.80378100  |
| P    | -1.56600300 | -0.16672300 | 0.42310800  |
| P    | 1.75984900  | 0.31545400  | 0.38740200  |
| C    | -2.27202400 | 1.40358000  | 1.01506500  |
| C    | -1.96075800 | 2.60702900  | 0.38947200  |
| C    | -3.10844600 | 1.40238700  | 2.13760700  |
| C    | -2.44126600 | 3.82541500  | 0.88200900  |
| C    | -3.65463000 | 2.58823100  | 2.62705100  |
| C    | -3.30235000 | 3.81475200  | 2.00269100  |
| C    | -2.92911500 | -1.21225500 | -0.19659700 |
| C    | -4.26874400 | -0.92510700 | 0.04901400  |
| C    | -2.59320800 | -2.37898200 | -0.89649900 |
| C    | -5.28526600 | -1.79114800 | -0.37505600 |
| C    | -3.57547000 | -3.26257600 | -1.34202900 |
| C    | -4.93858700 | -2.95526000 | -1.09460900 |
| C    | 2.39624200  | -1.17998900 | 1.22884500  |
| C    | 1.99641100  | -2.46847300 | 0.85365500  |
| C    | 3.31019000  | -1.01937300 | 2.27405000  |
| C    | 2.46945900  | -3.59413400 | 1.54076800  |
| C    | 3.83237100  | -2.11861400 | 2.96065100  |

|   |             |             |             |   |             |             |             |
|---|-------------|-------------|-------------|---|-------------|-------------|-------------|
| C | 3.37013000  | -3.41008500 | 2.62100600  | C | 7.57517600  | 0.09811900  | -0.04469900 |
| C | 3.23173100  | 1.11530600  | -0.36732300 | H | 8.50219000  | -0.46983800 | -0.18340600 |
| C | 4.46128400  | 0.46347600  | -0.48308200 | H | 7.83565000  | 1.08744000  | 0.34574000  |
| C | 3.08078100  | 2.36349400  | -0.98961200 | H | 6.97624700  | -0.41428800 | 0.71583200  |
| C | 5.52632300  | 1.02783000  | -1.20183200 | C | 3.89753000  | 4.36281800  | -2.26938600 |
| C | 4.13275100  | 2.98921700  | -1.65626400 | H | 4.85495100  | 4.69481300  | -2.67938000 |
| C | 5.37808900  | 2.31774700  | -1.76060800 | C | 2.87571100  | 4.28853600  | -3.41998800 |
| H | -2.24215100 | -2.77983600 | 1.58378000  | H | 1.88872500  | 3.96807200  | -3.06472000 |
| H | -1.59127500 | -3.93901900 | 3.65015800  | H | 2.75214000  | 5.27117600  | -3.88950500 |
| H | 2.50946000  | 3.09151400  | 1.13965600  | H | 3.19277400  | 3.58285600  | -4.19675400 |
| H | 1.69896200  | 4.65232700  | 2.83298700  | C | 3.45294900  | 5.38628200  | -1.20765800 |
| H | -1.31891700 | 2.59285600  | -0.48219500 | H | 2.47837900  | 5.12609900  | -0.77515300 |
| H | -3.32223200 | 0.46439800  | 2.63533800  | H | 4.17974000  | 5.44838900  | -0.39008700 |
| H | -4.53718000 | -0.01671600 | 0.57478500  | H | 3.35831900  | 6.38237500  | -1.65472900 |
| H | -1.54840900 | -2.59050400 | -1.10328300 | C | -3.18674500 | -4.49872400 | -2.14351700 |
| H | 1.28044700  | -2.58759800 | 0.04478700  | H | -3.94441400 | -5.26494500 | -1.95539800 |
| H | 3.62325600  | -0.01869000 | 2.55738000  | C | -1.81686100 | -5.07360800 | -1.75018400 |
| H | 4.59473500  | -0.51128400 | -0.02713000 | H | -0.99643200 | -4.40361100 | -2.02806200 |
| H | 2.11655900  | 2.86288300  | -0.95855000 | H | -1.74893100 | -5.26179500 | -0.67206600 |
| N | 6.42991100  | 2.99322100  | -2.45237900 | H | -1.64411200 | -6.02001700 | -2.27437800 |
| C | 7.65605500  | 3.30643200  | -1.73413500 | C | -3.22935400 | -4.16604100 | -3.64877300 |
| H | 7.41489200  | 3.54591700  | -0.69444900 | H | -2.86673500 | -5.01083300 | -4.24683200 |
| H | 8.41149700  | 2.50269500  | -1.73421700 | H | -4.24911900 | -3.92873300 | -3.96509000 |
| H | 8.11823800  | 4.19279400  | -2.18694700 | H | -2.59561600 | -3.29864800 | -3.86182900 |
| C | 6.58304900  | 2.68982900  | -3.86671600 | C | -6.72386900 | -1.42330400 | -0.02713200 |
| H | 5.59846600  | 2.66245600  | -4.34490500 | H | -7.37438500 | -2.24270000 | -0.33598200 |
| H | 7.17172800  | 3.48032200  | -4.34730900 | C | -6.91146300 | -1.25545200 | 1.49349600  |
| H | 7.08493800  | 1.72554200  | -4.06564000 | H | -6.32986900 | -0.41158100 | 1.88339800  |
| N | 3.75755900  | -4.57938600 | 3.35242500  | H | -7.96497600 | -1.06435500 | 1.72692200  |
| N | -5.90985800 | -3.87011300 | -1.61734300 | H | -6.59883200 | -2.15635300 | 2.03326800  |
| N | -3.83797800 | 5.01055300  | 2.58774600  | C | -7.17216900 | -0.15855100 | -0.78369400 |
| C | 3.33223700  | -4.66960200 | 4.74017100  | H | -6.56251300 | 0.70774400  | -0.50026800 |
| H | 3.30346600  | -5.72485500 | 5.03965700  | H | -7.07864400 | -0.29109500 | -1.86674200 |
| H | 3.97848000  | -4.13706500 | 5.45974900  | H | -8.21800000 | 0.07636000  | -0.55465300 |
| H | 2.31958300  | -4.26334900 | 4.82976700  | H | 0.00138200  | -2.89256800 | 5.22786700  |
| C | 5.05312300  | -5.16268000 | 3.04040100  | H | 0.00040600  | 3.95359800  | 4.47978900  |
| H | 5.18756800  | -5.18961900 | 1.95394100  | O | -0.99957100 | 1.44930500  | 4.64201800  |
| H | 5.91296400  | -4.62213400 | 3.47474100  | O | 1.11392600  | -0.47066400 | 4.86138800  |
| H | 5.08483800  | -6.19409100 | 3.41195000  | C | -1.33669600 | 2.26879300  | 5.75479200  |
| C | -6.81801800 | -3.38552500 | -2.64730500 | H | -1.92560800 | 3.14097200  | 5.44533600  |
| H | -7.16280700 | -4.23592900 | -3.24929300 | H | -1.94551900 | 1.64544700  | 6.41067300  |
| H | -7.71267600 | -2.86354700 | -2.26685800 | H | -0.43980200 | 2.59948100  | 6.29336800  |
| H | -6.28211700 | -2.69722900 | -3.30723700 | C | 1.02473700  | -0.73404400 | 6.25766700  |
| C | -6.48037300 | -4.81950300 | -0.67411600 | H | 1.40462300  | -1.73029400 | 6.51572600  |
| H | -7.24123200 | -4.38664200 | 0.00037600  | H | 1.65163700  | 0.01524400  | 6.74399200  |
| H | -6.95256500 | -5.64016500 | -1.22770200 | H | -0.01131300 | -0.63762400 | 6.60402200  |
| H | -5.68283300 | -5.24269400 | -0.05441700 | C | 4.90120200  | -1.87394900 | 4.02209700  |
| C | -2.94309500 | 5.73605600  | 3.47411300  | H | 5.23941200  | -2.84010100 | 4.39890300  |
| H | -2.16183900 | 6.31788200  | 2.95097900  | C | 6.13356100  | -1.18311000 | 3.40797700  |
| H | -3.52527400 | 6.43326800  | 4.08887000  | H | 5.89085100  | -0.18624000 | 3.02235400  |
| H | -2.43927600 | 5.03047300  | 4.14312600  | H | 6.92068800  | -1.06552200 | 4.16130700  |
| C | -4.72735500 | 5.84805800  | 1.79449300  | H | 6.54095600  | -1.77456600 | 2.58058500  |
| H | -5.33211600 | 5.21688300  | 1.13775100  | C | 4.35479800  | -1.08037700 | 5.22120500  |
| H | -5.40685600 | 6.38733000  | 2.46722400  | H | 3.92639100  | -0.12173100 | 4.91010900  |
| H | -4.21626800 | 6.59812700  | 1.16816300  | H | 3.56714900  | -1.64408100 | 5.72806400  |
| C | 6.79928600  | 0.20504000  | -1.37030800 | H | 5.15415500  | -0.88267800 | 5.94454400  |
| H | 7.43844300  | 0.71384900  | -2.09395700 | C | 1.99834300  | -5.00085400 | 1.18177200  |
| C | 6.50125800  | -1.19184900 | -1.94952200 | H | 2.73558200  | -5.69366600 | 1.59342800  |
| H | 5.92251900  | -1.80849000 | -1.25170600 | C | 0.65429200  | -5.31989800 | 1.86021900  |
| H | 5.93682700  | -1.11954300 | -2.88623200 | H | -0.13587400 | -4.66296200 | 1.48113600  |
| H | 7.43777200  | -1.72194400 | -2.15564400 | H | 0.36320700  | -6.35843700 | 1.66295500  |



|    |             |             |             |
|----|-------------|-------------|-------------|
| H  | 0.71658700  | -5.17826000 | 2.94351600  |
| C  | 1.89934200  | -5.25080200 | -0.32750400 |
| H  | 1.10120000  | -4.66022600 | -0.78682000 |
| H  | 2.84122900  | -5.01530500 | -0.83721600 |
| H  | 1.66710600  | -6.30504200 | -0.51696000 |
| C  | -4.64195400 | 2.55610200  | 3.79097500  |
| H  | -4.39653500 | 3.39299300  | 4.45497200  |
| C  | -4.59354100 | 1.25611000  | 4.61111300  |
| H  | -5.02546900 | 0.41466800  | 4.05481000  |
| H  | -3.57282000 | 0.97890300  | 4.88894000  |
| H  | -5.18526100 | 1.37270100  | 5.52540200  |
| C  | -6.08030900 | 2.78372700  | 3.28039900  |
| H  | -6.36608500 | 1.99228700  | 2.57629100  |
| H  | -6.79035200 | 2.76374800  | 4.11545500  |
| H  | -6.17746500 | 3.74589400  | 2.77414500  |
| C  | -2.03514800 | 5.10561900  | 0.15708500  |
| H  | -2.28662000 | 5.95574200  | 0.79405300  |
| C  | -0.51791900 | 5.18714300  | -0.09924100 |
| H  | -0.17519500 | 4.41127200  | -0.79423800 |
| H  | -0.26287900 | 6.15646000  | -0.54239700 |
| H  | 0.04752200  | 5.06753800  | 0.82939000  |
| C  | -2.82291600 | 5.25116800  | -1.16055800 |
| H  | -2.61911600 | 4.41174700  | -1.83415300 |
| H  | -3.90185800 | 5.27291500  | -0.97845300 |
| H  | -2.54484100 | 6.17703800  | -1.67785900 |
| Rh | 0.09880000  | 0.11792900  | -1.31611200 |
| C  | -0.17598800 | -3.01013100 | -5.03414600 |
| C  | 0.23947100  | -1.83819600 | -4.42346000 |
| C  | 1.19118100  | -1.86652000 | -3.38047400 |
| C  | 1.72591200  | -3.10953100 | -2.99023400 |
| C  | 1.31235000  | -4.29455700 | -3.58984000 |
| C  | 0.35306000  | -4.22501100 | -4.59427200 |
| H  | -0.91455200 | -3.00881600 | -5.82769600 |
| H  | -0.19019200 | -0.89707800 | -4.74271100 |
| H  | 2.47058200  | -3.14011700 | -2.20138700 |
| H  | 1.70139400  | -5.25822300 | -3.28211500 |
| F  | -0.09409900 | -5.36099500 | -5.14905300 |
| C  | 1.69411200  | -0.66595000 | -2.72260700 |
| H  | 2.58683100  | -0.82090300 | -2.12179800 |
| C  | 1.41080700  | 0.66912900  | -3.10586400 |
| H  | 2.19503200  | 1.39928000  | -2.93240400 |
| H  | 0.79108000  | 0.86508800  | -3.97242600 |
| C  | -1.45028800 | 1.79807500  | -4.13014200 |
| C  | -1.61789400 | 1.47826000  | -5.48509800 |
| C  | -1.25185900 | 2.39102100  | -6.47960200 |
| C  | -0.71135000 | 3.63067200  | -6.13460900 |
| C  | -0.54675900 | 3.95786100  | -4.78566200 |
| C  | -0.91632200 | 3.05100700  | -3.79188900 |
| H  | -2.04062700 | 0.51645300  | -5.76314200 |
| H  | -1.38745000 | 2.12747900  | -7.52514800 |
| H  | -0.42484100 | 4.33741200  | -6.90792900 |
| H  | -0.13285500 | 4.92227400  | -4.50371200 |
| H  | -0.78725100 | 3.31576800  | -2.74785500 |
| Se | -2.00705100 | 0.50005700  | -2.76762900 |
| H  | 0.55723600  | 1.46613500  | -2.01265400 |

Cartesian coordinates

| ATOM | X           | Y           | Z           |
|------|-------------|-------------|-------------|
| C    | -0.26313300 | -1.63447300 | 3.77216500  |
| C    | -0.50261000 | -0.77609900 | 2.67484900  |
| C    | -1.17188500 | -1.30147300 | 1.54779400  |
| C    | -1.62156800 | -2.63074400 | 1.55478500  |
| C    | -1.41564500 | -3.43797000 | 2.66950400  |
| C    | -0.72804400 | -2.95193500 | 3.77572600  |
| C    | -0.09025100 | 0.65396900  | 2.84236800  |
| C    | 0.94215700  | 1.26944400  | 2.10499500  |
| C    | -0.71873100 | 1.39907400  | 3.87059500  |
| C    | 1.35033800  | 2.57704200  | 2.41194400  |
| C    | -0.33022500 | 2.71378000  | 4.14402900  |
| C    | 0.71554100  | 3.28640500  | 3.42507700  |
| P    | -1.55660500 | -0.23317300 | 0.08858500  |
| P    | 1.66535600  | 0.38136900  | 0.66173000  |
| C    | -2.48949800 | 1.13536500  | 0.87508300  |
| C    | -2.26291100 | 2.47314600  | 0.56398900  |
| C    | -3.44628700 | 0.81364900  | 1.84837300  |
| C    | -2.96722300 | 3.50114400  | 1.20265800  |
| C    | -4.20225700 | 1.80305900  | 2.47600300  |
| C    | -3.95827000 | 3.16356800  | 2.14959800  |
| C    | -2.73776800 | -1.21683900 | -0.89489300 |
| C    | -4.11288500 | -1.02758900 | -0.78005300 |
| C    | -2.24847300 | -2.27742600 | -1.67151500 |
| C    | -5.01984100 | -1.89871300 | -1.39693700 |
| C    | -3.12193700 | -3.18005200 | -2.28257100 |
| C    | -4.52243400 | -2.97747300 | -2.15687400 |
| C    | 2.24068500  | -1.21530500 | 1.35470500  |
| C    | 1.99369700  | -2.45604700 | 0.75424300  |
| C    | 3.00107100  | -1.15553500 | 2.52646200  |
| C    | 2.47103600  | -3.63838800 | 1.33817600  |
| C    | 3.52017500  | -2.30733400 | 3.12168600  |
| C    | 3.21542900  | -3.56013700 | 2.54395900  |
| C    | 3.20998500  | 1.23378800  | 0.16049300  |
| C    | 4.39853100  | 0.51686000  | 0.01706200  |
| C    | 3.16841000  | 2.56254600  | -0.29203100 |
| C    | 5.54185100  | 1.09431400  | -0.55454100 |
| C    | 4.28779700  | 3.18052300  | -0.84695300 |
| C    | 5.48440800  | 2.43069300  | -1.00252000 |
| H    | -2.15411100 | -3.03318400 | 0.70317300  |
| H    | -1.78239200 | -4.45955900 | 2.66900000  |
| H    | 2.17589500  | 3.03542400  | 1.88534100  |
| H    | 1.03786900  | 4.29667900  | 3.65959900  |
| H    | -1.52774800 | 2.72815800  | -0.18719200 |
| H    | -3.59644400 | -0.22449900 | 2.11695900  |
| H    | -4.49664300 | -0.20468200 | -0.19025400 |
| H    | -1.17608300 | -2.40683200 | -1.77227500 |
| H    | 1.39623900  | -2.50203400 | -0.15180600 |
| H    | 3.19648300  | -0.19042400 | 2.98439700  |
| H    | 4.44586000  | -0.51301700 | 0.34989100  |
| H    | 2.23368900  | 3.11082200  | -0.24843200 |
| N    | 6.58584600  | 3.09659500  | -1.62968600 |
| C    | 7.61177200  | 3.62205400  | -0.74037600 |
| H    | 7.13792100  | 4.12738900  | 0.10742600  |
| H    | 8.29576000  | 2.85296600  | -0.33867400 |
| H    | 8.21661100  | 4.35930100  | -1.28167400 |
| C    | 7.06570400  | 2.59402600  | -2.90889800 |
| H    | 6.21855700  | 2.22936300  | -3.49747100 |
| H    | 7.53373300  | 3.41692300  | -3.46386100 |

**19-R**

B3LYP-D3 SCF energy: -4539.861470 a.u.

B3LYP-D3 enthalpy: -4537.949071 a.u.

B3LYP-D3 free energy: -4538.200754 a.u.

M06 SCF energy in solution: -4538.833756 a.u.

|   |             |             |             |    |             |             |             |
|---|-------------|-------------|-------------|----|-------------|-------------|-------------|
| H | 7.80564000  | 1.77893600  | -2.83787300 | H  | -6.31682100 | -1.14598500 | 0.97011200  |
| N | 3.61553600  | -4.79727200 | 3.14548800  | H  | -7.92282700 | -1.72993800 | 0.50737000  |
| N | -5.37348300 | -3.92096500 | -2.82157300 | H  | -6.57340200 | -2.87236000 | 0.67300100  |
| N | -4.75290400 | 4.14655200  | 2.83077300  | C  | -6.95539100 | -0.27478500 | -1.64333000 |
| C | 3.02927500  | -5.13737500 | 4.43191000  | H  | -6.45804300 | 0.52957100  | -1.08856100 |
| H | 3.06119500  | -6.22609100 | 4.56551000  | H  | -6.72605100 | -0.13856400 | -2.70564300 |
| H | 3.52734400  | -4.68036700 | 5.30477600  | H  | -8.03594100 | -0.15368700 | -1.50646400 |
| H | 1.97974800  | -4.82554300 | 4.43966000  | H  | -0.55629300 | -3.59160500 | 4.63369800  |
| C | 4.98925100  | -5.22587300 | 2.93335800  | H  | -0.82332300 | 3.28654900  | 4.91945700  |
| H | 5.25822500  | -5.07633900 | 1.88237100  | O  | -1.69666300 | 0.75560600  | 4.56376300  |
| H | 5.73374200  | -4.69429000 | 3.55248100  | O  | 0.43489700  | -1.09953400 | 4.81149500  |
| H | 5.07294100  | -6.29652500 | 3.15593900  | C  | -2.24255500 | 1.38488800  | 5.71657200  |
| C | -6.18797300 | -3.43887800 | -3.92899000 | H  | -2.82414500 | 2.27450900  | 5.44781000  |
| H | -6.41109700 | -4.27703400 | -4.60145200 | H  | -2.90921200 | 0.65054900  | 6.16972500  |
| H | -7.15008600 | -2.98720100 | -3.63173400 | H  | -1.45717300 | 1.65806500  | 6.43225000  |
| H | -5.62612300 | -2.68974100 | -4.49395600 | C  | 0.15872400  | -1.58969700 | 6.11933900  |
| C | -6.00012700 | -4.93141500 | -1.98250200 | H  | 0.56870200  | -2.59442200 | 6.27901900  |
| H | -6.86372000 | -4.56487300 | -1.39899600 | H  | 0.64984300  | -0.89906300 | 6.80677100  |
| H | -6.34953600 | -5.75794800 | -2.61312500 | H  | -0.92154800 | -1.60113000 | 6.30787200  |
| H | -5.26243100 | -5.33071800 | -1.27861000 | C  | 4.40355100  | -2.15370600 | 4.35715100  |
| C | -4.10499600 | 4.85474600  | 3.92278000  | H  | 4.79047800  | -3.13730200 | 4.62710300  |
| H | -3.38891000 | 5.63233500  | 3.59997200  | C  | 5.62578900  | -1.26307200 | 4.06344500  |
| H | -4.86806000 | 5.33957400  | 4.54366800  | H  | 5.33220100  | -0.24172800 | 3.79517800  |
| H | -3.56070800 | 4.14158300  | 4.55026700  | H  | 6.27076300  | -1.20212100 | 4.94730200  |
| C | -5.66814600 | 4.95646300  | 2.03525600  | H  | 6.21888000  | -1.66802500 | 3.23715700  |
| H | -6.08124300 | 4.34897500  | 1.22536600  | C  | 3.60796100  | -1.62663500 | 5.56420000  |
| H | -6.49920400 | 5.28797600  | 2.67092000  | H  | 3.12976300  | -0.66668900 | 5.34257200  |
| H | -5.21404700 | 5.85517200  | 1.58546600  | H  | 2.81932600  | -2.33099900 | 5.84279700  |
| C | 6.78764000  | 0.22646200  | -0.69562500 | H  | 4.26862500  | -1.49296600 | 6.42846000  |
| H | 7.61980400  | 0.86550000  | -0.99478000 | C  | 2.16907700  | -5.00652600 | 0.73121000  |
| C | 6.58358700  | -0.83153200 | -1.79849700 | H  | 2.89745600  | -5.70153800 | 1.15451300  |
| H | 5.75981600  | -1.50849300 | -1.53860700 | C  | 0.77657100  | -5.50284200 | 1.15849600  |
| H | 6.34433400  | -0.36473900 | -2.75998300 | H  | -0.00592700 | -4.85287200 | 0.75292000  |
| H | 7.48786200  | -1.43700200 | -1.92769000 | H  | 0.60349200  | -6.52069700 | 0.78965400  |
| C | 7.18855800  | -0.43983800 | 0.63316500  | H  | 0.67663500  | -5.50865800 | 2.24843000  |
| H | 8.14062100  | -0.96948000 | 0.51636200  | C  | 2.29972100  | -5.05153100 | -0.79545500 |
| H | 7.30326200  | 0.30053900  | 1.43207800  | H  | 1.52484300  | -4.45999000 | -1.29166200 |
| H | 6.44273700  | -1.17263900 | 0.96022800  | H  | 3.27909700  | -4.68542000 | -1.12519600 |
| C | 4.20106300  | 4.61246100  | -1.36110600 | H  | 2.18982900  | -6.08308100 | -1.14894100 |
| H | 5.19411000  | 5.05730500  | -1.24876500 | C  | -5.28806200 | 1.41970100  | 3.47884100  |
| C | 3.87266300  | 4.60620500  | -2.86787400 | H  | -5.22836200 | 2.13291700  | 4.30925200  |
| H | 2.90070300  | 4.13658900  | -3.05437100 | C  | -5.13001500 | -0.00008700 | 4.04949400  |
| H | 3.82746200  | 5.62970700  | -3.25814000 | H  | -5.38189600 | -0.76385800 | 3.30315700  |
| H | 4.63642800  | 4.06234900  | -3.43088000 | H  | -4.11037000 | -0.19751700 | 4.39302200  |
| C | 3.20110000  | 5.48430200  | -0.58504300 | H  | -5.81647000 | -0.13847900 | 4.89174100  |
| H | 2.16331200  | 5.17010500  | -0.74753600 | C  | -6.69016300 | 1.56809300  | 2.85237700  |
| H | 3.39578400  | 5.45986200  | 0.49346300  | H  | -6.79153600 | 0.91687800  | 1.97603400  |
| H | 3.27730100  | 6.52452900  | -0.91974500 | H  | -7.46308000 | 1.28129300  | 3.57504700  |
| C | -2.58737200 | -4.37215300 | -3.06998400 | H  | -6.88159300 | 2.59622000  | 2.54092300  |
| H | -3.26644400 | -5.20999500 | -2.88017900 | C  | -2.64332700 | 4.93994500  | 0.81077100  |
| C | -1.17795800 | -4.80175500 | -2.63572300 | H  | -3.20298400 | 5.61015900  | 1.46392500  |
| H | -0.42181600 | -4.05455700 | -2.89487900 | C  | -1.15478600 | 5.27495800  | 1.01991900  |
| H | -1.12315000 | -4.97861000 | -1.55481800 | H  | -0.49987900 | 4.64661500  | 0.40649100  |
| H | -0.89752000 | -5.73032900 | -3.14461800 | H  | -0.96074400 | 6.31949300  | 0.75064000  |
| C | -2.63500700 | -4.08600500 | -4.58381200 | H  | -0.86269600 | 5.12443800  | 2.06353900  |
| H | -2.15754700 | -4.89609600 | -5.14794700 | C  | -3.08952800 | 5.22492900  | -0.63686800 |
| H | -3.66658000 | -3.98821000 | -4.92913400 | H  | -2.56265700 | 4.58568100  | -1.35293600 |
| H | -2.10579000 | -3.15686800 | -4.81179600 | H  | -4.16329800 | 5.04626700  | -0.75801200 |
| C | -6.50665400 | -1.66322300 | -1.15166200 | H  | -2.88372300 | 6.26798100  | -0.90395500 |
| H | -7.07414500 | -2.40627700 | -1.71210300 | Rh | 0.21029300  | 0.58057600  | -1.17259700 |
| C | -6.84865000 | -1.86607100 | 0.33772200  | C  | 0.34456700  | -2.36084100 | -5.30935300 |

|    |             |             |             |   |             |             |             |
|----|-------------|-------------|-------------|---|-------------|-------------|-------------|
| C  | 0.45369000  | -1.38784100 | -4.32586200 | C | 4.75616700  | -0.56645700 | 2.71817000  |
| C  | 1.37074800  | -1.53371200 | -3.26428000 | C | 2.81373700  | -1.50810700 | 3.88353800  |
| C  | 2.15004100  | -2.70575900 | -3.21387600 | C | 4.16254700  | -1.06845700 | 3.89922800  |
| C  | 2.03606000  | -3.70059300 | -4.18125500 | C | -2.19068000 | -1.57957400 | -0.36220500 |
| C  | 1.12936500  | -3.51078400 | -5.21761100 | C | -2.04568200 | -2.10625900 | 0.92527000  |
| H  | -0.34874400 | -2.25784300 | -6.13648600 | C | -2.97397600 | -2.25798900 | -1.29985800 |
| H  | -0.18409800 | -0.51116900 | -4.36125000 | C | -2.64747400 | -3.31403600 | 1.28274900  |
| H  | 2.88039700  | -2.82038800 | -2.42034600 | C | -3.65869300 | -3.42975900 | -0.95508400 |
| H  | 2.63156400  | -4.60605300 | -4.14349700 | C | -3.46044200 | -3.98010000 | 0.33173600  |
| F  | 0.99163900  | -4.46488700 | -6.15137300 | C | -2.75040100 | 1.23171700  | -1.00289900 |
| C  | 1.69253500  | -0.46401600 | -2.30631400 | C | -4.09065700 | 0.86002500  | -1.13647400 |
| H  | 2.48397400  | -0.78771800 | -1.63307500 | C | -2.43084600 | 2.59312400  | -0.95161000 |
| C  | 1.92900000  | 0.93543700  | -2.83714900 | C | -5.11079800 | 1.81770200  | -1.19858600 |
| H  | 2.98446500  | 1.20916300  | -2.73906000 | C | -3.41350400 | 3.57883200  | -1.05724900 |
| H  | 1.56422500  | 1.07674900  | -3.85422900 | C | -4.77058000 | 3.18967500  | -1.18231200 |
| C  | -0.74408100 | 2.95143900  | -3.52648200 | H | 1.89667100  | -3.43221600 | 1.15097600  |
| C  | -0.75545100 | 3.18032100  | -4.91028000 | H | 1.14674000  | -5.64374300 | 0.36354600  |
| C  | -0.22442900 | 4.36037100  | -5.43483000 | H | -1.51946300 | 1.59482000  | -3.22626000 |
| C  | 0.32164000  | 5.32835400  | -4.58834400 | H | -0.37440500 | 1.44817700  | -5.40619800 |
| C  | 0.33744100  | 5.10558600  | -3.21062100 | H | 1.88208100  | 1.78843300  | -1.45637800 |
| C  | -0.18611500 | 3.92337400  | -2.68230700 | H | 3.73686300  | -2.05550200 | -1.42649000 |
| H  | -1.18421800 | 2.43697700  | -5.57632300 | H | 4.45745900  | -0.13812000 | 0.63512500  |
| H  | -0.23968200 | 4.52304000  | -6.50918700 | H | 1.03889900  | -1.71483500 | 2.68983500  |
| H  | 0.72822200  | 6.24812600  | -4.99846800 | H | -1.43851700 | -1.56284900 | 1.63995400  |
| H  | 0.75501900  | 5.85290700  | -2.54212500 | H | -3.06295000 | -1.86650000 | -2.30920400 |
| H  | -0.17076700 | 3.76339600  | -1.60919700 | H | -4.35901800 | -0.18936700 | -1.14797900 |
| Se | -1.57405900 | 1.31732900  | -2.82846100 | H | -1.39643300 | 2.88781700  | -0.80097800 |
| H  | 1.43504200  | 1.75900500  | -2.24295500 | N | -5.74661800 | 4.23294600  | -1.26851300 |

## 20-ts-R

B3LYP-D3 SCF energy: -4539.841822 a.u.

B3LYP-D3 enthalpy: -4537.930944 a.u.

B3LYP-D3 free energy: -4538.180692 a.u.

M06 SCF energy in solution: -4538.808597 a.u.

Imaginary frequency: -35.57 cm<sup>-1</sup>

## Cartesian coordinates

| ATOM | X           | Y           | Z           |   | X           | Y           | Z           |
|------|-------------|-------------|-------------|---|-------------|-------------|-------------|
| C    | -0.00392900 | -3.74851900 | -2.20755700 | N | -4.05206000 | -5.21733300 | 0.74423800  |
| C    | 0.42181000  | -2.47122000 | -1.78519700 | N | 4.86223400  | -1.14084600 | 5.14674900  |
| C    | 1.09585600  | -2.36495600 | -0.55085900 | N | 5.34404600  | 0.97645800  | -4.45535600 |
| C    | 1.35732300  | -3.50924200 | 0.21504300  | C | -3.71552700 | -6.43048900 | 0.01782800  |
| C    | 0.94052900  | -4.76044200 | -0.23324700 | H | -3.79278000 | -7.29027600 | 0.69648800  |
| C    | 0.25328500  | -4.88606700 | -1.43680700 | H | -4.35661800 | -6.64069700 | -0.85552900 |
| C    | 0.19942800  | -1.32317700 | -2.72215200 | H | -2.68016500 | -6.36527200 | -0.33050100 |
| C    | -0.65547200 | -0.23222400 | -2.45721300 | C | -5.40887500 | -5.15189800 | 1.26271600  |
| C    | 0.86886300  | -1.36585600 | -3.96968300 | H | -5.50759500 | -4.28278700 | 1.92129600  |
| C    | -0.85430500 | 0.76332000  | -3.42678900 | H | -6.18498300 | -5.07334200 | 0.47948200  |
| C    | 0.66910300  | -0.36693100 | -4.92702700 | H | -5.61896900 | -6.05273900 | 1.85253600  |
| C    | -0.20442500 | 0.68342800  | -4.65352600 | C | 5.11492400  | 0.11352100  | 5.83790900  |
| P    | 1.61875500  | -0.70077200 | 0.03283600  | H | 5.33142200  | -0.09426300 | 6.89273300  |
| P    | -1.39486300 | 0.01237800  | -0.78238700 | H | 5.95679400  | 0.70322600  | 5.43344700  |
| C    | 2.74825500  | -0.15480000 | -1.30069000 | H | 4.21575900  | 0.73724400  | 5.79552000  |
| C    | 2.66328600  | 1.13357000  | -1.82414400 | C | 5.88475900  | -2.16790600 | 5.27826800  |
| C    | 3.69059000  | -1.04746300 | -1.82214000 | H | 6.84722300  | -1.92587800 | 4.79371700  |
| C    | 3.50883800  | 1.56237800  | -2.85564300 | H | 6.08282200  | -2.34305000 | 6.34261500  |
| C    | 4.54451100  | -0.66857600 | -2.85764000 | H | 5.51525900  | -3.10264500 | 4.84496400  |
| C    | 4.45758100  | 0.65125400  | -3.37471700 | C | 4.76824000  | 0.94629900  | -5.78971300 |
| C    | 2.66975800  | -0.94482000 | 1.51203300  | H | 4.14039500  | 1.82253600  | -6.03460800 |
| C    | 3.99928600  | -0.51985900 | 1.54083000  | H | 5.57410900  | 0.89471500  | -6.53185200 |
| C    | 2.08450500  | -1.42054300 | 2.69434300  | H | 4.14776100  | 0.05112200  | -5.90017300 |
|      |             |             |             | C | 6.36887800  | 1.98926200  | -4.25057100 |
|      |             |             |             | H | 6.72927300  | 1.94023600  | -3.21919600 |

|   |             |             |             |    |             |             |             |
|---|-------------|-------------|-------------|----|-------------|-------------|-------------|
| H | 7.21742100  | 1.78198700  | -4.91539600 | H  | -3.21860500 | -3.99099000 | -3.65354400 |
| H | 6.03858700  | 3.02326600  | -4.44763300 | H  | -3.18476900 | -5.51227700 | -2.75518100 |
| C | -6.55517400 | 1.33061900  | -1.25425500 | H  | -4.53905200 | -5.16681400 | -3.84886600 |
| H | -7.21138600 | 2.19342100  | -1.13045500 | C  | -2.39697900 | -3.93855900 | 2.65270200  |
| C | -6.87496500 | 0.36462100  | -0.09663600 | H  | -3.32470200 | -4.42591700 | 2.96829500  |
| H | -6.29775300 | -0.56490700 | -0.16843600 | C  | -1.31969700 | -5.03610000 | 2.54862000  |
| H | -6.65076300 | 0.82594700  | 0.87155800  | H  | -0.36353800 | -4.60129100 | 2.23853200  |
| H | -7.93707900 | 0.09499100  | -0.11112100 | H  | -1.17547000 | -5.52472600 | 3.51954800  |
| C | -6.87437500 | 0.69228600  | -2.61887800 | H  | -1.59878500 | -5.79924000 | 1.81725100  |
| H | -7.92005200 | 0.36597400  | -2.65878800 | C  | -2.00986100 | -2.92089500 | 3.73170600  |
| H | -6.70589600 | 1.40130900  | -3.43642300 | H  | -1.03508100 | -2.46628400 | 3.52732700  |
| H | -6.24206000 | -0.18376200 | -2.79841100 | H  | -2.74084800 | -2.11554600 | 3.81440500  |
| C | -3.00324100 | 5.04215500  | -0.97770100 | H  | -1.93186000 | -3.41771300 | 4.70505000  |
| H | -3.89183300 | 5.63568700  | -1.20861900 | C  | 5.57150500  | -1.65461000 | -3.40406900 |
| C | -2.55283300 | 5.39101600  | 0.45442900  | H  | 5.65132000  | -1.47469200 | -4.48132900 |
| H | -1.71773500 | 4.75817300  | 0.77381600  | C  | 5.18502600  | -3.12739000 | -3.18814200 |
| H | -2.23292300 | 6.43774500  | 0.51355100  | H  | 5.29472900  | -3.42568000 | -2.13825600 |
| H | -3.36677200 | 5.23985800  | 1.17180100  | H  | 4.14904100  | -3.32402300 | -3.48093800 |
| C | -1.91680100 | 5.39281300  | -2.01027700 | H  | 5.84517900  | -3.77479600 | -3.77537100 |
| H | -1.00794500 | 4.79858600  | -1.86314400 | C  | 6.95957200  | -1.37796400 | -2.79196800 |
| H | -2.27082700 | 5.21307200  | -3.03160300 | H  | 6.93189600  | -1.51224900 | -1.70324600 |
| H | -1.63662300 | 6.44933900  | -1.92491300 | H  | 7.70484300  | -2.07182300 | -3.19802100 |
| C | 2.13090700  | -2.04323300 | 5.13486600  | H  | 7.29219600  | -0.35887300 | -3.00445600 |
| H | 2.88207100  | -2.03626700 | 5.92872000  | C  | 3.40576500  | 3.00260900  | -3.35150300 |
| C | 1.66350700  | -3.49716600 | 4.93625600  | H  | 3.91238100  | 3.06538300  | -4.31652400 |
| H | 0.91032100  | -3.58148400 | 4.14596700  | C  | 1.95634600  | 3.46417700  | -3.58634800 |
| H | 2.50509800  | -4.14621200 | 4.66838000  | H  | 1.37485400  | 3.50567700  | -2.65774100 |
| H | 1.21705700  | -3.88397000 | 5.85944800  | H  | 1.95014300  | 4.47028500  | -4.02099400 |
| C | 0.97099900  | -1.12793700 | 5.57596700  | H  | 1.43171200  | 2.78839800  | -4.26650900 |
| H | 0.48491700  | -1.53273000 | 6.47099400  | C  | 4.13301900  | 3.96097300  | -2.38533800 |
| H | 1.33515200  | -0.12241500 | 5.81699500  | H  | 3.65560100  | 3.96230600  | -1.39956300 |
| H | 0.20430500  | -1.02670000 | 4.79971600  | H  | 5.17899300  | 3.67310500  | -2.24435000 |
| C | 6.18901000  | -0.04679600 | 2.66307900  | H  | 4.11092800  | 4.98726700  | -2.77051900 |
| H | 6.64990500  | -0.19359200 | 3.64044000  | Rh | 0.06100900  | 0.78837700  | 0.74446200  |
| C | 7.03687800  | -0.82554200 | 1.63921400  | Se | -1.08453000 | 2.04184300  | 2.57499000  |
| H | 6.66235200  | -0.68921000 | 0.61777700  | C  | -2.49167200 | 0.91386500  | 3.32954100  |
| H | 8.07533500  | -0.47643500 | 1.66050300  | C  | -3.52773600 | 0.42703100  | 2.51958000  |
| H | 7.03184900  | -1.89885800 | 1.85817200  | C  | -2.54431000 | 0.71629500  | 4.71801700  |
| C | 6.21275900  | 1.46593300  | 2.36877000  | C  | -4.61484300 | -0.23005500 | 3.09726500  |
| H | 5.77634100  | 1.68805900  | 1.38746000  | H  | -3.50035600 | 0.58199500  | 1.44882500  |
| H | 5.64612800  | 2.02361200  | 3.12352700  | C  | -3.62975600 | 0.05007100  | 5.28802900  |
| H | 7.24189200  | 1.84245800  | 2.37012400  | H  | -1.74627200 | 1.09507900  | 5.35011900  |
| H | -0.07704300 | -5.86155100 | -1.77518100 | C  | -4.67137100 | -0.41788100 | 4.48084600  |
| H | 1.18212400  | -0.40256500 | -5.88016600 | H  | -5.41395700 | -0.59865500 | 2.46021800  |
| O | 1.70168400  | -2.42632500 | -4.16264300 | H  | -3.66463800 | -0.09919100 | 6.36365000  |
| O | -0.67463000 | -3.79544900 | -3.39263900 | H  | -5.51859100 | -0.92975000 | 4.92838600  |
| C | 2.26487100  | -2.62498000 | -5.45209600 | C  | 0.56890800  | 6.03506400  | 2.18184000  |
| H | 2.97774700  | -1.83053900 | -5.70539500 | C  | 0.92328300  | 4.78424200  | 2.66470800  |
| H | 2.79750100  | -3.57558500 | -5.40196300 | C  | 1.39892400  | 3.77074900  | 1.78817400  |
| H | 1.48738500  | -2.68110200 | -6.22446000 | C  | 1.48288300  | 4.07713100  | 0.40189700  |
| C | -0.54483300 | -4.97295200 | -4.18319600 | C  | 1.14409700  | 5.32428000  | -0.08714900 |
| H | -1.12347900 | -5.80921900 | -3.77450900 | C  | 0.67582100  | 6.28363800  | 0.81387900  |
| H | -0.94552000 | -4.71815000 | -5.16612100 | H  | 0.18838400  | 6.81269900  | 2.83456300  |
| H | 0.50875100  | -5.26333600 | -4.27428300 | H  | 0.82115200  | 4.57571200  | 3.72285100  |
| C | -4.60838200 | -4.05515400 | -1.97273500 | H  | 1.84064900  | 3.31275200  | -0.27424900 |
| H | -5.18672400 | -4.82858700 | -1.46417800 | H  | 1.21908500  | 5.56787800  | -1.14031400 |
| C | -5.62278400 | -3.02908200 | -2.51027100 | F  | 0.29037900  | 7.47486600  | 0.34043700  |
| H | -5.13363100 | -2.25168200 | -3.10810900 | C  | 1.76412000  | 2.46556500  | 2.23215100  |
| H | -6.35830900 | -3.52293000 | -3.15528600 | H  | 2.18633500  | 1.81467100  | 1.46466300  |
| H | -6.16218800 | -2.53768700 | -1.69308700 | C  | 2.15864300  | 2.11221700  | 3.63001400  |
| C | -3.84271600 | -4.72124600 | -3.12894300 | H  | 1.57520900  | 2.63409600  | 4.39054000  |

|   |            |            |            |
|---|------------|------------|------------|
| H | 3.21961100 | 2.37860400 | 3.76686500 |
| H | 2.07474100 | 1.03834900 | 3.79306500 |

## 21

B3LYP-D3 SCF energy: -4539.857869 a.u.

B3LYP-D3 enthalpy: -4537.948211 a.u.

B3LYP-D3 free energy: -4538.199113 a.u.

M06 SCF energy in solution: -4538.825417 a.u.

### Cartesian coordinates

| ATOM | X           | Y           | Z           |
|------|-------------|-------------|-------------|
| C    | 0.32186200  | -2.60813000 | 3.14820300  |
| C    | -0.24897000 | -1.56224800 | 2.38679300  |
| C    | -1.00849000 | -1.89240600 | 1.24841600  |
| C    | -1.24292800 | -3.23911500 | 0.92250200  |
| C    | -0.71970900 | -4.24916600 | 1.72145700  |
| C    | 0.07708900  | -3.94538300 | 2.82271100  |
| C    | -0.07225200 | -0.16917500 | 2.89874200  |
| C    | 0.75500900  | 0.79325500  | 2.29150100  |
| C    | -0.73206000 | 0.16119500  | 4.10707300  |
| C    | 0.92442500  | 2.05042100  | 2.89404500  |
| C    | -0.58740900 | 1.42829500  | 4.67817900  |
| C    | 0.25275900  | 2.35874300  | 4.07217800  |
| P    | -1.69798200 | -0.57444000 | 0.15952600  |
| P    | 1.53842900  | 0.41717900  | 0.65745900  |
| C    | -2.75534800 | 0.40888600  | 1.26354200  |
| C    | -2.78226100 | 1.79865500  | 1.22487200  |
| C    | -3.55930500 | -0.27248300 | 2.18772200  |
| C    | -3.56158900 | 2.53472900  | 2.12547400  |
| C    | -4.39349200 | 0.41980300  | 3.06358600  |
| C    | -4.38057200 | 1.84039600  | 3.04350900  |
| C    | -2.78886400 | -1.46112000 | -1.00814200 |
| C    | -4.17622400 | -1.40783600 | -0.90287900 |
| C    | -2.20835600 | -2.14484200 | -2.08789200 |
| C    | -5.00071900 | -2.01988500 | -1.85530000 |
| C    | -2.99579100 | -2.73012500 | -3.07870000 |
| C    | -4.40847000 | -2.65054300 | -2.97051200 |
| C    | 2.49014100  | -1.12404200 | 0.91281700  |
| C    | 2.21119800  | -2.24922400 | 0.12816000  |
| C    | 3.51076200  | -1.19316100 | 1.86309800  |
| C    | 2.95124700  | -3.42876100 | 0.24616800  |
| C    | 4.34091500  | -2.31796900 | 1.94970300  |
| C    | 4.06609700  | -3.43775400 | 1.12917700  |
| C    | 2.73949700  | 1.78541800  | 0.38992200  |
| C    | 4.11527600  | 1.59120200  | 0.26009800  |
| C    | 2.21869600  | 3.06787400  | 0.14518100  |
| C    | 4.96709100  | 2.62890600  | -0.15489600 |
| C    | 3.03093200  | 4.12905500  | -0.25091900 |
| C    | 4.41819200  | 3.89669600  | -0.44212400 |
| H    | -1.84728500 | -3.49921300 | 0.06346300  |
| H    | -0.92453200 | -5.28731900 | 1.47800800  |
| H    | 1.58690400  | 2.78652400  | 2.46008100  |
| H    | 0.38928200  | 3.33474700  | 4.52925800  |
| H    | -2.17316300 | 2.31866200  | 0.49736100  |
| H    | -3.52324000 | -1.35447200 | 2.22074200  |
| H    | -4.63306900 | -0.87199400 | -0.07951900 |
| H    | -1.12582000 | -2.18805000 | -2.17720700 |
| H    | 1.38910700  | -2.19769900 | -0.57462200 |
| H    | 3.69617400  | -0.34171800 | 2.51105000  |
| H    | 4.54020600  | 0.61540200  | 0.46137100  |
| H    | 1.14859800  | 3.22669600  | 0.21769900  |

|   |             |             |             |
|---|-------------|-------------|-------------|
| N | 5.19282400  | 4.99252800  | -0.94311700 |
| C | 6.02954300  | 5.71289400  | 0.00408400  |
| H | 5.49816000  | 5.82085400  | 0.95485900  |
| H | 7.00030200  | 5.22696400  | 0.20637600  |
| H | 6.23577000  | 6.71747400  | -0.38590000 |
| C | 5.73434400  | 4.88973900  | -2.29027100 |
| H | 5.04246700  | 4.32517100  | -2.92172900 |
| H | 5.83990200  | 5.89619300  | -2.71533100 |
| H | 6.72277600  | 4.40095800  | -2.35044500 |
| N | 4.90206000  | -4.59654700 | 1.11010300  |
| N | -5.17206800 | -3.21091000 | -4.04441400 |
| N | -5.20982200 | 2.50475200  | 4.00622400  |
| C | 5.11038100  | -5.37293000 | 2.32110100  |
| H | 5.27191200  | -6.42532100 | 2.05103100  |
| H | 5.96960500  | -5.05852300 | 2.93638900  |
| H | 4.21158400  | -5.32150400 | 2.94281300  |
| C | 6.02296100  | -4.55897300 | 0.18346000  |
| H | 5.69792300  | -4.16491300 | -0.78464800 |
| H | 6.86921400  | -3.94276300 | 0.54007000  |
| H | 6.39510300  | -5.57770700 | 0.02156800  |
| C | -5.96373500 | -2.30024800 | -4.85962100 |
| H | -6.11727100 | -2.74805400 | -5.84956100 |
| H | -6.95755900 | -2.05584500 | -4.44694900 |
| H | -5.41415800 | -1.36368000 | -4.99173500 |
| C | -5.75193900 | -4.52578800 | -3.81805000 |
| H | -6.65134400 | -4.52111100 | -3.17633200 |
| H | -6.03156500 | -4.96808800 | -4.78187600 |
| H | -5.00693000 | -5.17714500 | -3.34906900 |
| C | -4.53978200 | 2.96286500  | 5.21237800  |
| H | -3.93798800 | 3.87979400  | 5.07370800  |
| H | -5.28663200 | 3.16575000  | 5.98942500  |
| H | -3.87036400 | 2.17809400  | 5.58044400  |
| C | -6.28758700 | 3.36479300  | 3.53619400  |
| H | -6.70142100 | 2.95625700  | 2.61019900  |
| H | -7.08744900 | 3.37991100  | 4.28783000  |
| H | -5.99271800 | 4.40982500  | 3.34443300  |
| C | 6.46542800  | 2.35838700  | -0.23953400 |
| H | 6.92893500  | 3.17496800  | -0.79388700 |
| C | 6.79545500  | 1.05887800  | -0.99700800 |
| H | 6.45085300  | 0.17053100  | -0.45435500 |
| H | 6.33349500  | 1.04799600  | -1.99075400 |
| H | 7.87899600  | 0.96037300  | -1.12357200 |
| C | 7.08743700  | 2.35619900  | 1.17076700  |
| H | 8.16812200  | 2.18134100  | 1.11529300  |
| H | 6.92112800  | 3.31232300  | 1.67737400  |
| H | 6.64781600  | 1.56959300  | 1.79016400  |
| C | 2.42772500  | 5.49789800  | -0.54490600 |
| H | 3.18320300  | 6.24346300  | -0.27781300 |
| C | 2.14679500  | 5.65008300  | -2.05328700 |
| H | 1.40875400  | 4.91410300  | -2.38794700 |
| H | 1.73842100  | 6.64431600  | -2.26824400 |
| H | 3.05881300  | 5.52390700  | -2.64142800 |
| C | 1.15426100  | 5.79165600  | 0.26375400  |
| H | 0.30820300  | 5.18586800  | -0.07914000 |
| H | 1.29547000  | 5.60602200  | 1.33482300  |
| H | 0.86754900  | 6.84113200  | 0.13575300  |
| C | -2.34297400 | -3.34994400 | -4.30709300 |
| H | -3.06701600 | -4.04207100 | -4.74447400 |
| C | -1.05665700 | -4.12795700 | -3.99402300 |
| H | -0.24037700 | -3.46573300 | -3.68550000 |
| H | -1.20883900 | -4.86194200 | -3.19508000 |

|   |             |             |             |                                               |             |             |             |
|---|-------------|-------------|-------------|-----------------------------------------------|-------------|-------------|-------------|
| H | -0.71660800 | -4.66317000 | -4.88788900 | H                                             | -2.04506000 | 5.67695900  | 2.10321800  |
| C | -2.07148100 | -2.24664700 | -5.35015600 | H                                             | -1.48964100 | 4.19594600  | 2.91713400  |
| H | -1.60590500 | -2.66839300 | -6.24919100 | C                                             | -4.27346600 | 4.58317800  | 0.83438900  |
| H | -2.99980600 | -1.74866200 | -5.64673600 | H                                             | -3.84174100 | 4.20325500  | -0.09827700 |
| H | -1.40564900 | -1.47874800 | -4.93569800 | H                                             | -5.32234800 | 4.27142300  | 0.86351900  |
| C | -6.50858200 | -1.95155700 | -1.63984700 | H                                             | -4.24323000 | 5.67844600  | 0.79940700  |
| H | -6.99705200 | -2.52344100 | -2.42992300 | Rh                                            | -0.09060600 | 0.51008000  | -1.10617500 |
| C | -6.90986300 | -2.60275100 | -0.30210400 | C                                             | 4.35550300  | -1.58994700 | -2.47333300 |
| H | -6.48220300 | -2.06480000 | 0.55229200  | C                                             | 3.49360000  | -0.50384400 | -2.50507600 |
| H | -7.99957500 | -2.59474200 | -0.18654000 | C                                             | 2.33558900  | -0.51528100 | -3.30926700 |
| H | -6.56721900 | -3.64217100 | -0.24887800 | C                                             | 2.09435100  | -1.64127900 | -4.12032900 |
| C | -7.02082800 | -0.50141200 | -1.72917200 | C                                             | 2.96280600  | -2.73108300 | -4.11544300 |
| H | -6.58718100 | 0.12239200  | -0.93858200 | C                                             | 4.06715700  | -2.69470300 | -3.27055200 |
| H | -6.75955100 | -0.04825800 | -2.69122300 | H                                             | 5.23006700  | -1.60102900 | -1.83257900 |
| H | -8.11093300 | -0.47280800 | -1.61905200 | H                                             | 3.71286600  | 0.35360500  | -1.88157400 |
| H | 0.49651400  | -4.74772400 | 3.41687100  | H                                             | 1.21331700  | -1.66486300 | -4.75613100 |
| H | -1.10904500 | 1.68870900  | 5.59078300  | H                                             | 2.77886300  | -3.61138600 | -4.72121700 |
| O | -1.49158700 | -0.82423700 | 4.65667400  | F                                             | 4.87158100  | -3.77398100 | -3.19435500 |
| O | 1.09969100  | -2.21568800 | 4.18965500  | C                                             | 1.39017400  | 0.60526000  | -3.34472200 |
| C | -2.00733900 | -0.63006500 | 5.96805600  | H                                             | 0.53338600  | 0.47332600  | -4.00235300 |
| H | -2.78468900 | 0.14412600  | 5.98091400  | C                                             | 1.50893200  | 1.79194300  | -2.68687600 |
| H | -2.45092600 | -1.58290300 | 6.25893900  | H                                             | 2.39012700  | 2.03937400  | -2.11196100 |
| H | -1.21053700 | -0.36627700 | 6.67446900  | H                                             | 0.81321500  | 2.59755500  | -2.88390700 |
| C | 1.60000200  | -3.20865300 | 5.07500500  | C                                             | -1.59989900 | 2.99090700  | -3.16476200 |
| H | 2.26741500  | -3.90784700 | 4.55604200  | C                                             | -1.30410000 | 3.33882500  | -4.49038600 |
| H | 2.16909800  | -2.67048300 | 5.83383900  | C                                             | -1.06947800 | 4.67326400  | -4.83542500 |
| H | 0.78312400  | -3.76579900 | 5.55143200  | C                                             | -1.12532600 | 5.67373500  | -3.86349900 |
| C | 5.53063700  | -2.27702000 | 2.90531300  | C                                             | -1.41618600 | 5.33282900  | -2.53974200 |
| H | 6.19324400  | -3.10636200 | 2.65478100  | C                                             | -1.64991500 | 4.00208300  | -2.19306900 |
| C | 6.36468400  | -0.99488800 | 2.74772200  | H                                             | -1.26231600 | 2.56608100  | -5.25267200 |
| H | 5.80969900  | -0.10470900 | 3.06363200  | H                                             | -0.84281800 | 4.92844500  | -5.86716500 |
| H | 7.26756900  | -1.05155100 | 3.36580500  | H                                             | -0.94268600 | 6.70974400  | -4.13375700 |
| H | 6.67532800  | -0.85121300 | 1.70751600  | H                                             | -1.46034700 | 6.10246400  | -1.77385300 |
| C | 5.07586600  | -2.45063600 | 4.36632300  | H                                             | -1.88236700 | 3.74733100  | -1.16554300 |
| H | 4.36106900  | -1.66642900 | 4.64373400  | Se                                            | -2.03119200 | 1.13079200  | -2.71240000 |
| H | 4.58865600  | -3.41852600 | 4.51784700  | H                                             | -0.50658600 | 1.80534500  | -0.43875200 |
| H | 5.93045000  | -2.39028100 | 5.04982800  |                                               |             |             |             |
| C | 2.59044900  | -4.67152300 | -0.57648200 |                                               |             |             |             |
| H | 3.46971900  | -4.92679200 | -1.18227100 | <b>22-ts-S</b>                                |             |             |             |
| C | 2.26332100  | -5.89331300 | 0.30979000  | B3LYP-D3 SCF energy: -4539.837648 a.u.        |             |             |             |
| H | 1.43206100  | -5.66246400 | 0.98194300  | B3LYP-D3 enthalpy: -4537.929507 a.u.          |             |             |             |
| H | 1.96321000  | -6.73838300 | -0.32062100 | B3LYP-D3 free energy: -4538.178897 a.u.       |             |             |             |
| H | 3.11887500  | -6.20387000 | 0.90605700  | M06 SCF energy in solution: -4538.806800 a.u. |             |             |             |
| C | 1.41300300  | -4.45000100 | -1.53624400 | Imaginary frequency: -869.71 cm <sup>-1</sup> |             |             |             |
| H | 0.48038800  | -4.27954500 | -0.98697000 |                                               |             |             |             |
| H | 1.57257200  | -3.60481900 | -2.20613800 | Cartesian coordinates                         |             |             |             |
| H | 1.27085000  | -5.33896200 | -2.15959100 | ATOM X Y Z                                    |             |             |             |
| C | -5.32577300 | -0.34149400 | 4.00274900  | C 0.23586000 -2.64266500 3.09370200           |             |             |             |
| H | -5.29353300 | 0.16087600  | 4.97642000  | C -0.27359000 -1.57104100 2.32531300          |             |             |             |
| C | -4.93486500 | -1.81459200 | 4.20587400  | C -1.08732000 -1.86592400 1.21543600          |             |             |             |
| H | -5.13926500 | -2.41078700 | 3.30769500  | C -1.42998500 -3.19534800 0.92235500          |             |             |             |
| H | -3.87486200 | -1.93287900 | 4.44772000  | C -0.96169900 -4.22806700 1.72736800          |             |             |             |
| H | -5.52849500 | -2.24627500 | 5.01872800  | C -0.11610900 -3.96373700 2.80219400          |             |             |             |
| C | -6.78115900 | -0.26318500 | 3.49598100  | C -0.00607400 -0.18455700 2.82183000          |             |             |             |
| H | -6.86583800 | -0.72028900 | 2.50236600  | C 0.84977300 0.74420600 2.19710900            |             |             |             |
| H | -7.45098900 | -0.80534900 | 4.17352400  | C -0.62552900 0.17706200 4.04428900           |             |             |             |
| H | -7.12708000 | 0.76995200  | 3.43028600  | C 1.08887400 1.98892300 2.80383000            |             |             |             |
| C | -3.49779000 | 4.05757800  | 2.05863500  | C -0.40870700 1.43221900 4.61798300           |             |             |             |
| H | -3.97495800 | 4.45925000  | 2.95414500  | C 0.46240800 2.32327500 3.99860400            |             |             |             |
| C | -2.04997000 | 4.58197500  | 2.06024600  | P -1.70048600 -0.51658200 0.12063400          |             |             |             |
| H | -1.50612500 | 4.29044000  | 1.15529600  | P 1.60085200 0.35724300 0.54447500            |             |             |             |
|   |             |             |             | C -2.66244200 0.54042100 1.24853200           |             |             |             |

|   |             |             |             |   |             |             |             |
|---|-------------|-------------|-------------|---|-------------|-------------|-------------|
| C | -2.57812200 | 1.92797500  | 1.19503200  | H | -6.44159900 | -4.94765700 | -4.36540100 |
| C | -3.49756300 | -0.06784200 | 2.19424200  | H | -5.37198800 | -5.07522800 | -2.95714900 |
| C | -3.29361500 | 2.73042600  | 2.09315700  | C | -4.23666200 | 3.26903800  | 5.17338600  |
| C | -4.27658000 | 0.69514800  | 3.06163700  | H | -3.56388100 | 4.13310100  | 5.02083200  |
| C | -4.16042600 | 2.11016000  | 3.02055500  | H | -4.96538700 | 3.54311600  | 5.94584000  |
| C | -2.88749100 | -1.33950900 | -1.00387200 | H | -3.63170000 | 2.43941400  | 5.55298000  |
| C | -4.26035900 | -1.33959200 | -0.76359200 | C | -5.95377800 | 3.77392000  | 3.49215000  |
| C | -2.39873500 | -1.95922300 | -2.16050800 | H | -6.39360700 | 3.38497300  | 2.56972600  |
| C | -5.15611400 | -1.94773100 | -1.64994900 | H | -6.75181900 | 3.85432500  | 4.24167900  |
| C | -3.26063300 | -2.56187800 | -3.07886200 | H | -5.58612900 | 4.79349200  | 3.28850600  |
| C | -4.65511200 | -2.55714100 | -2.82230900 | C | 6.70214600  | 1.92771100  | -0.21612300 |
| C | 2.41772100  | -1.26518800 | 0.77593700  | H | 7.23180900  | 2.71548800  | -0.75307600 |
| C | 2.04354100  | -2.36415400 | -0.00744100 | C | 6.94704900  | 0.61924300  | -0.98947500 |
| C | 3.42423700  | -1.42112000 | 1.73066000  | H | 6.53010000  | -0.24913000 | -0.46608000 |
| C | 2.68270400  | -3.60209300 | 0.11362700  | H | 6.50166600  | 0.65943800  | -1.99022900 |
| C | 4.16127000  | -2.60843100 | 1.81490800  | H | 8.02218800  | 0.44296600  | -1.10226600 |
| C | 3.79982100  | -3.69869400 | 0.98949100  | C | 7.30349500  | 1.85925900  | 1.20157000  |
| C | 2.92731200  | 1.62800900  | 0.33378200  | H | 8.36900900  | 1.60592700  | 1.15667800  |
| C | 4.28772400  | 1.33178500  | 0.22414800  | H | 7.20142200  | 2.81756600  | 1.72070300  |
| C | 2.52155600  | 2.95601300  | 0.11910600  | H | 6.79870000  | 1.09856100  | 1.80320800  |
| C | 5.22744900  | 2.30981900  | -0.14604500 | C | 2.92394800  | 5.37436700  | -0.50915700 |
| C | 3.42055900  | 3.95978000  | -0.23625000 | H | 3.75497600  | 6.05122700  | -0.29053100 |
| C | 4.78772500  | 3.62444900  | -0.41038300 | C | 2.57969200  | 5.53840300  | -2.00326300 |
| H | -2.07387300 | -3.42156000 | 0.08161400  | H | 1.75866900  | 4.87129800  | -2.28910400 |
| H | -1.24806300 | -5.25270900 | 1.50981200  | H | 2.25732400  | 6.56459100  | -2.21432900 |
| H | 1.77736000  | 2.69575500  | 2.36343600  | H | 3.44400700  | 5.31838400  | -2.63588700 |
| H | 0.65824800  | 3.28859700  | 4.45669400  | C | 1.72618800  | 5.78137600  | 0.36406900  |
| H | -1.93443800 | 2.38646700  | 0.45471100  | H | 0.81322100  | 5.24316900  | 0.08503200  |
| H | -3.53357200 | -1.14899200 | 2.24806100  | H | 1.91506300  | 5.59712800  | 1.42783300  |
| H | -4.65203800 | -0.84340100 | 0.11562900  | H | 1.51904000  | 6.84947600  | 0.23608700  |
| H | -1.33120100 | -1.94296800 | -2.36667600 | C | -2.69299700 | -3.13952300 | -4.36763100 |
| H | 1.23026600  | -2.24119500 | -0.71122600 | H | -3.50513500 | -3.68696800 | -4.85281000 |
| H | 3.67121500  | -0.59227700 | 2.38694400  | C | -1.53026300 | -4.11431400 | -4.12120700 |
| H | 4.63042800  | 0.31938500  | 0.40000400  | H | -0.65540700 | -3.60825400 | -3.69860400 |
| H | 1.46829300  | 3.20612500  | 0.19355900  | H | -1.81572200 | -4.91297400 | -3.42766400 |
| N | 5.65329500  | 4.66655300  | -0.87595600 | H | -1.21819700 | -4.57780800 | -5.06439000 |
| C | 6.55397000  | 5.28144000  | 0.08724200  | C | -2.26397400 | -1.99726800 | -5.30990600 |
| H | 6.04206600  | 5.39190300  | 1.04823800  | H | -1.86170000 | -2.39740800 | -6.24835000 |
| H | 7.48660500  | 4.71568600  | 0.25761800  | H | -3.10859300 | -1.34284800 | -5.54995100 |
| H | 6.83292300  | 6.28203500  | -0.26615600 | H | -1.49548900 | -1.36886800 | -4.84116800 |
| C | 6.17458100  | 4.56367700  | -2.23082800 | C | -6.63967500 | -1.90404500 | -1.29805900 |
| H | 5.42240200  | 4.10621900  | -2.87991800 | H | -7.20066200 | -2.39088400 | -2.09655900 |
| H | 6.38814200  | 5.56980800  | -2.61358900 | C | -6.92264900 | -2.68457400 | 0.00030100  |
| H | 7.10295600  | 3.97199700  | -2.32025500 | H | -6.40669500 | -2.23380600 | 0.85704400  |
| N | 4.55328100  | -4.91305200 | 0.95503000  | H | -7.99607700 | -2.68483300 | 0.22127200  |
| N | -5.50282600 | -3.16846000 | -3.80257900 | H | -6.58939500 | -3.72514900 | -0.08173700 |
| N | -4.93994800 | 2.84563400  | 3.97377300  | C | -7.15390300 | -0.45508200 | -1.19750000 |
| C | 4.70574100  | -5.72072000 | 2.15371000  | H | -6.66993000 | 0.08824400  | -0.37723700 |
| H | 4.80180500  | -6.77680100 | 1.86691400  | H | -6.96137000 | 0.09775300  | -2.12322200 |
| H | 5.58049200  | -5.47197900 | 2.77712600  | H | -8.23367000 | -0.44755300 | -1.00971900 |
| H | 3.80894000  | -5.62276500 | 2.77243300  | H | 0.25720300  | -4.78305300 | 3.40416900  |
| C | 5.67771800  | -4.93402500 | 0.03257200  | H | -0.89816000 | 1.71287700  | 5.54217700  |
| H | 5.38702800  | -4.48439700 | -0.92204200 | O | -1.42327500 | -0.76964000 | 4.60885200  |
| H | 6.56777000  | -4.39592100 | 0.40905100  | O | 1.06180600  | -2.29241900 | 4.11510100  |
| H | 5.97154000  | -5.97295600 | -0.16037600 | C | -1.91286400 | -0.54519400 | 5.92511900  |
| C | -6.30515800 | -2.27807700 | -4.62873700 | H | -2.64820900 | 0.26921500  | 5.94493800  |
| H | -6.61037000 | -2.80962500 | -5.53844000 | H | -2.40248200 | -1.47284600 | 6.22377100  |
| H | -7.21922500 | -1.89663000 | -4.14050400 | H | -1.09542400 | -0.32257200 | 6.62227400  |
| H | -5.69858400 | -1.41695400 | -4.92580500 | C | 1.39140900  | -3.27745500 | 5.08513300  |
| C | -6.11537600 | -4.43993000 | -3.44948300 | H | 1.99105300  | -4.08702900 | 4.65123900  |
| H | -6.99095500 | -4.36100200 | -2.78100800 | H | 1.98589700  | -2.76351000 | 5.84158400  |

|    |             |             |             |
|----|-------------|-------------|-------------|
| H  | 0.48782600  | -3.69743900 | 5.54532700  |
| C  | 5.33935300  | -2.67101700 | 2.78334400  |
| H  | 5.94436200  | -3.54053900 | 2.52363600  |
| C  | 6.26576100  | -1.44983000 | 2.66635000  |
| H  | 5.77162300  | -0.52837600 | 2.99346200  |
| H  | 7.15192000  | -1.58465600 | 3.29640500  |
| H  | 6.60343100  | -1.30778400 | 1.63444100  |
| C  | 4.84998900  | -2.84145300 | 4.23356300  |
| H  | 4.18503900  | -2.01619100 | 4.51499300  |
| H  | 4.29482600  | -3.77613200 | 4.35598200  |
| H  | 5.69506400  | -2.85424700 | 4.93140300  |
| C  | 2.21469200  | -4.81709200 | -0.70000400 |
| H  | 3.05300400  | -5.11812000 | -1.34353100 |
| C  | 1.85030800  | -6.02780300 | 0.18823300  |
| H  | 1.08949800  | -5.74429600 | 0.92085400  |
| H  | 1.43739600  | -6.83078400 | -0.43331800 |
| H  | 2.71517300  | -6.42158200 | 0.71674900  |
| C  | 1.00902500  | -4.52364500 | -1.60463500 |
| H  | 0.11662600  | -4.29831400 | -1.01158200 |
| H  | 1.18477200  | -3.68797200 | -2.28051200 |
| H  | 0.78545600  | -5.40161900 | -2.21977000 |
| C  | -5.27041800 | 0.01619500  | 4.00029800  |
| H  | -5.22132200 | 0.53294300  | 4.96552600  |
| C  | -4.98437200 | -1.47636400 | 4.23421700  |
| H  | -5.21931600 | -2.07405700 | 3.34435300  |
| H  | -3.93767600 | -1.66330100 | 4.48992800  |
| H  | -5.61466900 | -1.85163900 | 5.04747400  |
| C  | -6.70778100 | 0.18262800  | 3.46333000  |
| H  | -6.80367000 | -0.28558400 | 2.47548000  |
| H  | -7.42618500 | -0.30048000 | 4.13592100  |
| H  | -6.98133100 | 1.23558000  | 3.37272900  |
| C  | -3.12361700 | 4.24408000  | 2.00562100  |
| H  | -3.58690900 | 4.69275500  | 2.88584400  |
| C  | -1.64407600 | 4.66882500  | 2.02990800  |
| H  | -1.09161000 | 4.28802600  | 1.16442900  |
| H  | -1.56362700 | 5.76175200  | 2.01552000  |
| H  | -1.14078900 | 4.29354500  | 2.92569700  |
| C  | -3.84343300 | 4.79977000  | 0.76061300  |
| H  | -3.42962400 | 4.37336400  | -0.15943600 |
| H  | -4.91200800 | 4.56276800  | 0.78343700  |
| H  | -3.73615300 | 5.88950400  | 0.70622900  |
| Rh | -0.02691300 | 0.64868000  | -1.21997900 |
| C  | 4.21050300  | -1.60769300 | -2.54432300 |
| C  | 3.33531800  | -0.53312900 | -2.51430500 |
| C  | 2.10117800  | -0.58004500 | -3.19690700 |
| C  | 1.80665100  | -1.72079200 | -3.97318200 |
| C  | 2.68647000  | -2.79679600 | -4.03081200 |
| C  | 3.86053800  | -2.73363100 | -3.28634400 |
| H  | 5.14492400  | -1.59386900 | -1.99529800 |
| H  | 3.60675900  | 0.34306900  | -1.94066000 |
| H  | 0.87254400  | -1.76607100 | -4.52585000 |
| H  | 2.46319300  | -3.68789300 | -4.60669400 |
| F  | 4.67988400  | -3.80097400 | -3.26840600 |
| C  | 1.14187200  | 0.51743600  | -3.18528200 |
| H  | 0.32643500  | 0.41342100  | -3.89620900 |
| C  | 1.33694600  | 1.80792800  | -2.63968300 |
| H  | 2.29197400  | 2.06908600  | -2.19938700 |
| H  | 0.81304600  | 2.62723400  | -3.12331100 |
| C  | -1.59988800 | 3.22311100  | -3.07987500 |
| C  | -1.59299600 | 3.61439600  | -4.42644900 |
| C  | -1.30042200 | 4.93569800  | -4.77647100 |

|    |             |            |             |
|----|-------------|------------|-------------|
| C  | -1.00870800 | 5.88042500 | -3.79010600 |
| C  | -1.01399000 | 5.49699000 | -2.44660700 |
| C  | -1.30711200 | 4.17905800 | -2.09408800 |
| H  | -1.81710700 | 2.88515400 | -5.19967600 |
| H  | -1.29774000 | 5.22437000 | -5.82413300 |
| H  | -0.78117900 | 6.90617300 | -4.06526500 |
| H  | -0.79049400 | 6.22249100 | -1.66923200 |
| H  | -1.31121800 | 3.89084800 | -1.04935700 |
| Se | -2.07502300 | 1.37986800 | -2.60590400 |
| H  | 0.41466200  | 2.15085900 | -1.30297900 |

### 23-S

B3LYP-D3 SCF energy: -4539.862316 a.u.

B3LYP-D3 enthalpy: -4537.949860 a.u.

B3LYP-D3 free energy: -4538.199155 a.u.

M06 SCF energy in solution: -4538.830812 a.u.

### Cartesian coordinates

| ATOM | X           | Y           | Z           |
|------|-------------|-------------|-------------|
| C    | 0.20803300  | -2.69832500 | 2.98640400  |
| C    | -0.26303700 | -1.60331700 | 2.22512000  |
| C    | -1.02593400 | -1.87052300 | 1.07027800  |
| C    | -1.37588700 | -3.18853700 | 0.74011800  |
| C    | -0.96289800 | -4.24128200 | 1.54925200  |
| C    | -0.15629500 | -4.00792200 | 2.66001100  |
| C    | -0.00252000 | -0.23287700 | 2.76950000  |
| C    | 0.85762500  | 0.71337400  | 2.17831700  |
| C    | -0.63240600 | 0.09929900  | 3.99443000  |
| C    | 1.08150500  | 1.95148400  | 2.80248900  |
| C    | -0.42393200 | 1.34438600  | 4.59445900  |
| C    | 0.44291600  | 2.25685600  | 3.99885500  |
| P    | -1.63780000 | -0.50181700 | 0.00155600  |
| P    | 1.60258900  | 0.35471500  | 0.52510700  |
| C    | -2.64680600 | 0.46059900  | 1.18872100  |
| C    | -2.63830200 | 1.85162700  | 1.23894800  |
| C    | -3.45529500 | -0.25237900 | 2.08521600  |
| C    | -3.40981000 | 2.55024900  | 2.17715700  |
| C    | -4.28622300 | 0.40471000  | 2.99024800  |
| C    | -4.25753300 | 1.82317600  | 3.04146100  |
| C    | -2.79464700 | -1.28383900 | -1.17716500 |
| C    | -4.16897000 | -1.30516300 | -0.93831200 |
| C    | -2.29689500 | -1.85834500 | -2.35233900 |
| C    | -5.05782000 | -1.89576100 | -1.84146000 |
| C    | -3.15296500 | -2.46379200 | -3.27641500 |
| C    | -4.54672400 | -2.49158700 | -3.01643500 |
| C    | 2.41516100  | -1.27568800 | 0.73245400  |
| C    | 2.05218900  | -2.38412700 | -0.04523900 |
| C    | 3.41792100  | -1.41858100 | 1.69338400  |
| C    | 2.70916200  | -3.61282100 | 0.08323400  |
| C    | 4.17137300  | -2.59466200 | 1.78436800  |
| C    | 3.83210900  | -3.68830800 | 0.95540300  |
| C    | 2.92638000  | 1.62366900  | 0.30064200  |
| C    | 4.29477700  | 1.34323400  | 0.23310100  |
| C    | 2.50690300  | 2.93898500  | 0.04803000  |
| C    | 5.22991900  | 2.32710400  | -0.12549200 |
| C    | 3.40549800  | 3.95245900  | -0.28644100 |
| C    | 4.78156800  | 3.63707600  | -0.40684600 |
| H    | -1.98334800 | -3.39019100 | -0.13336900 |
| H    | -1.25482000 | -5.25753700 | 1.30232400  |
| H    | 1.76494700  | 2.67069900  | 2.37140700  |
| H    | 0.62429200  | 3.21505300  | 4.47713100  |



|   |             |             |             |   |             |             |             |
|---|-------------|-------------|-------------|---|-------------|-------------|-------------|
| H | -2.02368600 | 2.40494300  | 0.54102700  | H | 0.87945200  | 5.23098800  | 0.30011200  |
| H | -3.43553100 | -1.33473000 | 2.06773900  | H | 2.14244900  | 5.72954200  | 1.43970200  |
| H | -4.56696300 | -0.83814800 | -0.04690300 | H | 1.54452200  | 6.86029600  | 0.21100600  |
| H | -1.23006400 | -1.82294300 | -2.55428700 | C | -2.57659300 | -3.04522700 | -4.55922600 |
| H | 1.23703800  | -2.27552300 | -0.74820900 | H | -3.40461700 | -3.53035400 | -5.08233700 |
| H | 3.64927800  | -0.58689800 | 2.35172600  | C | -1.50413100 | -4.11180100 | -4.27878100 |
| H | 4.64359500  | 0.33596800  | 0.42480600  | H | -0.64138400 | -3.69750200 | -3.74669700 |
| H | 1.44881000  | 3.17962700  | 0.09963900  | H | -1.90694000 | -4.92446000 | -3.66400700 |
| N | 5.65280500  | 4.68805800  | -0.83919100 | H | -1.14040400 | -4.54478500 | -5.21798600 |
| C | 6.58092700  | 5.25879600  | 0.12484000  | C | -2.03787300 | -1.92308500 | -5.46709000 |
| H | 6.10292100  | 5.30555900  | 1.10797300  | H | -1.63533900 | -2.33670500 | -6.39912300 |
| H | 7.52838000  | 4.70229700  | 0.22910600  | H | -2.82761800 | -1.20817700 | -5.72191100 |
| H | 6.83154900  | 6.28301500  | -0.17931000 | H | -1.23966100 | -1.35503800 | -4.97347000 |
| C | 6.13480000  | 4.63722600  | -2.21098500 | C | -6.54385600 | -1.86391300 | -1.49934300 |
| H | 5.34230800  | 4.26317300  | -2.86543000 | H | -7.10383400 | -2.24119600 | -2.35619900 |
| H | 6.39826300  | 5.64999000  | -2.54078300 | C | -6.84569400 | -2.78590500 | -0.30170600 |
| H | 7.02414700  | 3.99771200  | -2.35667600 | H | -6.31024100 | -2.45075400 | 0.59525500  |
| N | 4.61541300  | -4.88322400 | 0.90755900  | H | -7.91744300 | -2.78367700 | -0.07254900 |
| N | -5.38319700 | -3.12372900 | -3.99176900 | H | -6.54111800 | -3.81801400 | -0.50678100 |
| N | -5.11146800 | 2.45103800  | 4.00832600  | C | -7.04266600 | -0.43073300 | -1.23226600 |
| C | 4.80637100  | -5.69638900 | 2.09686200  | H | -6.58643900 | -0.00073800 | -0.33285800 |
| H | 4.91614600  | -6.74865900 | 1.80070000  | H | -6.81252500 | 0.23171300  | -2.07352500 |
| H | 5.68913300  | -5.43632800 | 2.70415000  | H | -8.12813200 | -0.43264500 | -1.08155500 |
| H | 3.92123200  | -5.61957700 | 2.73489300  | H | 0.18029100  | -4.84322600 | 3.26148700  |
| C | 5.73002500  | -4.86603900 | -0.02750600 | H | -0.92174100 | 1.60270900  | 5.52080200  |
| H | 5.41893300  | -4.41746100 | -0.97635300 | O | -1.43215600 | -0.86037000 | 4.53207000  |
| H | 6.60773900  | -4.30542600 | 0.34504500  | O | 1.01086600  | -2.38093700 | 4.03499100  |
| H | 6.05111800  | -5.89491700 | -0.23056100 | C | -1.93561400 | -0.66798100 | 5.84792600  |
| C | -6.10910600 | -2.24456400 | -4.89650000 | H | -2.67146200 | 0.14493100  | 5.87908200  |
| H | -6.42906700 | -2.81607200 | -5.77621500 | H | -2.42831600 | -1.60241600 | 6.11875600  |
| H | -7.00650500 | -1.77715100 | -4.45327200 | H | -1.12588600 | -0.46151700 | 6.55876900  |
| H | -5.44510600 | -1.44278300 | -5.23464700 | C | 1.34780600  | -3.40132400 | 4.96511500  |
| C | -6.06523200 | -4.35106600 | -3.61093200 | H | 1.95022100  | -4.18952900 | 4.49674000  |
| H | -6.99968100 | -4.20568300 | -3.04187700 | H | 1.94179700  | -2.91375300 | 5.73901400  |
| H | -6.31498700 | -4.91704200 | -4.51707100 | H | 0.44819200  | -3.84369700 | 5.41194300  |
| H | -5.39215100 | -4.96525400 | -3.00463800 | C | 5.33762700  | -2.64176300 | 2.76765700  |
| C | -4.47573400 | 2.87870400  | 5.24354700  | H | 5.96347900  | -3.49648200 | 2.50881300  |
| H | -3.87520500 | 3.80194700  | 5.14813900  | C | 6.24226400  | -1.40253300 | 2.67674500  |
| H | -5.24425500 | 3.05620000  | 6.00555700  | H | 5.72595800  | -0.49253200 | 3.00185000  |
| H | -3.81333100 | 2.08661700  | 5.60823700  | H | 7.11965300  | -1.52596800 | 3.32124000  |
| C | -6.17933200 | 3.32130500  | 3.53283200  | H | 6.59534900  | -1.24693000 | 1.65217700  |
| H | -6.56667300 | 2.93694900  | 2.58526200  | C | 4.82894100  | -2.83557700 | 4.20860800  |
| H | -6.99885000 | 3.31564500  | 4.26307100  | H | 4.14558300  | -2.02437400 | 4.48733300  |
| H | -5.88169500 | 4.37144900  | 3.37569000  | H | 4.28748100  | -3.78048600 | 4.31344000  |
| C | 6.70945300  | 1.96079400  | -0.18037000 | H | 5.66300700  | -2.84091700 | 4.91967300  |
| H | 7.23239600  | 2.75235400  | -0.71910500 | C | 2.26057800  | -4.84889300 | -0.71185300 |
| C | 6.97424400  | 0.65430000  | -0.95013300 | H | 3.10304400  | -5.14235200 | -1.35345700 |
| H | 6.55362600  | -0.21762900 | -0.43611800 | C | 1.92776900  | -6.05468900 | 0.19636300  |
| H | 6.54523900  | 0.69526600  | -1.95789400 | H | 1.16573400  | -5.77782900 | 0.93034700  |
| H | 8.05221400  | 0.48510700  | -1.04604300 | H | 1.52723600  | -6.87426500 | -0.41147900 |
| C | 7.30338100  | 1.90267500  | 1.24071700  | H | 2.80314100  | -6.42475100 | 0.72421100  |
| H | 8.37203300  | 1.66183700  | 1.20283700  | C | 1.04393100  | -4.60399900 | -1.61610600 |
| H | 7.18721300  | 2.86031500  | 1.75782500  | H | 0.14574900  | -4.40829000 | -1.02375600 |
| H | 6.80403900  | 1.13721500  | 1.84071800  | H | 1.18799800  | -3.76697100 | -2.29528000 |
| C | 2.89182500  | 5.35409800  | -0.58287100 | H | 0.85293000  | -5.49389100 | -2.22553400 |
| H | 3.74629200  | 6.02934700  | -0.48627500 | C | -5.23871400 | -0.39441800 | 3.87554800  |
| C | 2.40128300  | 5.43680900  | -2.04216800 | H | -5.23308400 | 0.07068800  | 4.86790700  |
| H | 1.56449300  | 4.75234900  | -2.21668700 | C | -4.84695900 | -1.87340200 | 4.03144800  |
| H | 2.04934800  | 6.44695800  | -2.27828300 | H | -5.03433600 | -2.43769500 | 3.10905500  |
| H | 3.20518700  | 5.18531700  | -2.74142800 | H | -3.79041100 | -1.99806200 | 4.28554800  |
| C | 1.80245100  | 5.81252500  | 0.40111800  | H | -5.45296900 | -2.33613900 | 4.81768900  |

|    |             |             |             |   |             |             |             |
|----|-------------|-------------|-------------|---|-------------|-------------|-------------|
| C  | -6.68056300 | -0.30002700 | 3.33394800  | C | 0.78357500  | 1.48298200  | 1.65273900  |
| H  | -6.73702000 | -0.71467500 | 2.31973300  | C | -0.64339600 | 1.65131200  | 3.60914300  |
| H  | -7.36646800 | -0.87207000 | 3.96968000  | C | 1.16510700  | 2.82156300  | 1.83719000  |
| H  | -7.02878400 | 0.73407600  | 3.30224400  | C | -0.25484700 | 2.98089600  | 3.78826100  |
| C  | -3.32389900 | 4.07340300  | 2.19410300  | C | 0.66001700  | 3.55225000  | 2.90758700  |
| H  | -3.86380700 | 4.43684700  | 3.06955200  | P | -1.66937300 | -0.24281800 | -0.05753400 |
| C  | -1.87536600 | 4.57407500  | 2.34482400  | P | 1.46907600  | 0.52767300  | 0.22589300  |
| H  | -1.23818600 | 4.26591700  | 1.50898500  | C | -2.55388300 | 1.21430700  | 0.62713900  |
| H  | -1.85697000 | 5.66905100  | 2.38766700  | C | -2.24743300 | 2.51850100  | 0.23446600  |
| H  | -1.41967500 | 4.18237400  | 3.25911400  | C | -3.47547400 | 1.00677300  | 1.66066200  |
| C  | -4.00500100 | 4.67125200  | 0.94704600  | C | -2.82958200 | 3.62614100  | 0.87217200  |
| H  | -3.52279400 | 4.33081200  | 0.02514800  | C | -4.08426800 | 2.07538600  | 2.31527800  |
| H  | -5.05873200 | 4.37760200  | 0.89745800  | C | -3.74996700 | 3.39755300  | 1.92434500  |
| H  | -3.95598400 | 5.76620800  | 0.96860400  | C | -2.95649300 | -1.33362800 | -0.79675000 |
| Rh | -0.08566100 | 0.83838600  | -1.08295100 | C | -4.31371900 | -1.01808100 | -0.76883400 |
| C  | 4.25098100  | -1.52451200 | -2.57067000 | C | -2.55874300 | -2.55699400 | -1.35888300 |
| C  | 3.27744100  | -0.54410400 | -2.44772400 | C | -5.28169800 | -1.89370500 | -1.27848500 |
| C  | 1.99812800  | -0.70124800 | -3.02123800 | C | -3.49513300 | -3.48293300 | -1.83058100 |
| C  | 1.76656800  | -1.84926900 | -3.80518800 | C | -4.87404500 | -3.14281600 | -1.79750400 |
| C  | 2.74259700  | -2.82960800 | -3.96402000 | C | 2.21490400  | -0.93970000 | 1.02440000  |
| C  | 3.95764200  | -2.66830500 | -3.30805500 | C | 1.87273200  | -2.21738200 | 0.56920500  |
| H  | 5.22051500  | -1.42395500 | -2.09687600 | C | 3.10011100  | -0.81171200 | 2.09524400  |
| H  | 3.51008000  | 0.34355000  | -1.87558900 | C | 2.40308600  | -3.36971200 | 1.15073400  |
| H  | 0.80755700  | -1.97649700 | -4.29675900 | C | 3.73027900  | -1.93432300 | 2.64551000  |
| H  | 2.56278300  | -3.72308700 | -4.55159600 | C | 3.37042800  | -3.21997000 | 2.18046800  |
| F  | 4.87723900  | -3.64988300 | -3.37770500 | C | 2.80115000  | 1.63465700  | -0.39813100 |
| C  | 0.93813200  | 0.30743000  | -2.90760400 | C | 4.14171700  | 1.53681100  | -0.03202200 |
| H  | 0.09658300  | 0.09342000  | -3.56143200 | C | 2.42707100  | 2.61151400  | -1.33001700 |
| C  | 1.29531700  | 1.77209400  | -2.85566500 | C | 5.12148000  | 2.34984600  | -0.62434400 |
| H  | 2.36703500  | 1.96265800  | -2.79185900 | C | 3.36536700  | 3.44773100  | -1.93118300 |
| H  | 0.83233700  | 2.31737900  | -3.68366200 | C | 4.73508200  | 3.29467100  | -1.59784000 |
| C  | -1.59536000 | 3.54841300  | -2.72578300 | H | -2.30278300 | -2.97695200 | 0.92225900  |
| C  | -1.61514600 | 4.06236700  | -4.03144900 | H | -1.72086600 | -4.23699400 | 2.92814800  |
| C  | -1.35641300 | 5.41533600  | -4.26130700 | H | 1.86254200  | 3.29093900  | 1.15554300  |
| C  | -1.07834700 | 6.27354200  | -3.19435400 | H | 0.97368800  | 4.58189600  | 3.05466300  |
| C  | -1.04603200 | 5.76593700  | -1.89485000 | H | -1.49984900 | 2.66705200  | -0.53594100 |
| C  | -1.29255900 | 4.41122900  | -1.66262900 | H | -3.68516900 | -0.00663400 | 1.98122300  |
| H  | -1.84526800 | 3.40479200  | -4.86490700 | H | -4.63411900 | -0.07401100 | -0.34431200 |
| H  | -1.37833600 | 5.79987800  | -5.27749700 | H | -1.50315500 | -2.81662500 | -1.36766700 |
| H  | -0.88857600 | 7.32758900  | -3.37511300 | H | 1.16902000  | -2.29154900 | -0.25023500 |
| H  | -0.82562100 | 6.42111500  | -1.05714100 | H | 3.31566200  | 0.17139000  | 2.50214000  |
| H  | -1.26658100 | 4.02932800  | -0.64872000 | H | 4.45080300  | 0.80128700  | 0.70080000  |
| Se | -2.10288600 | 1.67820700  | -2.42636300 | H | 1.38230600  | 2.68724900  | -1.61298100 |
| H  | 0.87728500  | 2.33019300  | -1.96444300 | N | 5.67023300  | 4.12375300  | -2.30038500 |

#### 24-ts-S

B3LYP-D3 SCF energy: -4539.834164 a.u.

B3LYP-D3 enthalpy: -4537.922311 a.u.

B3LYP-D3 free energy: -4538.169374 a.u.

M06 SCF energy in solution: -4538.800694 a.u.

Imaginary frequency: -62.74 cm<sup>-1</sup>

#### Cartesian coordinates

| ATOM | X           | Y           | Z          |   |             |             |             |
|------|-------------|-------------|------------|---|-------------|-------------|-------------|
| C    | -0.09434800 | -1.35032800 | 3.63796400 | N | -5.80177500 | -4.11915500 | -2.28473800 |
| C    | -0.47654400 | -0.57325500 | 2.51790700 | N | -4.34114200 | 4.45464300  | 2.69390100  |
| C    | -1.23857000 | -1.17947500 | 1.49844600 | C | 3.81392300  | -4.73343500 | 4.10938100  |
| C    | -1.67652200 | -2.50416500 | 1.66405800 | H | 3.83521200  | -5.82432300 | 4.23704300  |
| C    | -1.34697500 | -3.22461000 | 2.80675800 | H | 4.59199100  | -4.31182200 | 4.76798200  |
| C    | -0.53505400 | -2.66611300 | 3.78824400 | H | 2.84171500  | -4.37257200 | 4.45887300  |
| C    | -0.10879500 | 0.87402200  | 2.55327900 | C | 5.22060900  | -4.82687400 | 2.09600800  |
|      |             |             |            | H | 5.16841400  | -4.68255300 | 1.01350300  |

|   |             |             |             |    |             |             |             |
|---|-------------|-------------|-------------|----|-------------|-------------|-------------|
| H | 6.09930000  | -4.26980800 | 2.47194600  | O  | 0.70957900  | -0.73061300 | 4.54598000  |
| H | 5.39079200  | -5.89258900 | 2.29413000  | C  | -1.85765800 | 1.61023100  | 5.67543500  |
| C | -6.37715000 | -3.87649300 | -3.59817800 | H  | -2.46563700 | 2.51454600  | 5.55170300  |
| H | -6.80315800 | -4.81042000 | -3.98380800 | H  | -2.44485900 | 0.86408100  | 6.21305600  |
| H | -7.17514800 | -3.11220600 | -3.61436300 | H  | -0.95366000 | 1.85170800  | 6.24860600  |
| H | -5.58855600 | -3.55531600 | -4.28692700 | C  | 0.74441800  | -1.24501900 | 5.87075600  |
| C | -6.66920300 | -4.77848800 | -1.31937000 | H  | 1.25293700  | -2.21542000 | 5.92079000  |
| H | -7.57625700 | -4.21045900 | -1.04939600 | H  | 1.31321700  | -0.52169700 | 6.45707300  |
| H | -6.99208900 | -5.74420500 | -1.72755800 | H  | -0.26930400 | -1.34306500 | 6.27944500  |
| H | -6.10721100 | -4.97178200 | -0.40075400 | C  | 4.79478600  | -1.71631400 | 3.71758800  |
| C | -3.52914100 | 5.00420700  | 3.76504600  | H  | 5.32726100  | -2.65717600 | 3.86500900  |
| H | -2.76308800 | 5.72732800  | 3.42900500  | C  | 5.84936900  | -0.68350900 | 3.28283500  |
| H | -4.17616500 | 5.51551000  | 4.48878300  | H  | 5.42245400  | 0.32148100  | 3.19706000  |
| H | -3.01133500 | 4.19176800  | 4.28213100  | H  | 6.65805800  | -0.63154300 | 4.02045100  |
| C | -5.25048500 | 5.40056700  | 2.06866600  | H  | 6.28805200  | -0.94833700 | 2.31493000  |
| H | -5.81522200 | 4.89893200  | 1.27819500  | C  | 4.15978200  | -1.31264400 | 5.06067200  |
| H | -5.96757000 | 5.75817100  | 2.81970600  | H  | 3.54998500  | -0.40916300 | 4.94609100  |
| H | -4.76030200 | 6.28625100  | 1.63105900  | H  | 3.51037300  | -2.10678700 | 5.44036200  |
| C | 6.57048200  | 2.17242100  | -0.18347400 | H  | 4.93203600  | -1.11526800 | 5.81321900  |
| H | 7.19836200  | 2.81666700  | -0.79925400 | C  | 1.96652400  | -4.75809000 | 0.67168100  |
| C | 7.06151700  | 0.72824300  | -0.39780200 | H  | 2.87602800  | -5.30174100 | 0.38588900  |
| H | 6.51368300  | 0.01864100  | 0.23226900  | C  | 1.26307200  | -5.57123200 | 1.77837100  |
| H | 6.93343400  | 0.41626600  | -1.43996500 | H  | 0.35369000  | -5.05756200 | 2.10208800  |
| H | 8.12352600  | 0.64475200  | -0.14101900 | H  | 0.97683300  | -6.55678200 | 1.39203700  |
| C | 6.75906800  | 2.62218900  | 1.27752700  | H  | 1.90653700  | -5.72054300 | 2.64388200  |
| H | 7.80709700  | 2.51654700  | 1.58055100  | C  | 1.03944900  | -4.71738800 | -0.55272700 |
| H | 6.46905500  | 3.67077200  | 1.40641500  | H  | 0.08539900  | -4.24047400 | -0.29718800 |
| H | 6.15096900  | 2.01995600  | 1.96061200  | H  | 1.48116700  | -4.17934100 | -1.39397000 |
| C | 2.92824500  | 4.44083000  | -2.99959200 | H  | 0.81632400  | -5.73747500 | -0.88362000 |
| H | 3.70167000  | 5.21155600  | -3.05804300 | C  | -5.09256000 | 1.82105500  | 3.43211200  |
| C | 2.87600000  | 3.74151200  | -4.37265600 | H  | -4.90848600 | 2.56731400  | 4.21260100  |
| H | 2.16490800  | 2.90514100  | -4.35646500 | C  | -4.97269100 | 0.42685200  | 4.06899800  |
| H | 2.56670100  | 4.44243400  | -5.15697500 | H  | -5.32523700 | -0.36031300 | 3.39053700  |
| H | 3.85351900  | 3.33233300  | -4.64436100 | H  | -3.93957300 | 0.19384900  | 4.34423800  |
| C | 1.58963600  | 5.12634700  | -2.68519800 | H  | -5.59642700 | 0.37616300  | 4.96814400  |
| H | 0.74775100  | 4.42470500  | -2.73543400 | C  | -6.53001800 | 2.04444600  | 2.92023400  |
| H | 1.58751400  | 5.57210800  | -1.68474300 | H  | -6.76297600 | 1.34250600  | 2.10999000  |
| H | 1.39172200  | 5.91929500  | -3.41487600 | H  | -7.25500300 | 1.88003800  | 3.72594700  |
| C | -3.05563300 | -4.88754600 | -2.23088600 | H  | -6.66494000 | 3.06057000  | 2.54260100  |
| H | -3.89679800 | -5.33974400 | -2.76208800 | C  | -2.46227100 | 5.04866900  | 0.44779100  |
| C | -2.81633800 | -5.72012300 | -0.95303400 | H  | -2.65491500 | 5.69929800  | 1.30428500  |
| H | -1.99059400 | -5.30667700 | -0.36200600 | C  | -0.97914100 | 5.22160200  | 0.08389300  |
| H | -3.71038100 | -5.73678300 | -0.32009000 | H  | -0.70986800 | 4.65225900  | -0.81193100 |
| H | -2.56183700 | -6.75512600 | -1.20880200 | H  | -0.76829900 | 6.27564900  | -0.12982600 |
| C | -1.82710200 | -4.93726600 | -3.15123300 | H  | -0.32624100 | 4.89208600  | 0.89366800  |
| H | -1.59280400 | -5.97866900 | -3.39838200 | C  | -3.33633600 | 5.55175600  | -0.71938200 |
| H | -2.01152300 | -4.40740300 | -4.09193700 | H  | -3.07179400 | 5.04489900  | -1.64837300 |
| H | -0.93316700 | -4.50988100 | -2.68250200 | H  | -4.40132100 | 5.37783000  | -0.54965900 |
| C | -6.74665700 | -1.47790700 | -1.18273900 | H  | -3.18407300 | 6.62713000  | -0.86834200 |
| H | -7.35435800 | -2.23620900 | -1.67749500 | Rh | 0.08597600  | 0.04094600  | -1.53545100 |
| C | -7.19538000 | -1.41317900 | 0.29050300  | Se | 2.15638500  | -0.45305400 | -3.10115700 |
| H | -6.62652600 | -0.65636000 | 0.84337500  | C  | 3.29115200  | -1.91446700 | -2.44242200 |
| H | -8.25737800 | -1.15189700 | 0.35962200  | C  | 4.32022900  | -1.65275500 | -1.53117900 |
| H | -7.04574900 | -2.37552300 | 0.79167400  | C  | 3.16396300  | -3.19392500 | -2.99579700 |
| C | -7.02262500 | -0.14544800 | -1.90291000 | C  | 5.20142100  | -2.66883400 | -1.16162700 |
| H | -6.47718300 | 0.68689900  | -1.44241900 | H  | 4.43817600  | -0.65895300 | -1.12128200 |
| H | -6.73810600 | -0.20277700 | -2.96037400 | C  | 4.04668600  | -4.20933100 | -2.61984900 |
| H | -8.08980500 | 0.09800600  | -1.85675800 | H  | 2.38191400  | -3.39807800 | -3.72176700 |
| H | -0.25829700 | -3.24848900 | 4.65865200  | C  | 5.06585900  | -3.95065300 | -1.70077800 |
| H | -0.65071200 | 3.56755200  | 4.60798300  | H  | 5.99568100  | -2.45405300 | -0.45167700 |
| O | -1.53159600 | 1.01823400  | 4.42504200  | H  | 3.93903500  | -5.20089100 | -3.05108400 |

|   |             |             |             |   |             |             |             |
|---|-------------|-------------|-------------|---|-------------|-------------|-------------|
| H | 5.75878300  | -4.73901500 | -1.42028000 | C | 2.66602000  | 2.29193800  | -1.34706500 |
| C | -3.65309300 | 1.18793600  | -3.19575800 | C | 5.26270800  | 1.26683900  | -1.09878500 |
| C | -2.71098900 | 0.20865600  | -3.42878400 | C | 3.70751000  | 2.92205000  | -2.02689900 |
| C | -1.33575700 | 0.54868900  | -3.60419000 | C | 5.01851500  | 2.38284100  | -1.93272600 |
| C | -0.95167400 | 1.91590700  | -3.42763800 | H | -2.37957400 | -2.90139900 | 1.05667600  |
| C | -1.90287400 | 2.90104700  | -3.18815200 | H | -1.79388800 | -4.00280600 | 3.17301500  |
| C | -3.23790200 | 2.51954400  | -3.09351700 | H | 2.07462700  | 3.16046900  | 0.89469900  |
| H | -4.70472500 | 0.95297200  | -3.09312700 | H | 1.04131000  | 4.77987900  | 2.43326100  |
| H | -3.02778900 | -0.82198400 | -3.52367500 | H | -1.41250300 | 2.41031300  | -1.11669400 |
| H | 0.08190300  | 2.19837700  | -3.59943200 | H | -3.82691100 | 0.44644400  | 1.81159700  |
| H | -1.62678600 | 3.94485700  | -3.09929000 | H | -4.66847600 | -0.01016100 | -0.60536400 |
| F | -4.17639300 | 3.45324500  | -2.90354100 | H | -1.56664500 | -2.88164700 | -1.29861100 |
| C | -0.39523100 | -0.37758900 | -4.15768400 | H | 1.22851000  | -2.48171600 | -0.26599600 |
| H | 0.38007100  | 0.07740000  | -4.76033400 | H | 3.07898300  | 0.03543100  | 2.66279600  |
| C | -0.74204100 | -1.79020000 | -4.49927800 | H | 4.37601400  | -0.19525900 | 0.19992900  |
| H | 0.15380600  | -2.35397900 | -4.76338100 | H | 1.65657300  | 2.68306300  | -1.44350600 |
| H | -1.42448200 | -1.80010000 | -5.36400500 | N | 6.04182000  | 3.00549500  | -2.71209200 |
| H | -1.24608400 | -2.29736800 | -3.67730700 | C | 6.82998400  | 4.04177200  | -2.06406000 |

## 25

B3LYP-D3 SCF energy: -4298.369141 a.u.

B3LYP-D3 enthalpy: -4296.568849 a.u.

B3LYP-D3 free energy: -4296.804949 a.u.

M06 SCF energy in solution: -4297.379621 a.u.

### Cartesian coordinates

| ATOM | X           | Y           | Z           |   |             |             |             |
|------|-------------|-------------|-------------|---|-------------|-------------|-------------|
| C    | -0.31738200 | -0.99618100 | 3.71618000  | N | -5.73635100 | -3.91464900 | -2.87913300 |
| C    | -0.64338900 | -0.33778900 | 2.50979800  | N | -4.35858400 | 4.97575200  | 1.40849500  |
| C    | -1.38242200 | -1.04222900 | 1.53550400  | C | 3.08656300  | -4.83890500 | 4.40031700  |
| C    | -1.79404600 | -2.36006100 | 1.78833800  | H | 3.11404100  | -5.92157800 | 4.57825200  |
| C    | -1.46890200 | -2.98293000 | 2.99016100  | H | 3.64990000  | -4.35438000 | 5.21662700  |
| C    | -0.72687600 | -2.31059300 | 3.95610700  | H | 2.04432600  | -4.51056600 | 4.46656000  |
| C    | -0.20430900 | 1.08827200  | 2.38467600  | C | 4.94949300  | -4.99374300 | 2.79034700  |
| C    | 0.81718200  | 1.51011400  | 1.51085100  | H | 5.15287200  | -4.89930300 | 1.71854800  |
| C    | -0.78087800 | 2.03751600  | 3.26073000  | H | 5.72427300  | -4.42375700 | 3.33409600  |
| C    | 1.26910600  | 2.83830900  | 1.54168700  | H | 5.05732800  | -6.05007700 | 3.06514600  |
| C    | -0.34859100 | 3.36733900  | 3.26042000  | C | -6.31243500 | -3.44989800 | -4.13308100 |
| C    | 0.68686900  | 3.75313100  | 2.41287800  | H | -6.57079900 | -4.31880100 | -4.75132000 |
| P    | -1.74453800 | -0.27174300 | -0.10549400 | H | -7.22321700 | -2.83637600 | -4.02551000 |
| P    | 1.45159700  | 0.34408500  | 0.23058800  | H | -5.57003400 | -2.85721600 | -4.67597500 |
| C    | -2.56671800 | 1.30298100  | 0.30009500  | C | -6.60280500 | -4.75607500 | -2.06605200 |
| C    | -2.18778000 | 2.46938600  | -0.35909100 | H | -7.47549200 | -4.22889300 | -1.64085300 |
| C    | -3.55186500 | 1.35729900  | 1.29296800  | H | -6.97794400 | -5.58586200 | -2.67706300 |
| C    | -2.74672900 | 3.70771400  | -0.02373200 | H | -6.02742500 | -5.17833400 | -1.23566600 |
| C    | -4.16363500 | 2.56402900  | 1.63115100  | C | -3.58785600 | 5.76694600  | 2.35417800  |
| C    | -3.74486600 | 3.75361700  | 0.97544500  | H | -2.75128300 | 6.32739500  | 1.89774200  |
| C    | -3.01082400 | -1.34760200 | -0.87731000 | H | -4.24797500 | 6.49096400  | 2.84703000  |
| C    | -4.34391000 | -0.96490100 | -1.00305400 | H | -3.16673700 | 5.10970300  | 3.12243300  |
| C    | -2.60721600 | -2.58782800 | -1.39662100 | C | -5.14743300 | 5.74702700  | 0.45807000  |
| C    | -5.28620300 | -1.79627700 | -1.62788800 | H | -5.66230800 | 5.06564600  | -0.22494800 |
| C    | -3.50919800 | -3.43896800 | -2.03267900 | H | -5.90887500 | 6.31887800  | 1.00414900  |
| C    | -4.86200800 | -3.02699100 | -2.17141500 | H | -4.56821100 | 6.46267400  | -0.14924800 |
| C    | 2.10189400  | -1.10381700 | 1.12383600  | C | 6.66798800  | 0.75645600  | -0.79479000 |
| C    | 1.85045300  | -2.38152900 | 0.61835600  | H | 7.36812500  | 1.23553100  | -1.47947200 |
| C    | 2.88938400  | -0.95868000 | 2.26837400  | C | 6.81019500  | -0.76538800 | -0.97835900 |
| C    | 2.35481700  | -3.51987900 | 1.24988700  | H | 6.20758900  | -1.31854500 | -0.24758200 |
| C    | 3.44347900  | -2.07219700 | 2.90880900  | H | 6.49560500  | -1.07441300 | -1.97839200 |
| C    | 3.14197400  | -3.36474000 | 2.41664800  | H | 7.85381800  | -1.06581000 | -0.83304100 |
| C    | 2.88895300  | 1.16037000  | -0.55033600 | C | 7.07292400  | 1.17721000  | 0.63323800  |
| C    | 4.18703500  | 0.66191500  | -0.43581900 | H | 8.09782100  | 0.85537000  | 0.85173400  |
|      |             |             |             | H | 7.02157800  | 2.26468800  | 0.75601400  |

|   |             |             |             |                                               |             |             |             |
|---|-------------|-------------|-------------|-----------------------------------------------|-------------|-------------|-------------|
| H | 6.41024200  | 0.72317300  | 1.37879000  | H                                             | 3.17206900  | -4.68200700 | -1.13262700 |
| C | 3.41573600  | 4.18938600  | -2.82093300 | H                                             | 2.02487300  | -6.03757600 | -1.14526100 |
| H | 4.33098300  | 4.44293100  | -3.36276300 | C                                             | -5.28358900 | 2.59694000  | 2.66801800  |
| C | 2.29243400  | 4.00689400  | -3.85783100 | H                                             | -5.12218200 | 3.47978000  | 3.29725600  |
| H | 1.34110000  | 3.72936900  | -3.38678400 | C                                             | -5.32382700 | 1.35706000  | 3.57625800  |
| H | 2.12549900  | 4.94241800  | -4.40319400 | H                                             | -5.67968400 | 0.47288400  | 3.03264500  |
| H | 2.54602900  | 3.23593500  | -4.59345100 | H                                             | -4.34083400 | 1.11737000  | 3.99112200  |
| C | 3.08053000  | 5.35050100  | -1.86281800 | H                                             | -6.02092000 | 1.52638000  | 4.40391900  |
| H | 2.15930400  | 5.14653600  | -1.30321200 | C                                             | -6.65261700 | 2.77224000  | 1.97840600  |
| H | 3.88391700  | 5.51152800  | -1.13540500 | H                                             | -6.85173300 | 1.93054400  | 1.30340600  |
| H | 2.93507700  | 6.28281200  | -2.42062200 | H                                             | -7.45546200 | 2.80173600  | 2.72426400  |
| C | -3.03917600 | -4.76666500 | -2.61668300 | H                                             | -6.69341000 | 3.69606500  | 1.39827800  |
| H | -3.88972900 | -5.45339200 | -2.58114500 | C                                             | -2.26442800 | 4.94492000  | -0.77541600 |
| C | -1.87878100 | -5.40564300 | -1.83801600 | H                                             | -2.61501900 | 5.83038000  | -0.24241400 |
| H | -0.94392700 | -4.84193100 | -1.94899000 | C                                             | -0.72916100 | 5.04405000  | -0.83574500 |
| H | -2.09778600 | -5.47765100 | -0.76693300 | H                                             | -0.29307900 | 4.24236700  | -1.44366200 |
| H | -1.68724800 | -6.41611100 | -2.21489900 | H                                             | -0.43048000 | 5.99470000  | -1.29161600 |
| C | -2.66455500 | -4.59375600 | -4.10185400 | H                                             | -0.28668400 | 4.97946700  | 0.16217100  |
| H | -2.37816600 | -5.55521000 | -4.54353300 | C                                             | -2.86296500 | 4.97711800  | -2.19562200 |
| H | -3.50388900 | -4.19069800 | -4.67550600 | H                                             | -2.52777600 | 4.10601500  | -2.77282100 |
| H | -1.81390200 | -3.90814500 | -4.21207600 | H                                             | -3.95719800 | 4.95938400  | -2.17048000 |
| C | -6.73471100 | -1.32097100 | -1.67299100 | H                                             | -2.54642700 | 5.87971600  | -2.73104100 |
| H | -7.34528300 | -2.11332100 | -2.10765500 | Rh                                            | -0.00616000 | -0.09825900 | -1.50679700 |
| C | -7.28398500 | -1.06087600 | -0.25661100 | C                                             | 3.01565300  | 0.32456500  | -4.10894300 |
| H | -6.75152100 | -0.24145000 | 0.24035300  | C                                             | 1.62582800  | 0.33242000  | -4.05792300 |
| H | -8.34336700 | -0.78503600 | -0.30536700 | C                                             | 0.90795100  | -0.82468000 | -3.67528700 |
| H | -7.19060800 | -1.95214400 | 0.37364800  | C                                             | 1.64517100  | -1.98590100 | -3.32559400 |
| C | -6.88554800 | -0.07398300 | -2.56470900 | C                                             | 3.03401100  | -1.99609400 | -3.35900100 |
| H | -6.30851800 | 0.76929800  | -2.16628500 | C                                             | 3.69327300  | -0.83605600 | -3.75830500 |
| H | -6.53400800 | -0.27087300 | -3.58346300 | H                                             | 3.57770400  | 1.20241200  | -4.40053100 |
| H | -7.93543800 | 0.23544500  | -2.61902200 | H                                             | 1.09394600  | 1.23339200  | -4.34191700 |
| H | -0.46948900 | -2.80326600 | 4.88676200  | H                                             | 1.10770600  | -2.88226900 | -3.03259100 |
| H | -0.79800800 | 4.09671200  | 3.92276500  | H                                             | 3.60460900  | -2.87637000 | -3.08512600 |
| O | -1.75473700 | 1.56993100  | 4.08977300  | F                                             | 5.04003300  | -0.83896400 | -3.81932400 |
| O | 0.42001600  | -0.27845400 | 4.60999900  | C                                             | -0.55234300 | -0.83865900 | -3.50041300 |
| C | -2.23865900 | 2.42741800  | 5.11646300  | H                                             | -1.03304400 | -1.81228300 | -3.45598100 |
| H | -2.80490300 | 3.27081700  | 4.70115800  | C                                             | -1.32863500 | 0.29739800  | -3.34442900 |
| H | -2.90733600 | 1.81705800  | 5.72469100  | H                                             | -0.98198300 | 1.29185100  | -3.61158200 |
| H | -1.41892200 | 2.80494600  | 5.74052500  | H                                             | -2.40028600 | 0.19042400  | -3.20917800 |
| C | 0.23225300  | -0.54978300 | 5.99546300  |                                               |             |             |             |
| H | 0.68996000  | -1.49930100 | 6.29596600  | <b>26</b>                                     |             |             |             |
| H | 0.73067600  | 0.26187400  | 6.52853200  | B3LYP-D3 SCF energy: -4539.860002 a.u.        |             |             |             |
| H | -0.83536600 | -0.56065100 | 6.24631900  | B3LYP-D3 enthalpy: -4537.950348 a.u.          |             |             |             |
| C | 4.36245900  | -1.84211600 | 4.10423100  | B3LYP-D3 free energy: -4538.202402 a.u.       |             |             |             |
| H | 4.80294100  | -2.79941100 | 4.38757000  | M06 SCF energy in solution: -4538.832033 a.u. |             |             |             |
| C | 5.53165500  | -0.90623300 | 3.74273700  |                                               |             |             |             |
| H | 5.18406600  | 0.10563900  | 3.50467800  | Cartesian coordinates                         |             |             |             |
| H | 6.22851700  | -0.82517600 | 4.58455800  | ATOM                                          | X           | Y           | Z           |
| H | 6.08587800  | -1.28414400 | 2.87630500  | C                                             | -0.31365800 | 1.20111900  | 3.99798700  |
| C | 3.58008800  | -1.31176300 | 5.31860000  | C                                             | 0.08356500  | 0.50889800  | 2.83385900  |
| H | 3.06608400  | -0.37490600 | 5.07925900  | C                                             | 0.89325600  | 1.17910600  | 1.89688600  |
| H | 2.82058300  | -2.03473200 | 5.63339100  | C                                             | 1.31537700  | 2.49361700  | 2.14264900  |
| H | 4.25344600  | -1.13282300 | 6.16474300  | C                                             | 0.93804100  | 3.14286300  | 3.31502200  |
| C | 2.00540400  | -4.89998200 | 0.70864100  | C                                             | 0.11768400  | 2.50770600  | 4.24181400  |
| H | 2.68895800  | -5.61291300 | 1.17617500  | C                                             | -0.29353600 | -0.93419800 | 2.72502100  |
| C | 0.57509700  | -5.28739100 | 1.12908100  | C                                             | -1.16987100 | -1.46004900 | 1.75174400  |
| H | -0.15542400 | -4.57807800 | 0.72332600  | C                                             | 0.23675000  | -1.80836700 | 3.70767100  |
| H | 0.32022100  | -6.28954500 | 0.76449800  | C                                             | -1.53816700 | -2.81462600 | 1.81482100  |
| H | 0.47326200  | -5.27929500 | 2.21942100  | C                                             | -0.10480200 | -3.16218300 | 3.72912700  |
| C | 2.17262000  | -5.00299300 | -0.81656800 | C                                             | -1.01028200 | -3.64999900 | 2.79200000  |
| H | 1.43616400  | -4.38741800 | -1.34685600 | P                                             | 1.42727500  | 0.30660200  | 0.36097300  |

|   |             |             |             |   |             |             |             |
|---|-------------|-------------|-------------|---|-------------|-------------|-------------|
| P | -1.75517400 | -0.40776400 | 0.32894100  | C | 6.03251900  | 5.21004500  | -1.06072200 |
| C | 2.34864200  | -1.12941400 | 1.02386000  | H | 6.83978000  | 4.84370900  | -0.40134100 |
| C | 2.22152600  | -2.39102600 | 0.44749900  | H | 6.43592300  | 6.03942000  | -1.65408600 |
| C | 3.17845800  | -0.96530500 | 2.14058200  | H | 5.23213800  | 5.60482200  | -0.42634800 |
| C | 2.88575700  | -3.50384900 | 0.98317700  | C | 3.71327200  | -5.23148100 | 3.62745500  |
| C | 3.89808800  | -2.03338300 | 2.67261100  | H | 3.03963900  | -5.95619100 | 3.13433300  |
| C | 3.74058100  | -3.32016500 | 2.09251000  | H | 4.40979500  | -5.79697000 | 4.25844400  |
| C | 2.70854700  | 1.42781500  | -0.33443700 | H | 3.10124700  | -4.59903900 | 4.27881600  |
| C | 4.07141200  | 1.25238100  | -0.10019700 | C | 5.47454100  | -5.09825100 | 1.92499400  |
| C | 2.28659100  | 2.52232700  | -1.10402300 | H | 5.96220800  | -4.39482400 | 1.24432400  |
| C | 5.02239000  | 2.15401900  | -0.59817500 | H | 6.23884000  | -5.49965000 | 2.60320700  |
| C | 3.20215000  | 3.44747200  | -1.61202700 | H | 5.08966200  | -5.93962800 | 1.32451800  |
| C | 4.58754900  | 3.24851900  | -1.37477200 | C | -6.86710400 | -0.68829300 | -1.21722200 |
| C | -2.47844400 | 1.06607000  | 1.14888400  | H | -7.52066300 | -1.27310000 | -1.86532900 |
| C | -2.18152100 | 2.36718500  | 0.72529500  | C | -6.73123200 | 0.70574700  | -1.85948300 |
| C | -3.35107400 | 0.87539300  | 2.22497600  | H | -6.13561100 | 1.38344800  | -1.23647900 |
| C | -2.71348600 | 3.47799300  | 1.39387600  | H | -6.25205300 | 0.64261100  | -2.84299600 |
| C | -3.92904100 | 1.95668000  | 2.89608400  | H | -7.71949400 | 1.16106800  | -1.98924000 |
| C | -3.56867700 | 3.26596000  | 2.50474800  | C | -7.54204500 | -0.60035200 | 0.16336000  |
| C | -3.19727300 | -1.31210600 | -0.37544300 | H | -8.52461400 | -0.12137900 | 0.08258900  |
| C | -4.47228700 | -0.74991000 | -0.45442800 | H | -7.68111100 | -1.59464600 | 0.60155800  |
| C | -2.98099400 | -2.55725700 | -0.98545300 | H | -6.93617600 | -0.01065000 | 0.85830300  |
| C | -5.52049600 | -1.39849600 | -1.12663900 | C | -3.71172300 | -4.61336200 | -2.24964000 |
| C | -4.00661700 | -3.26042600 | -1.61534800 | H | -4.67714200 | -5.10270400 | -2.40512100 |
| C | -5.29356900 | -2.66937800 | -1.69816600 | C | -3.05736200 | -4.42843300 | -3.63313300 |
| H | 1.95124000  | 3.00706000  | 1.43269800  | H | -2.09372300 | -3.91194900 | -3.54964500 |
| H | 1.27767000  | 4.15687600  | 3.50224500  | H | -2.87617800 | -5.39915200 | -4.10970600 |
| H | -2.25552700 | -3.22488100 | 1.12000500  | H | -3.69468200 | -3.83892900 | -4.30003700 |
| H | -1.30813500 | -4.69419500 | 2.82474600  | C | -2.84866500 | -5.51924300 | -1.35411100 |
| H | 1.56620400  | -2.51805500 | -0.40768900 | H | -1.83167400 | -5.12807800 | -1.22075900 |
| H | 3.24846000  | 0.01238100  | 2.60117500  | H | -3.29209600 | -5.63692100 | -0.35888500 |
| H | 4.41180100  | 0.41101500  | 0.49087700  | H | -2.75660800 | -6.51456700 | -1.80336900 |
| H | 1.22558700  | 2.64915600  | -1.29761000 | C | 2.72126200  | 4.62873800  | -2.44537900 |
| H | -1.49840200 | 2.50632300  | -0.10816600 | H | 3.42959700  | 5.44736200  | -2.28721900 |
| H | -3.58507100 | -0.13516500 | 2.54767100  | C | 1.32207800  | 5.12139700  | -2.04650800 |
| H | -4.66033900 | 0.21648000  | -0.00010400 | H | 0.54580200  | 4.38907900  | -2.28797200 |
| H | -1.98145700 | -2.98071800 | -0.97872900 | H | 1.25953300  | 5.34035700  | -0.97404700 |
| N | -6.30954100 | -3.41307400 | -2.38207800 | H | 1.07700300  | 6.03582700  | -2.59771600 |
| C | -7.40969700 | -3.93712100 | -1.58587900 | C | 2.77048500  | 4.26280500  | -3.94233400 |
| H | -7.02112400 | -4.31725800 | -0.63611600 | H | 2.34172500  | 5.06499900  | -4.55452000 |
| H | -8.20467300 | -3.20495600 | -1.36145100 | H | 3.80029000  | 4.09027600  | -4.26799200 |
| H | -7.87275900 | -4.77456200 | -2.12244200 | H | 2.19231400  | 3.35202000  | -4.12948700 |
| C | -6.65957600 | -2.98331200 | -3.72802700 | C | 6.48417800  | 1.91429400  | -0.23514000 |
| H | -5.75322700 | -2.69050500 | -4.26592000 | H | 7.08807600  | 2.70311500  | -0.68448800 |
| H | -7.12028200 | -3.82028300 | -4.26727100 | C | 6.69287600  | 2.00175900  | 1.28965900  |
| H | -7.36379300 | -2.13303900 | -3.76544500 | H | 6.13175400  | 1.22158100  | 1.81730400  |
| N | -4.01944900 | 4.42817200  | 3.21178900  | H | 7.75271900  | 1.87570000  | 1.53844400  |
| N | 5.48704000  | 4.20104800  | -1.95661600 | H | 6.36251700  | 2.97154600  | 1.67790200  |
| N | 4.46561300  | -4.39616400 | 2.70583600  | C | 6.99360400  | 0.57077500  | -0.78985700 |
| C | -3.56043400 | 4.59894900  | 4.58055000  | H | 6.45325600  | -0.27535800 | -0.34838500 |
| H | -3.59793300 | 5.66398000  | 4.84288900  | H | 6.86944300  | 0.51971400  | -1.87737700 |
| H | -4.14529700 | 4.04911800  | 5.33890100  | H | 8.05733600  | 0.44081900  | -0.56083000 |
| H | -2.51930600 | 4.26797300  | 4.65125400  | H | -0.18044800 | 3.02228900  | 5.14816700  |
| C | -5.36067800 | 4.90839500  | 2.92018400  | H | 0.31220800  | -3.82982900 | 4.47263400  |
| H | -5.52670700 | 4.88750000  | 1.83795600  | O | 1.08423800  | -1.24577300 | 4.61462400  |
| H | -6.16827700 | 4.32507000  | 3.39775200  | O | -1.12304600 | 0.52056200  | 4.85731800  |
| H | -5.45514500 | 5.94766500  | 3.25811500  | C | 1.51170000  | -2.02895600 | 5.72108200  |
| C | 6.38954100  | 3.73233700  | -2.99826500 | H | 2.17033800  | -2.84627400 | 5.40231900  |
| H | 6.68654100  | 4.58308000  | -3.62435600 | H | 2.07404400  | -1.35290900 | 6.36628000  |
| H | 7.31325900  | 3.25269600  | -2.63017800 | H | 0.65810500  | -2.43794400 | 6.27609900  |
| H | 5.86657900  | 3.01113700  | -3.63329900 | C | -0.98579500 | 0.79244000  | 6.24780000  |

|    |             |             |             |                                               |             |             |             |
|----|-------------|-------------|-------------|-----------------------------------------------|-------------|-------------|-------------|
| H  | -1.41457700 | 1.76352800  | 6.52443200  | C                                             | 2.70523400  | -2.86273300 | -4.45984700 |
| H  | -1.54151200 | 0.00671800  | 6.76264000  | C                                             | 2.64506100  | -4.20065700 | -4.85759100 |
| H  | 0.06926800  | 0.76094400  | 6.54510000  | C                                             | 1.65198000  | -5.04141900 | -4.35014000 |
| C  | -4.94466400 | 1.67849400  | 4.00130300  | C                                             | 0.72095500  | -4.54742000 | -3.43575800 |
| H  | -5.33834300 | 2.63325900  | 4.35232800  | C                                             | 0.78110600  | -3.21431500 | -3.02223000 |
| C  | -6.14418000 | 0.88015700  | 3.45857500  | H                                             | 3.46927100  | -2.20760000 | -4.86753700 |
| H  | -5.84359500 | -0.11046800 | 3.09874000  | H                                             | 3.37165500  | -4.58059300 | -5.56980800 |
| H  | -6.89397100 | 0.73473900  | 4.24461200  | H                                             | 1.60570800  | -6.07936200 | -4.66620300 |
| H  | -6.62232300 | 1.41054800  | 2.62793000  | H                                             | -0.04684300 | -5.19859700 | -3.03005400 |
| C  | -4.30878800 | 0.97444800  | 5.21167900  | H                                             | 0.07103600  | -2.82502200 | -2.29996000 |
| H  | -3.82625900 | 0.03439700  | 4.92494800  | Se                                            | 1.87216600  | -0.47313500 | -3.00425700 |
| H  | -3.54486700 | 1.60985600  | 5.66721400  | H                                             | 3.02729800  | -0.63617600 | -2.07355200 |
| H  | -5.07051000 | 0.75618100  | 5.96913200  |                                               |             |             |             |
| C  | -2.35047100 | 4.90237500  | 0.98219900  |                                               |             |             |             |
| H  | -3.11656900 | 5.55632500  | 1.40465400  | <b>27-ts</b>                                  |             |             |             |
| C  | -1.00719300 | 5.32656800  | 1.60196000  | B3LYP-D3 SCF energy: -4539.830098 a.u.        |             |             |             |
| H  | -0.19033900 | 4.70638400  | 1.21701800  | B3LYP-D3 enthalpy: -4537.923370 a.u.          |             |             |             |
| H  | -0.78789700 | 6.37377700  | 1.36158200  | B3LYP-D3 free energy: -4538.172868 a.u.       |             |             |             |
| H  | -1.02482600 | 5.21818800  | 2.69071300  | M06 SCF energy in solution: -4538.805603 a.u. |             |             |             |
| C  | -2.32273800 | 5.11771700  | -0.53522400 | Imaginary frequency: -930.49 cm <sup>-1</sup> |             |             |             |
| H  | -1.50262300 | 4.57068500  | -1.00851600 |                                               |             |             |             |
| H  | -3.26289300 | 4.80361900  | -1.00382300 | Cartesian coordinates                         |             |             |             |
| H  | -2.17176400 | 6.18007600  | -0.75913400 | ATOM X Y Z                                    |             |             |             |
| C  | 4.85967800  | -1.81018200 | 3.83710400  | C 0.06288700 -1.18487400 3.96311900           |             |             |             |
| H  | 4.73707600  | -2.65001400 | 4.53076200  | C -0.27788000 -0.50010900 2.77761500          |             |             |             |
| C  | 4.60534300  | -0.50482800 | 4.60947000  | C -0.98802700 -1.19500600 1.77865600          |             |             |             |
| H  | 4.90826700  | 0.37292400  | 4.02473600  | C -1.37313900 -2.52687500 1.98736500          |             |             |             |
| H  | 3.55144600  | -0.37781500 | 4.87290300  | C -1.05854700 -3.16869800 3.18263200          |             |             |             |
| H  | 5.19958500  | -0.49720800 | 5.52951900  | C -0.33377000 -2.50907900 4.16974100          |             |             |             |
| C  | 6.32117200  | -1.83638600 | 3.34254400  | C 0.04909100 0.95711200 2.70226000            |             |             |             |
| H  | 6.49211000  | -1.03915400 | 2.60857600  | C 0.96314700 1.52124900 1.78779300            |             |             |             |
| H  | 7.01100200  | -1.67574000 | 4.17932300  | C -0.57600100 1.80944800 3.64711000           |             |             |             |
| H  | 6.56831900  | -2.79212900 | 2.87681700  | C 1.26319700 2.89227400 1.85329300            |             |             |             |
| C  | 2.66605600  | -4.86597700 | 0.33278600  | C -0.29405200 3.17742900 3.67910500           |             |             |             |
| H  | 3.08999000  | -5.62948100 | 0.98676100  | C 0.63897900 3.70524100 2.79156900            |             |             |             |
| C  | 1.17117700  | -5.20527600 | 0.18322700  | P -1.47536200 -0.33000500 0.22022300          |             |             |             |
| H  | 0.65926400  | -4.51439800 | -0.49350300 | P 1.69161700 0.49209200 0.43023900            |             |             |             |
| H  | 1.05334500  | -6.21522000 | -0.22644300 | C -2.50818800 1.03785400 0.86083100           |             |             |             |
| H  | 0.66099100  | -5.15867800 | 1.14991600  | C -2.43982700 2.32965400 0.34428500           |             |             |             |
| C  | 3.40465700  | -4.94634300 | -1.01767500 | C -3.38007300 0.76708200 1.92467900           |             |             |             |
| H  | 3.03890400  | -4.18476900 | -1.71262800 | C -3.21981600 3.36436400 0.88261500           |             |             |             |
| H  | 4.48101800  | -4.79382300 | -0.88544800 | C -4.20985100 1.75396500 2.45219700           |             |             |             |
| H  | 3.25278100  | -5.92559800 | -1.48579400 | C -4.12654500 3.06872800 1.92504000           |             |             |             |
| Rh | -0.15375500 | -0.15770400 | -1.29312300 | C -2.60193800 -1.52520700 -0.58809600         |             |             |             |
| C  | -0.17864200 | 2.94782000  | -5.28018500 | C -3.97892900 -1.49433900 -0.38328800         |             |             |             |
| C  | -0.49886300 | 1.76602700  | -4.62346600 | C -2.04565800 -2.56154300 -1.35120200         |             |             |             |
| C  | -1.40955500 | 1.75599000  | -3.54886500 | C -4.81589900 -2.49085200 -0.90152900         |             |             |             |
| C  | -2.01101300 | 2.97047900  | -3.17794700 | C -2.84806500 -3.56698900 -1.89474200         |             |             |             |
| C  | -1.70054800 | 4.16421900  | -3.82407900 | C -4.25059000 -3.52241200 -1.68013400         |             |             |             |
| C  | -0.77157600 | 4.13523300  | -4.85711400 | C 2.38558800 -0.97655900 1.27239000           |             |             |             |
| H  | 0.52653400  | 2.96910200  | -6.10356000 | C 2.16430200 -2.27408400 0.79766700           |             |             |             |
| H  | -0.04202900 | 0.84380900  | -4.96397800 | C 3.17156500 -0.78371300 2.41374200           |             |             |             |
| H  | -2.73095700 | 2.97420000  | -2.36621100 | C 2.68481700 -3.38362600 1.47721600           |             |             |             |
| H  | -2.14735000 | 5.10642200  | -3.52732300 | C 3.74135300 -1.86243500 3.09501000           |             |             |             |
| F  | -0.41878400 | 5.28652100  | -5.45701500 | C 3.45479300 -3.17315200 2.64856200           |             |             |             |
| C  | -1.82178500 | 0.53061400  | -2.85024400 | C 3.15144900 1.42574700 -0.18998500           |             |             |             |
| H  | -2.69160900 | 0.64920100  | -2.20869900 | C 4.44398900 0.89737400 -0.14535400           |             |             |             |
| C  | -1.42319800 | -0.75409300 | -3.15449800 | C 2.95237100 2.64132900 -0.86133800           |             |             |             |
| H  | -2.01998300 | -1.59176300 | -2.82436200 | C 5.52491400 1.55005000 -0.75581200           |             |             |             |
| H  | -0.76685500 | -0.95883600 | -3.99416300 | C 4.01024100 3.35526000 -1.42475100           |             |             |             |
| C  | 1.77454500  | -2.37964000 | -3.53686500 | C 5.31689200 2.80407300 -1.37320300           |             |             |             |

|   |             |             |             |   |             |             |             |
|---|-------------|-------------|-------------|---|-------------|-------------|-------------|
| H | -1.37422900 | -4.19528100 | 3.34107100  | H | 2.90970600  | 5.42840400  | -3.99061500 |
| H | 1.99925200  | 3.33018000  | 1.19500300  | H | 3.65201500  | 3.82540200  | -4.12489800 |
| H | 0.88099700  | 4.76318000  | 2.83242300  | C | 2.90162700  | 5.63460500  | -1.22497400 |
| H | -1.76334400 | 2.54184400  | -0.47532200 | H | 1.89273600  | 5.24645700  | -1.03472700 |
| H | -3.40185400 | -0.22994600 | 2.34635800  | H | 3.38433300  | 5.79793200  | -0.25492200 |
| H | -4.41879000 | -0.69477700 | 0.19968200  | H | 2.78941200  | 6.60798500  | -1.71577300 |
| H | -0.97238100 | -2.57823600 | -1.51443000 | C | -2.23504700 | -4.67185300 | -2.74701800 |
| H | 1.54778000  | -2.41753400 | -0.08563500 | H | -2.83165100 | -5.57531700 | -2.58808800 |
| H | 3.34535700  | 0.22512300  | 2.77707600  | C | -0.77998900 | -4.99502600 | -2.37576900 |
| H | 4.61789400  | -0.05064200 | 0.35018700  | H | -0.10326300 | -4.16233800 | -2.59097000 |
| H | 1.94709400  | 3.04275900  | -0.94488500 | H | -0.68210500 | -5.24371600 | -1.31301800 |
| N | 6.37194600  | 3.56185700  | -1.97026600 | H | -0.42547900 | -5.85128500 | -2.96020800 |
| C | 7.45659400  | 4.03509900  | -1.12300900 | C | -2.36276100 | -4.30242000 | -4.23850400 |
| H | 7.06038400  | 4.29434600  | -0.13698900 | H | -1.86800200 | -5.05108200 | -4.86898000 |
| H | 8.28042600  | 3.31482400  | -0.98376500 | H | -3.41333000 | -4.24452200 | -4.53473600 |
| H | 7.88477300  | 4.94354000  | -1.56540400 | H | -1.89937600 | -3.32935300 | -4.43169500 |
| C | 6.74831100  | 3.21466500  | -3.33221700 | C | -6.29883800 | -2.42340500 | -0.55125600 |
| H | 5.85006900  | 3.00830800  | -3.92141300 | H | -6.80344000 | -3.27510500 | -1.00825900 |
| H | 7.27022600  | 4.06189400  | -3.79339200 | C | -6.50737700 | -2.54494200 | 0.97137700  |
| H | 7.41019100  | 2.33245800  | -3.40212000 | H | -6.04551100 | -1.70799400 | 1.50793200  |
| N | 3.89753900  | -4.33565000 | 3.35779100  | H | -7.57653200 | -2.54495400 | 1.21228400  |
| N | -5.03089500 | -4.56132300 | -2.28631400 | H | -6.06902700 | -3.47217500 | 1.35717500  |
| N | -4.99381800 | 4.05299500  | 2.50857700  | C | -6.95630700 | -1.14468200 | -1.10262000 |
| C | 3.36404200  | -4.55300000 | 4.69271300  | H | -6.51874200 | -0.24458400 | -0.65452500 |
| H | 3.40888300  | -5.62394400 | 4.92815300  | H | -6.83104000 | -1.07248600 | -2.18846000 |
| H | 3.89257900  | -4.01339600 | 5.49797100  | H | -8.02932900 | -1.13980200 | -0.87966500 |
| H | 2.31376400  | -4.24471400 | 4.71106900  | H | -0.08330000 | -3.01743900 | 5.09391300  |
| C | 5.26433100  | -4.77663100 | 3.13070700  | H | -0.78382200 | 3.82856900  | 4.39218800  |
| H | 5.48779400  | -4.73099100 | 2.05958600  | O | -1.44958800 | 1.21332800  | 4.50377200  |
| H | 6.02900000  | -4.18207200 | 3.66215300  | O | 0.78599100  | -0.48098700 | 4.87881200  |
| H | 5.36761500  | -5.81941100 | 3.45460600  | C | -2.00236700 | 1.98685900  | 5.56090300  |
| C | -5.98761800 | -4.18246500 | -3.31685800 | H | -2.66840900 | 2.76807700  | 5.17615800  |
| H | -6.16212300 | -5.04168600 | -3.97696900 | H | -2.58448000 | 1.29146000  | 6.16647200  |
| H | -6.96964900 | -3.85118600 | -2.93755200 | H | -1.21686800 | 2.44074600  | 6.17804600  |
| H | -5.56952100 | -3.37077700 | -3.91917000 | C | 0.55224500  | -0.75547700 | 6.25640100  |
| C | -5.45224200 | -5.64639400 | -1.41296200 | H | 0.98536600  | -1.71409300 | 6.56697500  |
| H | -6.29654800 | -5.39011600 | -0.74777800 | H | 1.04622600  | 0.04556000  | 6.80916300  |
| H | -5.75636800 | -6.50519900 | -2.02359400 | H | -0.52256400 | -0.75189700 | 6.47301700  |
| H | -4.61084800 | -5.95739600 | -0.78491900 | C | 4.67376000  | -1.58042200 | 4.27001000  |
| C | -4.40044000 | 4.93867300  | 3.49591600  | H | 5.08384000  | -2.53025700 | 4.61575500  |
| H | -3.76428100 | 5.73513300  | 3.06823100  | C | 5.87090300  | -0.71894100 | 3.82740300  |
| H | -5.19646200 | 5.42156700  | 4.07578400  | H | 5.55350000  | 0.27297900  | 3.48568800  |
| H | -3.78418600 | 4.35637600  | 4.18863100  | H | 6.56745900  | -0.57530700 | 4.66113800  |
| C | -6.01002000 | 4.66830400  | 1.66502600  | H | 6.41646900  | -1.20036400 | 3.00841100  |
| H | -6.37420100 | 3.93399600  | 0.94121900  | C | 3.93562500  | -0.94052400 | 5.45771700  |
| H | -6.85687000 | 4.97842200  | 2.29104800  | H | 3.43883100  | -0.00870400 | 5.16884500  |
| H | -5.66824800 | 5.55472400  | 1.10506100  | H | 3.16730400  | -1.61672500 | 5.84217100  |
| C | 6.88542600  | 0.86092100  | -0.74359400 | H | 4.63812600  | -0.72182400 | 6.27017900  |
| H | 7.54651400  | 1.40401200  | -1.42107500 | C | 2.39523000  | -4.80261200 | 0.99763600  |
| C | 6.79924900  | -0.58429900 | -1.27246700 | H | 3.08967300  | -5.46023400 | 1.52483800  |
| H | 6.21774000  | -1.23023400 | -0.60389900 | C | 0.97335500  | -5.23703800 | 1.39314100  |
| H | 6.33381400  | -0.61592700 | -2.26427800 | H | 0.22239500  | -4.59223400 | 0.92349300  |
| H | 7.80303700  | -1.01609200 | -1.35261300 | H | 0.78668200  | -6.27025600 | 1.07700500  |
| C | 7.51445700  | 0.89645400  | 0.66126300  | H | 0.83270600  | -5.17649200 | 2.47662600  |
| H | 8.50306000  | 0.42329500  | 0.65477000  | C | 2.61043800  | -4.98350600 | -0.50955500 |
| H | 7.62977100  | 1.92400100  | 1.02127100  | H | 1.87799400  | -4.42210700 | -1.09539000 |
| H | 6.88746000  | 0.35891600  | 1.37979600  | H | 3.61207100  | -4.65742700 | -0.81376900 |
| C | 3.73194800  | 4.68660900  | -2.10898100 | H | 2.50030500  | -6.03935100 | -0.78250800 |
| H | 4.70469800  | 5.15285800  | -2.28771700 | C | -5.21064700 | 1.40915500  | 3.55190100  |
| C | 3.05151400  | 4.47148100  | -3.47532600 | H | -5.21263900 | 2.24043800  | 4.26611300  |
| H | 2.06341600  | 4.01090300  | -3.36343500 | C | -4.87036400 | 0.11800200  | 4.31578900  |



|    |             |             |             |   |             |             |             |
|----|-------------|-------------|-------------|---|-------------|-------------|-------------|
| H  | -5.05348200 | -0.77295300 | 3.70207600  | C | 0.72456600  | -4.82143100 | -0.86233200 |
| H  | -3.82400300 | 0.08871500  | 4.63407500  | C | 0.15609300  | -1.43562500 | -2.45152900 |
| H  | -5.50889600 | 0.03233500  | 5.20165000  | C | -0.94638400 | -0.57644400 | -2.25218900 |
| C  | -6.63621700 | 1.30394900  | 2.97121300  | C | 0.82980200  | -1.39687300 | -3.69500800 |
| H  | -6.68445400 | 0.51338000  | 2.21229400  | C | -1.35375700 | 0.29447300  | -3.27686100 |
| H  | -7.35445400 | 1.05561600  | 3.76147300  | C | 0.44464400  | -0.49195100 | -4.68959300 |
| H  | -6.94859400 | 2.24279400  | 2.51001500  | C | -0.65206700 | 0.33892800  | -4.47649000 |
| C  | -3.07097200 | 4.76900700  | 0.30632400  | P | 1.63643900  | -0.38293900 | 0.17506000  |
| H  | -3.62298300 | 5.45945400  | 0.94554100  | P | -1.71889900 | -0.45508100 | -0.57959000 |
| C  | -1.60692100 | 5.24566700  | 0.31955500  | C | 2.71705700  | 0.08000500  | -1.22390900 |
| H  | -0.96737300 | 4.62066300  | -0.31022600 | C | 2.68811200  | 1.33853200  | -1.81358500 |
| H  | -1.54177700 | 6.27186500  | -0.06024400 | C | 3.64212200  | -0.87034000 | -1.68296200 |
| H  | -1.19944400 | 5.22313500  | 1.33500900  | C | 3.56234500  | 1.67301300  | -2.85663100 |
| C  | -3.68537700 | 4.85055700  | -1.10421300 | C | 4.58168600  | -0.55127300 | -2.66227900 |
| H  | -3.18551900 | 4.16680400  | -1.79468400 | C | 4.54730700  | 0.74098100  | -3.24995900 |
| H  | -4.74901600 | 4.59008700  | -1.08282900 | C | 2.73026200  | -0.50961600 | 1.64945300  |
| H  | -3.58891800 | 5.86412700  | -1.50938800 | C | 4.11918400  | -0.55861200 | 1.51989100  |
| Rh | 0.20248900  | 0.25442700  | -1.31695900 | C | 2.17883200  | -0.57247600 | 2.93348700  |
| C  | 0.79241300  | -3.07912300 | -5.07466500 | C | 4.95751400  | -0.66689100 | 2.63538800  |
| C  | 0.84201200  | -1.90076900 | -4.34256000 | C | 2.97796800  | -0.67961100 | 4.07226300  |
| C  | 1.80940000  | -1.72151200 | -3.32939700 | C | 4.38555500  | -0.73556500 | 3.92611300  |
| C  | 2.70101700  | -2.77571100 | -3.05671500 | C | -2.12387900 | -2.14439000 | -0.02892300 |
| C  | 2.65535800  | -3.96439400 | -3.77807300 | C | -1.94287500 | -2.49331100 | 1.30828500  |
| C  | 1.69831100  | -4.09668200 | -4.77818000 | C | -2.77639700 | -3.03584100 | -0.88787000 |
| H  | 0.05854500  | -3.23384600 | -5.85664800 | C | -2.39941200 | -3.71403200 | 1.80996500  |
| H  | 0.12062600  | -1.11806000 | -4.55548100 | C | -3.26631300 | -4.26002400 | -0.42163500 |
| H  | 3.44438300  | -2.65356000 | -2.27453400 | C | -3.06006500 | -4.60943500 | 0.93700100  |
| H  | 3.33364400  | -4.78445300 | -3.57130500 | C | -3.37302900 | 0.33481700  | -0.74449700 |
| F  | 1.62906100  | -5.24511100 | -5.46849800 | C | -4.47945200 | -0.29795000 | -0.17002600 |
| C  | 2.00333900  | -0.44803400 | -2.63906900 | C | -3.54471500 | 1.63035600  | -1.25872800 |
| H  | 2.83721100  | -0.41938400 | -1.94590200 | C | -5.73455500 | 0.31642700  | -0.10979400 |
| C  | 1.53007600  | 0.78657100  | -3.14512700 | C | -4.80977700 | 2.22234700  | -1.33626600 |
| H  | 2.01581800  | 1.69785200  | -2.82127900 | C | -5.92218300 | 1.55860100  | -0.75366100 |
| H  | 1.19716800  | 0.81844500  | -4.18365600 | H | 2.05204700  | -2.91554600 | 1.61253500  |
| C  | -1.66279200 | 2.66479600  | -3.50054800 | H | 1.58878000  | -5.27090400 | 1.05323900  |
| C  | -2.53915900 | 3.21218700  | -4.44582200 | H | -2.23065500 | 0.91472600  | -3.15818500 |
| C  | -2.46911600 | 4.57129300  | -4.75685800 | H | -0.96671500 | 1.02178100  | -5.26025700 |
| C  | -1.52269300 | 5.39246400  | -4.13927300 | H | 1.97941600  | 2.07785000  | -1.47384000 |
| C  | -0.64874300 | 4.84533800  | -3.20027700 | H | 3.63681000  | -1.86330000 | -1.25202400 |
| C  | -0.71981800 | 3.48810500  | -2.87509800 | H | 4.57076600  | -0.49016100 | 0.53902000  |
| H  | -3.27432900 | 2.58323700  | -4.93982800 | H | 1.10373700  | -0.51485600 | 3.06137700  |
| H  | -3.15637000 | 4.98649600  | -5.48876100 | H | -1.42385100 | -1.81059900 | 1.97171800  |
| H  | -1.47058900 | 6.44878800  | -4.38546900 | H | -2.91341700 | -2.76708000 | -1.93098200 |
| H  | 0.08512600  | 5.47434400  | -2.70508600 | H | -4.36504900 | -1.27325300 | 0.28427700  |
| H  | -0.05310900 | 3.07433300  | -2.12455700 | H | -2.68928200 | 2.19169200  | -1.61576000 |
| Se | -1.84383400 | 0.75016300  | -3.07650100 | N | -7.19763500 | 2.19257100  | -0.85052200 |
| H  | 0.00491800  | 0.80999500  | -2.98024800 | C | -8.28291800 | 1.48191100  | -1.51065000 |

## 28

B3LYP-D3 SCF energy: -4539.851772 a.u.

B3LYP-D3 enthalpy: -4537.942739 a.u.

B3LYP-D3 free energy: -4538.197600 a.u.

M06 SCF energy in solution: -4538.817284 a.u.

### Cartesian coordinates

| ATOM | X          | Y           | Z           |   |             |             |             |
|------|------------|-------------|-------------|---|-------------|-------------|-------------|
| C    | 0.36446100 | -3.80852200 | -1.75521900 | N | -3.49077400 | -5.85724300 | 1.49007400  |
| C    | 0.58945800 | -2.45234200 | -1.44370100 | N | 5.16602200  | -0.84466600 | 5.12192100  |
| C    | 1.21686800 | -2.13569800 | -0.22219800 | N | 5.55867400  | 1.03964200  | -4.22399900 |
| C    | 1.56756500 | -3.15527100 | 0.67418300  | C | -2.85080700 | -7.07382500 | 1.01614400  |
| C    | 1.31514500 | -4.48734500 | 0.35300800  | H | -2.92266400 | -7.84485000 | 1.79375200  |
|      |            |             |             | H | -3.28131900 | -7.49408400 | 0.09080100  |
|      |            |             |             | H | -1.78992100 | -6.87346600 | 0.83547300  |

|   |             |             |             |    |             |             |             |
|---|-------------|-------------|-------------|----|-------------|-------------|-------------|
| C | -4.89542900 | -5.96750100 | 1.85024800  | H  | 0.97788700  | -0.44102700 | -5.63037600 |
| H | -5.21235600 | -5.05220400 | 2.36111000  | O  | 1.85018700  | -2.28181300 | -3.84572000 |
| H | -5.57359900 | -6.13003700 | 0.99312200  | O  | -0.24061100 | -4.05909400 | -2.95157100 |
| H | -5.02691400 | -6.80659800 | 2.54408300  | C  | 2.55614000  | -2.29415400 | -5.08069500 |
| C | 5.81138500  | 0.37167700  | 5.59293700  | H  | 3.06470500  | -1.33839100 | -5.24985400 |
| H | 6.08447800  | 0.25011500  | 6.64817500  | H  | 3.30081300  | -3.08499300 | -4.99197000 |
| H | 6.72621200  | 0.64608000  | 5.03763000  | H  | 1.88754800  | -2.51482400 | -5.92214200 |
| H | 5.10900900  | 1.20787700  | 5.51786700  | C  | 0.17842600  | -5.21929000 | -3.66809200 |
| C | 5.89869900  | -2.08167400 | 5.34457500  | H  | -0.22652600 | -6.13981500 | -3.23268300 |
| H | 6.86456700  | -2.15056000 | 4.81471500  | H  | -0.21815100 | -5.10503900 | -4.67871100 |
| H | 6.10198500  | -2.18897100 | 6.41738700  | H  | 1.27273200  | -5.27479100 | -3.70241400 |
| H | 5.28038700  | -2.92899900 | 5.03206900  | C  | -4.00314800 | -5.17753400 | -1.39343300 |
| C | 5.17297300  | 0.95378600  | -5.62297500 | H  | -4.44778000 | -5.99238300 | -0.82015300 |
| H | 4.52349400  | 1.77836800  | -5.96784100 | C  | -5.15867600 | -4.45849000 | -2.11336700 |
| H | 6.07524700  | 0.95503000  | -6.24599100 | H  | -4.79959700 | -3.64173700 | -2.74963100 |
| H | 4.64557300  | 0.01135800  | -5.80394500 | H  | -5.69768400 | -5.16363400 | -2.75605300 |
| C | 6.49715100  | 2.11034400  | -3.90824500 | H  | -5.87215100 | -4.03781100 | -1.39780600 |
| H | 6.72234600  | 2.08953800  | -2.83819500 | C  | -3.02796100 | -5.79795900 | -2.40977500 |
| H | 7.43208700  | 1.93919700  | -4.45683200 | H  | -2.55337900 | -5.01933600 | -3.01423100 |
| H | 6.14447600  | 3.12450400  | -4.15966400 | H  | -2.23418700 | -6.35509800 | -1.89984800 |
| C | -6.82538000 | -0.37554800 | 0.70129800  | H  | -3.55515300 | -6.48745500 | -3.07912000 |
| H | -7.70064500 | 0.27546200  | 0.72580300  | C  | -2.14217900 | -4.05400800 | 3.27108400  |
| C | -6.37625500 | -0.57271900 | 2.16400000  | H  | -2.72335900 | -4.95134300 | 3.49802600  |
| H | -5.52725400 | -1.26348000 | 2.23655900  | C  | -0.65470600 | -4.39289000 | 3.48591300  |
| H | -6.07493100 | 0.37842800  | 2.61691900  | H  | -0.01428400 | -3.54062600 | 3.22994000  |
| H | -7.19614400 | -0.99074700 | 2.75901600  | H  | -0.46481400 | -4.65660400 | 4.53273100  |
| C | -7.24651500 | -1.71580400 | 0.07274000  | H  | -0.35149000 | -5.23660200 | 2.85652400  |
| H | -8.06365000 | -2.16995000 | 0.64452400  | C  | -2.59613600 | -2.93098500 | 4.22092300  |
| H | -7.58228300 | -1.58505800 | -0.96150600 | H  | -1.99645400 | -2.02014000 | 4.09656000  |
| H | -6.40886900 | -2.42290400 | 0.06791400  | H  | -3.64666800 | -2.66624700 | 4.05327400  |
| C | -4.98653800 | 3.54206900  | -2.07866200 | H  | -2.48640200 | -3.24877800 | 5.26367400  |
| H | -6.06498600 | 3.70553500  | -2.15294400 | C  | 5.64721700  | -1.56866900 | -3.06414000 |
| C | -4.37999500 | 4.73422600  | -1.31806300 | H  | 5.76353100  | -1.50842700 | -4.15244700 |
| H | -3.29438200 | 4.63531000  | -1.21320700 | C  | 5.28624700  | -3.01879600 | -2.69843600 |
| H | -4.57808500 | 5.66876800  | -1.85607100 | H  | 5.35491800  | -3.18913200 | -1.61659600 |
| H | -4.81170200 | 4.82807600  | -0.31522400 | H  | 4.27163700  | -3.28828600 | -3.00898900 |
| C | -4.42472000 | 3.46264100  | -3.51036900 | H  | 5.99113500  | -3.70776500 | -3.17586600 |
| H | -3.33474900 | 3.33652600  | -3.51518400 | C  | 7.01116600  | -1.20720900 | -2.44039000 |
| H | -4.86163700 | 2.62255200  | -4.06125600 | H  | 6.94792700  | -1.21539200 | -1.34582200 |
| H | -4.64955500 | 4.38419900  | -4.05908100 | H  | 7.77300600  | -1.93732900 | -2.73796500 |
| C | 2.30760500  | -0.68955000 | 5.43873400  | H  | 7.34454000  | -0.21814700 | -2.75929100 |
| H | 3.09630600  | -0.86441700 | 6.17542500  | C  | 3.37010100  | 3.02309800  | -3.53994700 |
| C | 1.26979300  | -1.81847300 | 5.56764600  | H  | 4.14328700  | 3.14167800  | -4.29951500 |
| H | 0.42210300  | -1.67328000 | 4.88652100  | C  | 2.01451600  | 3.06129100  | -4.27346400 |
| H | 1.71223000  | -2.79532100 | 5.34303000  | H  | 1.18077200  | 2.96645400  | -3.57055300 |
| H | 0.86717900  | -1.85234500 | 6.58645300  | H  | 1.89695800  | 4.01092300  | -4.80848300 |
| C | 1.66834200  | 0.68144200  | 5.73549600  | H  | 1.93549300  | 2.24290000  | -4.99776600 |
| H | 1.22216000  | 0.69169700  | 6.73668500  | C  | 3.50395300  | 4.20027000  | -2.55582700 |
| H | 2.41043900  | 1.48555500  | 5.68168900  | H  | 2.71908100  | 4.18331000  | -1.79245600 |
| H | 0.87728400  | 0.91370500  | 5.00987400  | H  | 4.47231300  | 4.17769800  | -2.04411500 |
| C | 6.46240400  | -0.71638400 | 2.39088700  | H  | 3.42175100  | 5.15265900  | -3.09193100 |
| H | 6.97061200  | -0.65600100 | 3.35445900  | Rh | -0.24761400 | 0.85768900  | 0.71068000  |
| C | 6.85922800  | -2.05526700 | 1.73844900  | C  | 0.70982800  | 3.78649700  | 0.23205800  |
| H | 6.36793500  | -2.17744100 | 0.76557000  | C  | 0.83387400  | 5.17898900  | 0.34655200  |
| H | 7.94221000  | -2.10176700 | 1.57642200  | C  | 0.23065100  | 6.02146900  | -0.58532700 |
| H | 6.56979200  | -2.90452100 | 2.36694900  | C  | -0.52001700 | 5.49726300  | -1.64396200 |
| C | 6.95281700  | 0.47780300  | 1.54994600  | C  | -0.65394100 | 4.11549600  | -1.76839400 |
| H | 6.54621000  | 0.45678600  | 0.53224500  | C  | -0.03608800 | 3.26852600  | -0.84401100 |
| H | 6.66083400  | 1.42924600  | 2.00737800  | H  | 1.39185700  | 5.59998400  | 1.17633000  |
| H | 8.04539700  | 0.45619000  | 1.46765000  | H  | 0.33709800  | 7.09748500  | -0.47786600 |
| H | 0.53454900  | -5.85934000 | -1.11193800 | H  | -0.98411700 | 6.15889000  | -2.36904400 |

|    |             |             |             |   |             |             |             |
|----|-------------|-------------|-------------|---|-------------|-------------|-------------|
| H  | -1.19930800 | 3.69034200  | -2.60605400 | C | -3.78492000 | -3.55110000 | 2.32296000  |
| H  | -0.06703000 | 2.19076000  | -1.05223000 | C | -3.35067500 | 0.76358800  | -0.86544200 |
| Se | 1.53897700  | 2.57567700  | 1.51036200  | C | -4.65323900 | 0.45844300  | -0.46219800 |
| C  | -2.43864700 | 5.78671600  | 1.51579900  | C | -3.13579300 | 1.94871700  | -1.58543200 |
| C  | -2.42465400 | 4.40486600  | 1.62970600  | C | -5.73273100 | 1.30221000  | -0.75562600 |
| C  | -1.60469200 | 3.76340500  | 2.57748300  | C | -4.19249600 | 2.78603400  | -1.94831600 |
| C  | -0.79040200 | 4.55311100  | 3.40942100  | C | -5.50777100 | 2.46387400  | -1.52729100 |
| C  | -0.79657900 | 5.94232000  | 3.31060600  | H | 1.50641500  | -3.13072900 | 2.24686000  |
| C  | -1.61814200 | 6.53510200  | 2.35870600  | H | 0.47165000  | -5.37716600 | 2.31901600  |
| H  | -3.05309400 | 6.29266400  | 0.78013100  | H | -2.21130900 | 0.43996300  | -3.22186600 |
| H  | -3.04836400 | 3.81700000  | 0.96708200  | H | -1.05844800 | -0.26617000 | -5.27304500 |
| H  | -0.14221500 | 4.07027900  | 4.13405900  | H | 2.26563100  | 0.75091600  | -2.02971200 |
| H  | -0.17446700 | 6.56470400  | 3.94450100  | H | 3.08113500  | -3.19792500 | -0.59724300 |
| F  | -1.61263400 | 7.87373200  | 2.23285000  | H | 4.32455000  | -0.62372000 | 0.45898000  |
| C  | -1.58605100 | 2.31338900  | 2.73908900  | H | 0.95204400  | -0.75618300 | 3.10351600  |
| H  | -0.92260700 | 1.94255400  | 3.51714400  | H | -1.73374600 | -0.83907100 | 2.43106500  |
| C  | -2.37411200 | 1.41327600  | 2.08466700  | H | -3.67897800 | -2.60949400 | -0.95205900 |
| H  | -3.12943900 | 1.72840200  | 1.37652100  | H | -4.83904900 | -0.44189500 | 0.10955600  |
| H  | -2.45543600 | 0.39142700  | 2.43850800  | H | -2.12784800 | 2.22601500  | -1.87950300 |
| H  | -0.29284800 | -0.19358100 | 1.80759700  | N | -6.55221800 | 3.36743900  | -1.89918300 |

### 29-ts-R

B3LYP-D3 SCF energy: -4539.839082 a.u.

B3LYP-D3 enthalpy: -4537.932147 a.u.

B3LYP-D3 free energy: -4538.184385 a.u.

M06 SCF energy in solution: -4538.805113 a.u.

Imaginary frequency: -121.95 cm<sup>-1</sup>

### Cartesian coordinates

| ATOM | X           | Y           | Z           |   |             |             |             |
|------|-------------|-------------|-------------|---|-------------|-------------|-------------|
| C    | -0.72544600 | -4.33456500 | -0.68412200 | N | 4.91939000  | 0.70125200  | 4.85770400  |
| C    | -0.18957900 | -3.03348400 | -0.72178800 | N | 5.59406600  | -1.70796800 | -4.12367900 |
| C    | 0.62972900  | -2.61084600 | 0.34276500  | C | -3.87938900 | -5.93328000 | 2.98639100  |
| C    | 0.86449900  | -3.45522600 | 1.43568500  | H | -3.88040700 | -6.47604200 | 3.94052800  |
| C    | 0.29312800  | -4.72645500 | 1.46797100  | H | -4.53238900 | -6.48677700 | 2.28983000  |
| C    | -0.49250200 | -5.17531200 | 0.40858000  | H | -2.86169300 | -5.95335800 | 2.58441300  |
| C    | -0.45138400 | -2.20460300 | -1.94223200 | C | -5.60213400 | -4.35820600 | 3.77604500  |
| C    | -1.30387800 | -1.07800100 | -1.97019900 | H | -5.73044300 | -3.30882800 | 4.06069600  |
| C    | 0.16930800  | -2.61225500 | -3.14828000 | H | -6.42100000 | -4.62409500 | 3.08333200  |
| C    | -1.52565800 | -0.39565900 | -3.18017100 | H | -5.71468300 | -4.97223100 | 4.67795500  |
| C    | -0.02800700 | -1.90016600 | -4.33581100 | C | 5.37588100  | 2.07918300  | 4.75860000  |
| C    | -0.88488600 | -0.80300200 | -4.34471300 | H | 5.55590800  | 2.47140200  | 5.76757500  |
| P    | 1.42194200  | -0.96132500 | 0.20914400  | H | 6.30324600  | 2.21944200  | 4.17661200  |
| P    | -1.92594000 | -0.30534000 | -0.40623800 | H | 4.59223400  | 2.68545100  | 4.29324100  |
| C    | 2.57194700  | -1.19886600 | -1.19301600 | C | 5.81335800  | -0.21811400 | 5.54447000  |
| C    | 2.81748400  | -0.17688000 | -2.10295600 | H | 6.75591400  | -0.42505400 | 5.00640500  |
| C    | 3.28983400  | -2.39775900 | -1.29704000 | H | 6.07353100  | 0.19624200  | 6.52615400  |
| C    | 3.76942900  | -0.32095000 | -3.12233700 | H | 5.30054700  | -1.17207100 | 5.70403600  |
| C    | 4.27773900  | -2.56609300 | -2.26593900 | C | 5.20684900  | -2.08918700 | -5.47197900 |
| C    | 4.53245900  | -1.50733600 | -3.17879500 | H | 4.76829900  | -1.26894700 | -6.06879500 |
| C    | 2.54192300  | -0.75723400 | 1.64752500  | H | 6.08746700  | -2.46035700 | -6.00968500 |
| C    | 3.89854300  | -0.50326600 | 1.44724800  | H | 4.47496300  | -2.90307500 | -5.42836000 |
| C    | 2.00919200  | -0.57395900 | 2.93009600  | C | 6.75118500  | -0.82691900 | -4.03428200 |
| C    | 4.72641400  | -0.05401500 | 2.48388000  | H | 6.96043800  | -0.61127100 | -2.98248000 |
| C    | 2.79334700  | -0.10454000 | 3.98488500  | H | 7.62502500  | -1.33865000 | -4.45714400 |
| C    | 4.16710800  | 0.17156400  | 3.75918200  | H | 6.64282000  | 0.13640500  | -4.56122000 |
| C    | -2.63109300 | -1.61748300 | 0.64625300  | C | -7.11608300 | 0.91991500  | -0.23884600 |
| C    | -2.38750900 | -1.59925600 | 2.02176900  | H | -7.76701200 | 1.79088800  | -0.34027000 |
| C    | -3.48393000 | -2.59184400 | 0.11645400  | C | -7.10227800 | 0.54652700  | 1.25575900  |
| C    | -2.94046900 | -2.55730800 | 2.87144200  | H | -6.54923100 | -0.38157700 | 1.44238800  |
| C    | -4.09768700 | -3.54115200 | 0.94354000  | H | -6.64508300 | 1.33846000  | 1.85915300  |
|      |             |             |             | H | -8.12704600 | 0.39279800  | 1.61189300  |

|   |             |             |             |    |             |             |             |
|---|-------------|-------------|-------------|----|-------------|-------------|-------------|
| C | -7.71650300 | -0.22299700 | -1.08034900 | H  | -1.55260800 | -4.50066400 | 4.22838300  |
| H | -8.71906800 | -0.48309000 | -0.72142800 | C  | -2.33475800 | -1.17566000 | 4.94009100  |
| H | -7.79285000 | 0.05247700  | -2.13676600 | H  | -1.43371100 | -0.70269100 | 4.53264300  |
| H | -7.09063500 | -1.11869400 | -1.01339300 | H  | -3.18190900 | -0.50725000 | 4.74787900  |
| C | -3.91815700 | 4.00614000  | -2.81753100 | H  | -2.19304400 | -1.24584000 | 6.02391400  |
| H | -4.87258500 | 4.52376800  | -2.94012300 | C  | 5.09810300  | -3.85182900 | -2.31396000 |
| C | -2.92243500 | 4.97872100  | -2.16392500 | H  | 5.28978400  | -4.07778900 | -3.36857200 |
| H | -1.92485500 | 4.53345000  | -2.07939900 | C  | 4.38812400  | -5.06187600 | -1.68324200 |
| H | -2.82137000 | 5.88702200  | -2.76954100 | H  | 4.34725700  | -4.98236700 | -0.59016800 |
| H | -3.25500000 | 5.27380200  | -1.16206900 | H  | 3.35944800  | -5.17380500 | -2.04153200 |
| C | -3.43555000 | 3.57829800  | -4.21642400 | H  | 4.93855900  | -5.97914100 | -1.91824200 |
| H | -2.48534100 | 3.03242500  | -4.16002500 | C  | 6.46796100  | -3.64409000 | -1.63650400 |
| H | -4.16820300 | 2.92561500  | -4.70357100 | H  | 6.33664900  | -3.39936600 | -0.57550900 |
| H | -3.27957300 | 4.45439400  | -4.85662600 | H  | 7.07059500  | -4.55779300 | -1.69975400 |
| C | 2.13605600  | 0.17211300  | 5.32953500  | H  | 7.02710400  | -2.83452000 | -2.11122100 |
| H | 2.92276500  | 0.53698200  | 5.99487000  | C  | 3.90079400  | 0.80762300  | -4.13938100 |
| C | 1.53270700  | -1.10052500 | 5.94824700  | H  | 4.69350900  | 0.55256000  | -4.84335100 |
| H | 0.73584600  | -1.51804600 | 5.32368000  | C  | 2.60229600  | 0.94507300  | -4.95883900 |
| H | 2.29656100  | -1.87567400 | 6.07613800  | H  | 1.75398600  | 1.20693000  | -4.31841100 |
| H | 1.10144800  | -0.88221600 | 6.93216500  | H  | 2.70857700  | 1.73011500  | -5.71668600 |
| C | 1.07981300  | 1.28798400  | 5.19648200  | H  | 2.35696600  | 0.00547600  | -5.46664000 |
| H | 0.63917200  | 1.52487400  | 6.17170700  | C  | 4.28643900  | 2.14276600  | -3.47412500 |
| H | 1.53023400  | 2.20292300  | 4.79205000  | H  | 3.50811200  | 2.49453200  | -2.78836200 |
| H | 0.26368800  | 0.99125500  | 4.52516400  | H  | 5.21743500  | 2.04347800  | -2.90476400 |
| C | 6.18766300  | 0.22673300  | 2.15052200  | H  | 4.43145600  | 2.91910400  | -4.23405400 |
| H | 6.71067100  | 0.48641400  | 3.07215800  | Rh | -0.10039700 | 0.89876600  | 0.37032000  |
| C | 6.88989100  | -1.01381700 | 1.56688000  | C  | 1.49466200  | 3.40430800  | -0.80527400 |
| H | 6.46029800  | -1.30441700 | 0.60140700  | C  | 1.93897900  | 4.70435700  | -1.08033300 |
| H | 7.95395100  | -0.80689500 | 1.40530000  | C  | 1.63488000  | 5.30639500  | -2.30376000 |
| H | 6.80706800  | -1.87154300 | 2.24355600  | C  | 0.87143800  | 4.62965800  | -3.25818300 |
| C | 6.30557800  | 1.42893900  | 1.19214100  | C  | 0.41501300  | 3.33718000  | -2.98893300 |
| H | 5.81569900  | 1.21843400  | 0.23361600  | C  | 0.72941700  | 2.72982200  | -1.77316000 |
| H | 5.83328000  | 2.32135700  | 1.61664900  | H  | 2.51534400  | 5.24474800  | -0.33603900 |
| H | 7.35833900  | 1.65850700  | 0.99034200  | H  | 1.99071200  | 6.31249600  | -2.50662400 |
| H | -0.92225100 | -6.17067000 | 0.43001800  | H  | 0.63526100  | 5.10301700  | -4.20641200 |
| H | 0.46724600  | -2.19878800 | -5.25098400 | H  | -0.16768600 | 2.79205200  | -3.72529000 |
| O | 0.95898200  | -3.71552800 | -3.06444900 | H  | 0.41356600  | 1.68985200  | -1.63421600 |
| O | -1.48047200 | -4.70382600 | -1.75929200 | Se | 1.86185100  | 2.54918000  | 0.90383400  |
| C | 1.68697500  | -4.11397200 | -4.21997300 | C  | -0.40112500 | 6.95037400  | 0.63718900  |
| H | 2.37835200  | -3.32455300 | -4.53744700 | C  | -0.58158800 | 5.57156900  | 0.67998200  |
| H | 2.25866900  | -4.99332100 | -3.92369300 | C  | -0.14699000 | 4.81723300  | 1.78711500  |
| H | 1.01615200  | -4.37916600 | -5.04687000 | C  | 0.49093600  | 5.49129500  | 2.85153800  |
| C | -1.38009100 | -6.05786100 | -2.19616600 | C  | 0.67624100  | 6.86578300  | 2.82347000  |
| H | -1.92493700 | -6.74415400 | -1.53795500 | C  | 0.22449400  | 7.57693800  | 1.71021200  |
| H | -1.83595500 | -6.08601800 | -3.18772400 | H  | -0.73197000 | 7.54097600  | -0.21008400 |
| H | -0.32917100 | -6.36271500 | -2.26191900 | H  | -1.06116800 | 5.07852000  | -0.15405600 |
| C | -5.10162100 | -4.51676900 | 0.33675900  | H  | 0.84549900  | 4.92053100  | 3.70599900  |
| H | -5.56535800 | -5.07394500 | 1.15203900  | H  | 1.15655000  | 7.39791000  | 3.63733100  |
| C | -6.23733600 | -3.77371400 | -0.38947700 | F  | 0.40240100  | 8.90655900  | 1.67546000  |
| H | -5.86720600 | -3.21584200 | -1.25733600 | C  | -0.33719600 | 3.37345700  | 1.87230200  |
| H | -6.98854600 | -4.48509400 | -0.75083600 | H  | -0.09780100 | 2.95096000  | 2.84709200  |
| H | -6.73483700 | -3.06521200 | 0.28174000  | C  | -1.26250900 | 2.59196400  | 1.07291000  |
| C | -4.42119900 | -5.53263800 | -0.59541500 | H  | -1.72230600 | 3.11986200  | 0.24099100  |
| H | -3.92882000 | -5.02825700 | -1.43178700 | H  | -2.02340100 | 2.10922600  | 1.69268200  |
| H | -3.65762500 | -6.10319300 | -0.05587700 | H  | -0.34946100 | 0.33855500  | 1.75835200  |
| H | -5.15662500 | -6.23888800 | -0.99762300 |    |             |             |             |
| C | -2.57386400 | -2.57427500 | 4.35040100  |    |             |             |             |
| H | -3.40803900 | -3.02864100 | 4.89184200  |    |             |             |             |
| C | -1.34573800 | -3.48048700 | 4.56605700  |    |             |             |             |
| H | -0.48594400 | -3.10751300 | 3.99765500  |    |             |             |             |
| H | -1.06927000 | -3.51611500 | 5.62621700  |    |             |             |             |

### 30-R

B3LYP-D3 SCF energy: -4539.841792 a.u.

B3LYP-D3 enthalpy: -4537.933929 a.u.

B3LYP-D3 free energy: -4538.188665 a.u.

M06 SCF energy in solution: -4538.817631 a.u.

| Cartesian coordinates |             |             |             |   |             |             |             |
|-----------------------|-------------|-------------|-------------|---|-------------|-------------|-------------|
| ATOM                  | X           | Y           | Z           |   |             |             |             |
| C                     | -1.14174600 | -4.40611900 | -0.08767400 | H | -6.84271500 | 4.76538400  | -1.00676200 |
| C                     | -0.45746400 | -3.19867800 | -0.32259000 | N | -4.82872400 | -3.80693400 | 3.53289700  |
| C                     | 0.44255500  | -2.73083600 | 0.65419200  | N | 4.88918900  | 0.95367800  | 4.70126900  |
| C                     | 0.62577600  | -3.44355400 | 1.84670000  | N | 5.24813000  | -2.53767300 | -4.13201400 |
| C                     | -0.08552400 | -4.62145800 | 2.07028700  | C | -4.62853700 | -5.24376300 | 3.42991900  |
| C                     | -0.96654700 | -5.10930800 | 1.10794500  | H | -4.71883000 | -5.69164300 | 4.42795700  |
| C                     | -0.63937200 | -2.54087900 | -1.65666700 | H | -5.34137400 | -5.76436300 | 2.76743000  |
| C                     | -1.35935000 | -1.34471400 | -1.87172800 | H | -3.61712000 | -5.43887900 | 3.05983900  |
| C                     | -0.07426700 | -3.20008100 | -2.77487500 | C | -6.12386700 | -3.38307500 | 4.04193300  |
| C                     | -1.51065200 | -0.84242200 | -3.17674400 | H | -6.10892000 | -2.30406500 | 4.22670600  |
| C                     | -0.20166700 | -2.67131100 | -4.06327600 | H | -6.96793400 | -3.59888700 | 3.36228300  |
| C                     | -0.93095800 | -1.50108300 | -4.25511700 | H | -6.32372200 | -3.88921600 | 4.99428600  |
| P                     | 1.34951300  | -1.17616500 | 0.30070200  | C | 5.26851300  | 2.33774500  | 4.46282600  |
| P                     | -1.91367600 | -0.29537400 | -0.45020500 | H | 5.48531600  | 2.82273100  | 5.42287600  |
| C                     | 2.44399600  | -1.62252900 | -1.08941200 | H | 6.15333000  | 2.46899300  | 3.81524600  |
| C                     | 2.64915700  | -0.71473500 | -2.12319800 | H | 4.43019700  | 2.86565700  | 3.99663700  |
| C                     | 3.13747700  | -2.83893300 | -1.09358000 | C | 5.84969700  | 0.14473100  | 5.43560800  |
| C                     | 3.53082400  | -0.99330100 | -3.17601000 | H | 6.79282100  | -0.05218100 | 4.89517700  |
| C                     | 4.06227000  | -3.13593200 | -2.09428400 | H | 6.10415200  | 0.65130500  | 6.37467500  |
| C                     | 4.26692800  | -2.19765100 | -3.14269900 | H | 5.39596700  | -0.82015100 | 5.68323300  |
| C                     | 2.49189700  | -0.86264200 | 1.69653400  | C | 4.74867800  | -3.11135700 | -5.37055400 |
| C                     | 3.84496700  | -0.62936800 | 1.45497600  | H | 4.26515700  | -2.38128200 | -6.04529000 |
| C                     | 1.96787900  | -0.53589500 | 2.95408800  | H | 5.57914000  | -3.57366200 | -5.91743000 |
| C                     | 4.67736900  | -0.05447600 | 2.42438900  | H | 4.01808100  | -3.89586400 | -5.14492900 |
| C                     | 2.76205200  | 0.04047900  | 3.94677200  | C | 6.41363700  | -1.67557900 | -4.27217700 |
| C                     | 4.13066700  | 0.29950700  | 3.67641800  | H | 6.70008600  | -1.29202500 | -3.28871600 |
| C                     | -2.79671300 | -1.37311100 | 0.72412400  | H | 7.25177800  | -2.26631300 | -4.66356900 |
| C                     | -2.55585600 | -1.26088200 | 2.09566200  | H | 6.27342000  | -0.81242800 | -4.94460100 |
| C                     | -3.77032700 | -2.27049200 | 0.27262700  | C | -6.88087300 | 1.65983600  | -0.73907200 |
| C                     | -3.23706300 | -2.05126900 | 3.02098600  | H | -7.38725600 | 2.59255000  | -0.99573300 |
| C                     | -4.51044700 | -3.04637500 | 1.17308500  | C | -6.98096300 | 1.50749900  | 0.79074500  |
| C                     | -4.20657400 | -2.96971600 | 2.55251000  | H | -6.58027000 | 0.54679700  | 1.13490400  |
| C                     | -3.16455200 | 0.87023300  | -1.11567100 | H | -6.43416500 | 2.30476700  | 1.30608200  |
| C                     | -4.51298500 | 0.81073700  | -0.75836900 | H | -8.03020300 | 1.55422200  | 1.10310400  |
| C                     | -2.74195200 | 1.90805800  | -1.95806900 | C | -7.61602000 | 0.50795000  | -1.45127800 |
| C                     | -5.43607400 | 1.76038100  | -1.21803500 | H | -8.66102400 | 0.45487700  | -1.12467300 |
| C                     | -3.63611200 | 2.84121800  | -2.48059200 | H | -7.60395800 | 0.63508900  | -2.53839100 |
| C                     | -5.00252200 | 2.77018900  | -2.10733500 | H | -7.14152800 | -0.45186100 | -1.22120500 |
| H                     | 1.33037300  | -3.09030900 | 2.59096300  | C | -3.12261600 | 3.90703800  | -3.43919900 |
| H                     | 0.05328100  | -5.16791500 | 2.99848000  | H | -3.99377100 | 4.48211800  | -3.76340700 |
| H                     | -2.09503400 | 0.04955600  | -3.35848200 | C | -2.14044000 | 4.86785000  | -2.74494500 |
| H                     | -1.05021700 | -1.10167900 | -5.25816400 | H | -1.21975800 | 4.34898500  | -2.45387400 |
| H                     | 2.10965000  | 0.22631200  | -2.11937300 | H | -1.85568100 | 5.68274800  | -3.42083800 |
| H                     | 2.96060300  | -3.54654200 | -0.29175600 | H | -2.58047700 | 5.30931700  | -1.84378800 |
| H                     | 4.26081700  | -0.86201300 | 0.48151100  | C | -2.47955400 | 3.27566700  | -4.68804500 |
| H                     | 0.91043700  | -0.69164700 | 3.15023600  | H | -1.59293600 | 2.68137900  | -4.42958600 |
| H                     | -1.80579700 | -0.56190600 | 2.44401300  | H | -3.18437200 | 2.61553000  | -5.20547100 |
| H                     | -3.96191700 | -2.36198500 | -0.79258200 | H | -2.16233800 | 4.05396000  | -5.39175900 |
| H                     | -4.85601800 | 0.02862800  | -0.09201800 | C | 2.11765400  | 0.45147800  | 5.26300600  |
| H                     | -1.69201300 | 1.99090700  | -2.22333200 | H | 2.92018200  | 0.82432300  | 5.90462900  |
| N                     | -5.87869600 | 3.76101500  | -2.65020700 | C | 1.43973200  | -0.73310900 | 5.97300700  |
| C                     | -6.98332100 | 3.34515800  | -3.49989400 | H | 0.61127700  | -1.14387100 | 5.38503700  |
| H                     | -6.67907600 | 2.47595600  | -4.09021100 | H | 2.15399200  | -1.54371300 | 6.15525300  |
| H                     | -7.91003500 | 3.08617400  | -2.96077600 | H | 1.03087700  | -0.41618700 | 6.93937900  |
| H                     | -7.22432900 | 4.15880700  | -4.19616700 | C | 1.12439200  | 1.60896500  | 5.03431900  |
| C                     | -6.12094500 | 4.93500500  | -1.82615900 | H | 0.68893600  | 1.94317000  | 5.98302300  |
| H                     | -5.17894500 | 5.27107400  | -1.38078300 | H | 1.62468500  | 2.46544700  | 4.56581600  |
| H                     | -6.50960800 | 5.74640100  | -2.45342000 | H | 0.29956400  | 1.30096800  | 4.37868700  |
|                       |             |             |             | C | 6.12733700  | 0.21729300  | 2.03891400  |
|                       |             |             |             | H | 6.64919500  | 0.62018700  | 2.90794000  |
|                       |             |             |             | C | 6.86040300  | -1.07347300 | 1.62716800  |

|    |             |             |             |
|----|-------------|-------------|-------------|
| H  | 6.42262400  | -1.51662800 | 0.72491700  |
| H  | 7.91412600  | -0.86111500 | 1.41340600  |
| H  | 6.81756200  | -1.82370600 | 2.42437100  |
| C  | 6.20295900  | 1.27865800  | 0.92246500  |
| H  | 5.72232900  | 0.92292800  | 0.00299100  |
| H  | 5.70039300  | 2.20444600  | 1.22412200  |
| H  | 7.24697200  | 1.51471500  | 0.68609900  |
| H  | -1.50944100 | -6.03180200 | 1.28180300  |
| H  | 0.24991400  | -3.16640600 | -4.91380300 |
| O  | 0.59049800  | -4.35526000 | -2.50425100 |
| O  | -1.97308100 | -4.82935500 | -1.08394200 |
| C  | 1.24268800  | -5.02781600 | -3.57408300 |
| H  | 2.02859700  | -4.39933400 | -4.01057100 |
| H  | 1.69574100  | -5.91666500 | -3.13459400 |
| H  | 0.53206500  | -5.33181200 | -4.35308800 |
| C  | -2.04184600 | -6.23300700 | -1.32580700 |
| H  | -2.62133000 | -6.75711500 | -0.55723200 |
| H  | -2.55045900 | -6.34627200 | -2.28505400 |
| H  | -1.03454600 | -6.66134200 | -1.38587600 |
| C  | -5.63991700 | -3.92192400 | 0.63857300  |
| H  | -6.18405600 | -4.32961900 | 1.49194100  |
| C  | -6.65205100 | -3.09369400 | -0.17442500 |
| H  | -6.20306900 | -2.68949600 | -1.08899400 |
| H  | -7.50229000 | -3.71721900 | -0.47309700 |
| H  | -7.03620700 | -2.25306900 | 0.41398000  |
| C  | -5.10819000 | -5.10675100 | -0.18479500 |
| H  | -4.52778800 | -4.75946600 | -1.04488900 |
| H  | -4.45261300 | -5.73811000 | 0.42356300  |
| H  | -5.93694000 | -5.72447200 | -0.54951300 |
| C  | -2.88838500 | -1.96880100 | 4.50242900  |
| H  | -3.77566200 | -2.26949000 | 5.06598200  |
| C  | -1.77579600 | -2.98278500 | 4.83230800  |
| H  | -0.86851800 | -2.76051900 | 4.25890200  |
| H  | -1.52634900 | -2.95252500 | 5.89942200  |
| H  | -2.08964100 | -4.00031900 | 4.57918700  |
| C  | -2.49308700 | -0.55630700 | 4.96122200  |
| H  | -1.53599000 | -0.23553400 | 4.53351600  |
| H  | -3.25104300 | 0.18518600  | 4.68387300  |
| H  | -2.37627700 | -0.53591600 | 6.05016400  |
| C  | 4.89059900  | -4.41522200 | -2.02490400 |
| H  | 5.02985500  | -4.77553900 | -3.04959600 |
| C  | 4.23320700  | -5.53776900 | -1.20570200 |
| H  | 4.24261400  | -5.31531600 | -0.13190500 |
| H  | 3.19178700  | -5.70730400 | -1.49772100 |
| H  | 4.78713700  | -6.47220600 | -1.34522200 |
| C  | 6.29091900  | -4.10657600 | -1.45526600 |
| H  | 6.21018000  | -3.71571400 | -0.43327000 |
| H  | 6.90220600  | -5.01603700 | -1.42189200 |
| H  | 6.81360700  | -3.36734400 | -2.06696100 |
| C  | 3.65408900  | 0.03017600  | -4.29954100 |
| H  | 4.27547800  | -0.39572600 | -5.08882200 |
| C  | 2.28444300  | 0.33728100  | -4.93535600 |
| H  | 1.59947300  | 0.80558500  | -4.22038600 |
| H  | 2.40456500  | 1.02399500  | -5.78136900 |
| H  | 1.80422700  | -0.57829800 | -5.29618700 |
| C  | 4.34281200  | 1.31619500  | -3.80166900 |
| H  | 3.76212400  | 1.79367700  | -3.00513500 |
| H  | 5.34160200  | 1.09952800  | -3.40753900 |
| H  | 4.44701600  | 2.04066800  | -4.61778400 |
| Rh | -0.02522700 | 0.82180200  | 0.25961900  |
| C  | 2.01822500  | 3.39180700  | -0.75080500 |

|    |             |            |             |
|----|-------------|------------|-------------|
| C  | 2.79054700  | 4.55392400 | -0.84404300 |
| C  | 2.88034100  | 5.23330200 | -2.06140200 |
| C  | 2.19686900  | 4.76244300 | -3.18418100 |
| C  | 1.42425700  | 3.60227300 | -3.09329300 |
| C  | 1.33834800  | 2.91769400 | -1.88034600 |
| H  | 3.31011400  | 4.93289900 | 0.03040600  |
| H  | 3.48034400  | 6.13617300 | -2.12738700 |
| H  | 2.26660800  | 5.29521300 | -4.12784800 |
| H  | 0.89197800  | 3.22771500 | -3.96238600 |
| H  | 0.73334700  | 2.01373500 | -1.82707500 |
| Se | 1.86543500  | 2.47584300 | 0.97291400  |
| C  | 0.05155400  | 7.02579000 | 0.42207200  |
| C  | -0.09980800 | 5.64111200 | 0.40554600  |
| C  | 0.11557600  | 4.87566900 | 1.56370600  |
| C  | 0.49997700  | 5.53852400 | 2.74321800  |
| C  | 0.65548400  | 6.92079400 | 2.77723400  |
| C  | 0.42711800  | 7.64497800 | 1.60944600  |
| H  | -0.11340300 | 7.62640400 | -0.46595800 |
| H  | -0.38252400 | 5.15649500 | -0.52016200 |
| H  | 0.67811000  | 4.96046300 | 3.64705500  |
| H  | 0.94276300  | 7.44366200 | 3.68313300  |
| F  | 0.57531200  | 8.98137400 | 1.63148000  |
| C  | -0.01100100 | 3.39409400 | 1.57046500  |
| H  | -0.04198400 | 3.00747500 | 2.59154200  |
| C  | -0.98071800 | 2.66876000 | 0.67500800  |
| H  | -1.14593000 | 3.18583300 | -0.27135200 |
| H  | -1.94777400 | 2.53192800 | 1.16932100  |
| H  | -0.43044900 | 0.50586800 | 1.68648300  |

### 31

B3LYP-D3 SCF energy: -4539.855762 a.u.

B3LYP-D3 enthalpy: -4537.946462 a.u.

B3LYP-D3 free energy: -4538.199028 a.u.

M06 SCF energy in solution: -4538.825775 a.u.

#### Cartesian coordinates

| ATOM | X           | Y           | Z           |  |
|------|-------------|-------------|-------------|--|
| C    | -0.33174300 | 0.26276700  | 4.14176600  |  |
| C    | 0.06560600  | -0.21255700 | 2.87322200  |  |
| C    | 0.94245100  | 0.57645500  | 2.10045200  |  |
| C    | 1.39725000  | 1.80734900  | 2.59981200  |  |
| C    | 0.99363400  | 2.25181000  | 3.85578000  |  |
| C    | 0.12969900  | 1.48598900  | 4.63190800  |  |
| C    | -0.44672000 | -1.55324800 | 2.45991100  |  |
| C    | -1.36724600 | -1.74033700 | 1.40821200  |  |
| C    | -0.04466900 | -2.67800200 | 3.22077200  |  |
| C    | -1.87650700 | -3.02397800 | 1.14655100  |  |
| C    | -0.53223600 | -3.95406800 | 2.92727100  |  |
| C    | -1.45821400 | -4.11362200 | 1.90080100  |  |
| P    | 1.52489400  | 0.00276900  | 0.44154800  |  |
| P    | -1.84355400 | -0.32673300 | 0.30575700  |  |
| C    | 2.16542600  | -1.67375900 | 0.74585400  |  |
| C    | 1.87658300  | -2.71816800 | -0.12656300 |  |
| C    | 2.96149300  | -1.91682700 | 1.87273100  |  |
| C    | 2.34324300  | -4.01598100 | 0.11119400  |  |
| C    | 3.50096500  | -3.17981900 | 2.11312300  |  |
| C    | 3.17606100  | -4.24402400 | 1.22900000  |  |
| C    | 2.96054900  | 1.08356900  | 0.08918400  |  |
| C    | 4.26717300  | 0.66051900  | 0.32534800  |  |
| C    | 2.73853100  | 2.39271800  | -0.36131900 |  |
| C    | 5.35650800  | 1.52177100  | 0.14173600  |  |

|   |             |             |             |   |             |             |             |
|---|-------------|-------------|-------------|---|-------------|-------------|-------------|
| C | 3.79687800  | 3.28113600  | -0.55333900 | H | 4.15398500  | -6.75360400 | -0.18764500 |
| C | 5.12277500  | 2.83490400  | -0.31794000 | C | -7.06263900 | -0.15654400 | -0.85277600 |
| C | -2.41942700 | 1.01095900  | 1.40929200  | H | -7.75805500 | -0.45366000 | -1.63847500 |
| C | -2.04535200 | 2.33710800  | 1.17043000  | C | -7.01875700 | 1.38264500  | -0.84759100 |
| C | -3.28181900 | 0.72513000  | 2.47306700  | H | -6.40371900 | 1.77168000  | -0.02747700 |
| C | -2.48335500 | 3.37432900  | 1.99631800  | H | -6.61212800 | 1.77109000  | -1.78799200 |
| C | -3.78183400 | 1.74266800  | 3.29415300  | H | -8.02873800 | 1.78739800  | -0.71904700 |
| C | -3.34061700 | 3.06923200  | 3.08149600  | C | -7.61519800 | -0.70015000 | 0.47910900  |
| C | -3.33543000 | -0.92455900 | -0.58251800 | H | -8.60543100 | -0.27831900 | 0.68648100  |
| C | -4.59889300 | -0.36860400 | -0.38953700 | H | -7.70620700 | -1.79131000 | 0.45509000  |
| C | -3.17995000 | -1.92400900 | -1.55604400 | H | -6.95479800 | -0.43732200 | 1.31148400  |
| C | -5.70326800 | -0.77878900 | -1.15372400 | C | -4.04099300 | -3.43914600 | -3.38937500 |
| C | -4.25306500 | -2.37079600 | -2.32492000 | H | -5.00982000 | -3.91865300 | -3.55419000 |
| C | -5.52706900 | -1.77205100 | -2.13991100 | C | -3.62474400 | -2.78167800 | -4.72026300 |
| H | 2.08238800  | 2.41339900  | 2.02189700  | H | -2.67665600 | -2.24215500 | -4.61302200 |
| H | 1.35494400  | 3.20436700  | 4.23073800  | H | -3.49064500 | -3.53892300 | -5.50182200 |
| H | -2.61349700 | -3.17937600 | 0.37171600  | H | -4.38459500 | -2.07313800 | -5.06306500 |
| H | -1.86118000 | -5.10001800 | 1.69018200  | C | -3.03419000 | -4.52263300 | -2.97024200 |
| H | 1.27749800  | -2.52445500 | -1.00746400 | H | -2.01284300 | -4.13349100 | -2.88715900 |
| H | 3.15800500  | -1.10615900 | 2.56352500  | H | -3.29976100 | -4.96770800 | -2.00442700 |
| H | 4.45516700  | -0.35288800 | 0.65648100  | H | -3.01344700 | -5.32326800 | -3.71790800 |
| H | 1.72566200  | 2.71789300  | -0.57032100 | C | 3.53074000  | 4.69129600  | -1.06517200 |
| H | -1.37557300 | 2.55726700  | 0.34712300  | H | 4.31877700  | 5.33704500  | -0.66657200 |
| H | -3.57483500 | -0.30358400 | 2.66145000  | C | 2.17482700  | 5.25766300  | -0.61527400 |
| H | -4.73884500 | 0.39850400  | 0.36265100  | H | 1.33655000  | 4.73309900  | -1.08544300 |
| H | -2.19420500 | -2.34637200 | -1.73103500 | H | 2.04814600  | 5.19582100  | 0.47232300  |
| N | -6.58215400 | -2.22004000 | -2.99981200 | H | 2.09465400  | 6.30990700  | -0.90960100 |
| C | -7.59981500 | -3.08093600 | -2.41542300 | C | 3.64933600  | 4.71134800  | -2.60220700 |
| H | -7.12387400 | -3.80820400 | -1.74999600 | H | 3.37124300  | 5.69348600  | -3.00260500 |
| H | -8.37317000 | -2.54418600 | -1.83863300 | H | 4.67231900  | 4.48548500  | -2.91632300 |
| H | -8.10623700 | -3.63407300 | -3.21602300 | H | 2.98272800  | 3.96356900  | -3.04394200 |
| C | -7.05790600 | -1.29673300 | -4.02012800 | C | 6.74607300  | 0.99086400  | 0.47866000  |
| H | -6.21391800 | -0.72784000 | -4.42051100 | H | 7.47247200  | 1.78450300  | 0.30135800  |
| H | -7.50492300 | -1.86822300 | -4.84323100 | C | 6.84636300  | 0.61720300  | 1.97048300  |
| H | -7.81517100 | -0.57459500 | -3.66710200 | H | 6.15893000  | -0.19739500 | 2.22645500  |
| N | -3.70769100 | 4.15528600  | 3.93888700  | H | 7.86151300  | 0.28370000  | 2.21416600  |
| N | 6.17551300  | 3.77208900  | -0.57750500 | H | 6.60374300  | 1.47329700  | 2.60993300  |
| N | 3.71737200  | -5.53410000 | 1.54602000  | C | 7.13177400  | -0.19858600 | -0.42035200 |
| C | -3.28983000 | 4.09872000  | 5.33067900  | H | 6.46026700  | -1.05155300 | -0.26544000 |
| H | -3.19526800 | 5.12076200  | 5.71960200  | H | 7.08410300  | 0.07500300  | -1.47984400 |
| H | -3.97739500 | 3.55218000  | 5.99881600  | H | 8.15155300  | -0.53200800 | -0.19653800 |
| H | -2.30723000 | 3.62019200  | 5.39073000  | H | -0.18573000 | 1.83672300  | 5.60820500  |
| C | -4.99084600 | 4.79405300  | 3.68956800  | H | -0.20873700 | -4.81657700 | 3.49619400  |
| H | -5.13233300 | 4.92243600  | 2.61152800  | O | 0.82699100  | -2.43378100 | 4.23741500  |
| H | -5.85790600 | 4.23179600  | 4.08044600  | O | -1.19526600 | -0.52831300 | 4.84050300  |
| H | -4.99916900 | 5.78723400  | 4.15492600  | C | 1.12535400  | -3.49206400 | 5.14096600  |
| C | 7.09495600  | 3.47523100  | -1.66702000 | H | 1.70900100  | -4.28167200 | 4.65190100  |
| H | 7.52831200  | 4.41359000  | -2.03576400 | H | 1.72643000  | -3.04696300 | 5.93449100  |
| H | 7.93086400  | 2.80675500  | -1.39735300 | H | 0.21100200  | -3.91899200 | 5.57129800  |
| H | 6.54400000  | 3.00917500  | -2.48891600 | C | -1.02538200 | -0.59498400 | 6.25414400  |
| C | 6.76559100  | 4.42381700  | 0.58166400  | H | -1.37420600 | 0.31450500  | 6.75663600  |
| H | 7.46720300  | 3.78840400  | 1.15180700  | H | -1.63712800 | -1.43446800 | 6.58966800  |
| H | 7.31326100  | 5.31599600  | 0.25460800  | H | 0.02611000  | -0.77507500 | 6.50616800  |
| H | 5.97107700  | 4.74456400  | 1.26355800  | C | -4.80665600 | 1.38955900  | 4.36828400  |
| C | 2.81292200  | -6.45307800 | 2.21756300  | H | -5.18110900 | 2.32035900  | 4.79707600  |
| H | 2.05449400  | -6.90690200 | 1.55339200  | C | -6.02190300 | 0.66235800  | 3.76464800  |
| H | 3.39145400  | -7.26668300 | 2.67152600  | H | -5.74709000 | -0.31922600 | 3.36199900  |
| H | 2.28208600  | -5.92561200 | 3.01745800  | H | -6.78824400 | 0.50052400  | 4.53100800  |
| C | 4.63810900  | -6.15621500 | 0.60274100  | H | -6.46927700 | 1.24817800  | 2.95417100  |
| H | 5.23891700  | -5.38229200 | 0.11736600  | C | -4.18461900 | 0.56806700  | 5.50981200  |
| H | 5.31785400  | -6.82174100 | 1.15040400  | H | -3.75368400 | -0.36539000 | 5.13477700  |

|    |             |             |             |
|----|-------------|-------------|-------------|
| H  | -3.38276300 | 1.12954500  | 5.99895900  |
| H  | -4.94156700 | 0.32473700  | 6.26427200  |
| C  | -2.00147700 | 4.80372400  | 1.77253100  |
| H  | -2.77407900 | 5.47240400  | 2.16061800  |
| C  | -0.72083600 | 5.06884800  | 2.58734300  |
| H  | 0.09496000  | 4.42579700  | 2.23847200  |
| H  | -0.40556900 | 6.11335500  | 2.48009000  |
| H  | -0.88364000 | 4.86490600  | 3.65002900  |
| C  | -1.77016800 | 5.14971600  | 0.29520500  |
| H  | -0.91009600 | 4.61346000  | -0.11945700 |
| H  | -2.64867000 | 4.91589100  | -0.31814500 |
| H  | -1.55777100 | 6.21981700  | 0.19245000  |
| C  | 4.45741400  | -3.39786300 | 3.28350100  |
| H  | 4.18957100  | -4.35090200 | 3.75454300  |
| C  | 4.39431500  | -2.29392600 | 4.35248700  |
| H  | 4.84733800  | -1.36163400 | 3.99307200  |
| H  | 3.36905600  | -2.06613300 | 4.65614500  |
| H  | 4.95998800  | -2.60370400 | 5.23768700  |
| C  | 5.90925500  | -3.53093100 | 2.77661400  |
| H  | 6.21630800  | -2.62002800 | 2.24844800  |
| H  | 6.59503400  | -3.67809100 | 3.61914800  |
| H  | 6.02005000  | -4.37708100 | 2.09670000  |
| C  | 1.95120400  | -5.11020900 | -0.87742300 |
| H  | 2.27441800  | -6.07104800 | -0.47486800 |
| C  | 0.42590800  | -5.20663100 | -1.06386700 |
| H  | 0.00659800  | -4.28935300 | -1.49150200 |
| H  | 0.17927900  | -6.02875100 | -1.74528100 |
| H  | -0.07852500 | -5.38141900 | -0.10931100 |
| C  | 2.66225700  | -4.90168200 | -2.22928800 |
| H  | 2.36445400  | -3.95395800 | -2.69188400 |
| H  | 3.75015200  | -4.88574200 | -2.10520100 |
| H  | 2.40870400  | -5.70937300 | -2.92571700 |
| Rh | -0.07522000 | 0.13028900  | -1.23164700 |
| C  | -0.57054500 | 4.97462600  | -3.00999400 |
| C  | -1.02422600 | 3.66644100  | -2.89298200 |
| C  | -0.49978800 | 2.64601800  | -3.70737200 |
| C  | 0.48659300  | 2.97684200  | -4.65437900 |
| C  | 0.94526100  | 4.28318400  | -4.78896600 |
| C  | 0.41752900  | 5.25907300  | -3.95105600 |
| H  | -0.95236400 | 5.77046700  | -2.38097500 |
| H  | -1.78559000 | 3.43689800  | -2.15496500 |
| H  | 0.90282700  | 2.19375400  | -5.28076300 |
| H  | 1.71524500  | 4.55068100  | -5.50385700 |
| F  | 0.89510000  | 6.51334000  | -4.02890300 |
| C  | -0.94181700 | 1.25759600  | -3.62786200 |
| H  | -0.47579500 | 0.58831900  | -4.34388400 |
| C  | -1.91862700 | 0.72514200  | -2.83857200 |
| H  | -2.27253000 | -0.27603400 | -3.04696500 |
| H  | -2.55703100 | 1.33363300  | -2.20565800 |
| C  | 1.27146200  | -1.11479100 | -4.21678900 |
| C  | 1.62534800  | -0.81472000 | -5.54261200 |
| C  | 1.15397800  | -1.59897200 | -6.59681000 |
| C  | 0.31921100  | -2.69123200 | -6.34660500 |
| C  | -0.03880400 | -2.99624200 | -5.03225900 |
| C  | 0.43233900  | -2.21462600 | -3.97495700 |
| H  | 2.27745400  | 0.03044900  | -5.74535700 |
| H  | 1.44041600  | -1.35529700 | -7.61634800 |
| H  | -0.04322500 | -3.30274600 | -7.16761500 |
| H  | -0.67660900 | -3.85028100 | -4.82588200 |
| H  | 0.16079200  | -2.47631200 | -2.95599600 |
| Se | 1.99812300  | -0.02521000 | -2.76481000 |

H -0.17368800 1.59752100 -0.84892800

### 32-ts-S

B3LYP-D3 SCF energy: -4539.841232 a.u.

B3LYP-D3 enthalpy: -4537.934079 a.u.

B3LYP-D3 free energy: -4538.184888 a.u.

M06 SCF energy in solution: -4538.810831 a.u.

Imaginary frequency: -126.44 cm<sup>-1</sup>

### Cartesian coordinates

| ATOM | X           | Y           | Z           |
|------|-------------|-------------|-------------|
| C    | 0.66011600  | -1.29014200 | -3.99150500 |
| C    | 0.11169100  | -1.23804000 | -2.69422600 |
| C    | -0.76548600 | -0.18255600 | -2.37215700 |
| C    | -1.06358500 | 0.79719800  | -3.33056300 |
| C    | -0.49881200 | 0.73137300  | -4.60244700 |
| C    | 0.36221000  | -0.30892000 | -4.94032200 |
| C    | 0.43954100  | -2.36436500 | -1.76504700 |
| C    | 1.27619900  | -2.24083400 | -0.63464100 |
| C    | -0.07312700 | -3.64364000 | -2.09094100 |
| C    | 1.58187500  | -3.37500000 | 0.13809600  |
| C    | 0.20671100  | -4.75575800 | -1.29192100 |
| C    | 1.04422000  | -4.61400600 | -0.18913600 |
| P    | -1.48372100 | -0.08038600 | -0.67755300 |
| P    | 1.86456200  | -0.57900200 | -0.06547500 |
| C    | -2.39418000 | -1.64689500 | -0.48196300 |
| C    | -2.33836700 | -2.33336000 | 0.72801900  |
| C    | -3.14997900 | -2.17016400 | -1.53806100 |
| C    | -2.99521500 | -3.55926700 | 0.89825600  |
| C    | -3.86246800 | -3.36003300 | -1.39476600 |
| C    | -3.77276100 | -4.06779000 | -0.16561500 |
| C    | -2.75232100 | 1.23568300  | -0.77525800 |
| C    | -4.11497500 | 0.95270300  | -0.82450600 |
| C    | -2.34034700 | 2.57611500  | -0.74804500 |
| C    | -5.07460500 | 1.97491500  | -0.85202400 |
| C    | -3.26175000 | 3.62191400  | -0.76143500 |
| C    | -4.64790700 | 3.31737600  | -0.79164800 |
| C    | 2.61065900  | 0.25261500  | -1.50642200 |
| C    | 2.33639000  | 1.59734400  | -1.76616400 |
| C    | 3.51922400  | -0.42872800 | -2.32397700 |
| C    | 2.92738900  | 2.26653400  | -2.83894900 |
| C    | 4.16265400  | 0.21706400  | -3.38588300 |
| C    | 3.83079800  | 1.56299900  | -3.67039600 |
| C    | 3.24154700  | -0.90737300 | 1.10237100  |
| C    | 4.56492800  | -0.55347300 | 0.83647800  |
| C    | 2.93693900  | -1.46360800 | 2.35229500  |
| C    | 5.57799100  | -0.74019300 | 1.78865400  |
| C    | 3.91746600  | -1.70073300 | 3.31350100  |
| C    | 5.25824700  | -1.33230900 | 3.03162000  |
| H    | -1.74591400 | 1.60372000  | -3.09123900 |
| H    | -0.73446800 | 1.49596100  | -5.33664300 |
| H    | 2.25347200  | -3.30340600 | 0.98229500  |
| H    | 1.28513800  | -5.48234100 | 0.41723900  |
| H    | -1.76718900 | -1.91956700 | 1.55401000  |
| H    | -3.17412800 | -1.63414600 | -2.47915700 |
| H    | -4.44966600 | -0.07768900 | -0.84134500 |
| H    | -1.28099500 | 2.80456200  | -0.69057500 |
| H    | 1.62530800  | 2.12348600  | -1.14012600 |
| H    | 3.73397800  | -1.47512500 | -2.12778600 |
| H    | 4.81909700  | -0.10949300 | -0.11853700 |
| H    | 1.90839400  | -1.72454400 | 2.58468000  |



|   |             |             |             |   |             |             |             |
|---|-------------|-------------|-------------|---|-------------|-------------|-------------|
| N | 6.22906500  | -1.57420800 | 4.05457600  | H | -1.24036900 | 6.39580400  | -1.40737700 |
| C | 7.29668900  | -2.52802600 | 3.79554700  | C | -2.66746100 | 5.46698300  | 0.82289000  |
| H | 6.90955500  | -3.34903600 | 3.18493000  | H | -2.31750100 | 6.50159500  | 0.91967900  |
| H | 8.17809000  | -2.10582900 | 3.28377800  | H | -3.63446700 | 5.38232200  | 1.32812700  |
| H | 7.63986300  | -2.94853000 | 4.74948600  | H | -1.95391200 | 4.81874200  | 1.34387100  |
| C | 6.58724900  | -0.44503900 | 4.89914100  | C | -6.54146900 | 1.57025200  | -0.95437900 |
| H | 5.68711900  | 0.12227000  | 5.15457700  | H | -7.14795800 | 2.47507800  | -1.01044900 |
| H | 7.03238000  | -0.81477700 | 5.83094400  | C | -6.80849800 | 0.77192300  | -2.24532400 |
| H | 7.30777000  | 0.25267300  | 4.43517700  | H | -6.25274200 | -0.17307200 | -2.25631600 |
| N | 4.35841300  | 2.26951800  | -4.79776400 | H | -7.87426900 | 0.53156800  | -2.33209700 |
| N | -5.55522000 | 4.42564700  | -0.74059200 | H | -6.51284600 | 1.34395800  | -3.13181100 |
| N | -4.49148400 | -5.30717600 | -0.08134700 | C | -6.99577300 | 0.78380600  | 0.28976500  |
| C | 4.01950600  | 1.78255000  | -6.12542400 | H | -6.44239700 | -0.15765700 | 0.38945300  |
| H | 4.06499500  | 2.61685800  | -6.83705800 | H | -6.83488900 | 1.36497400  | 1.20433700  |
| H | 4.67801000  | 0.98374700  | -6.50814800 | H | -8.06202600 | 0.53936000  | 0.22115800  |
| H | 2.99377600  | 1.40059400  | -6.11497100 | H | 0.79881800  | -0.35890100 | -5.93168200 |
| C | 5.67946800  | 2.86067600  | -4.65281800 | H | -0.20978900 | -5.72720100 | -1.52689500 |
| H | 5.75807800  | 3.34198900  | -3.67246700 | O | -0.83708000 | -3.71027700 | -3.21568900 |
| H | 6.51093600  | 2.13875900  | -4.74387600 | O | 1.49755900  | -2.33673100 | -4.25133400 |
| H | 5.81928400  | 3.63010400  | -5.42183600 | C | -1.26689500 | -4.98903400 | -3.66674200 |
| C | -6.40145100 | 4.55499300  | 0.43635900  | H | -1.99195300 | -5.43197700 | -2.97299700 |
| H | -6.69780600 | 5.60538600  | 0.55112200  | H | -1.75294600 | -4.81900900 | -4.62789300 |
| H | -7.32461300 | 3.95012000  | 0.41236700  | H | -0.41874200 | -5.67151600 | -3.80317400 |
| H | -5.83210200 | 4.26422700  | 1.32418500  | C | 1.42464400  | -2.92393300 | -5.54817000 |
| C | -6.15986300 | 4.83140800  | -2.00002400 | H | 1.89437300  | -2.29636300 | -6.31431400 |
| H | -6.97692100 | 4.17224400  | -2.34480600 | H | 1.97514300  | -3.86438800 | -5.48243800 |
| H | -6.56876100 | 5.84377700  | -1.89560000 | H | 0.38159800  | -3.12102300 | -5.82186000 |
| H | -5.39315700 | 4.85392400  | -2.78150000 | C | 5.22017500  | -0.54412500 | -4.17978900 |
| C | -3.70703000 | -6.51458300 | -0.28029200 | H | 5.70007200  | 0.15739400  | -4.86386500 |
| H | -3.07820000 | -6.79355200 | 0.58518700  | C | 6.32698100  | -1.08874300 | -3.25820600 |
| H | -4.37949700 | -7.35503100 | -0.49079800 | H | 5.94275600  | -1.85022100 | -2.56983000 |
| H | -3.04629600 | -6.38495500 | -1.14414500 | H | 7.12273900  | -1.55301900 | -3.85153000 |
| C | -5.56606500 | -5.42670300 | 0.89522800  | H | 6.77229000  | -0.28582400 | -2.66034200 |
| H | -6.06876100 | -4.46151700 | 1.00204300  | C | 4.60178400  | -1.66931900 | -5.02619600 |
| H | -6.30236500 | -6.15551200 | 0.53214200  | H | 4.07341100  | -2.39201700 | -4.39686100 |
| H | -5.24327100 | -5.75271200 | 1.89814200  | H | 3.87916000  | -1.26314200 | -5.74093400 |
| C | 6.99595500  | -0.30373000 | 1.43419800  | H | 5.37952800  | -2.19889000 | -5.58838300 |
| H | 7.59096900  | -0.30859200 | 2.34933900  | C | 2.55343400  | 3.71436100  | -3.13104500 |
| C | 7.04666300  | 1.13215200  | 0.87873700  | H | 3.34005200  | 4.13097100  | -3.76466600 |
| H | 6.55102100  | 1.21308600  | -0.09581300 | C | 1.23975200  | 3.77094900  | -3.93367200 |
| H | 6.56458200  | 1.83975500  | 1.56231400  | H | 0.41459500  | 3.33521100  | -3.35865800 |
| H | 8.08814400  | 1.44383900  | 0.74189300  | H | 0.97935200  | 4.80764800  | -4.17748400 |
| C | 7.64033800  | -1.29598600 | 0.44683400  | H | 1.32954500  | 3.20752500  | -4.86812200 |
| H | 8.66930600  | -0.99781700 | 0.21481500  | C | 2.45082900  | 4.57578300  | -1.86234400 |
| H | 7.66277800  | -2.31089700 | 0.85659300  | H | 1.59526800  | 4.28217600  | -1.24470300 |
| H | 7.07769000  | -1.32624100 | -0.49211200 | H | 3.35595600  | 4.50241700  | -1.24839100 |
| C | 3.51923000  | -2.31875100 | 4.64678500  | H | 2.30348600  | 5.62733300  | -2.13350900 |
| H | 4.44921900  | -2.57444300 | 5.16173800  | C | -4.75133400 | -3.86763300 | -2.52777600 |
| C | 2.75980500  | -1.30006100 | 5.51905600  | H | -4.60798200 | -4.95220500 | -2.59811100 |
| H | 1.80948000  | -1.00725400 | 5.05724200  | C | -4.42657600 | -3.24619800 | -3.89650100 |
| H | 2.53047900  | -1.72778200 | 6.50203800  | H | -4.74507200 | -2.19747500 | -3.94566000 |
| H | 3.35003700  | -0.39049800 | 5.67489400  | H | -3.35731500 | -3.27646700 | -4.12454200 |
| C | 2.70011900  | -3.61000400 | 4.46868000  | H | -4.96607900 | -3.78266200 | -4.68436100 |
| H | 1.73331000  | -3.42378400 | 3.98290100  | C | -6.23929600 | -3.62415500 | -2.19919600 |
| H | 3.24135000  | -4.34302700 | 3.86003100  | H | -6.43354700 | -2.55169300 | -2.07507700 |
| H | 2.49340500  | -4.06570200 | 5.44380300  | H | -6.87495700 | -3.98852800 | -3.01469200 |
| C | -2.78349500 | 5.06453100  | -0.66081400 | H | -6.53595200 | -4.13633300 | -1.28236300 |
| H | -3.55511200 | 5.69492400  | -1.11133000 | C | -2.85445700 | -4.27241100 | 2.23884400  |
| C | -1.45946200 | 5.32223200  | -1.39656200 | H | -3.28419400 | -5.27069100 | 2.14517400  |
| H | -0.61588800 | 4.83144100  | -0.89949200 | C | -1.37942100 | -4.46914000 | 2.63688900  |
| H | -1.49375700 | 4.96931200  | -2.43353500 | H | -0.86833800 | -3.51430900 | 2.79577100  |

|    |             |             |            |   |             |             |             |
|----|-------------|-------------|------------|---|-------------|-------------|-------------|
| H  | -1.31405400 | -5.03664200 | 3.57246500 | C | -3.23684000 | -2.28200100 | -1.31794200 |
| H  | -0.83320200 | -5.01323000 | 1.86027500 | C | -3.13235100 | -3.39661000 | 1.25780600  |
| C  | -3.64013900 | -3.52259400 | 3.33260000 | C | -3.98273800 | -3.42926200 | -1.04950500 |
| H  | -3.26509700 | -2.50228600 | 3.46036300 | C | -3.92033800 | -3.99771700 | 0.25157600  |
| H  | -4.70376700 | -3.46201000 | 3.07837700 | C | -2.73899200 | 1.17751600  | -0.90428200 |
| H  | -3.54686800 | -4.03488500 | 4.29693800 | C | -4.11163300 | 0.94010200  | -0.89301900 |
| Rh | 0.09699200  | 0.45022400  | 1.04413300 | C | -2.28276600 | 2.49776600  | -1.03684200 |
| C  | 1.02152800  | 5.59182700  | 1.39258400 | C | -5.03721000 | 1.98731300  | -1.01203500 |
| C  | 1.06566100  | 4.23633500  | 1.70117900 | C | -3.16879900 | 3.56837100  | -1.14820900 |
| C  | 0.47596700  | 3.74214300  | 2.88039400 | C | -4.56456900 | 3.31221100  | -1.11164900 |
| C  | -0.15893600 | 4.65518000  | 3.74587200 | C | 2.61343400  | 0.00011700  | -1.52568800 |
| C  | -0.21021100 | 6.01195600  | 3.45268400 | C | 2.35701900  | 1.29949400  | -1.96836000 |
| C  | 0.37532700  | 6.45763900  | 2.27013000 | C | 3.51712200  | -0.79748500 | -2.23694300 |
| H  | 1.46532900  | 5.98485300  | 0.48513200 | C | 2.96369900  | 1.80944400  | -3.11745200 |
| H  | 1.56399600  | 3.55865800  | 1.01754400 | C | 4.17375300  | -0.31082500 | -3.37256800 |
| H  | -0.63068900 | 4.28634900  | 4.65279600 | C | 3.86193000  | 0.98833000  | -3.83939400 |
| H  | -0.70226700 | 6.72270000  | 4.10735400 | C | 3.21316000  | -0.84454300 | 1.21243400  |
| F  | 0.29902600  | 7.76123700  | 1.95735200 | C | 4.54352100  | -0.54093800 | 0.92103700  |
| C  | 0.50447100  | 2.31966300  | 3.23564600 | C | 2.88898800  | -1.24368700 | 2.51628200  |
| H  | 0.22263100  | 2.10887300  | 4.26441500 | C | 5.54441400  | -0.62438100 | 1.90041100  |
| C  | 1.35743400  | 1.34639300  | 2.58012000 | C | 3.85643900  | -1.37739400 | 3.50981900  |
| H  | 1.68149000  | 0.55159900  | 3.24809800 | C | 5.20452800  | -1.06049400 | 3.20132500  |
| H  | 2.20914400  | 1.76895100  | 2.04677100 | H | -1.77350300 | 1.22414400  | -3.27826300 |
| C  | -1.85306300 | 0.17063700  | 3.97361700 | H | -0.76467700 | 0.83547800  | -5.49520500 |
| C  | -2.86941900 | 0.27189600  | 4.93412200 | H | 2.17354500  | -3.21980400 | 1.36576100  |
| C  | -2.94375900 | -0.65278900 | 5.97723700 | H | 1.15231900  | -5.42690200 | 1.06062900  |
| C  | -2.00176700 | -1.67930800 | 6.08271900 | H | -1.85296800 | -1.73299100 | 1.73351900  |
| C  | -0.99099500 | -1.78684000 | 5.12717800 | H | -3.24291700 | -1.85193200 | -2.31232000 |
| C  | -0.92219900 | -0.87323400 | 4.07310400 | H | -4.48000900 | -0.07446100 | -0.79409400 |
| H  | -3.59988500 | 1.07320200  | 4.86809900 | H | -1.21526100 | 2.69236500  | -1.03334500 |
| H  | -3.73784300 | -0.56489300 | 6.71343500 | H | 1.64795600  | 1.91442500  | -1.42660200 |
| H  | -2.05981000 | -2.39315300 | 6.89890100 | H | 3.71818200  | -1.80966800 | -1.89843900 |
| H  | -0.25864800 | -2.58581400 | 5.19167600 | H | 4.81236600  | -0.21588800 | -0.07691500 |
| H  | -0.13044500 | -0.97563100 | 3.33567500 | H | 1.85463800  | -1.46146100 | 2.76613100  |
| Se | -1.76817000 | 1.51583300  | 2.55209400 | N | 6.16170300  | -1.18886900 | 4.25737000  |
| H  | 0.36466600  | 1.70835800  | 0.24785500 | C | 7.22143800  | -2.17698700 | 4.12552300  |

### 33-S

B3LYP-D3 SCF energy: -4539.842844 a.u.

B3LYP-D3 enthalpy: -4537.934740 a.u.

B3LYP-D3 free energy: -4538.188250 a.u.

M06 SCF energy in solution: -4538.815762 a.u.

#### Cartesian coordinates

| ATOM | X           | Y           | Z           |   | X           | Y           | Z           |
|------|-------------|-------------|-------------|---|-------------|-------------|-------------|
| C    | 0.62082200  | -1.76863800 | -3.81696400 | N | 4.40665300  | 1.52770300  | -5.04797100 |
| C    | 0.07317000  | -1.55505600 | -2.53635700 | N | -5.43334900 | 4.45107400  | -1.16699000 |
| C    | -0.79972400 | -0.46426800 | -2.34691300 | N | -4.67778100 | -5.19729800 | 0.46916900  |
| C    | -1.09513500 | 0.39095900  | -3.41780100 | C | 4.06686100  | 0.87086800  | -6.29993800 |
| C    | -0.53106500 | 0.16680200  | -4.67207700 | H | 4.13530000  | 1.59915300  | -7.11813400 |
| C    | 0.32664300  | -0.90979300 | -4.87925800 | H | 4.71054200  | 0.01394400  | -6.56382200 |
| C    | 0.38193600  | -2.56887400 | -1.47838200 | H | 3.03290400  | 0.51514900  | -6.24781200 |
| C    | 1.22083600  | -2.33279000 | -0.36727700 | C | 5.73492300  | 2.11547500  | -4.97360500 |
| C    | -0.16037300 | -3.86568700 | -1.65184600 | H | 5.81262900  | 2.72694300  | -4.06859200 |
| C    | 1.49946800  | -3.37485900 | 0.53475900  | H | 6.55677000  | 1.37714400  | -4.95575600 |
| C    | 0.09202700  | -4.88193800 | -0.72585700 | H | 5.89168300  | 2.76918700  | -5.84022200 |
| C    | 0.93224300  | -4.63083200 | 0.35516500  | C | -6.24897300 | 4.73991700  | 0.00286400  |
| P    | -1.50627300 | -0.15782500 | -0.67228500 | H | -6.51140100 | 5.80548300  | 0.00268000  |
| P    | 1.84925900  | -0.63006700 | 0.00431800  | H | -7.19011100 | 4.16616600  | 0.06571100  |
| C    | -2.46985700 | -1.66626300 | -0.32168000 | H | -5.66893400 | 4.53428500  | 0.90748900  |
| C    | -2.43829500 | -2.21743900 | 0.95652200  | C | -6.05183200 | 4.73689800  | -2.45246100 |
|      |             |             |             | H | -6.89958800 | 4.07501000  | -2.70578900 |
|      |             |             |             | H | -6.42179000 | 5.76944500  | -2.45471900 |

|   |             |             |             |    |             |             |             |
|---|-------------|-------------|-------------|----|-------------|-------------|-------------|
| H | -5.30293800 | 4.64284100  | -3.24570400 | C  | 5.22544800  | -1.18688200 | -4.04695700 |
| C | -3.93285200 | -6.44407600 | 0.41373900  | H  | 5.71672400  | -0.59289500 | -4.81913800 |
| H | -3.31831900 | -6.64481500 | 1.31066500  | C  | 6.32122800  | -1.61010200 | -3.05126900 |
| H | -4.63168300 | -7.28064000 | 0.29253700  | H  | 5.92417300  | -2.26342000 | -2.26585700 |
| H | -3.26379300 | -6.43393800 | -0.45327900 | H  | 7.11420300  | -2.16175400 | -3.56868000 |
| C | -5.76138900 | -5.17167100 | 1.44233200  | H  | 6.77325500  | -0.73666000 | -2.56832000 |
| H | -6.23445200 | -4.18581900 | 1.43323200  | C  | 4.59781800  | -2.41221600 | -4.73235000 |
| H | -6.51800200 | -5.91452700 | 1.15802300  | H  | 4.05127800  | -3.03069400 | -4.01354200 |
| H | -5.45531600 | -5.39060200 | 2.47917500  | H  | 3.88948900  | -2.10192700 | -5.50668600 |
| C | 6.97099400  | -0.24725600 | 1.51379000  | H  | 5.37289500  | -3.02756700 | -5.20356400 |
| H | 7.55612100  | -0.15056100 | 2.43018100  | C  | 2.61407800  | 3.21208000  | -3.59840100 |
| C | 7.04358400  | 1.11286300  | 0.79420000  | H  | 3.38652200  | 3.51167600  | -4.31062500 |
| H | 6.55944300  | 1.08329400  | -0.18898400 | C  | 1.27205300  | 3.19812300  | -4.35401100 |
| H | 6.56172800  | 1.90051300  | 1.38388800  | H  | 0.45823500  | 2.87136900  | -3.69654700 |
| H | 8.08988100  | 1.39618600  | 0.63428200  | H  | 1.02931500  | 4.19917900  | -4.72946500 |
| C | 7.61482700  | -1.35483800 | 0.65745600  | H  | 1.30986700  | 2.50883300  | -5.20380700 |
| H | 8.64956600  | -1.09610200 | 0.40469700  | C  | 2.58375300  | 4.24144600  | -2.45717500 |
| H | 7.62135500  | -2.31497000 | 1.18340600  | H  | 1.75182100  | 4.05434000  | -1.76973400 |
| H | 7.06234000  | -1.48930300 | -0.27834800 | H  | 3.51346700  | 4.23001900  | -1.87678500 |
| C | 3.43801800  | -1.83006700 | 4.90215000  | H  | 2.44383800  | 5.24976900  | -2.86311700 |
| H | 4.36023500  | -2.03736600 | 5.45176900  | C  | -4.87798900 | -4.03711000 | -2.12667500 |
| C | 2.68694100  | -0.70761700 | 5.64464400  | H  | -4.76922600 | -5.12635900 | -2.06874200 |
| H | 1.74194900  | -0.46115000 | 5.14599700  | C  | -4.52082200 | -3.59027300 | -3.55417500 |
| H | 2.44917000  | -1.01459200 | 6.66989600  | H  | -4.80395600 | -2.54502100 | -3.72957900 |
| H | 3.28591700  | 0.20801700  | 5.69519900  | H  | -3.45102200 | -3.68062800 | -3.76324400 |
| C | 2.60000400  | -3.12095700 | 4.86876800  | H  | -5.07018600 | -4.19808900 | -4.28105500 |
| H | 1.63663700  | -2.97569100 | 4.36213700  | C  | -6.35999500 | -3.71118000 | -1.84675900 |
| H | 3.13027300  | -3.92644900 | 4.34856900  | H  | -6.52099200 | -2.62612400 | -1.85212600 |
| H | 2.38474500  | -3.45994800 | 5.88859400  | H  | -7.00038900 | -4.14962800 | -2.62103900 |
| C | -2.64128700 | 4.99534100  | -1.22959000 | H  | -6.68018600 | -4.10224700 | -0.87943700 |
| H | -3.39963000 | 5.59269200  | -1.74339600 | C  | -3.01793000 | -3.96036000 | 2.67010600  |
| C | -1.32272600 | 5.11641200  | -2.00918000 | H  | -3.47356300 | -4.95146100 | 2.68448400  |
| H | -0.48643000 | 4.66143200  | -1.46758200 | C  | -1.55101300 | -4.14896000 | 3.10066100  |
| H | -1.38702000 | 4.64211200  | -2.99501000 | H  | -1.01628700 | -3.19533800 | 3.15961300  |
| H | -1.06938100 | 6.17264400  | -2.15306000 | H  | -1.50545900 | -4.61442800 | 4.09217000  |
| C | -2.48573200 | 5.57382000  | 0.19094100  | H  | -1.01338900 | -4.78605100 | 2.39180200  |
| H | -2.11578700 | 6.60500600  | 0.15226200  | C  | -3.78944400 | -3.07378400 | 3.66708500  |
| H | -3.44274600 | 5.57173800  | 0.72175400  | H  | -3.38782800 | -2.05548000 | 3.68206300  |
| H | -1.77049300 | 4.98235300  | 0.77338200  | H  | -4.84980500 | -3.01434000 | 3.39966900  |
| C | -6.51918200 | 1.62778700  | -1.03810900 | H  | -3.71474700 | -3.47673100 | 4.68376700  |
| H | -7.09521400 | 2.54170700  | -1.18850700 | Rh | 0.11936500  | 0.55991100  | 0.97254100  |
| C | -6.84513800 | 0.69431300  | -2.22020000 | C  | 1.22820200  | 5.65845000  | 0.68385500  |
| H | -6.32513800 | -0.26661300 | -2.12989900 | C  | 1.17188400  | 4.35261800  | 1.16925900  |
| H | -7.92080400 | 0.48766200  | -2.25799300 | C  | 0.56355300  | 4.06525100  | 2.40183000  |
| H | -6.54925300 | 1.14632900  | -3.17336900 | C  | 0.01384500  | 5.12933500  | 3.13927100  |
| C | -6.97068700 | 1.00987500  | 0.29873900  | C  | 0.05828400  | 6.43696400  | 2.66853900  |
| H | -6.44580400 | 0.06796800  | 0.49837200  | C  | 0.66095000  | 6.67894500  | 1.43715400  |
| H | -6.77062100 | 1.68909500  | 1.13480000  | H  | 1.69426200  | 5.89272600  | -0.26626000 |
| H | -8.04558400 | 0.79629300  | 0.28006600  | H  | 1.61426100  | 3.55648000  | 0.58170600  |
| H | 0.76211400  | -1.08273500 | -5.85717100 | H  | -0.46635300 | 4.92387900  | 4.09289100  |
| H | -0.34740300 | -5.86424200 | -0.84586700 | H  | -0.36739600 | 7.26256100  | 3.22830600  |
| O | -0.92443500 | -4.04719000 | -2.76377400 | F  | 0.68636400  | 7.93551700  | 0.95867700  |
| O | 1.44968800  | -2.84598500 | -3.94701800 | C  | 0.46143600  | 2.67851100  | 2.94147400  |
| C | -1.39029800 | -5.35832500 | -3.05782600 | H  | 0.36621300  | 2.67903600  | 4.02950300  |
| H | -2.12713100 | -5.69291000 | -2.31731500 | C  | 1.33391000  | 1.58711100  | 2.38887200  |
| H | -1.87183900 | -5.29251200 | -4.03389600 | H  | 1.61327000  | 0.88153700  | 3.17195800  |
| H | -0.56208400 | -6.07620200 | -3.10830400 | H  | 2.25010400  | 1.96537300  | 1.92981400  |
| C | 1.37728000  | -3.58061600 | -5.16612300 | C  | -1.79394500 | 0.73754200  | 3.92536400  |
| H | 1.85202200  | -3.04959600 | -5.99938500 | C  | -2.83216100 | 1.00081200  | 4.82599000  |
| H | 1.92294300  | -4.50943200 | -4.98916400 | C  | -3.01656700 | 0.17275000  | 5.93604800  |
| H | 0.33396600  | -3.80318500 | -5.41872900 | C  | -2.16238400 | -0.90915900 | 6.15932500  |

|    |             |             |            |
|----|-------------|-------------|------------|
| C  | -1.13162600 | -1.17657200 | 5.25694900 |
| C  | -0.95406000 | -0.36319300 | 4.13644100 |
| H  | -3.49038400 | 1.84992500  | 4.66691500 |
| H  | -3.82475000 | 0.38183000  | 6.63096500 |
| H  | -2.30368200 | -1.54502200 | 7.02810600 |
| H  | -0.46772900 | -2.02078800 | 5.41589800 |
| H  | -0.14973800 | -0.58435100 | 3.44172100 |
| Se | -1.53969800 | 1.96399300  | 2.40828600 |
| H  | 0.45452500  | 1.71942500  | 0.05844600 |

### 34

B3LYP-D3 SCF energy: -4539.851368 a.u.

B3LYP-D3 enthalpy: -4537.9420799 a.u.

B3LYP-D3 free energy: -4538.194248 a.u.

M06 SCF energy in solution: -4538.820827 a.u

#### Cartesian coordinates

| ATOM | X           | Y           | Z           |
|------|-------------|-------------|-------------|
| C    | 0.86367300  | 3.46917300  | 2.19333200  |
| C    | 0.94595900  | 2.14423700  | 1.71568200  |
| C    | 1.70819100  | 1.88874400  | 0.55939600  |
| C    | 2.34578700  | 2.94830400  | -0.10601300 |
| C    | 2.23486000  | 4.25031900  | 0.37501200  |
| C    | 1.49977300  | 4.51778400  | 1.52588200  |
| C    | 0.25150000  | 1.09100900  | 2.51461800  |
| C    | -0.91004300 | 0.42065200  | 2.07534200  |
| C    | 0.74266900  | 0.82787000  | 3.81587900  |
| C    | -1.56363100 | -0.46894900 | 2.94432700  |
| C    | 0.11047200  | -0.09900200 | 4.64889500  |
| C    | -1.05125700 | -0.72678500 | 4.21028900  |
| P    | 1.88695900  | 0.16684400  | -0.08496900 |
| P    | -1.49314900 | 0.59555400  | 0.31778900  |
| C    | 2.49776700  | -0.80197900 | 1.32364000  |
| C    | 1.99694500  | -2.07097100 | 1.58957100  |
| C    | 3.50953100  | -0.27082800 | 2.13449200  |
| C    | 2.45753300  | -2.81872400 | 2.68003900  |
| C    | 4.05267000  | -1.01443800 | 3.18077500  |
| C    | 3.50870100  | -2.29677800 | 3.46570500  |
| C    | 3.26193800  | 0.29180800  | -1.28904300 |
| C    | 4.55138200  | -0.13592000 | -0.97344000 |
| C    | 3.02455000  | 0.83887300  | -2.55518800 |
| C    | 5.60285900  | -0.02275400 | -1.89013500 |
| C    | 4.04782800  | 0.98437700  | -3.49170900 |
| C    | 5.35695700  | 0.55827700  | -3.15525200 |
| C    | -1.72890100 | 2.38252300  | 0.01246300  |
| C    | -1.32183200 | 2.92023800  | -1.21217700 |
| C    | -2.32539000 | 3.22384200  | 0.95821100  |
| C    | -1.45308500 | 4.27799500  | -1.49739600 |
| C    | -2.50926500 | 4.58886100  | 0.69688300  |
| C    | -2.02738000 | 5.12556700  | -0.52080700 |
| C    | -3.16953900 | -0.15999900 | 0.31179100  |
| C    | -4.32198200 | 0.61284200  | 0.14449900  |
| C    | -3.31701300 | -1.52773300 | 0.59845300  |
| C    | -5.59938800 | 0.06234500  | 0.31490700  |
| C    | -4.56366000 | -2.07690700 | 0.91712600  |
| C    | -5.72086600 | -1.26488100 | 0.78938300  |
| H    | 2.94434200  | 2.76208600  | -0.98795000 |
| H    | 2.72939100  | 5.06129600  | -0.15084300 |
| H    | -2.48082200 | -0.95418400 | 2.64802700  |
| H    | -1.56605600 | -1.42430400 | 4.86486300  |
| H    | 1.23296800  | -2.48604300 | 0.94613700  |

|   |             |             |             |
|---|-------------|-------------|-------------|
| H | 3.87946200  | 0.72628500  | 1.93008200  |
| H | 4.74807200  | -0.58719100 | -0.00941700 |
| H | 2.02297100  | 1.15815800  | -2.82505000 |
| H | -0.86298800 | 2.27273200  | -1.94686700 |
| H | -2.64712900 | 2.81496400  | 1.91173900  |
| H | -4.23200800 | 1.66143300  | -0.11764900 |
| H | -2.43369800 | -2.15465000 | 0.67633600  |
| N | -6.97020300 | -1.81731400 | 1.20529100  |
| C | -7.70608400 | -1.14744200 | 2.26750100  |
| H | -7.00130100 | -0.67937500 | 2.96038900  |
| H | -8.41252600 | -0.37508400 | 1.92006900  |
| H | -8.28525400 | -1.89420700 | 2.82594000  |
| C | -7.79963100 | -2.49540500 | 0.22208000  |
| H | -7.18922600 | -3.11127500 | -0.43849900 |
| H | -8.50736800 | -3.15517000 | 0.73831800  |
| H | -8.38897500 | -1.80348200 | -0.40829300 |
| N | -2.06788200 | 6.52347400  | -0.82731100 |
| N | 6.37642000  | 0.73150900  | -4.14460000 |
| N | 4.07545600  | -3.00469000 | 4.57628800  |
| C | -1.30482000 | 7.43026300  | 0.01595600  |
| H | -1.03059600 | 8.31861200  | -0.56741000 |
| H | -1.83346700 | 7.77758900  | 0.92028400  |
| H | -0.38239400 | 6.93378400  | 0.33308400  |
| C | -3.31584700 | 7.05111900  | -1.35694100 |
| H | -3.72228700 | 6.35490000  | -2.09769500 |
| H | -4.09358500 | 7.22400800  | -0.59134900 |
| H | -3.12223600 | 8.00704400  | -1.85857900 |
| C | 6.72704500  | -0.44330200 | -4.92844500 |
| H | 7.25097500  | -0.12789700 | -5.83884500 |
| H | 7.37523900  | -1.16392400 | -4.39801000 |
| H | 5.81356000  | -0.96804500 | -5.22586800 |
| C | 7.46332600  | 1.65497500  | -3.85909700 |
| H | 8.28655900  | 1.23219100  | -3.25776600 |
| H | 7.89300500  | 2.00500300  | -4.80618200 |
| H | 7.06768000  | 2.52531300  | -3.32654800 |
| C | 3.34236900  | -2.91895700 | 5.82880300  |
| H | 2.43123500  | -3.54408300 | 5.86146500  |
| H | 3.99372500  | -3.23116100 | 6.65393300  |
| H | 3.04172800  | -1.88112200 | 6.00860700  |
| C | 4.72435900  | -4.28625800 | 4.32918700  |
| H | 5.20718500  | -4.26552700 | 3.34832700  |
| H | 5.50124800  | -4.44669900 | 5.08785100  |
| H | 4.04932600  | -5.15759500 | 4.35589800  |
| C | -6.81460600 | 0.92681700  | -0.00674400 |
| H | -7.70354700 | 0.29513700  | 0.05030700  |
| C | -6.74843800 | 1.47497700  | -1.44599400 |
| H | -5.90621200 | 2.16411300  | -1.57879800 |
| H | -6.64036400 | 0.66795300  | -2.17913400 |
| H | -7.66538700 | 2.02572700  | -1.68349900 |
| C | -6.97903300 | 2.07799900  | 1.00128700  |
| H | -7.87632500 | 2.66561200  | 0.77598800  |
| H | -7.06284500 | 1.70632000  | 2.02729200  |
| H | -6.11791300 | 2.75149100  | 0.95983500  |
| C | -4.65686100 | -3.48931900 | 1.48861000  |
| H | -5.63310900 | -3.54857600 | 1.97860600  |
| C | -4.61487300 | -4.57403700 | 0.39764100  |
| H | -3.73698400 | -4.45959500 | -0.24413700 |
| H | -4.57952800 | -5.57058400 | 0.85428800  |
| H | -5.49779500 | -4.53745900 | -0.24395500 |
| C | -3.58201400 | -3.75473500 | 2.55906300  |
| H | -2.56964600 | -3.77662200 | 2.13979600  |

|   |             |             |             |    |             |             |             |
|---|-------------|-------------|-------------|----|-------------|-------------|-------------|
| H | -3.60121700 | -2.99059200 | 3.34477500  | H  | 6.73746100  | -1.06392300 | 2.48238700  |
| H | -3.75752800 | -4.72715500 | 3.03238500  | H  | 7.39579300  | -0.82718000 | 4.11115500  |
| C | 3.71690500  | 1.58815400  | -4.84888800 | H  | 6.46387600  | -2.28702100 | 3.73911200  |
| H | 4.65481900  | 1.64045400  | -5.40807100 | C  | 1.80086800  | -4.16846100 | 2.95104000  |
| C | 3.16483400  | 3.01905000  | -4.70980300 | H  | 2.17386900  | -4.54851400 | 3.90301100  |
| H | 2.20871600  | 3.03466300  | -4.17180700 | C  | 0.27314300  | -4.03928500 | 3.09801100  |
| H | 3.86464300  | 3.66401000  | -4.16616100 | H  | -0.19590400 | -3.71410200 | 2.16353700  |
| H | 2.99224500  | 3.46086300  | -5.69790000 | H  | -0.16522300 | -5.00739800 | 3.36582200  |
| C | 2.73733300  | 0.69078000  | -5.62900200 | H  | 0.00767300  | -3.31028400 | 3.86967600  |
| H | 2.54856500  | 1.10500100  | -6.62611200 | C  | 2.16603600  | -5.19003300 | 1.85628600  |
| H | 3.13498100  | -0.32299800 | -5.74708200 | H  | 1.79650700  | -4.86774300 | 0.87631700  |
| H | 1.77252100  | 0.60552400  | -5.11256200 | H  | 3.25092400  | -5.31918200 | 1.78172700  |
| C | 6.97577500  | -0.53257400 | -1.46387500 | H  | 1.71917400  | -6.16623100 | 2.07755600  |
| H | 7.63480900  | -0.51319900 | -2.33330300 | Rh | -0.03194200 | -0.56549300 | -1.13140700 |
| C | 7.58817200  | 0.38816400  | -0.39021700 | C  | 0.40967200  | -3.77083400 | -2.05686100 |
| H | 6.96330500  | 0.40512800  | 0.51141100  | C  | 0.39129400  | -4.82682600 | -2.98362300 |
| H | 8.58512000  | 0.03654800  | -0.10085700 | C  | -0.34075200 | -5.98665800 | -2.72195400 |
| H | 7.67951800  | 1.41770700  | -0.75274300 | C  | -1.07796200 | -6.11087700 | -1.53952600 |
| C | 6.92463400  | -1.99230000 | -0.97346400 | C  | -1.07645800 | -5.06282400 | -0.61850400 |
| H | 6.34787700  | -2.09213600 | -0.04641800 | C  | -0.33970400 | -3.90532900 | -0.87617000 |
| H | 6.46808600  | -2.64632600 | -1.72397100 | H  | 0.95652900  | -4.74037100 | -3.90718500 |
| H | 7.93831600  | -2.35568800 | -0.77007200 | H  | -0.33432100 | -6.79731900 | -3.44575300 |
| H | 1.41890900  | 5.53153900  | 1.90231500  | H  | -1.63891300 | -7.01796600 | -1.33504600 |
| H | 0.50240700  | -0.32090000 | 5.63350400  | H  | -1.62725000 | -5.15237600 | 0.31240100  |
| O | 1.84759000  | 1.53062300  | 4.18967100  | H  | -0.32587300 | -3.11436300 | -0.12863400 |
| O | 0.12282400  | 3.65933000  | 3.32280800  | Se | 1.51831300  | -2.19618100 | -2.38680200 |
| C | 2.29936800  | 1.41281000  | 5.53357900  | C  | -5.52980200 | -2.19759700 | -2.56481600 |
| H | 2.69364200  | 0.40890700  | 5.73360500  | C  | -4.32756900 | -1.51629200 | -2.68692200 |
| H | 3.10490100  | 2.13939600  | 5.64346700  | C  | -3.13363200 | -2.20683000 | -2.97141400 |
| H | 1.49892000  | 1.64588800  | 6.24669300  | C  | -3.18255500 | -3.60472200 | -3.13441300 |
| C | 0.61687500  | 4.59651400  | 4.27741700  | C  | -4.38082300 | -4.29999500 | -3.01563200 |
| H | 0.46926600  | 5.63337000  | 3.95466500  | C  | -5.53363800 | -3.58002000 | -2.72877900 |
| H | 0.03822400  | 4.42891100  | 5.18781000  | H  | -6.45650400 | -1.68333800 | -2.34086800 |
| H | 1.68041000  | 4.41843700  | 4.47376200  | H  | -4.32164400 | -0.44032800 | -2.55758700 |
| C | -3.23531000 | 5.45242900  | 1.72526200  | H  | -2.26884000 | -4.14871800 | -3.34913300 |
| H | -3.38573900 | 6.44070500  | 1.28854900  | H  | -4.43047100 | -5.37799200 | -3.12108400 |
| C | -4.63469500 | 4.89787500  | 2.04378600  | F  | -6.69397700 | -4.24628900 | -2.55218600 |
| H | -4.58536800 | 3.90667300  | 2.50850300  | C  | -1.86728500 | -1.52711300 | -3.22069500 |
| H | -5.15813200 | 5.56341800  | 2.73954900  | H  | -1.07451200 | -2.15633800 | -3.61463800 |
| H | -5.23907300 | 4.81661700  | 1.13417100  | C  | -1.61131900 | -0.19199000 | -3.14251400 |
| C | -2.40773600 | 5.63494100  | 3.00804900  | H  | -0.73624000 | 0.20680600  | -3.64325500 |
| H | -2.20256800 | 4.67292400  | 3.48694100  | H  | -2.36149700 | 0.52822900  | -2.82986300 |
| H | -1.44481200 | 6.10429300  | 2.78318200  | H  | 0.25035400  | 0.74626700  | -1.83544500 |
| H | -2.94199700 | 6.27317200  | 3.72123100  |    |             |             |             |
| C | -0.91940000 | 4.83773900  | -2.81134600 |    |             |             |             |
| H | -1.52467300 | 5.71248600  | -3.06559400 |    |             |             |             |
| C | 0.53120700  | 5.32461300  | -2.62632800 |    |             |             |             |
| H | 1.18294300  | 4.48992700  | -2.34423200 |    |             |             |             |
| H | 0.91460900  | 5.76025000  | -3.55633200 |    |             |             |             |
| H | 0.59144300  | 6.08251300  | -1.83953500 |    |             |             |             |
| C | -1.00631000 | 3.84523400  | -3.98252400 |    |             |             |             |
| H | -0.30489800 | 3.00883700  | -3.86773700 |    |             |             |             |
| H | -2.01466500 | 3.42872600  | -4.08861000 |    |             |             |             |
| H | -0.74577800 | 4.34989300  | -4.91885200 |    |             |             |             |
| C | 5.24670800  | -0.47705700 | 3.96635800  |    |             |             |             |
| H | 5.07312200  | -0.69669300 | 5.02616700  |    |             |             |             |
| C | 5.45992200  | 1.03818500  | 3.81365200  |    |             |             |             |
| H | 5.83659500  | 1.29057500  | 2.81437300  |    |             |             |             |
| H | 4.53973600  | 1.60751600  | 3.97222800  |    |             |             |             |
| H | 6.20959400  | 1.38106100  | 4.53457100  |    |             |             |             |
| C | 6.53728200  | -1.21476700 | 3.55036200  |    |             |             |             |

### 35-ts-R

B3LYP-D3 SCF energy: -4539.842756 a.u.

B3LYP-D3 enthalpy: -4537.935429 a.u.

B3LYP-D3 free energy: -4538.188528 a.u.

M06 SCF energy in solution: -4538.808461 a.u

Imaginary frequency: -743.30 cm<sup>-1</sup>

### Cartesian coordinates

| ATOM | X           | Y           | Z           |
|------|-------------|-------------|-------------|
| C    | 0.75161300  | -4.27697600 | -0.69477700 |
| C    | 0.17612400  | -3.09408100 | -0.18197000 |
| C    | -0.82361400 | -2.45034400 | -0.94224000 |
| C    | -1.25311800 | -2.99954100 | -2.15886500 |
| C    | -0.68147400 | -4.17741400 | -2.63299600 |
| C    | 0.32610100  | -4.81372700 | -1.91414100 |
| C    | 0.59062200  | -2.64911700 | 1.18614700  |
| C    | 1.27320600  | -1.44398300 | 1.45058700  |

|   |             |             |             |   |             |             |             |
|---|-------------|-------------|-------------|---|-------------|-------------|-------------|
| C | 0.28589100  | -3.50216900 | 2.27398600  | H | 6.38157200  | -3.88438600 | -5.09586100 |
| C | 1.66796200  | -1.11927700 | 2.75704400  | C | -6.78615800 | 2.45089500  | -3.18084700 |
| C | 0.68169300  | -3.17115000 | 3.57395500  | H | -7.17298700 | 2.92079200  | -4.09461700 |
| C | 1.38292200  | -1.99072600 | 3.80282500  | H | -7.59456300 | 2.47084500  | -2.43128300 |
| P | -1.53340500 | -0.87024400 | -0.32172100 | H | -5.96391500 | 3.06389800  | -2.80378200 |
| P | 1.63640500  | -0.26935400 | 0.07819300  | C | -7.29997700 | 0.17573000  | -3.96348700 |
| C | -2.14364800 | -1.30432700 | 1.33932900  | H | -8.01862700 | -0.12485200 | -3.17970100 |
| C | -1.89096900 | -0.51278400 | 2.45416600  | H | -7.86857700 | 0.62427500  | -4.78700000 |
| C | -2.92841900 | -2.45677000 | 1.46948200  | H | -6.81307800 | -0.72917700 | -4.34040400 |
| C | -2.44040900 | -0.82103900 | 3.70411900  | C | -2.89020000 | -3.02430000 | 6.01620500  |
| C | -3.47106800 | -2.81746500 | 2.70186100  | H | -2.21824300 | -2.31150200 | 6.52811800  |
| C | -3.23268100 | -1.98468000 | 3.82821600  | H | -3.46315200 | -3.55628300 | 6.78519900  |
| C | -3.00796000 | -0.44734300 | -1.31280000 | H | -2.26454300 | -3.75575600 | 5.49279200  |
| C | -4.20975900 | -0.17542000 | -0.65850600 | C | -4.85177200 | -1.58773700 | 5.67496400  |
| C | -2.91355900 | -0.19622800 | -2.68863400 | H | -5.46832300 | -1.14659700 | 4.88695800  |
| C | -5.31966700 | 0.32503500  | -1.34292200 | H | -5.49653000 | -2.22374400 | 6.29504100  |
| C | -4.00395600 | 0.29615100  | -3.41165000 | H | -4.47989600 | -0.76793100 | 6.31178700  |
| C | -5.21783100 | 0.57583100  | -2.73160600 | C | 6.47017800  | 1.80393900  | 1.03469900  |
| C | 2.62570500  | -1.30812100 | -1.06501100 | H | 6.92362200  | 2.71715700  | 1.42496300  |
| C | 2.40311600  | -1.32740100 | -2.44119000 | C | 6.82562200  | 1.73336500  | -0.46242300 |
| C | 3.63308700  | -2.12708700 | -0.53679300 | H | 6.47257200  | 0.80388700  | -0.92437300 |
| C | 3.14527900  | -2.14450300 | -3.29555400 | H | 6.39051500  | 2.57113300  | -1.01899900 |
| C | 4.42997100  | -2.92811400 | -1.36096400 | H | 7.91283400  | 1.77047700  | -0.59227000 |
| C | 4.16092100  | -2.96553900 | -2.75071500 | C | 7.08186700  | 0.61001900  | 1.79253400  |
| C | 2.74612800  | 0.99171100  | 0.80504000  | H | 8.16808900  | 0.57612300  | 1.64989100  |
| C | 4.13234900  | 0.95514600  | 0.63492900  | H | 6.88023800  | 0.66937300  | 2.86632800  |
| C | 2.17879000  | 2.00437900  | 1.59528400  | H | 6.66462100  | -0.33226100 | 1.42503100  |
| C | 4.96481400  | 1.88740300  | 1.26967900  | C | 2.34622200  | 3.97556100  | 3.17523500  |
| C | 2.97835700  | 2.93593800  | 2.25870300  | H | 3.02120200  | 4.83504900  | 3.20553800  |
| C | 4.38817600  | 2.85501400  | 2.12463600  | C | 0.97021800  | 4.46477200  | 2.69722100  |
| H | -2.05277700 | -2.53514400 | -2.72067500 | H | 0.19780500  | 3.69290100  | 2.78111400  |
| H | -1.02512000 | -4.60382800 | -3.57080900 | H | 0.64915400  | 5.31396900  | 3.31126100  |
| H | 2.20112400  | -0.19885000 | 2.95801000  | H | 0.99892000  | 4.78616200  | 1.65102500  |
| H | 1.70534800  | -1.74714200 | 4.81071400  | C | 2.26132500  | 3.41451700  | 4.60923300  |
| H | -1.25063800 | 0.35329500  | 2.35880700  | H | 1.61456100  | 2.52866700  | 4.63968400  |
| H | -3.10786700 | -3.07715000 | 0.59894000  | H | 3.25160600  | 3.13107100  | 4.97969300  |
| H | -4.27956900 | -0.32656900 | 0.41098300  | H | 1.84142500  | 4.16257300  | 5.29165500  |
| H | -1.97314600 | -0.36475300 | -3.20435800 | C | -3.86353500 | 0.53097300  | -4.90882000 |
| H | 1.60059800  | -0.73876400 | -2.86305700 | H | -4.76780900 | 1.05789400  | -5.22481300 |
| H | 3.80360000  | -2.13880700 | 0.53520300  | C | -3.79391600 | -0.80780500 | -5.66814700 |
| H | 4.57892200  | 0.19491900  | 0.00490600  | H | -2.90355100 | -1.37982400 | -5.37482400 |
| H | 1.10075700  | 2.05920800  | 1.70052100  | H | -4.67246900 | -1.42927300 | -5.46340500 |
| N | 5.16682500  | 3.77420700  | 2.89623300  | H | -3.74176200 | -0.63791100 | -6.74972900 |
| C | 6.06656800  | 3.24401100  | 3.90870800  | C | -2.65199700 | 1.41424100  | -5.25621000 |
| H | 5.62909600  | 2.34379900  | 4.35039500  | H | -2.67605200 | 1.69508900  | -6.31492700 |
| H | 7.07580800  | 2.99103900  | 3.54182100  | H | -2.63720400 | 2.33298400  | -4.65843900 |
| H | 6.18407700  | 3.98876000  | 4.70643300  | H | -1.70681300 | 0.88138300  | -5.09005800 |
| C | 5.62209000  | 4.98793700  | 2.23606500  | C | -6.57825200 | 0.61595800  | -0.53411200 |
| H | 4.81783700  | 5.41616100  | 1.63561600  | H | -7.39371600 | 0.82614700  | -1.22827200 |
| H | 5.90664900  | 5.72553700  | 2.99610500  | C | -7.01737100 | -0.59261600 | 0.31470700  |
| H | 6.49477200  | 4.83704100  | 1.57420100  | H | -6.28929300 | -0.82897100 | 1.09900300  |
| N | 4.86786700  | -3.81938400 | -3.65264500 | H | -7.97126500 | -0.37692800 | 0.80876800  |
| N | -6.29200500 | 1.11922400  | -3.50385200 | H | -7.14773500 | -1.48723400 | -0.30463300 |
| N | -3.80936300 | -2.40868600 | 5.07253100  | C | -6.36401300 | 1.86259200  | 0.34867500  |
| C | 4.78768700  | -5.25775700 | -3.45944600 | H | -5.55828600 | 1.69218400  | 1.07256200  |
| H | 4.91849500  | -5.75814100 | -4.42762500 | H | -6.08417600 | 2.73397900  | -0.25199300 |
| H | 5.53787000  | -5.67635400 | -2.76723400 | H | -7.27774900 | 2.10351700  | 0.90409300  |
| H | 3.79363700  | -5.51309100 | -3.07859900 | H | 0.76977800  | -5.72581100 | -2.29588200 |
| C | 6.12070500  | -3.31713600 | -4.19430400 | H | 0.44992900  | -3.82391100 | 4.40617500  |
| H | 6.00177500  | -2.26639000 | -4.47746600 | O | -0.40355400 | -4.63407100 | 1.96991700  |
| H | 6.97171200  | -3.38638900 | -3.49284900 | O | 1.72286400  | -4.85069200 | 0.06601400  |

|    |             |             |             |
|----|-------------|-------------|-------------|
| C  | -0.65805800 | -5.57526000 | 3.00597700  |
| H  | -1.32989800 | -5.15778600 | 3.76643100  |
| H  | -1.14750900 | -6.42248000 | 2.52437300  |
| H  | 0.27314000  | -5.91211300 | 3.47863200  |
| C  | 1.89836600  | -6.25986200 | -0.03727800 |
| H  | 2.39200200  | -6.54358000 | -0.97536500 |
| H  | 2.54183400  | -6.54327600 | 0.79662600  |
| H  | 0.93507800  | -6.77807400 | 0.04098900  |
| C  | 5.57878400  | -3.71126900 | -0.73135400 |
| H  | 6.19478300  | -4.11392400 | -1.53770900 |
| C  | 6.49123500  | -2.79918900 | 0.10809200  |
| H  | 5.97859600  | -2.43224000 | 1.00415600  |
| H  | 7.37662900  | -3.35142300 | 0.44215200  |
| H  | 6.82821600  | -1.93156700 | -0.46989000 |
| C  | 5.07019700  | -4.89455500 | 0.11106400  |
| H  | 4.37222500  | -4.55451700 | 0.88407700  |
| H  | 4.54552900  | -5.62157800 | -0.51399600 |
| H  | 5.90710900  | -5.40641200 | 0.59988900  |
| C  | 2.84104400  | -2.12032400 | -4.78728300 |
| H  | 3.48395300  | -2.87175500 | -5.25328200 |
| C  | 1.38046400  | -2.50430700 | -5.08346500 |
| H  | 0.67255000  | -1.79070900 | -4.64249000 |
| H  | 1.20368800  | -2.52330300 | -6.16498000 |
| H  | 1.14381900  | -3.49151400 | -4.67559100 |
| C  | 3.18455200  | -0.74820400 | -5.39786700 |
| H  | 2.54589800  | 0.04324400  | -4.98411100 |
| H  | 4.22650100  | -0.47160600 | -5.20157400 |
| H  | 3.03382000  | -0.76058700 | -6.48324200 |
| C  | -4.33842400 | -4.06688100 | 2.82192700  |
| H  | -4.11588200 | -4.52130100 | 3.79364000  |
| C  | -4.06935200 | -5.11050800 | 1.72461500  |
| H  | -4.47579900 | -4.79205800 | 0.75670800  |
| H  | -2.99994100 | -5.29681000 | 1.58777600  |
| H  | -4.55964100 | -6.05558700 | 1.98188100  |
| C  | -5.83420800 | -3.69123500 | 2.82502200  |
| H  | -6.10613100 | -3.19558100 | 1.88502100  |
| H  | -6.45540400 | -4.58897200 | 2.92578800  |
| H  | -6.07501000 | -3.01793300 | 3.65065200  |
| C  | -2.23971900 | 0.17186200  | 4.84601900  |
| H  | -2.53018500 | -0.31122000 | 5.78061800  |
| C  | -0.78090800 | 0.62872700  | 5.01717800  |
| H  | -0.41524900 | 1.17418700  | 4.13985500  |
| H  | -0.70149700 | 1.30503500  | 5.87557400  |
| H  | -0.11567900 | -0.22208300 | 5.18485800  |
| C  | -3.16158500 | 1.39138300  | 4.63215900  |
| H  | -2.89464000 | 1.91834700  | 3.70861900  |
| H  | -4.21107900 | 1.08917100  | 4.55352800  |
| H  | -3.06960700 | 2.09457700  | 5.46819500  |
| Rh | -0.17206900 | 0.90793100  | -0.69532600 |
| C  | -2.45605800 | 3.80399800  | -0.41257900 |
| C  | -3.07640100 | 3.51659300  | -1.63916000 |
| C  | -3.56664900 | 4.55226900  | -2.43812500 |
| C  | -3.47348500 | 5.88013600  | -2.01097100 |
| C  | -2.88770900 | 6.16429500  | -0.77511900 |
| C  | -2.37571400 | 5.13431100  | 0.02019000  |
| H  | -3.16894200 | 2.48641300  | -1.96737800 |
| H  | -4.02406600 | 4.31831600  | -3.39640700 |
| H  | -3.85908800 | 6.68363900  | -2.63169400 |
| H  | -2.81912900 | 7.19246900  | -0.42924000 |
| H  | -1.90388200 | 5.36420200  | 0.97106400  |
| Se | -1.78873700 | 2.36064400  | 0.72226400  |

|   |             |            |             |
|---|-------------|------------|-------------|
| C | 3.52720400  | 4.34314100 | -1.00212500 |
| C | 2.60805600  | 3.42170000 | -1.48592100 |
| C | 1.24873900  | 3.76389800 | -1.63331900 |
| C | 0.83861600  | 5.06420400 | -1.27701000 |
| C | 1.75057800  | 5.99831100 | -0.79639200 |
| C | 3.08236500  | 5.62119300 | -0.67218000 |
| H | 4.57186100  | 4.08836200 | -0.87077400 |
| H | 2.95147600  | 2.42095000 | -1.72540300 |
| H | -0.20306000 | 5.34401900 | -1.38615400 |
| H | 1.44931800  | 7.00457900 | -0.52639200 |
| F | 3.97333200  | 6.51933300 | -0.20433600 |
| C | 0.25201100  | 2.85819800 | -2.20274400 |
| H | -0.76082300 | 3.24401100 | -2.25098900 |
| C | 0.53138100  | 1.70890600 | -2.95335000 |
| H | -0.22310000 | 1.38104500 | -3.66292000 |
| H | 1.55796900  | 1.48398000 | -3.23103700 |
| H | 0.34369300  | 0.38781000 | -2.13120300 |

### 36-R

B3LYP-D3 SCF energy: -4539.874177 a.u.

B3LYP-D3 enthalpy: -4537.961271 a.u.

B3LYP-D3 free energy: -4538.214852 a.u.

M06 SCF energy in solution: -4538.839453 a.u.

#### Cartesian coordinates

| ATOM | X           | Y           | Z           |
|------|-------------|-------------|-------------|
| C    | -0.18579700 | 3.06595800  | -2.55693000 |
| C    | -0.45320100 | 1.88157400  | -1.83818700 |
| C    | -1.13642100 | 1.97898700  | -0.60847700 |
| C    | -1.54215800 | 3.23275600  | -0.12804700 |
| C    | -1.25628900 | 4.38775600  | -0.85216300 |
| C    | -0.57505000 | 4.31350100  | -2.06298900 |
| C    | -0.06089600 | 0.59536600  | -2.50022000 |
| C    | 1.01740900  | -0.21147400 | -2.07471200 |
| C    | -0.75877000 | 0.23269600  | -3.67627200 |
| C    | 1.40490900  | -1.32674900 | -2.83567900 |
| C    | -0.38373400 | -0.89760400 | -4.40959100 |
| C    | 0.70615300  | -1.65860600 | -3.99229000 |
| P    | -1.66303300 | 0.40863200  | 0.20087100  |
| P    | 1.73797700  | 0.10513800  | -0.40075400 |
| C    | -2.89624600 | -0.14452600 | -1.05926000 |
| C    | -2.98785400 | -1.42552600 | -1.59091600 |
| C    | -3.83722100 | 0.81923300  | -1.44755100 |
| C    | -4.03722900 | -1.78879600 | -2.44841400 |
| C    | -4.89410700 | 0.50111100  | -2.29696600 |
| C    | -5.02202600 | -0.82939800 | -2.76927500 |
| C    | -2.71753900 | 0.80705100  | 1.64236200  |
| C    | -3.90068700 | 0.07800200  | 1.79994400  |
| C    | -2.37854400 | 1.75443900  | 2.61541700  |
| C    | -4.74957100 | 0.28048800  | 2.89155100  |
| C    | -3.21032200 | 2.00251300  | 3.71126700  |
| C    | -4.40475700 | 1.25260800  | 3.85824900  |
| C    | 2.21737400  | 1.87102800  | -0.43675300 |
| C    | 1.95017900  | 2.71074900  | 0.64122400  |
| C    | 2.97595700  | 2.35462600  | -1.50928500 |
| C    | 2.44852800  | 4.01630000  | 0.68763600  |
| C    | 3.49481500  | 3.65240800  | -1.50391400 |
| C    | 3.22398500  | 4.49411700  | -0.39496300 |
| C    | 3.35807900  | -0.75100000 | -0.26769400 |
| C    | 4.47106500  | -0.02011400 | 0.15435500  |
| C    | 3.49151800  | -2.14078800 | -0.43296800 |

|   |             |             |             |   |             |             |             |
|---|-------------|-------------|-------------|---|-------------|-------------|-------------|
| C | 5.71010500  | -0.62818300 | 0.38457300  | C | 4.91071200  | -4.24631800 | -0.64136800 |
| C | 4.73587200  | -2.76667300 | -0.31085900 | H | 5.61823000  | -4.66436500 | 0.08044000  |
| C | 5.86330400  | -1.99733100 | 0.08621000  | C | 3.61882000  | -5.06756600 | -0.56422000 |
| H | -2.11755200 | 3.31629500  | 0.78289400  | H | 2.92216500  | -4.80393700 | -1.36572300 |
| H | -1.58041400 | 5.35282800  | -0.47380200 | H | 3.84978200  | -6.13228900 | -0.67735400 |
| H | 2.25682200  | -1.92358600 | -2.54011000 | H | 3.09226300  | -4.93557900 | 0.38480500  |
| H | 1.01214800  | -2.51978400 | -4.57960400 | C | 5.53676400  | -4.39499300 | -2.04410300 |
| H | -2.26282900 | -2.17470900 | -1.31636100 | H | 4.86893500  | -3.97586100 | -2.80754100 |
| H | -3.75893800 | 1.82943900  | -1.06372500 | H | 6.49851100  | -3.88102100 | -2.10708100 |
| H | -4.17379700 | -0.66076900 | 1.05681500  | H | 5.69783800  | -5.45334900 | -2.28009800 |
| H | -1.47287500 | 2.33995400  | 2.51242900  | C | -2.83962200 | 3.10538800  | 4.69386000  |
| H | 1.33020600  | 2.35388400  | 1.45100600  | H | -3.58280700 | 3.06702100  | 5.49431100  |
| H | 3.17432500  | 1.70489500  | -2.35596400 | C | -2.93546000 | 4.48793300  | 4.01950800  |
| H | 4.37785400  | 1.04258600  | 0.33905600  | H | -2.20937300 | 4.58374700  | 3.20168500  |
| H | 2.61732800  | -2.74317900 | -0.65476600 | H | -3.93500000 | 4.65864500  | 3.60409900  |
| N | 7.12165200  | -2.67326400 | 0.17494600  | H | -2.72688000 | 5.28459200  | 4.74288700  |
| C | 8.21963000  | -2.19211000 | -0.65166100 | C | -1.45044600 | 2.89893400  | 5.32261700  |
| H | 7.82485800  | -1.83531100 | -1.60741000 | H | -1.27893100 | 3.64149400  | 6.11007800  |
| H | 8.81568200  | -1.37864200 | -0.20436200 | H | -1.35765800 | 1.90221200  | 5.76827600  |
| H | 8.90321300  | -3.02581400 | -0.85685200 | H | -0.64618900 | 3.01734000  | 4.58696700  |
| C | 7.50629700  | -3.18137700 | 1.48362000  | C | -6.01624400 | -0.56640800 | 2.96511400  |
| H | 6.65825000  | -3.68774800 | 1.95187900  | H | -6.59466500 | -0.25188300 | 3.83458000  |
| H | 8.31259800  | -3.91474100 | 1.36424000  | C | -6.90851600 | -0.35179000 | 1.72682900  |
| H | 7.86618000  | -2.39859400 | 2.17711900  | H | -6.40978400 | -0.67557000 | 0.80569200  |
| N | 3.70621300  | 5.83942800  | -0.30892600 | H | -7.83591100 | -0.92766600 | 1.82380200  |
| N | -5.22167800 | 1.53481900  | 5.00028400  | H | -7.17295600 | 0.70451600  | 1.60682700  |
| N | -6.19095500 | -1.13307900 | -3.54348300 | C | -5.67140300 | -2.05661700 | 3.15295500  |
| C | 3.18296700  | 6.81746700  | -1.24903900 | H | -5.09462700 | -2.44425800 | 2.30528900  |
| H | 3.26075400  | 7.81914300  | -0.80731700 | H | -5.07418500 | -2.21166400 | 4.05822300  |
| H | 3.69807500  | 6.84439500  | -2.22468200 | H | -6.58742300 | -2.65210200 | 3.24047100  |
| H | 2.12370400  | 6.60879000  | -1.43016100 | H | -0.35847500 | 5.21487900  | -2.62494700 |
| C | 5.09150300  | 6.01855300  | 0.09568100  | H | -0.92220600 | -1.17962600 | -5.30530100 |
| H | 5.31935300  | 5.34088100  | 0.92476400  | O | -1.78784800 | 1.04687200  | -4.02305800 |
| H | 5.82704600  | 5.83138100  | -0.70750500 | O | 0.46396000  | 2.91190800  | -3.74365000 |
| H | 5.23651500  | 7.04682400  | 0.44865000  | C | -2.61984000 | 0.67007800  | -5.11426900 |
| C | -5.28384000 | 0.51846300  | 6.04087800  | H | -3.06222300 | -0.31774100 | -4.94674900 |
| H | -5.62601900 | 0.98283300  | 6.97374400  | H | -3.41493200 | 1.41571600  | -5.14909600 |
| H | -5.95732200 | -0.32795400 | 5.82122800  | H | -2.06726900 | 0.67882700  | -6.06255300 |
| H | -4.28062800 | 0.11541800  | 6.21181500  | C | 0.12927100  | 3.80894400  | -4.80102000 |
| C | -6.44667400 | 2.28377100  | 4.76150600  | H | 0.56370300  | 4.80347500  | -6.64966200 |
| H | -7.27183300 | 1.68961700  | 4.33059400  | H | 0.55654900  | 3.37406300  | -5.70625400 |
| H | -6.79947400 | 2.70670600  | 5.70977600  | H | -0.95903700 | 3.89026200  | -4.90449500 |
| H | -6.23682300 | 3.11342000  | 4.07863300  | C | 4.33108000  | 4.11611100  | -2.69418600 |
| C | -6.02105900 | -1.25380300 | -4.98176300 | H | 4.80469500  | 5.06257600  | -2.42820200 |
| H | -5.49828600 | -2.17074600 | -5.30898700 | C | 5.46599700  | 3.13435700  | -3.03805300 |
| H | -7.00643100 | -1.24296100 | -5.46214800 | H | 5.08286000  | 2.16084500  | -3.36406500 |
| H | -5.45818800 | -0.39200200 | -5.35659100 | H | 6.07450800  | 3.53758100  | -3.85529700 |
| C | -7.16828000 | -2.02863800 | -2.93913900 | H | 6.12098800  | 2.96611000  | -2.17800700 |
| H | -7.26679000 | -1.78788300 | -1.87611800 | C | 3.43842500  | 4.36882400  | -3.92268100 |
| H | -8.14351700 | -1.86792000 | -3.41497400 | H | 2.92307800  | 3.45100500  | -4.22232300 |
| H | -6.92736100 | -3.10223600 | -3.02185700 | H | 2.67496300  | 5.12218200  | -3.70180300 |
| C | 6.82196700  | 0.22857100  | 0.98371200  | H | 4.03749600  | 4.72602800  | -4.76821700 |
| H | 7.68353000  | -0.41118900 | 1.17889600  | C | 2.18913100  | 4.86441400  | 1.92502100  |
| C | 6.39509600  | 0.82689400  | 2.33971500  | H | 2.56456300  | 5.86717600  | 1.70448900  |
| H | 5.54876600  | 1.51594300  | 2.23038300  | C | 0.69305300  | 4.97755600  | 2.26249800  |
| H | 6.10299700  | 0.04434000  | 3.04927700  | H | 0.25912200  | 4.00204000  | 2.51356200  |
| H | 7.22382400  | 1.38961200  | 2.78400900  | H | 0.54556500  | 5.63245200  | 3.12860000  |
| C | 7.26689700  | 1.34209700  | 0.01864400  | H | 0.12535400  | 5.38398200  | 1.42012100  |
| H | 8.10731200  | 1.90556500  | 0.43966700  | C | 2.97901700  | 4.31173500  | 3.12835400  |
| H | 7.57779400  | 0.93196000  | -0.94800800 | H | 2.63002600  | 3.30805700  | 3.40310100  |
| H | 6.44828700  | 2.04818900  | -0.16301000 | H | 4.04979500  | 4.24335900  | 2.90454500  |



|    |             |             |             |   |             |             |             |
|----|-------------|-------------|-------------|---|-------------|-------------|-------------|
| H  | 2.85502800  | 4.95962100  | 4.00367500  | C | 0.67921800  | -2.71756900 | -1.13091500 |
| C  | -5.91987800 | 1.56835500  | -2.65552800 | C | 1.31050400  | -2.23101300 | 0.03081400  |
| H  | -6.40540100 | 1.24926300  | -3.58224400 | C | 1.63344000  | -3.11222700 | 1.07426600  |
| C  | -5.28962800 | 2.95224600  | -2.89054200 | C | 1.34125000  | -4.46893900 | 0.96244600  |
| H  | -4.92329500 | 3.40258800  | -1.96015000 | C | 0.72894800  | -4.97022800 | -0.18256300 |
| H  | -4.44217300 | 2.89823500  | -3.58372700 | C | 0.29114300  | -1.87199200 | -2.30174000 |
| H  | -6.03512200 | 3.63742800  | -3.30878300 | C | -0.81017200 | -0.99035000 | -2.27837100 |
| C  | -7.01036000 | 1.64235300  | -1.56938300 | C | 0.98924200  | -2.05798200 | -3.51711200 |
| H  | -6.57255900 | 1.91902800  | -0.60226100 | C | -1.20482700 | -0.33080100 | -3.45391000 |
| H  | -7.76866400 | 2.39056300  | -1.82838200 | C | 0.62496700  | -1.34863800 | -4.66622200 |
| H  | -7.51043700 | 0.67611300  | -1.44810600 | C | -0.48146000 | -0.50438700 | -4.62909700 |
| C  | -4.07934500 | -3.22511100 | -2.96142500 | P | 1.70288900  | -0.43423000 | 0.20876600  |
| H  | -4.95207400 | -3.33446300 | -3.60656900 | P | -1.60074200 | -0.61478700 | -0.65465700 |
| C  | -2.84422500 | -3.55573400 | -3.81993800 | C | 2.72023700  | -0.05643000 | -1.25043200 |
| H  | -1.91809400 | -3.47770600 | -3.24194200 | C | 2.56704400  | 1.13049800  | -1.95726400 |
| H  | -2.91237900 | -4.58023500 | -4.20332300 | C | 3.70219300  | -0.97639600 | -1.64536400 |
| H  | -2.76479000 | -2.87594300 | -4.67603000 | C | 3.35666600  | 1.41105400  | -3.08026800 |
| C  | -4.23391600 | -4.22923700 | -1.80245400 | C | 4.56626000  | -0.69471000 | -2.70201200 |
| H  | -3.36737300 | -4.20714400 | -1.13355600 | C | 4.38402200  | 0.51006900  | -3.43409700 |
| H  | -5.12485400 | -4.00553800 | -1.20540100 | C | 2.81585400  | -0.36378700 | 1.66612600  |
| H  | -4.32968900 | -5.24900200 | -2.19268000 | C | 4.20191000  | -0.30662200 | 1.52237700  |
| Rh | 0.03671200  | -1.01935800 | 0.80756300  | C | 2.27506500  | -0.37399500 | 2.95636200  |
| C  | -0.92871900 | -4.11975300 | 0.39278500  | C | 5.05156900  | -0.26037200 | 2.63405800  |
| C  | -0.88746500 | -5.42060900 | 0.91723200  | C | 3.08560800  | -0.33280300 | 4.09042200  |
| C  | -0.29125000 | -6.45532400 | 0.19344600  | C | 4.49296400  | -0.28232900 | 3.93219000  |
| C  | 0.27924900  | -6.20917400 | -1.05836200 | C | -2.12408900 | -2.20407900 | 0.06667400  |
| C  | 0.25593800  | -4.91457600 | -1.57853900 | C | -1.95792900 | -2.44246200 | 1.43010400  |
| C  | -0.33920200 | -3.87627800 | -0.85998800 | C | -2.85662600 | -3.11226800 | -0.70331500 |
| H  | -1.33222300 | -5.62470400 | 1.88720000  | C | -2.51807200 | -3.56405200 | 2.04561200  |
| H  | -0.27661100 | -7.45933600 | 0.60915400  | C | -3.44644100 | -4.23950300 | -0.12440700 |
| H  | 0.73897500  | -7.01731400 | -1.61936600 | C | -3.26461000 | -4.47507900 | 1.26173600  |
| H  | 0.69259700  | -4.70422200 | -2.55146800 | C | -3.19288900 | 0.26322600  | -0.92492300 |
| H  | -0.35517800 | -2.88282200 | -1.29874900 | C | -4.29362800 | -0.13760100 | -0.16218200 |
| Se | -1.82748400 | -2.69633300 | 1.39641100  | C | -3.31982900 | 1.41328700  | -1.72110700 |
| C  | 3.98455100  | -2.34063200 | 2.89198300  | C | -5.49698900 | 0.57589700  | -0.16331800 |
| C  | 2.98299700  | -1.38659700 | 2.85762300  | C | -4.53677700 | 2.09320400  | -1.82957500 |
| C  | 1.61254400  | -1.75422800 | 2.82287500  | C | -5.62283700 | 1.70185000  | -1.00396500 |
| C  | 1.30800100  | -3.13858200 | 2.82779500  | H | 2.12397400  | -2.74743100 | 1.96757900  |
| C  | 2.30695300  | -4.10638100 | 2.82895700  | H | 1.59599500  | -5.14199600 | 1.77545400  |
| C  | 3.63067200  | -3.68836800 | 2.84862700  | H | -2.08819100 | 0.28974800  | -3.47137400 |
| H  | 5.02998700  | -2.06205900 | 2.91419700  | H | -0.78682100 | 0.01872300  | -5.53055300 |
| H  | 3.27083200  | -0.34327000 | 2.86953300  | H | 1.82075100  | 1.84876300  | -1.64867000 |
| H  | 0.27098100  | -3.44777900 | 2.83645900  | H | 3.79641500  | -1.91102000 | -1.10662400 |
| H  | 2.07107000  | -5.16434000 | 2.80656400  | H | 4.63981000  | -0.27386900 | 0.53307000  |
| F  | 4.60871100  | -4.61255200 | 2.80285200  | H | 1.19864500  | -0.39723300 | 3.08884100  |
| C  | 0.53286500  | -0.74104300 | 2.85575600  | H | -1.37718600 | -1.74850200 | 2.02690500  |
| H  | -0.37557500 | -1.10854000 | 3.33237400  | H | -2.98362700 | -2.92797500 | -1.76579100 |
| C  | 0.89020300  | 0.63656600  | 3.35159800  | H | -4.21786900 | -1.01482800 | 0.46776800  |
| H  | 1.08916200  | 0.59050300  | 4.43273200  | H | -2.46577400 | 1.79228400  | -2.26678300 |
| H  | 1.77542400  | 1.05137300  | 2.86982600  | N | -6.80874400 | 2.50312700  | -1.07092300 |
| H  | 0.06162300  | 1.32536400  | 3.20891400  | C | -7.95594000 | 1.92492600  | -1.75741300 |
|    |             |             |             | H | -7.62312500 | 1.45535900  | -2.68867300 |
|    |             |             |             | H | -8.50606100 | 1.16733200  | -1.17217000 |
|    |             |             |             | H | -8.66063500 | 2.72502800  | -2.01344700 |
|    |             |             |             | C | -7.11853300 | 3.32002600  | 0.09509900  |
|    |             |             |             | H | -6.19483900 | 3.75351300  | 0.49126900  |
|    |             |             |             | H | -7.77770200 | 4.14274700  | -0.20777900 |
|    |             |             |             | H | -7.61647600 | 2.77787900  | 0.91749400  |
|    |             |             |             | N | -3.81083600 | -5.61630000 | 1.93127100  |
|    |             |             |             | N | 5.28549900  | -0.23995300 | 5.12419900  |
|    |             |             |             | N | 5.28515700  | 0.74534600  | -4.52548000 |

**37**  
B3LYP-D3 SCF energy: -4539.853959 a.u.  
B3LYP-D3 enthalpy: -4537.945371 a.u.  
B3LYP-D3 free energy: -4538.202518 a.u.  
M06 SCF energy in solution: -4538.822559 a.u.

Cartesian coordinates

| ATOM | X          | Y           | Z           |
|------|------------|-------------|-------------|
| C    | 0.39894400 | -4.09849700 | -1.22320400 |

|   |             |             |             |    |             |             |             |
|---|-------------|-------------|-------------|----|-------------|-------------|-------------|
| C | -3.28542500 | -6.92646700 | 1.58198500  | H  | 6.52625200  | 0.86260400  | 0.44955200  |
| H | -3.44939700 | -7.61491600 | 2.42049700  | H  | 6.55739600  | 1.93183200  | 1.86059800  |
| H | -3.73648300 | -7.38318500 | 0.68392200  | H  | 8.02246900  | 1.05492600  | 1.37037800  |
| H | -2.20626600 | -6.84716600 | 1.41593300  | H  | 0.50333900  | -6.02751700 | -0.26158600 |
| C | -5.22262100 | -5.56082100 | 2.27727300  | H  | 1.17820600  | -1.46539000 | -5.58965300 |
| H | -5.45657300 | -4.57345300 | 2.68908400  | O  | 2.00449500  | -2.96149500 | -3.48609100 |
| H | -5.90731200 | -5.74598500 | 1.43011500  | O  | -0.22145900 | -4.50772900 | -2.36535000 |
| H | -5.43604200 | -6.30988100 | 3.04931900  | C  | 2.67151100  | -3.27032400 | -4.70431600 |
| C | 5.82765500  | 1.05702300  | 5.50108200  | H  | 3.23643800  | -2.40669200 | -5.07566600 |
| H | 6.11344500  | 1.03513200  | 6.55974100  | H  | 3.36669200  | -4.07637400 | -4.46910700 |
| H | 6.71433100  | 1.36621500  | 4.91902700  | H  | 1.96540300  | -3.61027500 | -5.47206100 |
| H | 5.05711300  | 1.82378500  | 5.37276700  | C  | 0.04192000  | -5.83075000 | -2.82537200 |
| C | 6.12138200  | -1.39188600 | 5.42573800  | H  | -0.46358500 | -6.58695300 | -2.21445900 |
| H | 7.08588200  | -1.41861900 | 4.88952700  | H  | -0.35604900 | -5.87782700 | -3.84059100 |
| H | 6.34059300  | -1.40301100 | 6.50071000  | H  | 1.12068700  | -6.02773300 | -2.83850600 |
| H | 5.57440200  | -2.30845700 | 5.18358900  | C  | -4.27600300 | -5.16169500 | -1.01224700 |
| C | 4.78193800  | 0.43597100  | -5.85394000 | H  | -4.77439000 | -5.89396700 | -0.37543100 |
| H | 4.06101100  | 1.17521200  | -6.24792900 | C  | -5.38380700 | -4.39525900 | -1.75963900 |
| H | 5.62229200  | 0.37918000  | -6.55621600 | H  | -4.97116400 | -3.67572400 | -2.47584400 |
| H | 4.28665300  | -0.54094200 | -5.84142800 | H  | -6.01297300 | -5.09494700 | -2.32115000 |
| C | 6.15834000  | 1.91080700  | -4.45535500 | H  | -6.02308800 | -3.84379900 | -1.06199000 |
| H | 6.45217700  | 2.08180200  | -3.41604600 | C  | -3.37499600 | -5.93379500 | -1.99278700 |
| H | 7.06684700  | 1.71343900  | -5.03878400 | H  | -2.80913400 | -5.24576800 | -2.62992200 |
| H | 5.71383800  | 2.84440200  | -4.83879700 | H  | -2.65412100 | -6.55401700 | -1.44912400 |
| C | -6.60218600 | 0.09333600  | 0.77037300  | H  | -3.97359100 | -6.58962500 | -2.63524500 |
| H | -7.48764600 | 0.70889500  | 0.60866500  | C  | -2.30089300 | -3.76889100 | 3.53826500  |
| C | -6.18163300 | 0.26627500  | 2.24353100  | H  | -2.92875700 | -4.61145700 | 3.83906300  |
| H | -5.31572400 | -0.36301400 | 2.48448200  | C  | -0.83615700 | -4.14571100 | 3.82881200  |
| H | -5.90983200 | 1.30525600  | 2.45991100  | H  | -0.15060200 | -3.35267700 | 3.50738900  |
| H | -7.00007700 | -0.02123400 | 2.91310500  | H  | -0.68498700 | -4.30963400 | 4.90197600  |
| C | -7.00280900 | -1.36552300 | 0.47777500  | H  | -0.55445800 | -5.06080700 | 3.29681700  |
| H | -7.84410100 | -1.66198900 | 1.11424300  | C  | -2.72389800 | -2.53392900 | 4.35541100  |
| H | -7.30282200 | -1.49205600 | -0.56824900 | H  | -2.08239900 | -1.66748800 | 4.14869400  |
| H | -6.17699700 | -2.05921500 | 0.67605300  | H  | -3.75829300 | -2.24448700 | 4.13565700  |
| C | -4.70793400 | 3.22896300  | -2.83514300 | H  | -2.64945800 | -2.74418800 | 5.42813000  |
| H | -5.77315300 | 3.25606800  | -3.08188300 | C  | 5.71380000  | -1.64672500 | -3.03083600 |
| C | -4.36224800 | 4.60068700  | -2.22848800 | H  | 5.77528500  | -1.72566200 | -4.12235100 |
| H | -3.30758400 | 4.65171800  | -1.93773600 | C  | 5.53331600  | -3.05995900 | -2.45177300 |
| H | -4.54834700 | 5.39894700  | -2.95656800 | H  | 5.67021800  | -3.06716500 | -1.36301000 |
| H | -4.97821100 | 4.80264400  | -1.34654700 | H  | 4.54273900  | -3.47404800 | -2.66138400 |
| C | -3.93228700 | 2.99406700  | -4.14252400 | H  | 6.28794000  | -3.73224800 | -2.87362900 |
| H | -2.84636900 | 3.06111200  | -4.00448800 | C  | 7.05500100  | -1.06347100 | -2.53780600 |
| H | -4.15610900 | 2.00951600  | -4.56905000 | H  | 7.03515800  | -0.92254400 | -1.45015300 |
| H | -4.20731400 | 3.75475400  | -4.88114800 | H  | 7.87841800  | -1.74805200 | -2.77281500 |
| C | 2.42411700  | -0.30357700 | 5.46073000  | H  | 7.26874800  | -0.10124200 | -3.00606600 |
| H | 3.22719100  | -0.36279400 | 6.20024500  | C  | 3.02970000  | 2.66798200  | -3.88002900 |
| C | 1.48314600  | -1.50282500 | 5.67538200  | H  | 3.72581300  | 2.73963800  | -4.71606900 |
| H | 0.62302400  | -1.47473100 | 4.99453500  | C  | 1.61649200  | 2.56705800  | -4.48768300 |
| H | 2.00462000  | -2.45313600 | 5.51436200  | H  | 0.85122800  | 2.50147900  | -3.70788700 |
| H | 1.08911100  | -1.49971600 | 6.69809000  | H  | 1.39974300  | 3.45213000  | -5.09719700 |
| C | 1.67509100  | 1.02771100  | 5.66902700  | H  | 1.52277700  | 1.67726200  | -5.11949300 |
| H | 1.23445400  | 1.07026400  | 6.67188800  | C  | 3.18723800  | 3.94580200  | -3.03368800 |
| H | 2.34835300  | 1.88406700  | 5.55289800  | H  | 2.48896600  | 3.96367500  | -2.19039800 |
| H | 0.86499000  | 1.14489700  | 4.93701200  | H  | 4.20317500  | 4.02752500  | -2.63203000 |
| C | 6.55357400  | -0.19565300 | 2.37654700  | H  | 2.98866500  | 4.83308600  | -3.64558400 |
| H | 7.06011600  | -0.03381400 | 3.32906700  | Rh | -0.20666200 | 0.80246800  | 0.60055900  |
| C | 7.06335000  | -1.53048600 | 1.79861700  | C  | 0.64564100  | 3.82260600  | 0.15407500  |
| H | 6.58715300  | -1.74730400 | 0.83441600  | C  | 0.82656400  | 5.21035100  | 0.24935200  |
| H | 8.14671200  | -1.49348900 | 1.63671900  | C  | 0.30557500  | 6.05956500  | -0.72536500 |
| H | 6.84583800  | -2.36531400 | 2.47373800  | C  | -0.41991500 | 5.54671800  | -1.80586300 |
| C | 6.93259800  | 0.98378100  | 1.46051600  | C  | -0.60872700 | 4.16893700  | -1.91041900 |

|    |             |             |             |
|----|-------------|-------------|-------------|
| C  | -0.06891300 | 3.31689200  | -0.94569000 |
| H  | 1.36536300  | 5.62350600  | 1.09629000  |
| H  | 0.45865700  | 7.13152000  | -0.63531200 |
| H  | -0.82118700 | 6.21167700  | -2.56472300 |
| H  | -1.14121300 | 3.75447400  | -2.76032100 |
| H  | -0.16586700 | 2.23599300  | -1.11497600 |
| Se | 1.36659700  | 2.61275700  | 1.49666000  |
| C  | -1.01534100 | 5.50674300  | 3.28955300  |
| C  | -1.28184100 | 4.17338200  | 3.00093900  |
| C  | -2.09792200 | 3.82365500  | 1.90474800  |
| C  | -2.64991300 | 4.85585500  | 1.12114500  |
| C  | -2.39980000 | 6.19179600  | 1.40285700  |
| C  | -1.57339900 | 6.49462200  | 2.48157400  |
| H  | -0.38397000 | 5.79407400  | 4.12325200  |
| H  | -0.84881200 | 3.40314400  | 3.62715400  |
| H  | -3.27866200 | 4.59811200  | 0.27696700  |
| H  | -2.81277800 | 6.99297900  | 0.80026300  |
| F  | -1.30602700 | 7.78350800  | 2.75372600  |
| C  | -2.43139700 | 2.45125700  | 1.56005100  |
| H  | -3.09777000 | 2.33882300  | 0.70910300  |
| C  | -2.08551300 | 1.31505300  | 2.23538900  |
| H  | -1.52318100 | 1.35307400  | 3.16316100  |
| H  | -2.61468800 | 0.39166400  | 2.03087300  |
| H  | -0.24657000 | -0.17861700 | 1.76063000  |

### 38-ts-S

B3LYP-D3 SCF energy: -4539.828928 a.u.

B3LYP-D3 enthalpy: -4537.923725 a.u.

B3LYP-D3 free energy: -4538.169015 a.u.

M06 SCF energy in solution: -4538.804658 a.u.

Imaginary frequency: -254.87 cm<sup>-1</sup>

#### Cartesian coordinates

| ATOM | X           | Y           | Z           |
|------|-------------|-------------|-------------|
| C    | -0.38556700 | 2.19918100  | 3.52823600  |
| C    | 0.00414800  | 1.23505400  | 2.57248000  |
| C    | 0.70728100  | 1.65948500  | 1.43099000  |
| C    | 0.97201600  | 3.02531600  | 1.24195200  |
| C    | 0.57315900  | 3.95854500  | 2.19399200  |
| C    | -0.09596100 | 3.55294300  | 3.34538100  |
| C    | -0.36641400 | -0.18277200 | 2.86865900  |
| C    | -1.37433000 | -0.89516700 | 2.18121000  |
| C    | 0.25631100  | -0.78862900 | 3.98596000  |
| C    | -1.78296700 | -2.15091000 | 2.66321500  |
| C    | -0.13845700 | -2.05203200 | 4.43370200  |
| C    | -1.17793700 | -2.71057600 | 3.78230800  |
| P    | 1.30173400  | 0.42495000  | 0.18994000  |
| P    | -1.95150100 | -0.30543500 | 0.52518600  |
| C    | 2.33316300  | -0.68884900 | 1.21306600  |
| C    | 2.10730900  | -2.06272600 | 1.14690300  |
| C    | 3.33742200  | -0.21064600 | 2.06124200  |
| C    | 2.90262400  | -2.97873300 | 1.84346800  |
| C    | 4.19103600  | -1.08683400 | 2.73301200  |
| C    | 3.98716800  | -2.48647100 | 2.60357000  |
| C    | 2.32568800  | 1.46804600  | -0.91741900 |
| C    | 3.54527100  | 2.01467300  | -0.52164000 |
| C    | 1.79892600  | 1.82390100  | -2.16302200 |
| C    | 4.23196600  | 2.92932400  | -1.32833700 |
| C    | 2.47335900  | 2.69298900  | -3.02183800 |
| C    | 3.68767800  | 3.27851800  | -2.58538500 |
| C    | -2.36918100 | 1.46413400  | 0.68861700  |

|   |             |             |             |
|---|-------------|-------------|-------------|
| C | -2.04547300 | 2.34830300  | -0.33908100 |
| C | -3.20030500 | 1.88945800  | 1.72809400  |
| C | -2.54900800 | 3.65240100  | -0.35323700 |
| C | -3.73283400 | 3.18112000  | 1.74607100  |
| C | -3.39924400 | 4.07287900  | 0.69688500  |
| C | -3.62580200 | -0.99100500 | 0.11980100  |
| C | -4.54515300 | -0.11621000 | -0.47422400 |
| C | -3.97179900 | -2.35086000 | 0.16993500  |
| C | -5.78108400 | -0.54537300 | -0.96770300 |
| C | -5.21129200 | -2.81790300 | -0.27938500 |
| C | -6.13502100 | -1.90639400 | -0.84811700 |
| H | 1.49500000  | 3.36546100  | 0.35935000  |
| H | 0.78899500  | 5.01164800  | 2.03770300  |
| H | -2.59759100 | -2.68248100 | 2.19759600  |
| H | -1.51274600 | -3.67716100 | 4.14733500  |
| H | 1.31928000  | -2.44338700 | 0.50520600  |
| H | 3.45696700  | 0.85686400  | 2.19419100  |
| H | 3.97555200  | 1.74254700  | 0.43244000  |
| H | 0.87044000  | 1.37161900  | -2.48297900 |
| H | -1.38368600 | 2.01887900  | -1.13452500 |
| H | -3.44536200 | 1.19828300  | 2.52929400  |
| H | -4.30439900 | 0.93391200  | -0.56521000 |
| H | -3.26737400 | -3.08431400 | 0.54244600  |
| N | -7.39348500 | -2.42658600 | -1.28969400 |
| C | -8.57481200 | -2.03592000 | -0.53373100 |
| H | -8.34868300 | -2.07744900 | 0.53630300  |
| H | -8.95696200 | -1.02546600 | -0.76179400 |
| H | -9.38161700 | -2.75017500 | -0.73725700 |
| C | -7.57201900 | -2.58357000 | -2.72555500 |
| H | -6.67228000 | -3.03668700 | -3.15486500 |
| H | -8.41347900 | -3.26161800 | -2.91101800 |
| H | -7.77207700 | -1.64337500 | -3.26952600 |
| N | -3.88184200 | 5.42038300  | 0.64661600  |
| N | 4.32082100  | 4.19927600  | -3.48520100 |
| N | 4.92889100  | -3.34260400 | 3.26493600  |
| C | -3.37390400 | 6.35379500  | 1.63962600  |
| H | -3.47082000 | 7.37714700  | 1.25585500  |
| H | -3.88598600 | 6.31420000  | 2.61701200  |
| H | -2.31082100 | 6.15389600  | 1.80784500  |
| C | -5.26080300 | 5.61130700  | 0.22601700  |
| H | -5.46694900 | 4.97356900  | -0.64017600 |
| H | -6.01310100 | 5.38134500  | 1.00172500  |
| H | -5.40442000 | 6.65499200  | -0.07889500 |
| C | 5.44623600  | 3.68440600  | -4.24907200 |
| H | 5.67001500  | 4.37613200  | -5.06984800 |
| H | 6.37115300  | 3.54632800  | -3.66056700 |
| H | 5.17930700  | 2.71686800  | -4.68499700 |
| C | 4.42630700  | 5.59441700  | -3.08302300 |
| H | 5.30436100  | 5.83126100  | -2.45878900 |
| H | 4.48001800  | 6.22361500  | -3.98085200 |
| H | 3.52949800  | 5.87912100  | -2.52448800 |
| C | 4.51549600  | -3.89570300 | 4.54419100  |
| H | 3.75268400  | -4.69199500 | 4.46924300  |
| H | 5.38947800  | -4.31597200 | 5.05565600  |
| H | 4.10979700  | -3.09851600 | 5.17653300  |
| C | 5.74279000  | -4.22762900 | 2.44114600  |
| H | 5.98837000  | -3.72358000 | 1.50177200  |
| H | 6.68180600  | -4.44283100 | 2.96671900  |
| H | 5.27098900  | -5.19274100 | 2.19321000  |
| C | -6.67282700 | 0.50072300  | -1.63036800 |
| H | -7.59499700 | 0.01675500  | -1.95383600 |

|   |             |             |             |    |             |             |             |
|---|-------------|-------------|-------------|----|-------------|-------------|-------------|
| C | -5.99683400 | 1.08141300  | -2.88864300 | H  | -2.77256900 | 5.48555700  | -1.38120300 |
| H | -5.07682200 | 1.62245600  | -2.63391800 | C  | -0.67901900 | 5.03573700  | -1.30090900 |
| H | -5.73877400 | 0.28892200  | -3.60047000 | H  | 0.00564800  | 4.18545600  | -1.40310800 |
| H | -6.66735100 | 1.78657700  | -3.39270000 | H  | -0.40560900 | 5.78135700  | -2.05583900 |
| C | -7.06072400 | 1.62223200  | -0.64785300 | H  | -0.51988500 | 5.47608700  | -0.31050900 |
| H | -7.74519300 | 2.33042900  | -1.12857800 | C  | -2.38460900 | 3.98276500  | -2.86681000 |
| H | -7.55670300 | 1.21568100  | 0.24024300  | H  | -1.74238800 | 3.11146600  | -3.04671700 |
| H | -6.18038700 | 2.18358700  | -0.31288100 | H  | -3.42667900 | 3.66271100  | -2.98538800 |
| C | -5.54354900 | -4.29716500 | -0.13910800 | H  | -2.16270000 | 4.71497200  | -3.65104600 |
| H | -6.50838000 | -4.44536500 | -0.63063700 | C  | 5.37641800  | -0.54528500 | 3.52566300  |
| C | -4.50808900 | -5.19930500 | -0.83335100 | H  | 5.51763800  | -1.19241500 | 4.39768400  |
| H | -3.53436200 | -5.16848700 | -0.33039800 | C  | 5.18381500  | 0.89595200  | 4.02458200  |
| H | -4.84537100 | -6.24167600 | -0.82042900 | H  | 5.22961300  | 1.62151500  | 3.20269200  |
| H | -4.35267100 | -4.90496000 | -1.87747500 | H  | 4.22328900  | 1.03169400  | 4.53342800  |
| C | -5.70451300 | -4.68116800 | 1.34392800  | H  | 5.98432300  | 1.15654500  | 4.72490000  |
| H | -4.76710800 | -4.53523500 | 1.89670400  | C  | 6.65987100  | -0.63793500 | 2.67358200  |
| H | -6.47616200 | -4.07364100 | 1.82922900  | H  | 6.54935800  | -0.05717700 | 1.74990900  |
| H | -5.98877300 | -5.73523600 | 1.44017900  | H  | 7.51965800  | -0.24112800 | 3.22597700  |
| C | 1.92679000  | 2.98366700  | -4.41854500 | H  | 6.87784200  | -1.67389100 | 2.40287500  |
| H | 2.79002200  | 3.01223100  | -5.09265300 | C  | 2.59894800  | -4.46498700 | 1.67270700  |
| C | 1.24889000  | 4.36477200  | -4.49718600 | H  | 3.22393400  | -5.02805600 | 2.36804700  |
| H | 0.36009800  | 4.39353400  | -3.85991400 | C  | 1.13712000  | -4.79986400 | 2.02024400  |
| H | 1.92834400  | 5.15881000  | -4.18052800 | H  | 0.43393700  | -4.29740900 | 1.34640600  |
| H | 0.93309900  | 4.57567300  | -5.52581900 | H  | 0.96875900  | -5.87995400 | 1.93454900  |
| C | 0.96428700  | 1.90155800  | -4.93851200 | H  | 0.89118900  | -4.49042400 | 3.04027600  |
| H | 0.74134300  | 2.08224300  | -5.99553200 | C  | 2.94091400  | -4.92835600 | 0.24174000  |
| H | 1.38035700  | 0.89242100  | -4.84124700 | H  | 2.34099600  | -4.39146900 | -0.50213100 |
| H | 0.00660500  | 1.92170200  | -4.40123800 | H  | 3.99564400  | -4.75056300 | 0.00702500  |
| C | 5.50325900  | 3.56466300  | -0.77338000 | H  | 2.74486900  | -6.00108200 | 0.12692000  |
| H | 6.01879500  | 4.07294100  | -1.59008300 | Rh | -0.23178400 | -0.88917900 | -1.03169000 |
| C | 5.13712000  | 4.62244900  | 0.28831600  | C  | 3.52784500  | -1.14305000 | -2.30442900 |
| H | 4.62071000  | 4.15319200  | 1.13527100  | C  | 4.06892000  | -0.34813100 | -3.32524900 |
| H | 6.03760500  | 5.11579300  | 0.67209900  | C  | 5.42550300  | -0.02298400 | -3.31947900 |
| H | 4.47393800  | 5.39100100  | -0.12235100 | C  | 6.25705000  | -0.47997600 | -2.29427100 |
| C | 6.49057600  | 2.53836800  | -0.19126600 | C  | 5.72087600  | -1.26182900 | -1.26936600 |
| H | 6.09515600  | 2.05657400  | 0.71055300  | C  | 4.36716400  | -1.59951200 | -1.27792700 |
| H | 6.71732000  | 1.75150500  | -0.91486700 | H  | 3.43173100  | 0.00366900  | -4.12904900 |
| H | 7.42463200  | 3.03678200  | 0.09123700  | H  | 5.83792600  | 0.57814700  | -4.12434700 |
| H | -0.40401600 | 4.28302200  | 4.08488300  | H  | 7.31609400  | -0.23689400 | -2.30116600 |
| H | 0.33858900  | -2.51437900 | 5.28881700  | H  | 6.35689900  | -1.62189000 | -0.46470500 |
| O | 1.23578200  | -0.05537200 | 4.57665000  | H  | 3.97142400  | -2.23177100 | -0.49590000 |
| O | -1.07634200 | 1.72963000  | 4.60714400  | Se | 1.70111400  | -1.82947400 | -2.49095600 |
| C | 1.94932600  | -0.62635300 | 5.66523100  | C  | 0.15848700  | -5.01909100 | -3.98925100 |
| H | 2.46873200  | -1.54155100 | 5.35653700  | C  | -0.51743900 | -3.81873000 | -3.81303900 |
| H | 2.68494700  | 0.12119700  | 5.96352700  | C  | -1.07479700 | -3.48596500 | -2.56254100 |
| H | 1.28708300  | -0.84282700 | 6.51321000  | C  | -0.96769400 | -4.41520900 | -1.50246600 |
| C | -0.93326100 | 2.42544700  | 5.84296000  | C  | -0.27962300 | -5.60838000 | -1.65997000 |
| H | -1.49353100 | 3.36756700  | 5.84991400  | C  | 0.28350500  | -5.88681300 | -2.90504200 |
| H | -1.34653200 | 1.76357000  | 6.60640700  | H  | 0.59699700  | -5.29288300 | -4.94233200 |
| H | 0.12430800  | 2.62288400  | 6.05560400  | H  | -0.60860800 | -3.13262700 | -4.64773900 |
| C | -4.64999300 | 3.57554500  | 2.89946600  | H  | -1.39015700 | -4.16392500 | -0.53456300 |
| H | -5.05546100 | 4.56681100  | 2.69358700  | H  | -0.16212100 | -6.31609900 | -0.84717900 |
| C | -5.85011300 | 2.61984700  | 3.03485200  | F  | 0.95314000  | -7.03564400 | -3.06790600 |
| H | -5.53297200 | 1.60203500  | 3.28908000  | C  | -1.71685500 | -2.21286700 | -2.27897900 |
| H | -6.52018400 | 2.96553800  | 3.83008900  | H  | -2.54406500 | -2.27211100 | -1.58393600 |
| H | -6.42247300 | 2.56925500  | 2.10305000  | C  | -1.59698700 | -0.99019800 | -3.00457300 |
| C | -3.86026300 | 3.66068100  | 4.21808200  | H  | -1.02387400 | -0.98771700 | -3.93080400 |
| H | -3.42064100 | 2.69088800  | 4.47170300  | H  | -2.48949700 | -0.36114400 | -3.01230900 |
| H | -3.04319600 | 4.38641100  | 4.13609800  | H  | -0.85698100 | -0.08006400 | -2.33063700 |
| H | -4.51485600 | 3.97108100  | 5.04064100  |    |             |             |             |
| C | -2.14520500 | 4.59567200  | -1.47595800 |    |             |             |             |

39-S

B3LYP-D3 SCF energy: -4539.869343 a.u.  
 B3LYP-D3 enthalpy: -4537.955850 a.u.  
 B3LYP-D3 free energy: -4538.205307 a.u.  
 M06 SCF energy in solution: -4538.844233 a.u.

Cartesian coordinates

| ATOM | X           | Y           | Z           |
|------|-------------|-------------|-------------|
| C    | 0.19499800  | -4.18487200 | 0.02465700  |
| C    | -0.26277800 | -2.87723000 | 0.31512100  |
| C    | -1.05290800 | -2.21987700 | -0.65379000 |
| C    | -1.35936800 | -2.84887500 | -1.87127400 |
| C    | -0.89864800 | -4.13563900 | -2.12677600 |
| C    | -0.12365100 | -4.80773100 | -1.18535800 |
| C    | 0.11429200  | -2.29101300 | 1.64200100  |
| C    | 0.97953200  | -1.18446600 | 1.77722300  |
| C    | -0.35460700 | -2.92401700 | 2.81692100  |
| C    | 1.38020300  | -0.74576700 | 3.04659000  |
| C    | 0.03594800  | -2.46838800 | 4.08058500  |
| C    | 0.91136200  | -1.39209800 | 4.18581400  |
| P    | -1.67215900 | -0.50950100 | -0.37200300 |
| P    | 1.60934600  | -0.36608600 | 0.24667500  |
| C    | -2.34560700 | -0.55115600 | 1.32747200  |
| C    | -2.10016600 | 0.46416200  | 2.24496100  |
| C    | -3.17191200 | -1.62339800 | 1.69259100  |
| C    | -2.64442400 | 0.42712900  | 3.53456800  |
| C    | -3.78192200 | -1.67060800 | 2.94512600  |
| C    | -3.50119000 | -0.63994800 | 3.88224000  |
| C    | -3.14075700 | -0.30559300 | -1.45695800 |
| C    | -4.44167700 | -0.38120800 | -0.95459400 |
| C    | -2.96452900 | -0.01809400 | -2.81406800 |
| C    | -5.55720900 | -0.19862500 | -1.77884700 |
| C    | -4.05029100 | 0.15603300  | -3.67385600 |
| C    | -5.36498100 | 0.05692600  | -3.15515500 |
| C    | 2.48487400  | -1.78571200 | -0.54075500 |
| C    | 2.43596300  | -2.09313900 | -1.90249000 |
| C    | 3.32917400  | -2.52817500 | 0.29124000  |
| C    | 3.22501000  | -3.11656100 | -2.44017100 |
| C    | 4.14431800  | -3.54841300 | -0.20547800 |
| C    | 4.07516200  | -3.85850400 | -1.58213700 |
| C    | 3.00844400  | 0.72235600  | 0.72664700  |
| C    | 4.24478600  | 0.57932200  | 0.09203600  |
| C    | 2.81472900  | 1.81648400  | 1.58551500  |
| C    | 5.28628500  | 1.49454300  | 0.29276000  |
| C    | 3.84782400  | 2.71657100  | 1.85978200  |
| C    | 5.08748800  | 2.57234800  | 1.18095800  |
| H    | -1.98466200 | -2.35064900 | -2.60203900 |
| H    | -1.15045500 | -4.62472700 | -3.06317200 |
| H    | 2.07765200  | 0.07387500  | 3.15320700  |
| H    | 1.23275100  | -1.05711200 | 5.16772800  |
| H    | -1.47409900 | 1.29836100  | 1.95680200  |
| H    | -3.34054200 | -2.42363100 | 0.98265800  |
| H    | -4.60430000 | -0.56018200 | 0.09899900  |
| H    | -1.96387400 | 0.08195800  | -3.20689900 |
| H    | 1.76396300  | -1.55107900 | -2.55044700 |
| H    | 3.36951000  | -2.29534400 | 1.35014700  |
| H    | 4.40608800  | -0.24686900 | -0.58861400 |
| H    | 1.84266900  | 1.96952600  | 2.04102000  |
| N    | 6.09389300  | 3.55527800  | 1.45455100  |
| C    | 7.15022100  | 3.15558900  | 2.37373000  |
| H    | 6.71224300  | 2.63540400  | 3.23162800  |
| H    | 7.91032600  | 2.49118800  | 1.92493300  |

|   |             |             |             |
|---|-------------|-------------|-------------|
| H | 7.66390800  | 4.05064500  | 2.74437300  |
| C | 6.51482300  | 4.43379300  | 0.37198400  |
| H | 5.65809400  | 4.65875800  | -0.27033600 |
| H | 6.87765000  | 5.37874000  | 0.79596000  |
| H | 7.31627800  | 4.02756900  | -0.26778900 |
| N | 4.84477300  | -4.90871600 | -2.18254900 |
| N | -6.44837800 | 0.24403900  | -4.07213900 |
| N | -4.10483000 | -0.76492300 | 5.17759600  |
| C | 4.57904200  | -6.27607600 | -1.76388600 |
| H | 4.88294500  | -6.96253000 | -2.56433400 |
| H | 5.09899400  | -6.58973100 | -0.84246800 |
| H | 3.50343200  | -6.40111300 | -1.60288200 |
| C | 6.23740700  | -4.60308400 | -2.47636800 |
| H | 6.30406200  | -3.60961200 | -2.93198900 |
| H | 6.90016200  | -4.61575400 | -1.59257500 |
| H | 6.62496200  | -5.33406800 | -3.19620200 |
| C | -7.07955500 | 1.55537600  | -4.07652700 |
| H | -7.62948800 | 1.68978400  | -5.01599100 |
| H | -7.78812200 | 1.71778500  | -3.24445100 |
| H | -6.30995900 | 2.33115900  | -4.01835300 |
| C | -7.33162200 | -0.88209900 | -4.33377300 |
| H | -8.14478800 | -1.01333900 | -3.59946800 |
| H | -7.79580900 | -0.75066400 | -5.31944400 |
| H | -6.74416700 | -1.80491400 | -4.35796700 |
| C | -3.24624500 | -1.30143100 | 6.22064600  |
| H | -2.49834800 | -0.58250300 | 6.60332700  |
| H | -3.86198100 | -1.62850500 | 7.06724000  |
| H | -2.70432700 | -2.17230500 | 5.83585600  |
| C | -5.04581800 | 0.25703100  | 5.61794600  |
| H | -5.59902500 | 0.63765700  | 4.75499300  |
| H | -5.76655000 | -0.19296400 | 6.31317500  |
| H | -4.58491600 | 1.11798400  | 6.12998900  |
| C | 6.57441500  | 1.29840700  | -0.49958300 |
| H | 7.32464800  | 1.99033100  | -0.11526500 |
| C | 6.33986100  | 1.63558500  | -1.98577800 |
| H | 5.60437200  | 0.95190200  | -2.42789600 |
| H | 5.96360100  | 2.65710700  | -2.10819000 |
| H | 7.27092900  | 1.54285400  | -2.55623500 |
| C | 7.15397200  | -0.11846300 | -0.34180100 |
| H | 8.11729200  | -0.19021100 | -0.85899000 |
| H | 7.31255600  | -0.36396600 | 0.71355500  |
| H | 6.49306400  | -0.88089400 | -0.76990000 |
| C | 3.65342000  | 3.85500900  | 2.85736400  |
| H | 4.60367300  | 3.97299100  | 3.38852300  |
| C | 3.37598900  | 5.18674100  | 2.13307900  |
| H | 2.47191600  | 5.11915800  | 1.52164900  |
| H | 3.23135000  | 5.99484800  | 2.85996800  |
| H | 4.21550300  | 5.46195200  | 1.49008100  |
| C | 2.56655000  | 3.56940600  | 3.90525200  |
| H | 1.56367300  | 3.55147200  | 3.46576400  |
| H | 2.72846100  | 2.60898600  | 4.40856700  |
| H | 2.57013200  | 4.35542500  | 4.66805000  |
| C | -3.79198200 | 0.48401300  | -5.13714000 |
| H | -4.75928200 | 0.43515500  | -5.64445300 |
| C | -2.85090300 | -0.53366600 | -5.80629000 |
| H | -1.84275600 | -0.50839600 | -5.37413400 |
| H | -3.23497200 | -1.55470400 | -5.70215000 |
| H | -2.75295500 | -0.31504100 | -6.87568000 |
| C | -3.25329000 | 1.92052900  | -5.28366200 |
| H | -3.10043900 | 2.17182200  | -6.33960800 |
| H | -3.94680500 | 2.65073300  | -4.85314800 |

|   |             |             |             |
|---|-------------|-------------|-------------|
| H | -2.29347600 | 2.03804700  | -4.76488900 |
| C | -6.93812700 | -0.29089600 | -1.13726800 |
| H | -7.67809900 | 0.04675800  | -1.86477900 |
| C | -7.26920500 | -1.75177800 | -0.77446500 |
| H | -6.54567000 | -2.14599000 | -0.05080500 |
| H | -8.26682400 | -1.82423700 | -0.32629100 |
| H | -7.24247200 | -2.39817100 | -1.65820200 |
| C | -7.07046200 | 0.62745600  | 0.09281700  |
| H | -6.42060100 | 0.30769400  | 0.91561700  |
| H | -6.81083000 | 1.66199100  | -0.15590500 |
| H | -8.10140700 | 0.61017800  | 0.46403300  |
| H | 0.23853900  | -5.80543300 | -1.40151400 |
| H | -0.32822900 | -2.95090300 | 4.97881500  |
| O | -1.19012700 | -3.98072100 | 2.63533800  |
| O | 0.96155100  | -4.77691100 | 0.97832000  |
| C | -1.52121500 | -4.78448600 | 3.76197800  |
| H | -2.15336400 | -4.23707100 | 4.47247800  |
| H | -2.08258700 | -5.63274900 | 3.36872500  |
| H | -0.61905500 | -5.14620900 | 4.27081200  |
| C | 1.04671800  | -6.19678600 | 0.97961500  |
| H | 1.67531200  | -6.56705500 | 0.15971400  |
| H | 1.51024700  | -6.46734100 | 1.92892200  |
| H | 0.05015300  | -6.65000200 | 0.91007500  |
| C | 5.07850800  | -4.26540800 | 0.76710900  |
| H | 5.74492000  | -4.91008000 | 0.19180700  |
| C | 5.97779800  | -3.27836000 | 1.53448000  |
| H | 5.39736400  | -2.60688900 | 2.17729400  |
| H | 6.67586200  | -3.82774600 | 2.17608500  |
| H | 6.56147000  | -2.66102300 | 0.84568100  |
| C | 4.28956700  | -5.16227600 | 1.73853200  |
| H | 3.52540400  | -4.58925500 | 2.27565700  |
| H | 3.78435600  | -5.96735900 | 1.19808700  |
| H | 4.96232100  | -5.61769300 | 2.47428300  |
| C | 3.16899500  | -3.44849000 | -3.92805100 |
| H | 4.16792400  | -3.78896700 | -4.21565200 |
| C | 2.20230700  | -4.61947400 | -4.18962100 |
| H | 1.18100900  | -4.34151100 | -3.90840800 |
| H | 2.20496700  | -4.89100500 | -5.25175000 |
| H | 2.48931600  | -5.50231700 | -3.61126700 |
| C | 2.80596800  | -2.24994200 | -4.81787900 |
| H | 1.75279500  | -1.96697600 | -4.71214700 |
| H | 3.41933300  | -1.37096600 | -4.58645500 |
| H | 2.96421200  | -2.50702500 | -5.87071500 |
| C | -4.76401200 | -2.79118400 | 3.28357900  |
| H | -4.53083300 | -3.13684200 | 4.29798300  |
| C | -4.68592800 | -3.99609100 | 2.33130900  |
| H | -5.09651900 | -3.75117600 | 1.34352700  |
| H | -3.66096100 | -4.34650900 | 2.18565400  |
| H | -5.28417600 | -4.82207700 | 2.73057900  |
| C | -6.21291000 | -2.25957500 | 3.30412800  |
| H | -6.48728600 | -1.85532600 | 2.32258800  |
| H | -6.91224200 | -3.07028800 | 3.53996600  |
| H | -6.34199800 | -1.47311800 | 4.04867200  |
| C | -2.31712100 | 1.57726600  | 4.48282200  |
| H | -2.70172000 | 1.32895200  | 5.47272100  |
| C | -0.80226500 | 1.79304400  | 4.64681100  |
| H | -0.31832200 | 2.04289100  | 3.69681200  |
| H | -0.61081000 | 2.61916400  | 5.34100100  |
| H | -0.31530100 | 0.89384300  | 5.03391200  |
| C | -3.01311500 | 2.87232800  | 4.01785100  |
| H | -2.65124500 | 3.18527500  | 3.03194100  |

|    |             |             |             |
|----|-------------|-------------|-------------|
| H  | -4.09714700 | 2.73410800  | 3.94674400  |
| H  | -2.81733200 | 3.68880200  | 4.72266900  |
| Rh | -0.02012200 | 1.07475300  | -0.70725700 |
| C  | -1.26305500 | 4.26513200  | 0.04942200  |
| C  | -1.48982300 | 5.49108300  | -0.59409200 |
| C  | -1.02450000 | 6.68165600  | -0.03371000 |
| C  | -0.34129500 | 6.66560500  | 1.18396500  |
| C  | -0.12571300 | 5.45001300  | 1.83648600  |
| C  | -0.57197900 | 4.25502700  | 1.26908600  |
| H  | -2.03346100 | 5.51081700  | -1.53359500 |
| H  | -1.19782200 | 7.62217300  | -0.54933300 |
| H  | 0.01282000  | 7.59261200  | 1.62531000  |
| H  | 0.38693400  | 5.43234700  | 2.79319200  |
| H  | -0.39747700 | 3.31517500  | 1.78258300  |
| Se | -2.03907100 | 2.64157000  | -0.71556100 |
| C  | 0.57886800  | 4.80617600  | -2.88902200 |
| C  | 0.42988200  | 3.43920800  | -3.01408800 |
| C  | 1.29956400  | 2.53813500  | -2.34321000 |
| C  | 2.33119000  | 3.09205400  | -1.54631200 |
| C  | 2.47171300  | 4.46834000  | -1.38938000 |
| C  | 1.58751300  | 5.30361500  | -2.05657800 |
| H  | -0.08089100 | 5.50138700  | -3.39480700 |
| H  | -0.38475200 | 3.05733000  | -3.61580500 |
| H  | 3.04716800  | 2.43561200  | -1.07294600 |
| H  | 3.24663600  | 4.89236000  | -0.76320600 |
| F  | 1.69556600  | 6.62853800  | -1.90461600 |
| C  | 1.17222600  | 1.07082100  | -2.46999500 |
| H  | 2.12342800  | 0.57718900  | -2.27194000 |
| C  | 0.49798200  | 0.48564600  | -3.68889700 |
| H  | 1.18964100  | 0.50734500  | -4.54325900 |
| H  | 0.21343500  | -0.55685400 | -3.52003300 |
| H  | -0.39919500 | 1.03310400  | -3.97602000 |

#### cod

B3LYP-D3 SCF energy: -312.040162 a.u.

B3LYP-D3 enthalpy: -311.850482 a.u.

B3LYP-D3 free energy: -311.890286 a.u.

M06 SCF energy in solution: -311.846102 a.u.

#### Cartesian coordinates

| ATOM | X           | Y           | Z           |
|------|-------------|-------------|-------------|
| C    | -1.19541800 | -1.24663100 | -0.49962300 |
| H    | -1.79230800 | -1.85358400 | -1.18267300 |
| C    | 0.03198700  | -1.70210300 | -0.22051200 |
| H    | 0.33213300  | -2.62325200 | -0.72112000 |
| C    | 1.09433300  | -1.09412500 | 0.66984300  |
| H    | 1.79155300  | -1.88675900 | 0.96922000  |
| H    | 0.66701200  | -0.71328800 | 1.60031000  |
| C    | 1.92102400  | 0.01210400  | -0.02149200 |
| H    | 2.73306000  | 0.32165100  | 0.65633400  |
| H    | 2.42914000  | -0.43025400 | -0.89138800 |
| C    | 1.19546400  | 1.24661000  | -0.49955300 |
| H    | 1.79247700  | 1.85362600  | -1.18245200 |
| C    | -0.03193600 | 1.70214000  | -0.22052300 |
| H    | -0.33195700 | 2.62331600  | -0.72114300 |
| C    | -1.09440700 | 1.09418400  | 0.66971700  |
| H    | -1.79173100 | 1.88681700  | 0.96885700  |
| H    | -0.66721400 | 0.71356300  | 1.60034000  |
| C    | -1.92103100 | -0.01220000 | -0.02144900 |
| H    | -2.73292000 | -0.32177500 | 0.65653800  |
| H    | -2.42934400 | 0.43005900  | -0.89128000 |

**2-O**

B3LYP-D3 SCF energy: -307.465513 a.u.

B3LYP-D3 enthalpy: -307.354223 a.u.

B3LYP-D3 free energy: -307.389638 a.u.

M06 SCF energy in solution: -307.328761 a.u.

## Cartesian coordinates

| ATOM | X           | Y           | Z           |
|------|-------------|-------------|-------------|
| C    | 0.94151500  | -0.02306000 | 0.00009300  |
| C    | 0.26304900  | 1.20074300  | 0.00013300  |
| C    | -1.13329800 | 1.21914200  | -0.00011900 |
| C    | -1.85804900 | 0.02662600  | -0.00005200 |
| C    | -1.17093300 | -1.19173800 | 0.00012100  |
| C    | 0.22181900  | -1.22375100 | -0.00003600 |
| H    | 0.82503400  | 2.13331500  | 0.00027400  |
| H    | -1.65210600 | 2.17415500  | -0.00014300 |
| H    | -2.94386000 | 0.04452500  | -0.00012800 |
| H    | -1.72414700 | -2.12728800 | 0.00010100  |
| H    | 0.76965600  | -2.16075900 | -0.00019500 |
| H    | 2.68299100  | 0.78221000  | -0.00003800 |
| O    | 2.30722800  | -0.11174200 | -0.00008900 |

**3-O**

B3LYP-D3 SCF energy: -4504.443309 a.u.

B3LYP-D3 enthalpy: -4502.551580 a.u.

B3LYP-D3 free energy: -4502.799378 a.u.

M06 SCF energy in solution: -4503.327286 a.u.

## Cartesian coordinates

| ATOM | X           | Y           | Z           |
|------|-------------|-------------|-------------|
| C    | -0.44126100 | 4.20437300  | 0.60901000  |
| C    | 0.09527500  | 2.90220400  | 0.72873500  |
| C    | 0.89153400  | 2.40098900  | -0.32191800 |
| C    | 1.16848400  | 3.20532600  | -1.43781900 |
| C    | 0.65158600  | 4.49508000  | -1.51917500 |
| C    | -0.16095600 | 4.99825100  | -0.50666900 |
| C    | -0.18399500 | 2.16375300  | 2.00166900  |
| C    | -1.01297300 | 1.02727600  | 2.07514200  |
| C    | 0.36356200  | 2.67872600  | 3.20057300  |
| C    | -1.31076400 | 0.44624700  | 3.31768800  |
| C    | 0.08976300  | 2.07297400  | 4.43072400  |
| C    | -0.75887700 | 0.96979300  | 4.48181900  |
| P    | 1.46867200  | 0.64480800  | -0.29142800 |
| P    | -1.60028600 | 0.25133300  | 0.51230800  |
| C    | 2.40314500  | 0.51150400  | 1.26733800  |
| C    | 2.25766000  | -0.61841700 | 2.06723500  |
| C    | 3.24629200  | 1.55103400  | 1.67699600  |
| C    | 2.89918000  | -0.70957900 | 3.30961500  |
| C    | 3.93723800  | 1.48147000  | 2.88545100  |
| C    | 3.74253500  | 0.34768700  | 3.71981000  |
| C    | 2.73099900  | 0.51390400  | -1.62312900 |
| C    | 4.09144300  | 0.35531400  | -1.36925400 |
| C    | 2.27940400  | 0.40866700  | -2.94957200 |
| C    | 5.00475600  | 0.08710300  | -2.40069700 |
| C    | 3.14741000  | 0.10405300  | -4.00058700 |
| C    | 4.52783700  | -0.08157000 | -3.72127500 |
| C    | -2.57811500 | 1.52920800  | -0.34412700 |
| C    | -2.40267100 | 1.67922900  | -1.72344400 |
| C    | -3.51662100 | 2.31674400  | 0.32273100  |
| C    | -3.12619900 | 2.62915100  | -2.44379000 |

|   |             |             |             |
|---|-------------|-------------|-------------|
| C | -4.29384700 | 3.25178000  | -0.37157000 |
| C | -4.06510800 | 3.43771300  | -1.75529200 |
| C | -2.79117900 | -1.06403300 | 0.99562300  |
| C | -4.10687000 | -1.08054700 | 0.52286700  |
| C | -2.31116700 | -2.18810400 | 1.68699100  |
| C | -4.95196100 | -2.17999900 | 0.74780200  |
| C | -3.14102800 | -3.26661900 | 1.99372400  |
| C | -4.48733400 | -3.25502300 | 1.53947300  |
| H | 1.79688800  | 2.83539700  | -2.23858900 |
| H | 0.87788500  | 5.11422600  | -2.38229400 |
| H | -1.97443100 | -0.40590200 | 3.38348300  |
| H | -0.99013000 | 0.51572100  | 5.44126200  |
| H | 1.60535500  | -1.41746400 | 1.72753600  |
| H | 3.34275000  | 2.42792400  | 1.04738500  |
| H | 4.45441100  | 0.42514400  | -0.35039800 |
| H | 1.21881700  | 0.53891200  | -3.15564600 |
| H | -1.66509600 | 1.05611900  | -2.21823200 |
| H | -3.65165300 | 2.19713900  | 1.39409200  |
| H | -4.48064100 | -0.23274200 | -0.04178700 |
| H | -1.27183000 | -2.21101700 | 2.00093500  |
| N | -5.31551000 | -4.36008300 | 1.90592200  |
| C | -6.52315000 | -4.09953900 | 2.67646900  |
| H | -6.33857700 | -3.26886500 | 3.36370400  |
| H | -7.41488700 | -3.85435400 | 2.07586600  |
| H | -6.76193300 | -4.98736000 | 3.27528800  |
| C | -5.38353300 | -5.46807100 | 0.96629100  |
| H | -4.37185800 | -5.74878000 | 0.65287100  |
| H | -5.83309000 | -6.33614700 | 1.46184000  |
| H | -5.97346500 | -5.25136800 | 0.05774700  |
| N | -4.74142100 | 4.43865500  | -2.52664500 |
| N | 5.37165300  | -0.44649300 | -4.81536700 |
| N | 4.40627700  | 0.36945300  | 4.99200600  |
| C | -4.52787700 | 5.83224100  | -2.16950800 |
| H | -4.69311100 | 6.45979500  | -3.05477700 |
| H | -5.18435200 | 6.21199700  | -1.36743600 |
| H | -3.49001300 | 5.96541000  | -1.84819500 |
| C | -6.07498400 | 4.10975600  | -3.00560100 |
| H | -6.08232500 | 3.08479900  | -3.39045800 |
| H | -6.86386100 | 4.18848000  | -2.23565500 |
| H | -6.34253800 | 4.78415300  | -3.82825700 |
| C | 6.04589400  | -1.73521100 | -4.77349400 |
| H | 6.24561200  | -2.06729700 | -5.79999500 |
| H | 7.00643700  | -1.73950100 | -4.23122800 |
| H | 5.38771900  | -2.47283900 | -4.30361100 |
| C | 6.09863100  | 0.63239900  | -5.46759000 |
| H | 6.98338500  | 0.98113800  | -4.90540500 |
| H | 6.43804500  | 0.29645300  | -6.45456100 |
| H | 5.43109900  | 1.48820000  | -5.61129000 |
| C | 3.59178500  | 0.79941000  | 6.11684100  |
| H | 2.88513400  | 0.03135600  | 6.48177400  |
| H | 4.24331900  | 1.08099100  | 6.95317300  |
| H | 3.00570000  | 1.67845800  | 5.82808800  |
| C | 5.39403000  | -0.65339900 | 5.30199300  |
| H | 5.93322500  | -0.92651700 | 4.39068300  |
| H | 6.12116800  | -0.24528800 | 6.01628800  |
| H | 4.98058500  | -1.57673800 | 5.74118700  |
| C | -6.32285900 | -2.17499200 | 0.08138400  |
| H | -6.79613600 | -3.14095800 | 0.26427200  |
| C | -6.18871900 | -2.02993600 | -1.44818800 |
| H | -5.77489400 | -1.05449300 | -1.72954000 |
| H | -5.53566200 | -2.80687300 | -1.86310800 |

|   |             |             |             |                                                |             |             |             |
|---|-------------|-------------|-------------|------------------------------------------------|-------------|-------------|-------------|
| H | -7.17106700 | -2.12125600 | -1.92474400 | H                                              | -1.69449100 | 4.13908100  | -5.22345200 |
| C | -7.23527300 | -1.08222500 | 0.66820400  | H                                              | -2.20537200 | 4.89534100  | -3.70069300 |
| H | -8.22232100 | -1.10891300 | 0.19310100  | C                                              | -2.39395700 | 1.54737500  | -4.64779900 |
| H | -7.37111100 | -1.21547400 | 1.74679800  | H                                              | -1.37916200 | 1.25992700  | -4.34340400 |
| H | -6.81124000 | -0.08446100 | 0.50531500  | H                                              | -3.05671800 | 0.69787300  | -4.44666200 |
| C | -2.58173500 | -4.42142600 | 2.81321900  | H                                              | -2.36949400 | 1.71366600  | -5.73031100 |
| H | -3.36412100 | -5.18154100 | 2.87521700  | C                                              | 4.90130500  | 2.59364000  | 3.29074100  |
| C | -1.34423700 | -5.05209200 | 2.14703400  | H                                              | 4.74710500  | 2.78967900  | 4.35813100  |
| H | -0.50698300 | -4.34708000 | 2.09118400  | C                                              | 4.68956600  | 3.90877300  | 2.52316800  |
| H | -1.00551700 | -5.91956700 | 2.72506200  | H                                              | 5.02073400  | 3.82191300  | 1.48073600  |
| H | -1.56464600 | -5.38480600 | 1.12637600  | H                                              | 3.64019100  | 4.21563200  | 2.51236700  |
| C | -2.27020300 | -3.96005900 | 4.24980400  | H                                              | 5.28310900  | 4.70634800  | 2.98298100  |
| H | -1.50617200 | -3.17436700 | 4.25900700  | C                                              | 6.36254500  | 2.12959000  | 3.11905500  |
| H | -3.16833900 | -3.56490700 | 4.73733800  | H                                              | 6.56584800  | 1.88923000  | 2.06784600  |
| H | -1.89707700 | -4.79775200 | 4.85017200  | H                                              | 7.05508600  | 2.92379900  | 3.42161900  |
| C | 2.57322800  | -0.05401400 | -5.40115200 | H                                              | 6.57505200  | 1.24474700  | 3.72204900  |
| H | 3.40181900  | -0.34162600 | -6.05343300 | C                                              | 2.67022200  | -1.95546800 | 4.15890200  |
| C | 1.98277100  | 1.27237400  | -5.91557700 | H                                              | 2.99704500  | -1.74012100 | 5.17802700  |
| H | 1.13214300  | 1.59792600  | -5.30322700 | C                                              | 1.18528200  | -2.35105900 | 4.24252600  |
| H | 2.73138200  | 2.07249900  | -5.90192800 | H                                              | 0.80828600  | -2.70371200 | 3.27590600  |
| H | 1.62567200  | 1.15828500  | -6.94521600 | H                                              | 1.05257000  | -3.16989400 | 4.95847100  |
| C | 1.52009500  | -1.17915200 | -5.44744600 | H                                              | 0.56396400  | -1.50679400 | 4.55659400  |
| H | 1.17133900  | -1.33572200 | -6.47413900 | C                                              | 3.50687700  | -3.13359500 | 3.62292400  |
| H | 1.93453400  | -2.12723500 | -5.08348000 | H                                              | 3.20279900  | -3.38649400 | 2.60168800  |
| H | 0.64154800  | -0.93468600 | -4.83625400 | H                                              | 4.57455000  | -2.89265000 | 3.60366100  |
| C | 6.47956700  | -0.03868400 | -2.03283200 | H                                              | 3.36847200  | -4.02324700 | 4.24916700  |
| H | 7.05996900  | -0.09711700 | -2.95535100 | Rh                                             | -0.13040700 | -0.83374700 | -0.77050100 |
| C | 6.98174500  | 1.20056800  | -1.26693200 | C                                              | -1.82937700 | -3.37143500 | -2.14378300 |
| H | 6.49619900  | 1.30012500  | -0.28937800 | C                                              | -2.54279500 | -4.35237800 | -1.45608900 |
| H | 8.06055100  | 1.12321300  | -1.09211900 | C                                              | -2.44950400 | -5.68084600 | -1.87746200 |
| H | 6.79131200  | 2.11924900  | -1.83229800 | C                                              | -1.64557700 | -6.02063000 | -2.96685000 |
| C | 6.73981000  | -1.32762900 | -1.22801100 | C                                              | -0.94572900 | -5.01968300 | -3.64783000 |
| H | 6.16623500  | -1.33005500 | -0.29350200 | C                                              | -1.03898400 | -3.68735600 | -3.24644600 |
| H | 6.45427200  | -2.21725600 | -1.80041600 | H                                              | -3.15135500 | -4.07782100 | -0.60108800 |
| H | 7.80188300  | -1.41501400 | -0.97297900 | H                                              | -3.00719300 | -6.44841300 | -1.34783400 |
| H | -0.56874600 | 5.99878400  | -0.58834100 | H                                              | -1.56942200 | -7.05477900 | -3.28817900 |
| H | 0.51960700  | 2.45963400  | 5.34634500  | H                                              | -0.32604700 | -5.27547600 | -4.50243400 |
| O | 1.15213100  | 3.78042800  | 3.07127300  | H                                              | -0.50079300 | -2.89984200 | -3.75921900 |
| O | -1.23710900 | 4.61570000  | 1.63456600  | H                                              | -2.65040600 | -1.91660900 | -1.14815700 |
| C | 1.57817200  | 4.45075100  | 4.25110200  | C                                              | 1.97512800  | -3.11366700 | -1.17867600 |
| H | 2.28473400  | 3.83952000  | 4.82721300  | C                                              | 1.26578300  | -4.03123200 | -0.40376600 |
| H | 2.08561900  | 5.35527800  | 3.91338400  | C                                              | 1.97704500  | -4.94829600 | 0.36891100  |
| H | 0.72485400  | 4.72425300  | 4.88441400  | C                                              | 3.37610400  | -4.95026100 | 0.36462000  |
| C | -1.39837400 | 6.01415200  | 1.83724700  | C                                              | 4.06549900  | -4.02375800 | -0.41947800 |
| H | -2.00054600 | 6.47726800  | 1.04638000  | C                                              | 3.36799400  | -3.09855700 | -1.19955600 |
| H | -1.92675000 | 6.11901300  | 2.78616000  | H                                              | 0.18198900  | -4.02812900 | -0.42300100 |
| H | -0.42391500 | 6.51522500  | 1.89486400  | H                                              | 1.43146600  | -5.66706900 | 0.97322800  |
| C | -5.37200200 | 4.00904600  | 0.39771300  | H                                              | 3.92257100  | -5.66685300 | 0.96994500  |
| H | -5.95479100 | 4.59676400  | -0.31330300 | H                                              | 5.15155900  | -4.01125200 | -0.42685200 |
| C | -6.35715400 | 3.03907700  | 1.07866900  | H                                              | 3.89771400  | -2.36766100 | -1.80301700 |
| H | -5.86701400 | 2.43262300  | 1.84885100  | H                                              | 1.84193900  | -1.65048900 | -2.47181600 |
| H | -7.16715000 | 3.59664700  | 1.56243800  | O                                              | -1.87968200 | -2.04164800 | -1.73478000 |
| H | -6.80379400 | 2.35661500  | 0.34671600  | O                                              | 1.23950100  | -2.20539000 | -1.93710300 |
| C | -4.75710800 | 4.98641800  | 1.41527500  |                                                |             |             |             |
| H | -4.09680000 | 4.46593000  | 2.11787400  | <b>4-ts-O</b>                                  |             |             |             |
| H | -4.16226900 | 5.75030800  | 0.90506000  | B3LYP-D3 SCF energy: -4504.394013 a.u.         |             |             |             |
| H | -5.54147000 | 5.49277800  | 1.98955400  | B3LYP-D3 enthalpy: -4502.508076 a.u.           |             |             |             |
| C | -2.86756400 | 2.82441800  | -3.93387200 | B3LYP-D3 free energy: -4502.751636 a.u.        |             |             |             |
| H | -3.81009500 | 3.13733400  | -4.39327000 | M06 SCF energy in solution: -4503.269259 a.u.  |             |             |             |
| C | -1.85291900 | 3.96362200  | -4.15265500 | Imaginary frequency: -1153.43 cm <sup>-1</sup> |             |             |             |
| H | -0.88941400 | 3.70763400  | -3.69764100 |                                                |             |             |             |



| Cartesian coordinates |             |             |             |   |             |             |             |
|-----------------------|-------------|-------------|-------------|---|-------------|-------------|-------------|
| ATOM                  | X           | Y           | Z           |   |             |             |             |
| C                     | -0.20804900 | 0.00575400  | 3.98789100  | N | -3.83884100 | 3.96098400  | 3.53579500  |
| C                     | 0.19725400  | -0.36873600 | 2.68872700  | N | 5.55412400  | 4.39025900  | -1.22719900 |
| C                     | 0.95405900  | 0.54392400  | 1.92658000  | N | 4.40841500  | -5.17091200 | 0.93232500  |
| C                     | 1.28954300  | 1.79591300  | 2.46462500  | C | -3.45123700 | 4.02965900  | 4.93579100  |
| C                     | 0.87665900  | 2.14302900  | 3.74828700  | H | -3.42147500 | 5.08126300  | 5.24959500  |
| C                     | 0.13013500  | 1.25407400  | 4.51603900  | H | -4.12404100 | 3.49688400  | 5.62941100  |
| C                     | -0.19688100 | -1.72882200 | 2.21450800  | H | -2.44624100 | 3.61240100  | 5.05160300  |
| C                     | -1.12004800 | -1.94056800 | 1.17098100  | C | -5.16255100 | 4.47815000  | 3.22495700  |
| C                     | 0.33482800  | -2.85287000 | 2.88985200  | H | -5.29229000 | 4.52446700  | 2.13895100  |
| C                     | -1.51449500 | -3.24516200 | 0.83185500  | H | -5.98891400 | 3.87277600  | 3.63972000  |
| C                     | -0.04924300 | -4.14858500 | 2.53207100  | H | -5.25970100 | 5.49517600  | 3.62417500  |
| C                     | -0.98353400 | -4.33321800 | 1.51567700  | C | 6.41330300  | 4.13587900  | -2.37439900 |
| P                     | 1.50701200  | 0.10116500  | 0.21903200  | H | 6.64527900  | 5.08921900  | -2.86665600 |
| P                     | -1.69143100 | -0.53484900 | 0.11747500  | H | 7.37250500  | 3.64657200  | -2.13273600 |
| C                     | 2.37028700  | -1.49025300 | 0.42776300  | H | 5.87983300  | 3.50172900  | -3.08715400 |
| C                     | 2.12157300  | -2.53579800 | -0.45878400 | C | 6.12687700  | 5.21749100  | -0.17753000 |
| C                     | 3.27673200  | -1.67865100 | 1.47701200  | H | 6.95133800  | 4.73129300  | 0.37514100  |
| C                     | 2.76313400  | -3.77223100 | -0.32924900 | H | 6.51742800  | 6.14377700  | -0.61605500 |
| C                     | 3.95948600  | -2.88566100 | 1.62865000  | H | 5.34917900  | 5.48597100  | 0.54453600  |
| C                     | 3.69875200  | -3.94327600 | 0.71588000  | C | 3.66299700  | -6.22534900 | 1.60142200  |
| C                     | 2.76556500  | 1.36714400  | -0.18471800 | H | 2.92278200  | -6.73502500 | 0.95802100  |
| C                     | 4.13118800  | 1.09694500  | -0.12539300 | H | 4.36194100  | -6.98341600 | 1.97460700  |
| C                     | 2.34563100  | 2.65796800  | -0.53584200 | H | 3.12643100  | -5.80641000 | 2.45948200  |
| C                     | 5.08346000  | 2.08379100  | -0.40548100 | C | 5.33918100  | -5.62883200 | -0.09113400 |
| C                     | 3.26111700  | 3.65754100  | -0.86515200 | H | 5.82513900  | -4.76503000 | -0.55336000 |
| C                     | 4.64854600  | 3.36092800  | -0.82327100 | H | 6.11666500  | -6.24349700 | 0.38031500  |
| C                     | -2.31579200 | 0.78346900  | 1.19887700  | H | 4.88182000  | -6.23036600 | -0.89427400 |
| C                     | -2.05173900 | 2.11467500  | 0.86441700  | C | -6.93907800 | -0.87427000 | -0.78421000 |
| C                     | -3.12358900 | 0.48936300  | 2.29938900  | H | -7.63371000 | -1.13090100 | -1.58582600 |
| C                     | -2.55305000 | 3.16024100  | 1.64120000  | C | -7.05809000 | 0.64484800  | -0.56048300 |
| C                     | -3.70183800 | 1.51304600  | 3.05908900  | H | -6.45003400 | 0.98578300  | 0.28525600  |
| C                     | -3.37695900 | 2.85477700  | 2.75329400  | H | -6.73714200 | 1.20313100  | -1.44606900 |
| C                     | -3.13749000 | -1.17664300 | -0.80087600 | H | -8.09877600 | 0.91171600  | -0.34550700 |
| C                     | -4.44865700 | -0.83944900 | -0.46048000 | C | -7.36900500 | -1.64854400 | 0.47737400  |
| C                     | -2.91549100 | -1.99609900 | -1.91343600 | H | -8.38898700 | -1.37448100 | 0.77049300  |
| C                     | -5.53690200 | -1.29289200 | -1.21534300 | H | -7.33990700 | -2.73032100 | 0.31041300  |
| C                     | -3.97160900 | -2.48130600 | -2.68534100 | H | -6.70366000 | -1.41971800 | 1.31758200  |
| C                     | -5.29949700 | -2.12309600 | -2.33699700 | C | -3.66184300 | -3.33646000 | -3.90536200 |
| H                     | 1.88347900  | 2.49774100  | 1.89409700  | H | -4.61854200 | -3.71066600 | -4.27946500 |
| H                     | 1.13887000  | 3.11613900  | 4.15242800  | C | -3.01503200 | -2.48028400 | -5.01232000 |
| H                     | -2.23689300 | -3.41466800 | 0.04385300  | H | -2.06761800 | -2.04466400 | -4.67364800 |
| H                     | -1.29824900 | -5.33936700 | 1.25422800  | H | -2.81654100 | -3.08816100 | -5.90241600 |
| H                     | 1.39693100  | -2.39378600 | -1.25560600 | H | -3.66854400 | -1.65082300 | -5.30502700 |
| H                     | 3.43995500  | -0.87274800 | 2.18250400  | C | -2.77759700 | -4.54674700 | -3.55463300 |
| H                     | 4.47298000  | 0.10620700  | 0.14792700  | H | -1.77833000 | -4.24211100 | -3.21867900 |
| H                     | 1.28390900  | 2.89235400  | -0.55102900 | H | -3.22888600 | -5.15237900 | -2.76048400 |
| H                     | -1.43284000 | 2.32331300  | -0.00134000 | H | -2.64411300 | -5.18528600 | -4.43505500 |
| H                     | -3.31646100 | -0.54694700 | 2.56182300  | C | 2.75375300  | 5.04727800  | -1.22638400 |
| H                     | -4.63277700 | -0.19280200 | 0.38826900  | H | 3.62294800  | 5.62065200  | -1.55934700 |
| H                     | -1.89918000 | -2.24571800 | -2.20323600 | C | 2.16009800  | 5.74502100  | 0.01240200  |
| N                     | -6.34914600 | -2.61299100 | -3.17677900 | H | 1.27492300  | 5.21473100  | 0.37971100  |
| C                     | -7.30335000 | -3.55896500 | -2.61884100 | H | 2.88599600  | 5.79051300  | 0.83228000  |
| H                     | -6.78350000 | -4.23608500 | -1.93443400 | H | 1.85691400  | 6.77015300  | -0.23007800 |
| H                     | -8.14493500 | -3.09988200 | -2.07251000 | C | 1.73741800  | 5.02306300  | -2.38188600 |
| H                     | -7.72723000 | -4.16094400 | -3.43247500 | H | 1.40926000  | 6.04142100  | -2.61943000 |
| C                     | -6.87800000 | -1.68296700 | -4.16258600 | H | 2.18297000  | 4.58995600  | -3.28207400 |
| H                     | -6.05209400 | -1.14012100 | -4.63318800 | H | 0.84216300  | 4.43965200  | -2.13295500 |
| H                     | -7.40478400 | -2.24317800 | -4.94436500 | C | 6.55315900  | 1.73944200  | -0.18409300 |
| H                     | -7.58228200 | -0.93835200 | -3.74874300 | H | 7.14851700  | 2.63268800  | -0.37785100 |
|                       |             |             |             | C | 6.80404300  | 1.34992400  | 1.28676900  |
|                       |             |             |             | H | 6.26538000  | 0.43433800  | 1.55851900  |

|    |             |             |             |
|----|-------------|-------------|-------------|
| H  | 7.87165100  | 1.16913700  | 1.45593600  |
| H  | 6.47844900  | 2.14416600  | 1.96772800  |
| C  | 7.04165000  | 0.63638600  | -1.13923000 |
| H  | 6.49113500  | -0.29879700 | -0.98023300 |
| H  | 6.89984300  | 0.92846000  | -2.18362100 |
| H  | 8.10557600  | 0.43135700  | -0.97428200 |
| H  | -0.19228200 | 1.53083200  | 5.51341600  |
| H  | 0.36482500  | -5.01019100 | 3.04086400  |
| O  | 1.22349300  | -2.58455200 | 3.88475600  |
| O  | -0.95822400 | -0.90654300 | 4.66809400  |
| C  | 1.67752500  | -3.66075800 | 4.69657300  |
| H  | 2.30143600  | -4.35766500 | 4.12298000  |
| H  | 2.28220100  | -3.20745400 | 5.48278000  |
| H  | 0.83745500  | -4.20272300 | 5.14856800  |
| C  | -0.82747600 | -0.94727800 | 6.08696100  |
| H  | -1.34330500 | -0.11022600 | 6.57083500  |
| H  | -1.29899400 | -1.87974100 | 6.40294500  |
| H  | 0.22984100  | -0.94804900 | 6.37754100  |
| C  | -4.67487400 | 1.13891000  | 4.17273100  |
| H  | -5.14544500 | 2.05453600  | 4.53460900  |
| C  | -5.80931600 | 0.23591400  | 3.65270900  |
| H  | -5.43401400 | -0.74112900 | 3.32715600  |
| H  | -6.54589100 | 0.05714500  | 4.44408000  |
| H  | -6.32626700 | 0.69835900  | 2.80456700  |
| C  | -3.94771200 | 0.48039800  | 5.35797400  |
| H  | -3.43726600 | -0.43445600 | 5.04094900  |
| H  | -3.19289100 | 1.15588000  | 5.77488800  |
| H  | -4.65619100 | 0.22558600  | 6.15453900  |
| C  | -2.15889200 | 4.60253000  | 1.34383000  |
| H  | -3.00476400 | 5.24131300  | 1.61443700  |
| C  | -0.97607700 | 5.00804700  | 2.24602300  |
| H  | -0.11380300 | 4.35751900  | 2.06148300  |
| H  | -0.67471100 | 6.04345300  | 2.04904700  |
| H  | -1.24393300 | 4.92220000  | 3.30294000  |
| C  | -1.82961300 | 4.85839200  | -0.13346500 |
| H  | -0.90912800 | 4.35009500  | -0.44450000 |
| H  | -2.63242300 | 4.51847200  | -0.79509600 |
| H  | -1.67333600 | 5.92979500  | -0.30076700 |
| C  | 4.99810700  | -3.04652200 | 2.73537800  |
| H  | 4.88313300  | -4.05539200 | 3.14763800  |
| C  | 4.84179400  | -2.03395100 | 3.88216200  |
| H  | 5.14917200  | -1.02664300 | 3.57417500  |
| H  | 3.80985100  | -1.97006900 | 4.23957000  |
| H  | 5.48466700  | -2.32196000 | 4.72071800  |
| C  | 6.42445800  | -2.95009700 | 2.15469300  |
| H  | 6.58244800  | -1.97140000 | 1.68497900  |
| H  | 7.16939800  | -3.06501900 | 2.95060300  |
| H  | 6.60450800  | -3.72438800 | 1.40655300  |
| C  | 2.45151200  | -4.85517000 | -1.35797800 |
| H  | 2.88503400  | -5.79463200 | -1.01206300 |
| C  | 0.94089400  | -5.10100900 | -1.52408400 |
| H  | 0.42389100  | -4.22453500 | -1.93247500 |
| H  | 0.76985600  | -5.93254900 | -2.21680000 |
| H  | 0.47228900  | -5.34319400 | -0.56622600 |
| C  | 3.10175000  | -4.50628100 | -2.71198600 |
| H  | 2.68727100  | -3.57445500 | -3.11629100 |
| H  | 4.18424200  | -4.37386900 | -2.61154700 |
| H  | 2.92057000  | -5.30040300 | -3.44519200 |
| Rh | -0.06055600 | 0.01167300  | -1.42210600 |
| C  | 2.37500100  | 0.81147000  | -3.42904200 |
| C  | 2.89555200  | 1.87438200  | -4.17947700 |

|   |             |             |             |
|---|-------------|-------------|-------------|
| C | 4.21650100  | 1.83173900  | -4.62290500 |
| C | 5.03203900  | 0.73898100  | -4.31252900 |
| C | 4.51225600  | -0.31528400 | -3.55664300 |
| C | 3.19077600  | -0.28299000 | -3.11581800 |
| H | 2.24500600  | 2.70593300  | -4.42743700 |
| H | 4.60698400  | 2.65135000  | -5.22017700 |
| H | 6.05940200  | 0.70656000  | -4.66309900 |
| H | 5.13622500  | -1.16949700 | -3.30903200 |
| H | 2.78134200  | -1.09682800 | -2.52972200 |
| H | 0.50803500  | 1.45097300  | -1.91638700 |
| C | -2.21153800 | 1.39248800  | -3.32252400 |
| C | -3.58671300 | 1.23170000  | -3.18018500 |
| C | -4.40173800 | 2.36539200  | -3.19706200 |
| C | -3.85141200 | 3.63805500  | -3.36492700 |
| C | -2.46947500 | 3.77708400  | -3.52008000 |
| C | -1.64003300 | 2.65571700  | -3.49421200 |
| H | -4.00300900 | 0.23924700  | -3.06920200 |
| H | -5.47645700 | 2.24713500  | -3.09427900 |
| H | -4.49353800 | 4.51346500  | -3.38441500 |
| H | -2.02957900 | 4.76098900  | -3.65534400 |
| H | -0.56468400 | 2.75168300  | -3.60668200 |
| H | -0.57055900 | 0.43614800  | -3.77375400 |
| O | -1.40806200 | 0.24465800  | -3.28659900 |
| O | 1.04914900  | 0.82803700  | -3.10597700 |

### 5-O

B3LYP-D3 SCF energy: -4504.425165 a.u.

B3LYP-D3 enthalpy: -4502.538956 a.u.

B3LYP-D3 free energy: -4502.784313 a.u.

M06 SCF energy in solution: -4503.303880 a.u.

### Cartesian coordinates

| ATOM | X           | Y           | Z           |
|------|-------------|-------------|-------------|
| C    | -0.02104700 | -2.46019700 | 3.22227000  |
| C    | 0.37682300  | -1.94181000 | 1.97041800  |
| C    | 1.06928200  | -0.71319000 | 1.94186100  |
| C    | 1.34702300  | -0.03055000 | 3.13572500  |
| C    | 0.94381300  | -0.56409000 | 4.35683400  |
| C    | 0.26191800  | -1.77628400 | 4.40781500  |
| C    | 0.04923800  | -2.75872600 | 0.76084000  |
| C    | -0.91489500 | -2.37198500 | -0.19248500 |
| C    | 0.67528600  | -4.01819200 | 0.61447500  |
| C    | -1.25459300 | -3.22955500 | -1.25052600 |
| C    | 0.34939800  | -4.85718000 | -0.45637300 |
| C    | -0.62470800 | -4.46363300 | -1.37096900 |
| P    | 1.58964700  | 0.03241700  | 0.34137600  |
| P    | -1.64322300 | -0.68472800 | -0.12274400 |
| C    | 2.52209800  | -1.27132800 | -0.51417200 |
| C    | 2.29205800  | -1.53954900 | -1.86193600 |
| C    | 3.47175300  | -2.02091000 | 0.18973900  |
| C    | 2.98508000  | -2.55796500 | -2.52717300 |
| C    | 4.22178800  | -3.00821900 | -0.44806700 |
| C    | 3.96954600  | -3.28393000 | -1.81889000 |
| C    | 2.73612300  | 1.37949400  | 0.77044800  |
| C    | 4.11974200  | 1.20960300  | 0.71887500  |
| C    | 2.21555900  | 2.60276700  | 1.21096800  |
| C    | 4.99155300  | 2.23052700  | 1.11094600  |
| C    | 3.05179900  | 3.65185000  | 1.59111400  |
| C    | 4.45633100  | 3.47410700  | 1.51630000  |
| C    | -2.37498900 | -0.49077200 | 1.53252300  |
| C    | -2.23273600 | 0.70423600  | 2.23777900  |

|   |             |             |             |   |             |             |             |
|---|-------------|-------------|-------------|---|-------------|-------------|-------------|
| C | -3.16761100 | -1.51034200 | 2.07122500  | H | -6.26981300 | 1.12628100  | 0.53678700  |
| C | -2.85841200 | 0.90306700  | 3.46966900  | H | -6.54382300 | 2.19448900  | -0.84739000 |
| C | -3.82973600 | -1.34328600 | 3.29204000  | H | -7.91974100 | 1.41160400  | -0.03845900 |
| C | -3.64889100 | -0.13692300 | 4.01229400  | C | -7.28957700 | -1.21913200 | -0.65815700 |
| C | -3.02513800 | -0.61582200 | -1.31215400 | H | -8.32745800 | -1.09247500 | -0.32920600 |
| C | -4.33973600 | -0.38648100 | -0.90452800 | H | -7.25265600 | -2.06195200 | -1.35729300 |
| C | -2.72708200 | -0.62030100 | -2.68345700 | H | -6.69048900 | -1.48637600 | 0.21910300  |
| C | -5.35122000 | -0.11795700 | -1.83587800 | C | -3.33265600 | -0.28793700 | -5.11501400 |
| C | -3.70334600 | -0.34814600 | -3.63865700 | H | -4.24763000 | -0.46412800 | -5.68693600 |
| C | -5.01892500 | -0.04320500 | -3.20557900 | C | -2.83532200 | 1.12619300  | -5.47228500 |
| H | 1.88618100  | 0.90826100  | 3.11666100  | H | -1.93477500 | 1.36925100  | -4.89570800 |
| H | 1.16336300  | -0.02990900 | 5.27619700  | H | -2.59243000 | 1.19418600  | -6.53907100 |
| H | -2.01268100 | -2.94344900 | -1.96846100 | H | -3.59773200 | 1.87622100  | -5.24209100 |
| H | -0.89328100 | -5.12905200 | -2.18623400 | C | -2.29819000 | -1.34777200 | -5.52701100 |
| H | 1.55861300  | -0.95536000 | -2.40871100 | H | -1.30677400 | -1.14215000 | -5.10572900 |
| H | 3.62018700  | -1.82675000 | 1.24521900  | H | -2.59892800 | -2.35254600 | -5.20826100 |
| H | 4.53578600  | 0.27171200  | 0.37179800  | H | -2.18580200 | -1.35557800 | -6.61664300 |
| H | 1.14013800  | 2.74949600  | 1.24365300  | C | 2.43279400  | 4.96163100  | 2.06024800  |
| H | -1.60326100 | 1.49109100  | 1.83717400  | H | 3.25952100  | 5.61780900  | 2.34385300  |
| H | -3.27757100 | -2.44455700 | 1.52827400  | C | 1.53433500  | 4.75192700  | 3.29288600  |
| H | -4.58652100 | -0.39558800 | 0.15092300  | H | 0.65292300  | 4.14521000  | 3.05217400  |
| H | -1.70504200 | -0.78832800 | -3.00907500 | H | 2.07520800  | 4.24831200  | 4.10263900  |
| N | -5.94900100 | 0.37288200  | -4.21089400 | H | 1.17454600  | 5.71541500  | 3.67167700  |
| C | -6.90082700 | -0.61874400 | -4.68711200 | C | 1.65580700  | 5.65387600  | 0.92596700  |
| H | -6.38522000 | -1.57078000 | -4.85114900 | H | 1.24845300  | 6.61152700  | 1.26999400  |
| H | -7.74518800 | -0.80443100 | -3.99917000 | H | 2.30536700  | 5.84276400  | 0.06618100  |
| H | -7.31778900 | -0.28826000 | -5.64613300 | H | 0.81658600  | 5.03631000  | 0.58101400  |
| C | -6.44008200 | 1.74255100  | -4.13545000 | C | 6.48747400  | 1.93103000  | 1.11397900  |
| H | -5.63254700 | 2.40022500  | -3.80017000 | H | 7.00889500  | 2.79354600  | 1.53156500  |
| H | -6.75208700 | 2.06492700  | -5.13695800 | C | 6.81084500  | 0.73163300  | 2.02692800  |
| H | -7.29870600 | 1.88782800  | -3.45713700 | H | 6.36143400  | -0.19548900 | 1.65103200  |
| N | -4.22555700 | 0.08808200  | 5.30245600  | H | 7.89425300  | 0.57515000  | 2.07900400  |
| N | 5.27714300  | 4.59820400  | 1.84289800  | H | 6.43882400  | 0.89600500  | 3.04436500  |
| N | 4.74351900  | -4.33218600 | -2.41628300 | C | 7.02690700  | 1.70334100  | -0.30935700 |
| C | -3.76797600 | -0.74392000 | 6.40387600  | H | 6.54823500  | 0.83545500  | -0.77895900 |
| H | -3.92841800 | -0.20936200 | 7.34858700  | H | 6.83335500  | 2.57076000  | -0.94692900 |
| H | -4.27057300 | -1.72321700 | 6.48695400  | H | 8.10730700  | 1.52045700  | -0.28515100 |
| H | -2.69344500 | -0.92279600 | 6.29438900  | H | -0.05249600 | -2.18415900 | 5.36172800  |
| C | -5.62094200 | 0.49706300  | 5.34090700  | H | 0.83800100  | -5.81609000 | -0.57658700 |
| H | -5.79725100 | 1.25910200  | 4.57460300  | O | 1.58787600  | -4.34406700 | 1.56925500  |
| H | -6.34011300 | -0.32492300 | 5.17433600  | O | -0.70315300 | -3.63889900 | 3.19354800  |
| H | -5.84139900 | 0.94158400  | 6.31884400  | C | 2.13639100  | -5.65720200 | 1.56273500  |
| C | 6.11592100  | 5.15636800  | 0.79214500  | H | 2.77702300  | -5.81750400 | 0.68644000  |
| H | 6.28427200  | 6.22163300  | 0.99591100  | H | 2.74370700  | -5.73143700 | 2.46540400  |
| H | 7.10512900  | 4.67801600  | 0.68837100  | H | 1.34790500  | -6.41957400 | 1.58917700  |
| H | 5.59480800  | 5.06687900  | -0.16485400 | C | -0.54008500 | -4.52648200 | 4.29656600  |
| C | 5.81804400  | 4.65118800  | 3.19103200  | H | -1.06708700 | -4.17490100 | 5.19081800  |
| H | 6.67965300  | 3.97935400  | 3.35814000  | H | -0.97911800 | -5.47516900 | 3.98307300  |
| H | 6.14405800  | 5.67486800  | 3.41143700  | H | 0.52315600  | -4.66470100 | 4.52658900  |
| H | 5.03662600  | 4.38213800  | 3.90972000  | C | -4.74049600 | -2.46271900 | 3.78695200  |
| C | 4.08934200  | -5.62711500 | -2.51549700 | H | -5.25123100 | -2.11519800 | 4.68608600  |
| H | 3.33713400  | -5.69233200 | -3.32279200 | C | -5.83727600 | -2.79150600 | 2.75680100  |
| H | 4.84324700  | -6.40287800 | -2.69523600 | H | -5.41796400 | -3.18115600 | 1.82213700  |
| H | 3.58482900  | -5.85571000 | -1.57037500 | H | -6.51824400 | -3.55158500 | 3.15590900  |
| C | 5.63494300  | -4.00307000 | -3.52101300 | H | -6.42688200 | -1.90028200 | 2.51586300  |
| H | 6.04751500  | -3.00183300 | -3.36887300 | C | -3.93476500 | -3.71655800 | 4.16867900  |
| H | 6.46929900  | -4.71602500 | -3.53273500 | H | -3.34837200 | -4.08687700 | 3.32129800  |
| H | 5.16325400  | -4.02722100 | -4.51736900 | H | -3.23685900 | -3.49197900 | 4.98175300  |
| C | -6.77341100 | 0.07307200  | -1.31927200 | H | -4.60373700 | -4.51712500 | 4.50434100  |
| H | -7.42438000 | 0.27679200  | -2.17004600 | C | -2.64507700 | 2.22125800  | 4.20067600  |
| C | -6.88162300 | 1.27380700  | -0.36185000 | H | -3.33342100 | 2.23226000  | 5.04946000  |

|    |             |             |             |
|----|-------------|-------------|-------------|
| C  | -1.21296300 | 2.30070100  | 4.76107300  |
| H  | -0.46931500 | 2.23508300  | 3.95825600  |
| H  | -1.05635400 | 3.24615200  | 5.29296300  |
| H  | -1.01911300 | 1.47667000  | 5.45612800  |
| C  | -2.95898500 | 3.43519200  | 3.30677800  |
| H  | -2.26148100 | 3.52026300  | 2.46415800  |
| H  | -3.97289100 | 3.37314800  | 2.89422400  |
| H  | -2.88394500 | 4.36206300  | 3.88614400  |
| C  | 5.32599800  | -3.74194400 | 0.30779700  |
| H  | 5.28883700  | -4.79466100 | 0.00586900  |
| C  | 5.18327500  | -3.67069500 | 1.83710900  |
| H  | 5.41911900  | -2.66854900 | 2.21675100  |
| H  | 4.17206800  | -3.92124900 | 2.17058100  |
| H  | 5.88774300  | -4.36469800 | 2.30760900  |
| C  | 6.70902700  | -3.19539300 | -0.10501300 |
| H  | 6.78753000  | -2.12837400 | 0.13808000  |
| H  | 7.50458100  | -3.72269900 | 0.43405300  |
| H  | 6.88403500  | -3.31855400 | -1.17553600 |
| C  | 2.65979700  | -2.81203700 | -3.99636600 |
| H  | 3.16049600  | -3.73094800 | -4.30422300 |
| C  | 1.15451100  | -3.03034700 | -4.23175600 |
| H  | 0.56870700  | -2.13724800 | -3.98645400 |
| H  | 0.96742500  | -3.26487400 | -5.28561400 |
| H  | 0.77419300  | -3.85207300 | -3.61869500 |
| C  | 3.19180200  | -1.66681900 | -4.88020200 |
| H  | 2.69354400  | -0.72015200 | -4.63992700 |
| H  | 4.26860100  | -1.52264700 | -4.74161600 |
| H  | 3.00929000  | -1.88141500 | -5.93927100 |
| Rh | -0.10369500 | 0.85463900  | -0.91979300 |
| C  | 2.21883000  | 2.48283200  | -2.36693400 |
| C  | 2.31129100  | 3.86970300  | -2.15637900 |
| C  | 3.38130100  | 1.76446200  | -2.69648600 |
| C  | 3.53519100  | 4.52210500  | -2.28781900 |
| H  | 1.41074400  | 4.41603200  | -1.89203700 |
| C  | 4.59984800  | 2.42637300  | -2.83355100 |
| H  | 3.31263600  | 0.69348200  | -2.84611700 |
| C  | 4.68728800  | 3.80633000  | -2.63039400 |
| H  | 3.58939100  | 5.59651900  | -2.13032700 |
| H  | 5.48783000  | 1.85948000  | -3.09944900 |
| H  | 5.63781800  | 4.31922300  | -2.74653300 |
| H  | -0.47887100 | 1.66030800  | 0.31752800  |
| C  | -2.48683700 | 2.92596200  | -2.05246900 |
| C  | -2.84985500 | 3.82429800  | -3.05765800 |
| C  | -3.91370200 | 4.70097600  | -2.83640600 |
| C  | -4.61314800 | 4.67434300  | -1.62658400 |
| C  | -4.23560300 | 3.76939900  | -0.63195300 |
| C  | -3.17171000 | 2.89058100  | -0.83982300 |
| H  | -2.31077900 | 3.82399700  | -3.99990400 |
| H  | -4.19518500 | 5.40386400  | -3.61516100 |
| H  | -5.43982600 | 5.35790900  | -1.45892800 |
| H  | -4.76506200 | 3.74464400  | 0.31595800  |
| H  | -2.87609300 | 2.18566900  | -0.07346900 |
| H  | -0.64767100 | 2.42737400  | -2.68358800 |
| O  | -1.45809100 | 2.02030500  | -2.27912500 |
| O  | 1.01853900  | 1.87316700  | -2.30443900 |

Cartesian coordinates

| ATOM | X           | Y           | Z           |
|------|-------------|-------------|-------------|
| C    | -1.37211000 | -4.16468400 | -0.08198600 |
| C    | -0.62462800 | -2.99919900 | -0.36004200 |
| C    | 0.14621200  | -2.43334400 | 0.67817600  |
| C    | 0.17476500  | -3.03294700 | 1.94775800  |
| C    | -0.57083200 | -4.18278600 | 2.19332700  |
| C    | -1.34752100 | -4.75060500 | 1.18802400  |
| C    | -0.68187200 | -2.48548100 | -1.76688900 |
| C    | -1.41496200 | -1.34165200 | -2.13705800 |
| C    | -0.04618900 | -3.23724800 | -2.77926700 |
| C    | -1.52929400 | -0.96733600 | -3.48233000 |
| C    | -0.13019200 | -2.83805700 | -4.11945100 |
| C    | -0.88327300 | -1.71696200 | -4.46214500 |
| P    | 1.16740000  | -0.94334000 | 0.35270500  |
| P    | -1.94040100 | -0.19477000 | -0.80534800 |
| C    | 2.39149900  | -1.49062300 | -0.87192700 |
| C    | 2.80638200  | -0.67697700 | -1.92106100 |
| C    | 2.96691300  | -2.75779900 | -0.70217100 |
| C    | 3.76369200  | -1.11948400 | -2.84276800 |
| C    | 3.97504700  | -3.20347400 | -1.55496900 |
| C    | 4.37924900  | -2.37447900 | -2.63689300 |
| C    | 2.08090400  | -0.50287600 | 1.86391500  |
| C    | 3.46093200  | -0.33044800 | 1.77758000  |
| C    | 1.42445500  | -0.21965900 | 3.07327400  |
| C    | 4.21169600  | 0.10041600  | 2.87614200  |
| C    | 2.13874100  | 0.21438700  | 4.19291000  |
| C    | 3.54303800  | 0.40549300  | 4.08108500  |
| C    | -3.06047700 | -1.11895000 | 0.28457500  |
| C    | -2.96458300 | -0.98548400 | 1.66980900  |
| C    | -4.08879400 | -1.88807800 | -0.26603500 |
| C    | -3.89051900 | -1.59869100 | 2.51774100  |
| C    | -5.03897300 | -2.51262800 | 0.54780900  |
| C    | -4.92547700 | -2.38332700 | 1.95326800  |
| C    | -2.92912400 | 1.17654600  | -1.49411900 |
| C    | -4.18842200 | 1.47076000  | -0.97325300 |
| C    | -2.30785100 | 2.10941200  | -2.34364500 |
| C    | -4.83376400 | 2.68008600  | -1.26264300 |
| C    | -2.91460200 | 3.32880000  | -2.64906300 |
| C    | -4.17768400 | 3.63156100  | -2.07427200 |
| H    | 0.79099600  | -2.62160700 | 2.73634000  |
| H    | -0.54529600 | -4.64038900 | 3.17755300  |
| H    | -2.11125100 | -0.09761900 | -3.76351700 |
| H    | -0.96345600 | -1.42663200 | -5.50569100 |
| H    | 2.38252000  | 0.31221600  | -2.03765100 |
| H    | 2.63035400  | -3.39047100 | 0.11025300  |
| H    | 3.96630300  | -0.53055800 | 0.84071300  |
| H    | 0.34879100  | -0.34881300 | 3.14080800  |
| H    | -2.14420900 | -0.41358800 | 2.09208400  |
| H    | -4.15316100 | -1.99700300 | -1.34469100 |
| H    | -4.67569200 | 0.76091100  | -0.31503800 |
| H    | -1.33032600 | 1.88487700  | -2.75605500 |
| N    | -4.72066300 | 4.92625100  | -2.35398700 |
| C    | -5.74112400 | 4.99410900  | -3.39028500 |
| H    | -5.43271100 | 4.38665300  | -4.24734300 |
| H    | -6.73746600 | 4.64391100  | -3.06638600 |
| H    | -5.84405600 | 6.03213200  | -3.72825100 |
| C    | -4.89072500 | 5.85119300  | -1.24263800 |
| H    | -4.05615400 | 5.73654400  | -0.54417100 |
| H    | -4.87188800 | 6.87873600  | -1.62679300 |

7-O

B3LYP-D3 SCF energy: -4605.826796 a.u.

B3LYP-D3 enthalpy: -4603.915702 a.u.

B3LYP-D3 free energy: -4604.166499 a.u.

M06 SCF energy in solution: -4604.683358 a.u.

|   |             |             |             |    |             |             |             |
|---|-------------|-------------|-------------|----|-------------|-------------|-------------|
| H | -5.82808900 | 5.72581400  | -0.67432900 | H  | 5.98510600  | -1.42402200 | 1.25422600  |
| N | -5.81899900 | -3.03255200 | 2.86413700  | H  | 7.42393600  | -1.06696000 | 2.21703700  |
| N | 4.21663700  | 0.91393200  | 5.23891800  | H  | 6.06612900  | -1.94875500 | 2.94468400  |
| N | 5.42873200  | -2.87544600 | -3.47430900 | C  | 6.10691800  | 1.33669600  | 1.74162300  |
| C | -5.79058000 | -4.48553700 | 2.92243300  | H  | 5.71127900  | 1.14993300  | 0.73684300  |
| H | -6.15175800 | -4.81335400 | 3.90533300  | H  | 5.71041300  | 2.29932100  | 2.08292300  |
| H | -6.40366000 | -4.99242700 | 2.15724800  | H  | 7.19653600  | 1.42458700  | 1.66382500  |
| H | -4.75703900 | -4.82854800 | 2.80999900  | H  | -1.92624200 | -5.64437300 | 1.39020700  |
| C | -7.11623100 | -2.40791600 | 3.07289800  | H  | 0.37045200  | -3.40125400 | -4.89704300 |
| H | -6.98447900 | -1.32719400 | 3.18992000  | O  | 0.62659600  | -4.34169500 | -2.36195700 |
| H | -7.83903300 | -2.57550700 | 2.25441500  | O  | -2.10424000 | -4.65925200 | -1.11547400 |
| H | -7.56075800 | -2.79764100 | 3.99649900  | C  | 1.33694700  | -5.10461600 | -3.33044600 |
| C | 4.84426600  | 2.22417000  | 5.13393700  | H  | 2.11673900  | -4.50027200 | -3.80842100 |
| H | 4.93561500  | 2.65700700  | 6.13781400  | H  | 1.80229500  | -5.92430400 | -2.78304500 |
| H | 5.84877900  | 2.22256700  | 4.67857400  | H  | 0.66286200  | -5.51328000 | -4.09368200 |
| H | 4.20603700  | 2.88511800  | 4.53918600  | C  | -2.41000900 | -6.05155100 | -1.11623300 |
| C | 4.92811900  | -0.05716100 | 6.05898500  | H  | -3.16446600 | -6.30594900 | -0.36339900 |
| H | 5.89643100  | -0.38145000 | 5.63880800  | H  | -2.81573800 | -6.26512300 | -2.10626400 |
| H | 5.11977700  | 0.37712700  | 7.04741600  | H  | -1.50450000 | -6.64702000 | -0.94818500 |
| H | 4.30557200  | -0.94770100 | 6.19394000  | C  | -6.15881500 | -3.30399300 | -0.11987800 |
| C | 5.01904300  | -3.55008000 | -4.69559100 | H  | -6.87293800 | -3.60457400 | 0.64819900  |
| H | 4.64270500  | -2.87026900 | -5.48107000 | C  | -6.93534500 | -2.44719900 | -1.13760400 |
| H | 5.87258700  | -4.10078200 | -5.10822300 | H  | -6.30545000 | -2.13974500 | -1.97993100 |
| H | 4.23050100  | -4.27622600 | -4.47116600 | H  | -7.77746800 | -3.01664400 | -1.54637600 |
| C | 6.65848000  | -2.10060400 | -3.58151900 | H  | -7.33355400 | -1.54120900 | -0.66765000 |
| H | 6.86955400  | -1.62255400 | -2.62081700 | C  | -5.61031500 | -4.58633900 | -0.77194700 |
| H | 7.48829300  | -2.78104100 | -3.81176800 | H  | -4.83945700 | -4.35369100 | -1.51482200 |
| H | 6.64473700  | -1.31676100 | -4.35582800 | H  | -5.15939200 | -5.23983800 | -0.01760000 |
| C | -6.21029800 | 2.91514300  | -0.65061800 | H  | -6.41338400 | -5.14258100 | -1.26859400 |
| H | -6.61023000 | 3.84960000  | -1.04644200 | C  | -3.74582200 | -1.44006300 | 4.02424300  |
| C | -6.11074500 | 3.05913200  | 0.88095900  | H  | -4.67095800 | -1.80712400 | 4.47537400  |
| H | -5.73328800 | 2.13664000  | 1.33952300  | C  | -2.59820300 | -2.32707300 | 4.54135100  |
| H | -5.43325700 | 3.87351200  | 1.15984300  | H  | -1.64784100 | -2.05817500 | 4.06817300  |
| H | -7.09548500 | 3.26978900  | 1.31321900  | H  | -2.48157300 | -2.22167400 | 5.62599900  |
| C | -7.20239400 | 1.80241600  | -1.03897200 | H  | -2.79187500 | -3.38138300 | 4.31510500  |
| H | -8.19936400 | 2.03106400  | -0.64593100 | C  | -3.56182700 | 0.02975300  | 4.44048300  |
| H | -7.27799800 | 1.70074400  | -2.12699000 | H  | -2.63204900 | 0.46036800  | 4.04914000  |
| H | -6.90061100 | 0.83055300  | -0.63177500 | H  | -4.39040700 | 0.64992500  | 4.07955400  |
| C | -2.19750100 | 4.35151900  | -3.52258200 | H  | -3.52302700 | 0.11393500  | 5.53209100  |
| H | -2.96889200 | 4.95392800  | -4.01013900 | C  | 4.67080600  | -4.53560400 | -1.29205400 |
| C | -1.36728900 | 5.30879400  | -2.64195400 | H  | 4.87491900  | -5.00118700 | -2.26196900 |
| H | -0.57162700 | 4.77034400  | -2.11555600 | C  | 3.83543800  | -5.51883300 | -0.45553500 |
| H | -0.89435300 | 6.08327100  | -3.25686200 | H  | 3.76489500  | -5.20043800 | 0.59179800  |
| H | -2.00267400 | 5.80605400  | -1.90186400 | H  | 2.81435700  | -5.62480800 | -0.83696000 |
| C | -1.32559500 | 3.72011400  | -4.62000100 | H  | 4.31032600  | -6.50566700 | -0.45908400 |
| H | -0.45115200 | 3.19993700  | -4.21245700 | C  | 6.03189400  | -4.29246500 | -0.60713200 |
| H | -1.89470100 | 3.00303400  | -5.22280100 | H  | 5.88900400  | -3.80508400 | 0.36533800  |
| H | -0.94934200 | 4.50163100  | -5.28895800 | H  | 6.55200700  | -5.24234300 | -0.43659200 |
| C | 1.43998300  | 0.48657500  | 5.52379600  | H  | 6.67433400  | -3.65690300 | -1.22116500 |
| H | 2.15086900  | 0.21890600  | 6.31083700  | C  | 4.08204700  | -0.21112600 | -4.02514600 |
| C | 0.17250500  | -0.35299300 | 5.73122600  | H  | 4.67851600  | -0.77923900 | -4.74200200 |
| H | -0.63989700 | -0.04126500 | 5.06624900  | C  | 2.79859600  | 0.23138800  | -4.75800100 |
| H | 0.35620200  | -1.41961300 | 5.56005300  | H  | 2.20958500  | 0.92782900  | -4.15063400 |
| H | -0.19303100 | -0.23178900 | 6.75666500  | H  | 3.05988900  | 0.75079500  | -5.68689600 |
| C | 1.12597300  | 1.98414800  | 5.70657100  | H  | 2.16350400  | -0.62684300 | -5.00599500 |
| H | 0.70265300  | 2.16476400  | 6.70124700  | C  | 4.89878000  | 1.01586900  | -3.57646100 |
| H | 2.02755100  | 2.59369900  | 5.60640100  | H  | 4.33741800  | 1.61783200  | -2.85568800 |
| H | 0.39375400  | 2.32972700  | 4.96736600  | H  | 5.84145700  | 0.71736700  | -3.10539200 |
| C | 5.72474700  | 0.20223700  | 2.71039600  | H  | 5.13319600  | 1.65603900  | -4.43444100 |
| H | 6.16358600  | 0.43397700  | 3.68167900  | Rh | -0.00842900 | 0.89798100  | -0.13650000 |
| C | 6.33128100  | -1.13986500 | 2.25474500  | C  | 2.33547000  | 2.66179400  | -0.82074000 |

|   |             |            |             |   |             |             |             |
|---|-------------|------------|-------------|---|-------------|-------------|-------------|
| C | 3.63953400  | 3.16095300 | -0.59874600 | C | -5.18840300 | -1.41931400 | -1.03449900 |
| C | 4.22686200  | 4.04994400 | -1.49319500 | C | -3.64396700 | -2.21431200 | -2.76493700 |
| C | 3.55263700  | 4.45576800 | -2.65178200 | C | -4.96656500 | -1.98539700 | -2.31059600 |
| C | 2.27392200  | 3.95394800 | -2.89563900 | C | 2.72004400  | -1.49236000 | -0.38638500 |
| C | 1.66948100  | 3.07367100 | -1.99511600 | C | 2.22270000  | -2.09447300 | -1.54757700 |
| H | 4.15125600  | 2.84986200 | 0.30386700  | C | 3.77381300  | -2.09555000 | 0.30032100  |
| H | 5.22549100  | 4.42760000 | -1.28727100 | C | 2.73037700  | -3.30388600 | -2.01726900 |
| H | 4.01790600  | 5.14584400 | -3.34886900 | C | 4.35213700  | -3.28227500 | -0.16929600 |
| H | 1.73059900  | 4.25622800 | -3.78757100 | C | 3.79830000  | -3.91059500 | -1.30883300 |
| H | 0.66041500  | 2.71494000 | -2.17719200 | C | 3.22830900  | 1.39050100  | -0.06541400 |
| H | 0.44714300  | 0.50659400 | -1.54488900 | C | 4.51982700  | 1.11823500  | -0.51235200 |
| C | 1.27898700  | 5.82512500 | 0.68231200  | C | 2.87009900  | 2.71971500  | 0.20513400  |
| C | 0.29578500  | 4.86800200 | 0.90005300  | C | 5.46194800  | 2.14293800  | -0.68827200 |
| C | 0.51519500  | 3.79181700 | 1.77962700  | C | 3.79810400  | 3.75645500  | 0.11335400  |
| C | 1.75145400  | 3.70626800 | 2.44508200  | C | 5.11278400  | 3.46531600  | -0.33768200 |
| C | 2.74133000  | 4.66059900 | 2.24365800  | H | -1.73127900 | -3.62410200 | -0.44899300 |
| C | 2.49247700  | 5.70118100 | 1.35453800  | H | -0.55871500 | -5.69976000 | 0.15855200  |
| H | 1.13092900  | 6.65095100 | -0.00436700 | H | 2.75626900  | 1.79715900  | 2.40279800  |
| H | -0.65119400 | 4.96194400 | 0.37803500  | H | 2.19840300  | 1.81204100  | 4.78795000  |
| H | 1.94905700  | 2.86019600 | 3.09406600  | H | -1.09999000 | 1.91208800  | 1.34417100  |
| H | 3.70619600  | 4.59951100 | 2.73569600  | H | -2.83094400 | -1.79825500 | 2.57003800  |
| F | 3.45447600  | 6.61223600 | 1.13421800  | H | -4.26225700 | -0.62386600 | 0.72825700  |
| C | -0.46760500 | 2.73179700 | 1.98655300  | H | -1.56095500 | -1.99040700 | -2.31309700 |
| H | -0.26316300 | 2.07359800 | 2.82928300  | H | 1.40664900  | -1.61951700 | -2.08549000 |
| C | -1.58908600 | 2.48600400 | 1.25778900  | H | 4.15566600  | -1.63475400 | 1.20653700  |
| H | -1.88936400 | 3.11193500 | 0.42009500  | H | 4.80403300  | 0.09787000  | -0.74296500 |
| H | -2.32502600 | 1.76485500 | 1.59465300  | H | 1.85971500  | 2.94246700  | 0.53696200  |
| O | 1.80717200  | 1.86017400 | 0.10169900  | N | 6.03139500  | 4.55962000  | -0.41329600 |

### 8-ts-O

B3LYP-D3 SCF energy: -4605.818059 a.u.

B3LYP-D3 enthalpy: -4603.909043 a.u.

B3LYP-D3 free energy: -4604.157207 a.u.

M06 SCF energy in solution: -4604.667683 a.u.

Imaginary frequency: -247.12 cm<sup>-1</sup>

### Cartesian coordinates

| ATOM | X           | Y           | Z           |   | X           | Y           | Z           |
|------|-------------|-------------|-------------|---|-------------|-------------|-------------|
| C    | 1.16549500  | -3.52696800 | 2.11229100  | N | 4.25843400  | -5.17327000 | -1.80100900 |
| C    | 0.51827100  | -2.32080700 | 1.76970300  | N | -6.03435100 | -2.34068500 | -3.19787900 |
| C    | -0.52991000 | -2.35846700 | 0.82851700  | N | -3.37721800 | 1.77788300  | 5.38189000  |
| C    | -0.91244200 | -3.58255600 | 0.25799800  | C | 4.14366600  | -6.33391600 | -0.93129600 |
| C    | -0.25460000 | -4.75906000 | 0.60804900  | H | 4.04929200  | -7.23701700 | -1.54808700 |
| C    | 0.78895800  | -4.73918900 | 1.52924100  | H | 4.99721700  | -6.48661400 | -0.24908600 |
| C    | 0.93787500  | -1.09692200 | 2.52217200  | H | 3.23744200  | -6.24021400 | -0.32490700 |
| C    | 1.68542400  | -0.03631700 | 1.97097900  | C | 5.42180800  | -5.15612600 | -2.67483000 |
| C    | 0.62853400  | -1.06217900 | 3.90431000  | H | 5.33405900  | -4.32905600 | -3.38661500 |
| C    | 2.14568300  | 0.99952600  | 2.80200100  | H | 6.38248000  | -5.04329000 | -2.14068200 |
| C    | 1.05719800  | -0.00579700 | 4.71179100  | H | 5.46311600  | -6.09285200 | -3.24381900 |
| C    | 1.83392600  | 1.00687600  | 4.15635400  | C | -6.79004600 | -1.24923700 | -3.79318900 |
| P    | -1.31889900 | -0.77934000 | 0.28688600  | H | -7.26635700 | -1.60182100 | -4.71681400 |
| P    | 1.97010400  | 0.07855200  | 0.14695100  | H | -7.58253800 | -0.83097200 | -3.14730100 |
| C    | -1.93101000 | -0.00297000 | 1.81633000  | H | -6.10402500 | -0.43617700 | -4.04681200 |
| C    | -1.68477500 | 1.34534100  | 2.05831800  | C | -6.78880300 | -3.54341800 | -2.88314200 |
| C    | -2.65697100 | -0.74488200 | 2.75571700  | H | -7.53370100 | -3.41995200 | -2.07677900 |
| C    | -2.13857800 | 1.97950900  | 3.21871700  | H | -7.32261500 | -3.87929100 | -3.78071400 |
| C    | -3.15152000 | -0.14935400 | 3.91644100  | H | -6.09707900 | -4.33765400 | -2.58397900 |
| C    | -2.88340200 | 1.22669600  | 4.15307100  | C | -2.40071700 | 1.89766000  | 6.45279000  |
| C    | -2.78175700 | -1.27590700 | -0.68505200 | H | -1.69110500 | 2.73591200  | 6.32557300  |
| C    | -4.08837600 | -1.06888100 | -0.24434400 | H | -2.92219900 | 2.04090600  | 7.40682100  |
| C    | -2.57463100 | -1.83819800 | -1.95086100 | H | -1.81628000 | 0.97332100  | 6.51939800  |
|      |             |             |             | C | -4.36668400 | 2.84532900  | 5.32604300  |
|      |             |             |             | H | -5.02796300 | 2.68352500  | 4.47023100  |

|   |             |             |             |    |             |             |             |
|---|-------------|-------------|-------------|----|-------------|-------------|-------------|
| H | -4.97802700 | 2.81675400  | 6.23720500  | H  | 4.74350500  | -3.62050000 | 2.56850900  |
| H | -3.94553600 | 3.86127600  | 5.24151100  | H  | 4.46835900  | -5.21005300 | 1.84752500  |
| C | 6.83735600  | 1.77348500  | -1.23349400 | H  | 6.08105800  | -4.78711600 | 2.45594000  |
| H | 7.37298900  | 2.69671300  | -1.46128400 | C  | 2.10942600  | -3.98627700 | -3.23150400 |
| C | 6.74072700  | 0.97856900  | -2.54966900 | H  | 2.91426500  | -4.49399900 | -3.77176700 |
| H | 6.28092200  | -0.00529800 | -2.39981300 | C  | 1.11233400  | -5.06886000 | -2.77297300 |
| H | 6.14670800  | 1.51798800  | -3.29565300 | H  | 0.30727500  | -4.62081700 | -2.18087800 |
| H | 7.74190600  | 0.81336900  | -2.96334000 | H  | 0.66526300  | -5.57323300 | -3.63742000 |
| C | 7.65650500  | 0.99998300  | -0.18248900 | H  | 1.60933300  | -5.82076000 | -2.15433700 |
| H | 8.65529800  | 0.76463500  | -0.56765400 | C  | 1.42966400  | -3.01264700 | -4.20783400 |
| H | 7.77334300  | 1.58031300  | 0.73872300  | H  | 0.51795500  | -2.57221500 | -3.78447000 |
| H | 7.16500000  | 0.05553800  | 0.07605300  | H  | 2.09812700  | -2.19380500 | -4.49902800 |
| C | 3.41899300  | 5.15378800  | 0.58760500  | H  | 1.12863300  | -3.54589300 | -5.11561100 |
| H | 4.20911400  | 5.82949100  | 0.25166700  | C  | -4.00629100 | -0.95482400 | 4.89152900  |
| C | 2.08211700  | 5.65512600  | 0.02090200  | H  | -3.70654600 | -0.66719900 | 5.90573200  |
| H | 1.23243700  | 5.07669200  | 0.40617000  | C  | -3.84019600 | -2.47673300 | 4.75048800  |
| H | 1.91839800  | 6.69830900  | 0.31409300  | H  | -4.31109200 | -2.84941700 | 3.83238800  |
| H | 2.06161000  | 5.60278400  | -1.07254900 | H  | -2.78896600 | -2.77819900 | 4.72832000  |
| C | 3.40301500  | 5.18609100  | 2.12946200  | H  | -4.32907600 | -2.98247000 | 5.58992800  |
| H | 2.63507000  | 4.50910600  | 2.52649400  | C  | -5.49600500 | -0.58503500 | 4.73316800  |
| H | 4.37093500  | 4.87823600  | 2.54003000  | H  | -5.84119700 | -0.81174600 | 3.71686900  |
| H | 3.18311800  | 6.19616900  | 2.49430500  | H  | -6.10999100 | -1.16284000 | 5.43379300  |
| C | -3.35901200 | -2.87783200 | -4.10611700 | H  | -5.66758900 | 0.47563000  | 4.92620300  |
| H | -4.32809600 | -3.12973900 | -4.54443600 | C  | -1.84370400 | 3.46828600  | 3.38163400  |
| C | -2.56256500 | -4.18273600 | -3.92008500 | H  | -2.08496900 | 3.75965100  | 4.40509900  |
| H | -1.56143900 | -3.99304500 | -3.51730500 | C  | -0.35910000 | 3.81362300  | 3.16249100  |
| H | -3.07549200 | -4.86598600 | -3.23334700 | H  | -0.04374000 | 3.62729800  | 2.12857600  |
| H | -2.43842500 | -4.69616300 | -4.88066400 | H  | -0.18499300 | 4.87572800  | 3.36878600  |
| C | -2.63789800 | -1.92313300 | -5.07502800 | H  | 0.28715600  | 3.22046000  | 3.81493600  |
| H | -2.38587200 | -2.43990600 | -6.00838700 | C  | -2.73526400 | 4.29328800  | 2.43081700  |
| H | -3.27682000 | -1.06984600 | -5.32353700 | H  | -2.50956300 | 4.05480600  | 1.38348200  |
| H | -1.70966700 | -1.53007300 | -4.64216400 | H  | -3.79725500 | 4.08625200  | 2.59972000  |
| C | -6.58139600 | -1.20911300 | -0.44927400 | H  | -2.56848500 | 5.36709300  | 2.57490500  |
| H | -7.31964700 | -1.48952600 | -1.20133900 | Rh | 0.12267300  | 0.49100100  | -1.14398300 |
| C | -6.80170600 | -2.12811600 | 0.76846400  | C  | -0.86545600 | 5.42111000  | -1.99619700 |
| H | -6.09622100 | -1.89331900 | 1.57479500  | C  | -0.27123800 | 4.17835800  | -2.15952900 |
| H | -7.81615100 | -2.00513700 | 1.16494500  | C  | -0.51936800 | 3.39874000  | -3.30646900 |
| H | -6.66351800 | -3.18143400 | 0.50018600  | C  | -1.39993100 | 3.90137500  | -4.28351500 |
| C | -6.83823500 | 0.26475900  | -0.08702500 | C  | -2.00594300 | 5.14471800  | -4.13500400 |
| H | -6.16138900 | 0.60949200  | 0.70390200  | C  | -1.73078600 | 5.88298400  | -2.98841600 |
| H | -6.68789500 | 0.91416700  | -0.95445000 | H  | -0.67838500 | 6.03369300  | -1.12115700 |
| H | -7.86505400 | 0.39324100  | 0.27448400  | H  | 0.38830200  | 3.80178300  | -1.38829900 |
| H | 1.30010100  | -5.65706300 | 1.79726800  | H  | -1.61457000 | 3.30625300  | -5.16567900 |
| H | 0.80880800  | 0.02551500  | 5.76526600  | H  | -2.68675100 | 5.54389200  | -4.87839000 |
| O | -0.09240600 | -2.11578200 | 4.37720200  | F  | -2.31370700 | 7.08045400  | -2.82954400 |
| O | 2.16908800  | -3.43009200 | 3.03221200  | C  | 0.02092000  | 2.05299300  | -3.44894600 |
| C | -0.32981100 | -2.19836600 | 5.77716600  | C  | 1.15842300  | 1.56612900  | -2.67217500 |
| H | -0.98435200 | -1.38637000 | 6.11937000  | C  | -2.56271500 | 1.50290700  | -2.50580400 |
| H | -0.83180100 | -3.15304300 | 5.93839800  | C  | -3.45879700 | 1.44841400  | -3.58693700 |
| H | 0.60936000  | -2.18023500 | 6.34447000  | C  | -4.71225600 | 2.04926900  | -3.49170500 |
| C | 2.33889300  | -4.51820800 | 3.93720800  | C  | -5.08967900 | 2.71938200  | -2.32363600 |
| H | 2.81193100  | -5.38325200 | 3.45868000  | C  | -4.20024500 | 2.77677200  | -1.24797100 |
| H | 2.99875500  | -4.15086200 | 4.72556400  | C  | -2.94357800 | 2.18115700  | -1.33799600 |
| H | 1.37505800  | -4.81604500 | 4.36675200  | H  | -3.14954600 | 0.93068800  | -4.48773500 |
| C | 5.57156400  | -3.83859300 | 0.55890800  | H  | -5.39416000 | 2.00338600  | -4.33679800 |
| H | 5.97616700  | -4.66072600 | -0.03360700 | H  | -6.06445800 | 3.19308000  | -2.25449200 |
| C | 6.68975500  | -2.78530300 | 0.67238700  | H  | -4.48045600 | 3.29196500  | -0.33299400 |
| H | 6.39521200  | -1.94624200 | 1.31304800  | H  | -2.24863300 | 2.23313400  | -0.51012800 |
| H | 7.58919900  | -3.23242800 | 1.11030800  | H  | -0.02194300 | 1.75592600  | -0.32022400 |
| H | 6.95396400  | -2.38268500 | -0.31179200 | H  | 1.78822700  | 2.34405800  | -2.24495600 |
| C | 5.19503600  | -4.39666300 | 1.94236300  | H  | -0.15912100 | 1.59810100  | -4.41905000 |

|   |             |            |             |
|---|-------------|------------|-------------|
| H | 1.76456500  | 0.82769900 | -3.20658100 |
| O | -1.34162500 | 0.93204900 | -2.65259100 |

**9-O**

B3LYP-D3 SCF energy: -4605.828610 a.u.

B3LYP-D3 enthalpy: -4603.917587 a.u.

B3LYP-D3 free energy: -4604.164809 a.u.

M06 SCF energy in solution: -4604.679357 a.u.

Cartesian coordinates

| ATOM | X           | Y           | Z           |
|------|-------------|-------------|-------------|
| C    | 0.94611400  | -3.64335000 | 2.15441900  |
| C    | 0.37410800  | -2.41468800 | 1.76930500  |
| C    | -0.62100700 | -2.41818500 | 0.77219200  |
| C    | -1.00368200 | -3.61950800 | 0.15901700  |
| C    | -0.40618300 | -4.81923600 | 0.53995500  |
| C    | 0.56405600  | -4.83919000 | 1.53936500  |
| C    | 0.79678600  | -1.18556300 | 2.51177100  |
| C    | 1.56538200  | -0.13838200 | 1.95928600  |
| C    | 0.42084500  | -1.09913000 | 3.87579100  |
| C    | 1.95046700  | 0.94875800  | 2.76315200  |
| C    | 0.78897500  | -0.00120900 | 4.65710900  |
| C    | 1.56369300  | 1.01025300  | 4.09597200  |
| P    | -1.34072500 | -0.81682100 | 0.22769400  |
| P    | 1.95818400  | -0.03912300 | 0.15305700  |
| C    | -2.07393200 | -0.08804700 | 1.72883100  |
| C    | -1.91752400 | 1.27520100  | 1.96369700  |
| C    | -2.81168000 | -0.85731700 | 2.63629500  |
| C    | -2.46741800 | 1.89765100  | 3.08887900  |
| C    | -3.41522000 | -0.27251200 | 3.75013400  |
| C    | -3.23293200 | 1.11878900  | 3.98385500  |
| C    | -2.74562000 | -1.24407800 | -0.86506600 |
| C    | -4.07426600 | -1.22201800 | -0.44084500 |
| C    | -2.47256700 | -1.51403000 | -2.21216500 |
| C    | -5.12979600 | -1.44980900 | -1.33036700 |
| C    | -3.49650600 | -1.71427800 | -3.13991300 |
| C    | -4.84312400 | -1.65516500 | -2.69902800 |
| C    | 2.57063300  | -1.65797300 | -0.40573600 |
| C    | 2.10046300  | -2.14416400 | -1.63014300 |
| C    | 3.51448800  | -2.39759800 | 0.30965100  |
| C    | 2.52282400  | -3.37206100 | -2.13571500 |
| C    | 4.01778100  | -3.60258600 | -0.19860400 |
| C    | 3.48247700  | -4.11418600 | -1.40362800 |
| C    | 3.34789300  | 1.14690200  | 0.02167900  |
| C    | 4.67068700  | 0.72833500  | -0.13029800 |
| C    | 3.07921300  | 2.51971200  | 0.09782400  |
| C    | 5.72305300  | 1.65115200  | -0.20695600 |
| C    | 4.10061600  | 3.46877000  | 0.06488100  |
| C    | 5.44084700  | 3.03136100  | -0.09205300 |
| H    | -1.77280400 | -3.61958400 | -0.60496500 |
| H    | -0.70345300 | -5.74680300 | 0.05939900  |
| H    | 2.55534800  | 1.74745500  | 2.35528700  |
| H    | 1.86911400  | 1.85467300  | 4.70711400  |
| H    | -1.32605200 | 1.86350500  | 1.27266600  |
| H    | -2.90971400 | -1.92246700 | 2.46229900  |
| H    | -4.30204000 | -1.01504900 | 0.59823200  |
| H    | -1.44030400 | -1.55034100 | -2.55578300 |
| H    | 1.37200000  | -1.56245700 | -2.18824200 |
| H    | 3.86769900  | -2.03261500 | 1.26965500  |
| H    | 4.89654700  | -0.32852600 | -0.20705300 |
| H    | 2.05247300  | 2.85930600  | 0.18195100  |

|   |             |             |             |
|---|-------------|-------------|-------------|
| N | 6.45600800  | 4.04003900  | -0.13658500 |
| C | 7.41433700  | 4.09653400  | 0.95658900  |
| H | 6.90311100  | 3.87501500  | 1.89836900  |
| H | 8.26780100  | 3.40348200  | 0.85939500  |
| H | 7.82117100  | 5.11346100  | 1.02355300  |
| C | 6.97289100  | 4.40006600  | -1.44790500 |
| H | 6.14750800  | 4.45406300  | -2.16402100 |
| H | 7.44090500  | 5.39063200  | -1.39346400 |
| H | 7.72393000  | 3.69505400  | -1.84811600 |
| N | 3.85121400  | -5.38884500 | -1.93798500 |
| N | -5.86552500 | -1.79228200 | -3.69000700 |
| N | -3.83543500 | 1.65737500  | 5.16846800  |
| C | 3.58506000  | -6.57608100 | -1.14083200 |
| H | 3.43110400  | -7.43168000 | -1.81112900 |
| H | 4.38877400  | -6.84850900 | -0.43578000 |
| H | 2.66622800  | -6.42447000 | -0.56613500 |
| C | 5.04982900  | -5.43917600 | -2.76130300 |
| H | 5.07273100  | -4.57254400 | -3.42972600 |
| H | 5.99079400  | -5.44548800 | -2.18220000 |
| H | 5.03013100  | -6.34585000 | -3.37819700 |
| C | -6.73958600 | -0.65286900 | -3.92456500 |
| H | -7.13688600 | -0.71165000 | -4.94601500 |
| H | -7.60134200 | -0.58188400 | -3.23812400 |
| H | -6.15911300 | 0.27019900  | -3.83641000 |
| C | -6.46955600 | -3.10591700 | -3.84219000 |
| H | -7.21481200 | -3.35409400 | -3.06468500 |
| H | -6.97035500 | -3.16496000 | -4.81619900 |
| H | -5.68831400 | -3.87245900 | -3.81595800 |
| C | -2.94675500 | 1.81160500  | 6.30951300  |
| H | -2.25531500 | 2.67041300  | 6.22918100  |
| H | -3.54280000 | 1.94396200  | 7.22040900  |
| H | -2.34201400 | 0.90557400  | 6.42748700  |
| C | -4.85113800 | 2.69255800  | 5.03355400  |
| H | -5.44359000 | 2.50508700  | 4.13359300  |
| H | -5.52543000 | 2.64824500  | 5.89845900  |
| H | -4.45773600 | 3.72106900  | 4.97257400  |
| C | 7.13848000  | 1.11562600  | -0.39841600 |
| H | 7.79986500  | 1.96073800  | -0.59480500 |
| C | 7.24269700  | 0.17642000  | -1.61494400 |
| H | 6.65761700  | -0.74007300 | -1.47532600 |
| H | 6.88435800  | 0.66783600  | -2.52615500 |
| H | 8.28567500  | -0.12036300 | -1.77300200 |
| C | 7.63847100  | 0.42019300  | 0.88239700  |
| H | 8.66753200  | 0.06571600  | 0.75294600  |
| H | 7.61614400  | 1.10171300  | 1.73935700  |
| H | 7.01334800  | -0.44614500 | 1.12549800  |
| C | 3.74396600  | 4.94603900  | 0.15664300  |
| H | 4.67782400  | 5.48391400  | 0.34093100  |
| C | 3.16179200  | 5.44021700  | -1.18177300 |
| H | 2.23631300  | 4.90812800  | -1.42598200 |
| H | 2.92699000  | 6.50951300  | -1.13069200 |
| H | 3.86717600  | 5.28571100  | -2.00568900 |
| C | 2.77296000  | 5.24921900  | 1.31229200  |
| H | 1.78064500  | 4.81528900  | 1.13914300  |
| H | 3.15171300  | 4.86353900  | 2.26585600  |
| H | 2.63644600  | 6.33182800  | 1.41276000  |
| C | -3.14703100 | -1.99572900 | -4.59455300 |
| H | -4.08962100 | -1.98981600 | -5.14820200 |
| C | -2.51219300 | -3.39130700 | -4.74232700 |
| H | -1.56462100 | -3.45754400 | -4.19679600 |
| H | -3.17480400 | -4.17312500 | -4.35383600 |



|   |             |             |             |
|---|-------------|-------------|-------------|
| H | -2.30743100 | -3.61213900 | -5.79645100 |
| C | -2.24294500 | -0.90535000 | -5.19607900 |
| H | -2.04469900 | -1.11648100 | -6.25318100 |
| H | -2.72065800 | 0.07604100  | -5.12229600 |
| H | -1.27436900 | -0.84410200 | -4.68455700 |
| C | -6.54731200 | -1.48453900 | -0.76679600 |
| H | -7.22983400 | -1.76707000 | -1.56977900 |
| C | -6.68274700 | -2.55672400 | 0.33223700  |
| H | -6.06137000 | -2.32245400 | 1.20492000  |
| H | -7.72196400 | -2.62122100 | 0.67412200  |
| H | -6.38173700 | -3.54288600 | -0.03799000 |
| C | -6.98839700 | -0.10393100 | -0.24713400 |
| H | -6.33918900 | 0.23653500  | 0.56923900  |
| H | -6.94943800 | 0.64564800  | -1.04354700 |
| H | -8.01404800 | -0.14700200 | 0.13677500  |
| H | 1.02192400  | -5.77551400 | 1.83837800  |
| H | 0.48530800  | 0.06969200  | 5.69401400  |
| O | -0.31423600 | -2.13973200 | 4.35618500  |
| O | 1.89070100  | -3.58474200 | 3.13826300  |
| C | -0.61611600 | -2.16842200 | 5.74574000  |
| H | -1.29755400 | -1.35360400 | 6.02268000  |
| H | -1.11128000 | -3.12368900 | 5.92372300  |
| H | 0.29480400  | -2.11201300 | 6.35489500  |
| C | 1.94116600  | -4.66792900 | 4.06445200  |
| H | 2.41059100  | -5.55835100 | 3.63094000  |
| H | 2.55324700  | -4.31936100 | 4.89867700  |
| H | 0.93464100  | -4.91691000 | 4.42052500  |
| C | 5.14191100  | -4.30756300 | 0.55395100  |
| H | 5.51511700  | -5.11615800 | -0.07684400 |
| C | 6.32951200  | -3.36097500 | 0.81095300  |
| H | 6.06255200  | -2.56003900 | 1.50967300  |
| H | 7.16687600  | -3.91346600 | 1.25166600  |
| H | 6.67825900  | -2.89661400 | -0.11808800 |
| C | 4.64373900  | -4.92515600 | 1.87171500  |
| H | 4.25265800  | -4.15011100 | 2.53739600  |
| H | 3.83801600  | -5.64373500 | 1.68764400  |
| H | 5.45886200  | -5.44751700 | 2.38554100  |
| C | 1.90479000  | -3.93658600 | -3.40906300 |
| H | 2.66308300  | -4.55202000 | -3.90108400 |
| C | 0.73163400  | -4.86682000 | -3.04078100 |
| H | -0.04470300 | -4.31234800 | -2.50119600 |
| H | 0.28275000  | -5.30086100 | -3.94164100 |
| H | 1.07082300  | -5.68312600 | -2.39637300 |
| C | 1.45375700  | -2.85873700 | -4.40691700 |
| H | 0.59764400  | -2.28266400 | -4.03503100 |
| H | 2.26177200  | -2.15381900 | -4.63440500 |
| H | 1.13414000  | -3.32699600 | -5.34377900 |
| C | -4.30491500 | -1.10525600 | 4.66944700  |
| H | -4.09836100 | -0.79556100 | 5.70006100  |
| C | -4.06631600 | -2.62009400 | 4.56138900  |
| H | -4.44813600 | -3.02085800 | 3.61412500  |
| H | -3.00557800 | -2.87878200 | 4.62496800  |
| H | -4.59863900 | -3.13755100 | 5.36650800  |
| C | -5.79187400 | -0.80083900 | 4.38937400  |
| H | -6.04632000 | -1.05670800 | 3.35302500  |
| H | -6.43505200 | -1.39397300 | 5.04982000  |
| H | -6.02091300 | 0.25448200  | 4.54987800  |
| C | -2.23246400 | 3.39618400  | 3.25823000  |
| H | -2.54059200 | 3.68373100  | 4.26487800  |
| C | -0.74700500 | 3.78190800  | 3.12234200  |
| H | -0.36695600 | 3.60986700  | 2.10812500  |

|    |             |            |             |
|----|-------------|------------|-------------|
| H  | -0.61337000 | 4.84685600 | 3.34405300  |
| H  | -0.12214900 | 3.20286300 | 3.80827400  |
| C  | -3.09224700 | 4.18956300 | 2.25312300  |
| H  | -2.81922800 | 3.93833100 | 1.22044200  |
| H  | -4.15772800 | 3.96923800 | 2.37650900  |
| H  | -2.95007500 | 5.26842900 | 2.38688100  |
| Rh | 0.15783800  | 0.60013900 | -1.05874200 |
| C  | -0.65392800 | 5.53904000 | -0.71616400 |
| C  | -0.62935000 | 4.22745600 | -1.18471300 |
| C  | -0.24783500 | 3.93535400 | -2.50248400 |
| C  | 0.08781800  | 4.99571700 | -3.35320400 |
| C  | 0.07763900  | 6.31511600 | -2.90018900 |
| C  | -0.28773600 | 6.56441400 | -1.58242200 |
| H  | -0.95297000 | 5.77342500 | 0.29976700  |
| H  | -0.93089000 | 3.42667900 | -0.52133300 |
| H  | 0.37260700  | 4.79136000 | -4.38236400 |
| H  | 0.34508400  | 7.14321900 | -3.54743600 |
| F  | -0.29191000 | 7.83238900 | -1.13171800 |
| C  | -0.11545000 | 2.51866600 | -3.00943700 |
| C  | 1.11520700  | 1.77686600 | -2.48929800 |
| C  | -2.53186900 | 2.05085300 | -2.60908200 |
| C  | -3.05334400 | 2.46117500 | -3.83636100 |
| C  | -4.39358700 | 2.84577800 | -3.91059600 |
| C  | -5.20244600 | 2.81986300 | -2.77114600 |
| C  | -4.66192200 | 2.41065300 | -1.55002900 |
| C  | -3.32335000 | 2.02940400 | -1.46409600 |
| H  | -2.42412900 | 2.47778300 | -4.71945100 |
| H  | -4.80361900 | 3.16621100 | -4.86391800 |
| H  | -6.24294800 | 3.12423400 | -2.83400100 |
| H  | -5.27623100 | 2.39286200 | -0.65560900 |
| H  | -2.89535800 | 1.71785000 | -0.51990900 |
| H  | 0.20274500  | 1.76866600 | -0.08986300 |
| H  | 1.91606400  | 2.44431600 | -2.17815800 |
| H  | -0.18398700 | 2.51566900 | -4.10360400 |
| H  | 1.50420100  | 1.05959400 | -3.22761200 |
| O  | -1.20652900 | 1.63551200 | -2.50717400 |

## 2-S

B3LYP-D3 SCF energy: -630.432938 a.u.

B3LYP-D3 enthalpy: -630.327072 a.u.

B3LYP-D3 free energy: -630.363450 a.u.

M06 SCF energy in solution: -630.291818 a.u.

## Cartesian coordinates

| ATOM | X           | Y           | Z           |
|------|-------------|-------------|-------------|
| C    | 0.49915100  | -0.00004000 | -0.00815000 |
| C    | -0.20303900 | 1.21154900  | -0.01006500 |
| C    | -1.59931600 | 1.20876700  | 0.00446700  |
| C    | -2.29886900 | 0.00004600  | 0.01325200  |
| C    | -1.59940100 | -1.20870600 | 0.00463000  |
| C    | -0.20310400 | -1.21157300 | -0.00969900 |
| H    | 0.34519700  | 2.14848800  | -0.02348200 |
| H    | -2.13920700 | 2.15188900  | 0.00602600  |
| H    | -3.38547600 | 0.00008500  | 0.02210900  |
| H    | -2.13934500 | -2.15179600 | 0.00637500  |
| H    | 0.34509700  | -2.14853600 | -0.02259200 |
| H    | 2.53030300  | 0.00484700  | 1.25782100  |
| S    | 2.30443100  | -0.00032700 | -0.07580400 |

## 3-S

B3LYP-D3 SCF energy: -5150.384776 a.u.

B3LYP-D3 enthalpy: -5148.501680 a.u.  
 B3LYP-D3 free energy: -5148.752167 a.u.  
 M06 SCF energy in solution: -5149.275623 a.u.

Cartesian coordinates

| ATOM | X           | Y           | Z           |
|------|-------------|-------------|-------------|
| C    | -0.29125800 | -4.28491000 | 0.96491800  |
| C    | 0.19288200  | -3.11272200 | 0.34717000  |
| C    | 1.05280000  | -2.26766100 | 1.07488500  |
| C    | 1.44270800  | -2.61325300 | 2.37767200  |
| C    | 0.96233500  | -3.78281400 | 2.96214100  |
| C    | 0.08934900  | -4.61723400 | 2.26868800  |
| C    | -0.16898000 | -2.88002500 | -1.08511800 |
| C    | -1.02861700 | -1.85160900 | -1.51504100 |
| C    | 0.37156900  | -3.76323400 | -2.04823300 |
| C    | -1.36891700 | -1.73834200 | -2.87255900 |
| C    | 0.03888900  | -3.63529900 | -3.40046300 |
| C    | -0.84195500 | -2.63201700 | -3.79863500 |
| P    | 1.60999100  | -0.69369800 | 0.29777300  |
| P    | -1.55638400 | -0.53696100 | -0.33024800 |
| C    | 2.59842200  | -1.22353300 | -1.13904700 |
| C    | 2.41813500  | -0.58858700 | -2.36481300 |
| C    | 3.55239100  | -2.24114300 | -1.02001700 |
| C    | 3.18614800  | -0.93437400 | -3.48414900 |
| C    | 4.34875700  | -2.60627000 | -2.10507300 |
| C    | 4.17216200  | -1.93523000 | -3.34604800 |
| C    | 2.78997800  | 0.08919000  | 1.46101600  |
| C    | 4.07118200  | 0.46652500  | 1.05435700  |
| C    | 2.32147600  | 0.52837400  | 2.70657200  |
| C    | 4.87709000  | 1.29314700  | 1.85011200  |
| C    | 3.11376900  | 1.30686400  | 3.55314600  |
| C    | 4.39273600  | 1.72748400  | 3.10573800  |
| C    | -2.39770800 | -1.39201500 | 1.04232200  |
| C    | -2.09006800 | -1.01136700 | 2.35191100  |
| C    | -3.35160000 | -2.38761400 | 0.82494300  |
| C    | -2.72241300 | -1.60088700 | 3.44702600  |
| C    | -4.02697900 | -2.98773900 | 1.89454700  |
| C    | -3.68776400 | -2.61181900 | 3.21561000  |
| C    | -2.82792600 | 0.41862100  | -1.24267600 |
| C    | -4.20684700 | 0.26469500  | -1.09676600 |
| C    | -2.35010400 | 1.37798200  | -2.14541200 |
| C    | -5.10624100 | 1.02861300  | -1.85686600 |
| C    | -3.20721800 | 2.12433500  | -2.95055300 |
| C    | -4.60496700 | 1.91928900  | -2.83716900 |
| H    | 2.12919200  | -1.98580200 | 2.93196600  |
| H    | 1.26841200  | -4.04585100 | 3.97040400  |
| H    | -2.03806100 | -0.95608900 | -3.20781900 |
| H    | -1.11021800 | -2.54157100 | -4.84719100 |
| H    | 1.64451900  | 0.16772600  | -2.45572000 |
| H    | 3.66811800  | -2.74694600 | -0.06770600 |
| H    | 4.44796800  | 0.12698600  | 0.09509000  |
| H    | 1.31325300  | 0.26918500  | 3.01621000  |
| H    | -1.30692700 | -0.27666000 | 2.50764600  |
| H    | -3.56989500 | -2.70440500 | -0.19079200 |
| H    | -4.59565400 | -0.44245900 | -0.37192200 |
| H    | -1.27634500 | 1.52092500  | -2.23789700 |
| N    | -5.45031400 | 2.62072500  | -3.75037200 |
| C    | -6.33208100 | 1.85841100  | -4.62016700 |
| H    | -5.85715700 | 0.90548200  | -4.87019900 |
| H    | -7.32833800 | 1.64354100  | -4.19820700 |
| H    | -6.48368400 | 2.41627500  | -5.55339000 |

|   |             |             |             |
|---|-------------|-------------|-------------|
| C | -5.92991700 | 3.93271600  | -3.35558600 |
| H | -5.10835000 | 4.51274600  | -2.92531000 |
| H | -6.29818900 | 4.46701800  | -4.23955500 |
| H | -6.75138200 | 3.90213600  | -2.61480700 |
| N | -4.26655400 | -3.22730200 | 4.37259600  |
| N | 5.13404600  | 2.59824800  | 3.96838400  |
| N | 5.02902800  | -2.33972900 | -4.42388200 |
| C | -4.00930300 | -4.64111400 | 4.59543500  |
| H | -4.08183200 | -4.85553500 | 5.66949200  |
| H | -4.70064800 | -5.32531900 | 4.07368400  |
| H | -2.99082800 | -4.87618700 | 4.27063300  |
| C | -5.57715300 | -2.75055200 | 4.78557600  |
| H | -5.60087100 | -1.65713800 | 4.73312200  |
| H | -6.41307100 | -3.13779800 | 4.17528300  |
| H | -5.75908300 | -3.04521000 | 5.82632300  |
| C | 5.34022900  | 3.97125400  | 3.53202500  |
| H | 5.51005700  | 4.60600000  | 4.41101400  |
| H | 6.19503800  | 4.11565900  | 2.84862900  |
| H | 4.44115100  | 4.33016700  | 3.02235300  |
| C | 6.22703900  | 2.00058700  | 4.72051200  |
| H | 7.14111000  | 1.81767600  | 4.12760300  |
| H | 6.49580500  | 2.66174800  | 5.55318500  |
| H | 5.89966000  | 1.04364100  | 5.13949500  |
| C | 4.43578300  | -3.22176500 | -5.41636000 |
| H | 3.73995100  | -2.71987800 | -6.11291000 |
| H | 5.23173000  | -3.68411400 | -6.01248100 |
| H | 3.88430400  | -4.02202800 | -4.91025300 |
| C | 5.98180400  | -1.36855800 | -4.94382600 |
| H | 6.36589300  | -0.76063100 | -4.11961200 |
| H | 6.82800800  | -1.90172400 | -5.39557900 |
| H | 5.57505700  | -0.68345800 | -5.70725800 |
| C | -6.59815300 | 0.88256500  | -1.57341100 |
| H | -7.12801700 | 1.64878700  | -2.14318300 |
| C | -6.91660100 | 1.13902600  | -0.08712700 |
| H | -6.46777300 | 0.37886700  | 0.56295700  |
| H | -6.54566600 | 2.11884300  | 0.23575600  |
| H | -7.99978000 | 1.11521100  | 0.07723400  |
| C | -7.12868800 | -0.49345100 | -2.01725300 |
| H | -8.20755400 | -0.56866400 | -1.83930400 |
| H | -6.94513300 | -0.66680100 | -3.08260400 |
| H | -6.64036900 | -1.29863600 | -1.45651500 |
| C | -2.59982000 | 3.11510700  | -3.93368700 |
| H | -3.42454600 | 3.59891800  | -4.46308000 |
| C | -1.78606600 | 4.19908000  | -3.19935700 |
| H | -0.92172800 | 3.76578200  | -2.67977500 |
| H | -1.40728900 | 4.93921400  | -3.91424200 |
| H | -2.39188800 | 4.71909000  | -2.45109000 |
| C | -1.73544500 | 2.39322100  | -4.98497800 |
| H | -0.87541600 | 1.89324200  | -4.52247200 |
| H | -2.31682800 | 1.63469500  | -5.52093400 |
| H | -1.34767900 | 3.10830900  | -5.71976600 |
| C | 2.56786500  | 1.69943500  | 4.92024000  |
| H | 3.37761200  | 2.20591000  | 5.45172100  |
| C | 2.15281100  | 0.46085500  | 5.73648200  |
| H | 1.30380900  | -0.06329800 | 5.28222800  |
| H | 2.98003400  | -0.25268700 | 5.82358100  |
| H | 1.85104100  | 0.75691400  | 6.74755500  |
| C | 1.39773900  | 2.69332100  | 4.79382500  |
| H | 0.98489700  | 2.92977100  | 5.78113900  |
| H | 1.72588500  | 3.63176900  | 4.33542400  |
| H | 0.58568200  | 2.28968200  | 4.17724800  |

|   |             |             |             |                                               |             |            |             |
|---|-------------|-------------|-------------|-----------------------------------------------|-------------|------------|-------------|
| C | 6.23018700  | 1.71875900  | 1.29158100  | H                                             | 3.11842400  | 1.81833200 | -5.61105600 |
| H | 6.76662100  | 2.26905100  | 2.06552100  | Rh                                            | 0.08156500  | 0.95350600 | 0.09043200  |
| C | 7.10594200  | 0.51123700  | 0.90755000  | C                                             | -2.29113600 | 3.84319800 | 0.69629400  |
| H | 6.66537500  | -0.06844000 | 0.08802500  | C                                             | -3.59829700 | 3.63505300 | 0.24628300  |
| H | 8.09368500  | 0.85072300  | 0.57625000  | C                                             | -4.33896300 | 4.71973100 | -0.22293000 |
| H | 7.24407900  | -0.16313200 | 1.75968500  | C                                             | -3.76863000 | 5.99396500 | -0.28427700 |
| C | 6.03848600  | 2.67039600  | 0.09326700  | C                                             | -2.45236700 | 6.18492600 | 0.14336600  |
| H | 5.54034300  | 2.15719500  | -0.73920200 | C                                             | -1.71308800 | 5.11544000 | 0.65018400  |
| H | 5.42819300  | 3.53788600  | 0.36968300  | H                                             | -4.03570900 | 2.64231800 | 0.25616200  |
| H | 7.00523800  | 3.03463100  | -0.27229000 | H                                             | -5.36278900 | 4.56158100 | -0.54688000 |
| H | -0.28279000 | -5.52112900 | 2.73693300  | H                                             | -4.34840800 | 6.83315500 | -0.65748900 |
| H | 0.45323500  | -4.30850000 | -4.14070500 | H                                             | -2.00068600 | 7.17207100 | 0.10438200  |
| O | 1.21731700  | -4.71580800 | -1.56821500 | H                                             | -0.70860200 | 5.27570400 | 1.02397300  |
| O | -1.13325800 | -5.04820100 | 0.21435400  | H                                             | -2.36578000 | 1.73911400 | 1.75696600  |
| C | 1.79795600  | -5.63066000 | -2.48757500 | C                                             | 1.74816100  | 4.19018500 | 0.03541000  |
| H | 2.44324100  | -5.11233200 | -3.20906200 | C                                             | 1.52885100  | 5.34383200 | -0.72253200 |
| H | 2.40393300  | -6.31139700 | -1.88840300 | C                                             | 1.51656100  | 6.58970400 | -0.08919700 |
| H | 1.03180500  | -6.20469900 | -3.02439000 | C                                             | 1.72729300  | 6.67840500 | 1.28815900  |
| C | -1.19964800 | -6.44188400 | 0.49648000  | C                                             | 1.94411100  | 5.51751000 | 2.03872500  |
| H | -1.72451100 | -6.64703600 | 1.43696000  | C                                             | 1.94736000  | 4.26743700 | 1.41861200  |
| H | -1.76580400 | -6.88557800 | -0.32417800 | H                                             | 1.36834500  | 5.26854300 | -1.79361700 |
| H | -0.19409400 | -6.87854900 | 0.53453400  | H                                             | 1.34609100  | 7.48807200 | -0.67528400 |
| C | -5.10546400 | -4.02026200 | 1.58339300  | H                                             | 1.72027000  | 7.64755000 | 1.77819500  |
| H | -5.63215500 | -4.25663100 | 2.50956700  | H                                             | 2.10185600  | 5.58555300 | 3.11127000  |
| C | -6.15696500 | -3.46545000 | 0.60330900  | H                                             | 2.09540400  | 3.36099400 | 1.99595200  |
| H | -5.72975200 | -3.28409200 | -0.38959700 | H                                             | 2.92974300  | 2.17130900 | -0.41284500 |
| H | -6.97713200 | -4.18162400 | 0.48045600  | S                                             | -1.31265500 | 2.49555400 | 1.38622600  |
| H | -6.57939900 | -2.52165500 | 0.96666300  | S                                             | 1.70483000  | 2.59479600 | -0.80083400 |
| C | -4.48710000 | -5.32481200 | 1.04864200  |                                               |             |            |             |
| H | -3.88962200 | -5.13697300 | 0.14994000  |                                               |             |            |             |
| H | -3.82729900 | -5.77568800 | 1.79655600  | <b>4-ts-S</b>                                 |             |            |             |
| H | -5.26920700 | -6.05158900 | 0.80047100  | B3LYP-D3 SCF energy: -5150.360713 a.u.        |             |            |             |
| C | -2.32916900 | -1.20001700 | 4.86357800  | B3LYP-D3 enthalpy: -5148.480714 a.u.          |             |            |             |
| H | -3.18319400 | -1.41418800 | 5.51187200  | B3LYP-D3 free energy: -5148.724923 a.u.       |             |            |             |
| C | -1.15586600 | -2.07186200 | 5.35068700  | M06 SCF energy in solution: -5149.253230 a.u. |             |            |             |
| H | -0.27704900 | -1.92497400 | 4.71274400  | Imaginary frequency: -714.45 cm <sup>-1</sup> |             |            |             |
| H | -0.88259000 | -1.81512900 | 6.38099700  |                                               |             |            |             |
| H | -1.41829300 | -3.13416400 | 5.31786100  | Cartesian coordinates                         |             |            |             |
| C | -1.98778900 | 0.29263300  | 5.00055000  | ATOM X Y Z                                    |             |            |             |
| H | -1.06493800 | 0.55613800  | 4.47041400  | C -0.07237700 -1.19742700 3.65986400          |             |            |             |
| H | -2.79168200 | 0.92887000  | 4.61212600  | C -0.37728800 -0.44539800 2.50276700          |             |            |             |
| H | -1.83242100 | 0.54724100  | 6.05460400  | C -1.18727800 -1.03063700 1.50724400          |             |            |             |
| C | 5.42514800  | -3.67438500 | -1.94546100 | C -1.68488300 -2.32982800 1.69899000          |             |            |             |
| H | 5.48891600  | -4.21637600 | -2.89461800 | C -1.38223800 -3.04477900 2.85406700          |             |            |             |
| C | 5.12644600  | -4.68785700 | -0.82866200 | C -0.57234200 -2.48814900 3.83809800          |             |            |             |
| H | 5.24916800  | -4.24424500 | 0.16689500  | C 0.17250500 0.94222500 2.44824800            |             |            |             |
| H | 4.10561500  | -5.07764400 | -0.89276100 | C 1.16873000 1.34504300 1.53764200            |             |            |             |
| H | 5.82457100  | -5.52937000 | -0.89316300 | C -0.26864100 1.86606300 3.42745100           |             |            |             |
| C | 6.79828700  | -3.01479900 | -1.70419000 | C 1.72419800 2.63223900 1.63708400            |             |            |             |
| H | 6.78305300  | -2.42590800 | -0.77829600 | C 0.26891100 3.15327100 3.49482800            |             |            |             |
| H | 7.58058700  | -3.77666400 | -1.60681000 | C 1.27653200 3.52014500 2.60772500            |             |            |             |
| H | 7.07064600  | -2.35164400 | -2.52913700 | P -1.60782600 -0.11618400 -0.05787300         |             |            |             |
| C | 2.91812100  | -0.19426700 | -4.79082600 | P 1.67370700 0.24340500 0.13165900            |             |            |             |
| H | 3.55856700  | -0.61403000 | -5.56721600 | C -2.22260600 1.49185400 0.54912500           |             |            |             |
| C | 1.46478700  | -0.38150500 | -5.26301100 | C -1.75639600 2.67361100 -0.02340000          |             |            |             |
| H | 0.74636900  | 0.02194000  | -4.54089200 | C -3.13254200 1.55705700 1.61033500           |             |            |             |
| H | 1.30608900  | 0.13273400  | -6.21792400 | C -2.18133300 3.92613200 0.43183500           |             |            |             |
| H | 1.23044100  | -1.44228500 | -5.39636600 | C -3.61254700 2.78202100 2.07276500           |             |            |             |
| C | 3.27065000  | 1.30014600  | -4.65726600 | C -3.12692200 3.97865900 1.48191500           |             |            |             |
| H | 2.64146900  | 1.79074300  | -3.90453000 | C -3.05480400 -1.07179900 -0.67118300         |             |            |             |
| H | 4.31654700  | 1.43403100  | -4.35885600 | C -4.37050500 -0.70775000 -0.38297200         |             |            |             |

|   |             |             |             |   |             |             |             |
|---|-------------|-------------|-------------|---|-------------|-------------|-------------|
| C | -5.44923000 | -1.53908300 | -0.71091200 | H | -5.05618200 | 6.70517300  | 1.82629800  |
| C | -3.87393700 | -3.10964100 | -1.73818800 | H | -3.77168400 | 6.82648900  | 0.60806200  |
| C | -5.20328300 | -2.73940200 | -1.41349700 | C | 7.02710500  | 0.55632700  | -0.06029800 |
| C | 2.09825000  | -1.38220300 | 0.84924100  | H | 7.82159500  | 1.04094500  | -0.63047500 |
| C | 1.63502500  | -2.53957800 | 0.21585100  | C | 7.17389400  | -0.95774700 | -0.28632000 |
| C | 2.90766700  | -1.49798300 | 1.98192500  | H | 6.43854700  | -1.53338300 | 0.28679800  |
| C | 1.97355700  | -3.80921100 | 0.68362200  | H | 7.04458600  | -1.21369700 | -1.34069600 |
| C | 3.29994900  | -2.75378000 | 2.46334200  | H | 8.16914300  | -1.28757400 | 0.03224900  |
| C | 2.80993700  | -3.91543900 | 1.82267600  | C | 7.24021900  | 0.91001400  | 1.42603700  |
| C | 3.25398400  | 0.99834800  | -0.43141300 | H | 8.21908800  | 0.55702200  | 1.77069400  |
| C | 4.51070700  | 0.47553500  | -0.12397200 | H | 7.18769200  | 1.99103000  | 1.59134200  |
| C | 3.18143200  | 2.18642500  | -1.17087900 | H | 6.47246000  | 0.43796600  | 2.04811800  |
| C | 5.68818100  | 1.11617900  | -0.53285900 | C | 4.18672600  | 4.17122900  | -2.35190600 |
| C | 4.32907000  | 2.85123200  | -1.60669500 | H | 5.18293000  | 4.43613000  | -2.71572000 |
| C | 5.59821700  | 2.30757300  | -1.28984500 | C | 3.23981700  | 4.07651200  | -3.56028100 |
| H | -2.32517000 | -2.78720100 | 0.95729500  | H | 2.20843900  | 3.85479600  | -3.26064500 |
| H | -1.77807500 | -4.04750900 | 2.98379500  | H | 3.22738000  | 5.02784900  | -4.10387200 |
| H | 2.51415200  | 2.94635900  | 0.96981600  | H | 3.55404900  | 3.29137000  | -4.25664400 |
| H | 1.71666900  | 4.51107600  | 2.67484800  | C | 3.72959000  | 5.27725400  | -1.37999900 |
| H | -1.02217700 | 2.61683200  | -0.82104500 | H | 2.73833400  | 5.05403300  | -0.96565700 |
| H | -3.45254500 | 0.63904500  | 2.08800200  | H | 4.42908400  | 5.38127000  | -0.54270100 |
| H | -4.57316900 | 0.22919900  | 0.11975300  | H | 3.66818100  | 6.24318000  | -1.89452000 |
| H | -1.80599300 | -2.58868000 | -1.55435700 | C | -3.56683400 | -4.41350600 | -2.46287600 |
| H | 0.97415400  | -2.43015800 | -0.63588300 | H | -4.52094100 | -4.79460400 | -2.83672100 |
| H | 3.23905900  | -0.60116600 | 2.49692000  | C | -2.99591900 | -5.45271500 | -1.47878400 |
| H | 4.58446800  | -0.44284300 | 0.44458600  | H | -2.03874500 | -5.11675400 | -1.06492800 |
| H | 2.21004600  | 2.61809500  | -1.39670900 | H | -3.68012300 | -5.62768000 | -0.64085000 |
| N | 6.74918000  | 3.01065500  | -1.77430800 | H | -2.82449500 | -6.41095600 | -1.98306600 |
| C | 7.57598000  | 3.72754000  | -0.81553300 | C | -2.62053600 | -4.22172400 | -3.66067400 |
| H | 6.93409300  | 4.18329200  | -0.05533500 | H | -2.48171000 | -5.17343600 | -4.18601700 |
| H | 8.32721000  | 3.10566100  | -0.29926400 | H | -3.02006200 | -3.49572800 | -4.37666400 |
| H | 8.11128600  | 4.53366700  | -1.33289000 | H | -1.62900900 | -3.86878800 | -3.35319300 |
| C | 7.44670700  | 2.42177000  | -2.90477500 | C | -6.83631700 | -1.15260500 | -0.20194700 |
| H | 6.71835100  | 2.11153200  | -3.66135600 | H | -7.54733500 | -1.91109700 | -0.53103700 |
| H | 8.10061500  | 3.17667300  | -3.35729900 | C | -6.85611600 | -1.15823900 | 1.33978800  |
| H | 8.07048400  | 1.54415600  | -2.65476900 | H | -6.19569900 | -0.38351200 | 1.74563100  |
| N | 3.11041500  | -5.24038800 | 2.27707500  | H | -7.86827500 | -0.96184400 | 1.71150200  |
| N | -6.25102300 | -3.62481600 | -1.82737200 | H | -6.52447200 | -2.12363300 | 1.73770600  |
| N | -3.61153400 | 5.20966000  | 2.03594700  | C | -7.32560900 | 0.19730800  | -0.75152500 |
| C | 2.65777400  | -5.64334900 | 3.59930200  | H | -6.64192800 | 1.01372900  | -0.49131100 |
| H | 2.49317100  | -6.72879000 | 3.60868600  | H | -7.40643700 | 0.17019400  | -1.84147100 |
| H | 3.35768400  | -5.40771700 | 4.41906300  | H | -8.31147100 | 0.43920500  | -0.33824500 |
| H | 1.70400400  | -5.15354700 | 3.81803400  | H | -0.32959000 | -3.05095000 | 4.73236500  |
| C | 4.38127600  | -5.80417400 | 1.85025600  | H | -0.07792300 | 3.86215800  | 4.23612800  |
| H | 4.54628600  | -5.57550900 | 0.79216600  | O | -1.22818800 | 1.41948200  | 4.28500200  |
| H | 5.25305900  | -5.43028500 | 2.41737200  | O | 0.74632700  | -0.59602100 | 4.57094100  |
| H | 4.35188300  | -6.89488700 | 1.96270300  | C | -1.53912600 | 2.21531300  | 5.42254700  |
| C | -7.16329000 | -3.14416800 | -2.85251100 | H | -2.05624400 | 3.14008900  | 5.13670200  |
| H | -7.68286500 | -4.00073800 | -3.29867500 | H | -2.20843100 | 1.61127600  | 6.03643000  |
| H | -7.93196400 | -2.43495500 | -2.49776200 | H | -0.63650500 | 2.45917100  | 5.99659800  |
| H | -6.58840300 | -2.65053300 | -3.64229600 | C | 0.53154900  | -0.89216300 | 5.94813000  |
| C | -6.82578800 | -4.49506100 | -0.81288900 | H | 0.91312100  | -1.88289300 | 6.22024500  |
| H | -7.55790300 | -4.00235200 | -0.14844500 | H | 1.08872300  | -0.13717800 | 6.50645800  |
| H | -7.33184500 | -5.33648600 | -1.30171900 | H | -0.53455200 | -0.82620300 | 6.19565400  |
| H | -6.02455900 | -4.90009600 | -0.18689300 | C | 4.23742100  | -2.82333300 | 3.66505800  |
| C | -2.73561000 | 5.85551600  | 3.00008600  | H | 4.58701000  | -3.85244500 | 3.76289600  |
| H | -1.87339800 | 6.37926800  | 2.54791700  | C | 5.48834000  | -1.94665000 | 3.47853200  |
| H | -3.30898600 | 6.59013300  | 3.57838700  | H | 5.23562800  | -0.88073100 | 3.45921600  |
| H | -2.34167200 | 5.10586100  | 3.69453000  | H | 6.18642500  | -2.10070900 | 4.30896900  |
| C | -4.37856100 | 6.11642100  | 1.19450000  | H | 6.01000400  | -2.18787800 | 2.54622300  |
| H | -4.98833800 | 5.53640500  | 0.49610000  | C | 3.50128500  | -2.44665300 | 4.96325300  |

|    |             |             |             |
|----|-------------|-------------|-------------|
| H  | 3.11571800  | -1.42423700 | 4.90327900  |
| H  | 2.65022600  | -3.11315900 | 5.13823200  |
| H  | 4.17479800  | -2.51683400 | 5.82525100  |
| C  | 1.40814600  | -5.06238700 | 0.02032200  |
| H  | 2.17272800  | -5.84230400 | 0.08921800  |
| C  | 0.17691400  | -5.56558700 | 0.79863900  |
| H  | -0.61582800 | -4.81095000 | 0.78734200  |
| H  | -0.21616200 | -6.48448700 | 0.34840500  |
| H  | 0.43109300  | -5.77498600 | 1.84097600  |
| C  | 1.05835500  | -4.87968400 | -1.46448700 |
| H  | 0.23331800  | -4.17217600 | -1.61222600 |
| H  | 1.91608100  | -4.52390700 | -2.04547600 |
| H  | 0.73728300  | -5.83526800 | -1.89233700 |
| C  | -4.67707500 | 2.82803000  | 3.16536800  |
| H  | -4.43342900 | 3.66607600  | 3.82765500  |
| C  | -4.75728700 | 1.54845300  | 4.01417100  |
| H  | -5.21168700 | 0.72159400  | 3.45562400  |
| H  | -3.77309900 | 1.21464600  | 4.35180000  |
| H  | -5.38862500 | 1.72511700  | 4.89160600  |
| C  | -6.05951500 | 3.12112400  | 2.54508700  |
| H  | -6.33870200 | 2.32733300  | 1.84065200  |
| H  | -6.82845700 | 3.16454700  | 3.32525200  |
| H  | -6.06346300 | 4.07314800  | 2.00994800  |
| C  | -1.64017700 | 5.17663400  | -0.25652000 |
| H  | -1.85156800 | 6.03581500  | 0.38307400  |
| C  | -0.11489400 | 5.14262200  | -0.46299500 |
| H  | 0.18450700  | 4.36711900  | -1.17872800 |
| H  | 0.23034600  | 6.10158600  | -0.86500200 |
| H  | 0.40940300  | 4.94815500  | 0.47605800  |
| C  | -2.35425800 | 5.40303000  | -1.60474900 |
| H  | -2.13606400 | 4.58367900  | -2.29991200 |
| H  | -3.44047500 | 5.45808200  | -1.48162500 |
| H  | -2.01613000 | 6.33542700  | -2.07122200 |
| Rh | 0.09028000  | 0.14473000  | -1.63727300 |
| C  | -2.92248000 | 0.42183600  | -3.45850000 |
| C  | -4.02186200 | -0.31851900 | -3.91586600 |
| C  | -5.29679700 | 0.24401800  | -3.87622400 |
| C  | -5.48774400 | 1.53226700  | -3.36931100 |
| C  | -4.39517900 | 2.26464700  | -2.90048900 |
| C  | -3.11611300 | 1.71700400  | -2.95852400 |
| H  | -3.87491700 | -1.32270400 | -4.29721500 |
| H  | -6.14651700 | -0.32772900 | -4.23785500 |
| H  | -6.48405000 | 1.96290700  | -3.34077900 |
| H  | -4.53093700 | 3.26681000  | -2.50390000 |
| H  | -2.25887100 | 2.28807100  | -2.62847400 |
| H  | -0.59208800 | -1.15773000 | -2.36310700 |
| C  | 3.22837500  | -0.56603600 | -3.33296200 |
| C  | 4.46408700  | -0.07053300 | -3.75528100 |
| C  | 5.57873900  | -0.91011800 | -3.73463400 |
| C  | 5.45720800  | -2.22695300 | -3.28567900 |
| C  | 4.22057500  | -2.70713000 | -2.84728800 |
| C  | 3.09964400  | -1.87839500 | -2.87333400 |
| H  | 4.55177400  | 0.95710600  | -4.09084200 |
| H  | 6.54202400  | -0.53076000 | -4.06259600 |
| H  | 6.32751900  | -2.87655400 | -3.27011000 |
| H  | 4.12737400  | -3.72634300 | -2.48373000 |
| H  | 2.13501100  | -2.23837200 | -2.53842400 |
| H  | 1.19743300  | -0.02799400 | -4.48695200 |
| S  | 1.79875200  | 0.53163300  | -3.41201600 |
| S  | -1.27042500 | -0.20513600 | -3.68354400 |

## 5-S

B3LYP-D3 SCF energy: -5150.378630 a.u.

B3LYP-D3 enthalpy: -5148.496084 a.u.

B3LYP-D3 free energy: -5148.744810 a.u.

M06 SCF energy in solution: -5149.268479 a.u.

### Cartesian coordinates

| ATOM | X           | Y           | Z           |
|------|-------------|-------------|-------------|
| C    | 0.05573500  | 1.51119700  | 3.52950300  |
| C    | 0.36877900  | 0.66756300  | 2.44120200  |
| C    | 1.18847900  | 1.17060200  | 1.40921800  |
| C    | 1.68585800  | 2.48082700  | 1.48985500  |
| C    | 1.37959100  | 3.28507100  | 2.58411900  |
| C    | 0.56216600  | 2.81057300  | 3.60478100  |
| C    | -0.15751800 | -0.72941000 | 2.49595300  |
| C    | -1.14580500 | -1.22069700 | 1.61981600  |
| C    | 0.31120500  | -1.57299500 | 3.53198900  |
| C    | -1.65454100 | -2.51942300 | 1.79077500  |
| C    | -0.18499100 | -2.87123800 | 3.67803100  |
| C    | -1.17609200 | -3.32856600 | 2.81409800  |
| P    | 1.64532800  | 0.12051800  | -0.04687800 |
| P    | -1.71330700 | -0.20289900 | 0.18216800  |
| C    | 2.35608200  | -1.37537300 | 0.71446000  |
| C    | 2.00092400  | -2.64440200 | 0.26301600  |
| C    | 3.25270500  | -1.25120500 | 1.78351000  |
| C    | 2.53650100  | -3.80005100 | 0.84527200  |
| C    | 3.84756400  | -2.37343400 | 2.35803700  |
| C    | 3.48623200  | -3.66188500 | 1.88195000  |
| C    | 2.98436700  | 1.08580400  | -0.83146100 |
| C    | 4.31337300  | 0.96903600  | -0.42429100 |
| C    | 2.64031800  | 2.09565900  | -1.73561100 |
| C    | 5.29516700  | 1.85906300  | -0.87270900 |
| C    | 3.59477900  | 2.98605300  | -2.22914400 |
| C    | 4.94003000  | 2.86224400  | -1.80297300 |
| C    | -2.24801200 | 1.40271400  | 0.87037500  |
| C    | -1.84451200 | 2.59964400  | 0.27373800  |
| C    | -3.08957800 | 1.45338400  | 1.98732200  |
| C    | -2.28117800 | 3.83850400  | 0.74617600  |
| C    | -3.56757000 | 2.67225400  | 2.48179100  |
| C    | -3.14407700 | 3.87570600  | 1.86804000  |
| C    | -3.20458500 | -1.09052200 | -0.41238700 |
| C    | -4.51071000 | -0.69733700 | -0.12862700 |
| C    | -2.99375300 | -2.27041800 | -1.14369500 |
| C    | -5.60818200 | -1.46071400 | -0.55613200 |
| C    | -4.05633200 | -3.04338500 | -1.60902100 |
| C    | -5.38112700 | -2.62088800 | -1.32909500 |
| H    | 2.32550500  | 2.87300400  | 0.71023900  |
| H    | 1.77836200  | 4.29340500  | 2.63728300  |
| H    | -2.42932000 | -2.89875400 | 1.13885300  |
| H    | -1.57945100 | -4.32872200 | 2.94251700  |
| H    | 1.30107300  | -2.74179700 | -0.55944000 |
| H    | 3.47725400  | -0.26623200 | 2.17377200  |
| H    | 4.59834400  | 0.18727800  | 0.26801100  |
| H    | 1.61215500  | 2.18491000  | -2.07043100 |
| H    | -1.14731600 | 2.57016600  | -0.55580400 |
| H    | -3.37539700 | 0.52989200  | 2.48183900  |
| H    | -4.68890300 | 0.20518700  | 0.44354700  |
| H    | -1.97846100 | -2.60005700 | -1.33985700 |
| N    | -6.43983500 | -3.42971500 | -1.85919100 |
| C    | -7.11824900 | -4.32487400 | -0.93303200 |
| H    | -6.37931200 | -4.79846100 | -0.27863800 |

|   |             |             |             |   |             |             |             |
|---|-------------|-------------|-------------|---|-------------|-------------|-------------|
| H | -7.87288800 | -3.83239200 | -0.29522600 | H | 3.49981700  | 2.85223000  | -4.99932100 |
| H | -7.62502600 | -5.11504500 | -1.50045300 | H | 1.83257000  | 2.78754100  | -4.40287000 |
| C | -7.27819000 | -2.84959600 | -2.89624000 | C | 6.68821800  | 1.75387300  | -0.25763900 |
| H | -6.65547400 | -2.26958900 | -3.58277500 | H | 7.31751600  | 2.53087500  | -0.69305500 |
| H | -7.75207600 | -3.65736800 | -3.46748200 | C | 6.62690400  | 2.02797800  | 1.25860600  |
| H | -8.08140300 | -2.18693000 | -2.52767900 | H | 6.04248600  | 1.26016000  | 1.77898300  |
| N | -3.53982300 | 5.16700300  | 2.34177700  | H | 7.63495200  | 2.02732100  | 1.68871400  |
| N | 5.89167700  | 3.77685500  | -2.35716900 | H | 6.16456500  | 2.99915100  | 1.46750000  |
| N | 4.11590800  | -4.78312500 | 2.51799400  | C | 7.35991500  | 0.40051200  | -0.54575400 |
| C | -3.08741800 | 5.58742000  | 3.65785300  | H | 6.77494000  | -0.43345900 | -0.13991600 |
| H | -3.03880700 | 6.68347000  | 3.68918800  | H | 7.46433700  | 0.23451000  | -1.62127400 |
| H | -3.72832300 | 5.25984000  | 4.49445400  | H | 8.35592300  | 0.36501700  | -0.08987200 |
| H | -2.07880600 | 5.19881300  | 3.83079300  | H | 0.31936200  | 3.44462800  | 4.44999900  |
| C | -4.84872000 | 5.64756500  | 1.92981600  | H | 0.18462400  | -3.52193200 | 4.46056300  |
| H | -4.99544700 | 5.43610200  | 0.86535500  | O | 1.25178400  | -1.04043500 | 4.36011100  |
| H | -5.69250700 | 5.19869100  | 2.48440900  | O | -0.76688300 | 0.98509500  | 4.48107300  |
| H | -4.89695200 | 6.73425000  | 2.06986100  | C | 1.63375600  | -1.78183100 | 5.51274300  |
| C | 6.95747600  | 3.23217500  | -3.18461800 | H | 2.18608300  | -2.68934500 | 5.23829300  |
| H | 7.30048500  | 4.00544600  | -3.88367100 | H | 2.29020000  | -1.12650500 | 6.08614300  |
| H | 7.84030400  | 2.87351500  | -2.62726700 | H | 0.76194300  | -2.04919300 | 6.12277700  |
| H | 6.56486800  | 2.39433300  | -3.76682700 | C | -0.55895400 | 1.39157800  | 5.83062900  |
| C | 6.24340600  | 4.92934900  | -1.54335200 | H | -0.91853100 | 2.41050900  | 6.01511100  |
| H | 6.94102800  | 4.70308600  | -0.71662600 | H | -1.14011900 | 0.70054700  | 6.44398300  |
| H | 6.71153000  | 5.69220400  | -2.17720000 | H | 0.50292800  | 1.32206200  | 6.09475800  |
| H | 5.33475000  | 5.36014900  | -1.10953300 | C | -4.52886700 | 2.65835200  | 3.66645400  |
| C | 3.32264100  | -5.47347500 | 3.52228500  | H | -4.93494100 | 3.66429700  | 3.78555900  |
| H | 2.52858900  | -6.12026900 | 3.10668900  | C | -5.72543300 | 1.72007300  | 3.42731300  |
| H | 3.97979100  | -6.10092800 | 4.13637100  | H | -5.41452300 | 0.66996000  | 3.39860900  |
| H | 2.84427700  | -4.73827200 | 4.17860000  | H | -6.45507900 | 1.82116400  | 4.23842900  |
| C | 4.97791400  | -5.64013800 | 1.71415100  | H | -6.23128100 | 1.94894700  | 2.48278600  |
| H | 5.50802300  | -5.03134700 | 0.97624900  | C | -3.79900500 | 2.28886200  | 4.97033300  |
| H | 5.72475900  | -6.11087600 | 2.36623300  | H | -3.33534500 | 1.30029600  | 4.89036300  |
| H | 4.45360300  | -6.44572500 | 1.17345200  | H | -3.00550500 | 3.00985200  | 5.19035100  |
| C | -7.00063700 | -1.06277100 | -0.07455500 | H | -4.49771700 | 2.27991800  | 5.81484400  |
| H | -7.73564800 | -1.66840900 | -0.60573200 | C | -1.79275200 | 5.11823000  | 0.07573900  |
| C | -7.34440600 | 0.40987500  | -0.35292500 | H | -2.40851700 | 5.93330000  | 0.46399400  |
| H | -6.66968400 | 1.09547500  | 0.17249200  | C | -0.33391300 | 5.41634400  | 0.46664900  |
| H | -7.27775200 | 0.63365600  | -1.42078700 | H | 0.33628800  | 4.62003800  | 0.12419100  |
| H | -8.36381200 | 0.62765300  | -0.01517000 | H | -0.00081600 | 6.35896200  | 0.01680000  |
| C | -7.14181900 | -1.38958700 | 1.42607000  | H | -0.22845000 | 5.49525000  | 1.55336000  |
| H | -8.15302100 | -1.15473900 | 1.77788600  | C | -1.94547300 | 5.08921300  | -1.45409600 |
| H | -6.94811700 | -2.44979900 | 1.62120200  | H | -1.31334400 | 4.32198900  | -1.91805500 |
| H | -6.43320700 | -0.80381200 | 2.02100800  | H | -2.98215300 | 4.89858200  | -1.75114800 |
| C | -3.79091800 | -4.30963800 | -2.41577200 | H | -1.64553200 | 6.05234300  | -1.88155400 |
| H | -4.61906400 | -4.99566300 | -2.21478600 | C | 4.90438400  | -2.20894300 | 3.44670100  |
| C | -3.81261000 | -4.00196400 | -3.92622200 | H | 4.74391300  | -3.00375500 | 4.18363700  |
| H | -3.01982900 | -3.29066800 | -4.18808600 | C | 4.84429500  | -0.85445200 | 4.17247000  |
| H | -3.65104900 | -4.91673900 | -4.50783200 | H | 5.21681300  | -0.04112200 | 3.53777100  |
| H | -4.77583600 | -3.57846700 | -4.22695600 | H | 3.82802500  | -0.59249000 | 4.47839700  |
| C | -2.47977700 | -5.01530300 | -2.03252300 | H | 5.48228600  | -0.88180800 | 5.06228700  |
| H | -1.59631100 | -4.44677500 | -2.34853700 | C | 6.31538700  | -2.41060100 | 2.85535200  |
| H | -2.40781800 | -5.17906100 | -0.95113300 | H | 6.51598600  | -1.66004600 | 2.08032300  |
| H | -2.42442500 | -5.99067500 | -2.52757100 | H | 7.07714400  | -2.29998500 | 3.63595300  |
| C | 3.15938800  | 4.06355500  | -3.21270300 | H | 6.42477900  | -3.40216100 | 2.41150600  |
| H | 4.03849300  | 4.67995400  | -3.41774000 | C | 2.08480300  | -5.15303500 | 0.30170300  |
| C | 2.06453000  | 4.96604800  | -2.61454000 | H | 2.50976900  | -5.93639100 | 0.93021200  |
| H | 1.13840000  | 4.40940500  | -2.42448700 | C | 0.55580200  | -5.31928600 | 0.36040700  |
| H | 2.38546000  | 5.40721800  | -1.66386500 | H | 0.04053100  | -4.57995900 | -0.26237600 |
| H | 1.82086700  | 5.78248700  | -3.30401000 | H | 0.27034100  | -6.31313800 | -0.00301700 |
| C | 2.69909900  | 3.44608100  | -4.54587400 | H | 0.18750500  | -5.20388400 | 1.38365100  |
| H | 2.41221500  | 4.23042100  | -5.25576600 | C | 2.60326300  | -5.37131900 | -1.13312100 |

|    |             |             |             |   |             |             |             |
|----|-------------|-------------|-------------|---|-------------|-------------|-------------|
| H  | 2.16590800  | -4.64312900 | -1.82642700 | C | 2.01735500  | -0.70430900 | 2.84721800  |
| H  | 3.69320300  | -5.27169800 | -1.18314700 | C | 4.78741100  | -1.05604700 | 2.57160500  |
| H  | 2.33622000  | -6.37265500 | -1.48964000 | C | 2.81507100  | -0.70493200 | 3.99094000  |
| Rh | -0.08251100 | -0.29228900 | -1.51860100 | C | 4.21830900  | -0.86967600 | 3.84983300  |
| C  | 3.04866300  | -1.10924300 | -3.22675200 | C | -2.52366800 | -1.81544000 | 0.24973800  |
| C  | 3.59179100  | -0.16492400 | -4.11215600 | C | -2.22124600 | -2.11861400 | 1.57841500  |
| C  | 3.91217100  | -1.94900900 | -2.50708800 | C | -3.40885800 | -2.63572900 | -0.45620700 |
| C  | 4.97182500  | -0.06865200 | -4.27922600 | C | -2.79680100 | -3.21641600 | 2.22240300  |
| H  | 2.92698400  | 0.48104700  | -4.67482800 | C | -4.01014300 | -3.74211400 | 0.15301600  |
| C  | 5.29273600  | -1.84892500 | -2.68008000 | C | -3.68472300 | -4.04649500 | 1.49770200  |
| H  | 3.50635500  | -2.68212600 | -1.82228300 | C | -3.21780700 | 0.85098000  | -0.72441600 |
| C  | 5.82766900  | -0.91481500 | -3.56976600 | C | -4.51631900 | 0.53434000  | -0.32320300 |
| H  | 5.37677400  | 0.65666000  | -4.98012400 | C | -2.96273000 | 2.13352900  | -1.23434900 |
| H  | 5.95136200  | -2.50912000 | -2.12198000 | C | -5.55950100 | 1.46464000  | -0.42372400 |
| H  | 6.90201700  | -0.85293300 | -3.71747000 | C | -3.99080900 | 3.05782900  | -1.43187100 |
| H  | -0.25897700 | 1.22505500  | -1.59830000 | C | -5.30467900 | 2.72630200  | -1.00767000 |
| C  | -3.23363000 | 0.42850900  | -3.35566200 | H | 1.71363800  | -3.12916300 | 1.72616800  |
| C  | -4.39329500 | -0.16157200 | -3.86633800 | H | 0.90303000  | -5.43644100 | 1.43760800  |
| C  | -5.59832100 | 0.54158800  | -3.81502400 | H | -2.30243800 | 0.83850000  | -3.18809000 |
| C  | -5.64422000 | 1.81686600  | -3.24998500 | H | -1.18944700 | 0.50695200  | -5.35350800 |
| C  | -4.48379600 | 2.39106700  | -2.72604000 | H | 2.00019400  | 1.62794500  | -1.64316700 |
| C  | -3.27385600 | 1.70117200  | -2.78037400 | H | 3.27341900  | -2.45216700 | -1.32539600 |
| H  | -4.35152400 | -1.15269300 | -4.30395900 | H | 4.40594900  | -1.06723400 | 0.45929400  |
| H  | -6.50003600 | 0.09196100  | -4.21977900 | H | 0.94271300  | -0.58073400 | 2.94597800  |
| H  | -6.58309600 | 2.36149000  | -3.21363800 | H | -1.50256000 | -1.50644500 | 2.11458900  |
| H  | -4.51881900 | 3.37591500  | -2.27153500 | H | -3.63365900 | -2.40791900 | -1.49415300 |
| H  | -2.37341400 | 2.14412300  | -2.37555500 | H | -4.72572100 | -0.44428200 | 0.09197900  |
| H  | -1.02790900 | 0.32988600  | -4.30141900 | H | -1.95152600 | 2.40413100  | -1.52118200 |
| S  | -1.69608500 | -0.50513700 | -3.48009400 | N | -6.32114300 | 3.71379100  | -1.19818800 |
| S  | 1.27558900  | -1.30685500 | -3.17941000 | C | -7.42427400 | 3.41539000  | -2.09919200 |
|    |             |             |             | H | -7.05475400 | 2.82335200  | -2.94162900 |
|    |             |             |             | H | -8.26278900 | 2.86776500  | -1.63656900 |
|    |             |             |             | H | -7.82499000 | 4.35637000  | -2.49699600 |
|    |             |             |             | C | -6.65567200 | 4.54326600  | -0.05042400 |
|    |             |             |             | H | -5.74083000 | 4.82240800  | 0.48075800  |
|    |             |             |             | H | -7.14298700 | 5.46328000  | -0.39537500 |
|    |             |             |             | H | -7.33225300 | 4.05436400  | 0.67374900  |
|    |             |             |             | N | -4.20874300 | -5.19122500 | 2.17891700  |
|    |             |             |             | N | 4.99660300  | -0.82124200 | 5.05060500  |
|    |             |             |             | N | 5.16119100  | 0.06608400  | -4.64980400 |
|    |             |             |             | C | -3.79788000 | -6.50518600 | 1.71073900  |
|    |             |             |             | H | -3.88364700 | -7.22439300 | 2.53508200  |
|    |             |             |             | H | -4.38443400 | -6.90020800 | 0.86306000  |
|    |             |             |             | H | -2.74741100 | -6.46365700 | 1.40520700  |
|    |             |             |             | C | -5.56141300 | -5.08833200 | 2.70346500  |
|    |             |             |             | H | -5.68941700 | -4.11572700 | 3.18989200  |
|    |             |             |             | H | -6.35455000 | -5.19418100 | 1.94162800  |
|    |             |             |             | H | -5.71710200 | -5.86834300 | 3.45844600  |
|    |             |             |             | C | 5.98162700  | 0.24314200  | 5.18767100  |
|    |             |             |             | H | 6.14050600  | 0.44745700  | 6.25413400  |
|    |             |             |             | H | 6.96615900  | 0.02192100  | 4.74195500  |
|    |             |             |             | H | 5.59757000  | 1.15445800  | 4.72038900  |
|    |             |             |             | C | 5.37543500  | -2.10172900 | 5.62946300  |
|    |             |             |             | H | 6.20694100  | -2.60458100 | 5.10353900  |
|    |             |             |             | H | 5.68019300  | -1.95216100 | 6.67223600  |
|    |             |             |             | H | 4.51361800  | -2.77725100 | 5.62058100  |
|    |             |             |             | C | 4.61400400  | -0.13661300 | -5.98168300 |
|    |             |             |             | H | 3.99331700  | 0.70162500  | -6.34644800 |
|    |             |             |             | H | 5.43600300  | -0.28087300 | -6.69287800 |
|    |             |             |             | H | 3.99713000  | -1.04153900 | -5.99396100 |
|    |             |             |             | C | 6.19833300  | 1.08699600  | -4.56027800 |

#### 7-S

B3LYP-D3 SCF energy: -4928.809006 a.u.

B3LYP-D3 enthalpy: -4926.900674 a.u.

B3LYP-D3 free energy: -4927.151574 a.u.

M06 SCF energy in solution: -4927.671924 a.u.

#### Cartesian coordinates

| ATOM | X           | Y           | Z           |
|------|-------------|-------------|-------------|
| C    | -0.38575000 | -4.06792000 | -1.39008900 |
| C    | 0.06586400  | -2.73935700 | -1.24707800 |
| C    | 0.82835700  | -2.40431800 | -0.11034900 |
| C    | 1.12023800  | -3.37999300 | 0.85636900  |
| C    | 0.66662400  | -4.68578500 | 0.68970800  |
| C    | -0.08442500 | -5.03701600 | -0.42833600 |
| C    | -0.27243600 | -1.78087100 | -2.34185500 |
| C    | -1.21606800 | -0.74664400 | -2.18881600 |
| C    | 0.32723600  | -1.97745400 | -3.60732400 |
| C    | -1.55432900 | 0.06309600  | -3.28421300 |
| C    | 0.01772400  | -1.13627400 | -4.68097800 |
| C    | -0.93101400 | -0.13054700 | -4.51292800 |
| P    | 1.50376100  | -0.70531300 | 0.10653200  |
| P    | -1.82075700 | -0.31151400 | -0.49685400 |
| C    | 2.54198000  | -0.42981500 | -1.35786600 |
| C    | 2.59273500  | 0.79906800  | -2.00806200 |
| C    | 3.33718800  | -1.48964000 | -1.81781700 |
| C    | 3.39603100  | 0.98807800  | -3.13844100 |
| C    | 4.21714300  | -1.31465700 | -2.88511300 |
| C    | 4.24255600  | -0.06245200 | -3.55669000 |
| C    | 2.58516100  | -0.81593900 | 1.56942600  |
| C    | 3.96048400  | -0.98694800 | 1.44362600  |

|   |             |             |             |    |             |             |             |
|---|-------------|-------------|-------------|----|-------------|-------------|-------------|
| H | 6.52372700  | 1.18197800  | -3.52058300 | C  | -4.28552300 | -5.34611900 | -1.77986000 |
| H | 7.06173000  | 0.77118300  | -5.15982400 | H  | -3.76366300 | -4.66491000 | -2.45990800 |
| H | 5.89491500  | 2.08600400  | -4.91330500 | H  | -3.54089000 | -6.03147000 | -1.36101000 |
| C | -6.93547300 | 1.06144900  | 0.09571800  | H  | -5.00378400 | -5.93564200 | -2.36099600 |
| H | -7.57008000 | 1.94923400  | 0.10568000  | C  | -2.44389200 | -3.49721500 | 3.67653000  |
| C | -6.87413300 | 0.54183500  | 1.54509000  | H  | -3.09845600 | -4.30574500 | 4.01130100  |
| H | -6.31900100 | -0.40072900 | 1.61872300  | C  | -0.99232200 | -3.99287400 | 3.80389000  |
| H | -6.39182800 | 1.26953000  | 2.20715600  | H  | -0.28218100 | -3.24709400 | 3.42832300  |
| H | -7.88663900 | 0.35635400  | 1.92062400  | H  | -0.74656600 | -4.20029700 | 4.85188800  |
| C | -7.59014000 | 0.02243000  | -0.83462200 | H  | -0.84148000 | -4.91115700 | 3.22684000  |
| H | -8.58821100 | -0.24758800 | -0.47101600 | C  | -2.69541700 | -2.27106800 | 4.57262200  |
| H | -7.69052100 | 0.40718200  | -1.85482800 | H  | -2.03058300 | -1.43625900 | 4.32018900  |
| H | -6.98852100 | -0.89214300 | -0.87983100 | H  | -3.72838800 | -1.91693400 | 4.48122100  |
| C | -3.69220200 | 4.38562600  | -2.11659400 | H  | -2.51265900 | -2.52319000 | 5.62321700  |
| H | -4.66071300 | 4.81505200  | -2.38675300 | C  | 5.17242700  | -2.43647900 | -3.28412000 |
| C | -2.98930100 | 5.36834200  | -1.16383900 | H  | 5.21383600  | -2.46476800 | -4.37869300 |
| H | -2.00851300 | 4.98976500  | -0.85977300 | C  | 4.74312000  | -3.82545500 | -2.78271800 |
| H | -2.83450500 | 6.33631400  | -1.65482000 | H  | 4.87784200  | -3.92049000 | -1.69782500 |
| H | -3.58322200 | 5.54183700  | -0.25939200 | H  | 3.69348400  | -4.04218400 | -3.00421900 |
| C | -2.87074800 | 4.20118900  | -3.40594300 | H  | 5.36363300  | -4.59687000 | -3.25091900 |
| H | -1.85728600 | 3.83303300  | -3.20177400 | C  | 6.59806600  | -2.12650600 | -2.78089300 |
| H | -3.35413800 | 3.49329900  | -4.08887800 | H  | 6.61078500  | -2.05280000 | -1.68627900 |
| H | -2.76907000 | 5.15947000  | -3.92760500 | H  | 7.28921400  | -2.92600900 | -3.07234800 |
| C | 2.20432700  | -0.43505100 | 5.36085500  | H  | 6.96929200  | -1.18671700 | -3.19411300 |
| H | 2.80757200  | -0.96636300 | 6.10246200  | C  | 3.29665400  | 2.32841600  | -3.85977300 |
| C | 0.75130300  | -0.91013300 | 5.50191700  | H  | 3.86940100  | 2.26330600  | -4.78637600 |
| H | 0.06174100  | -0.31901000 | 4.88564200  | C  | 1.83994900  | 2.63960700  | -4.26017800 |
| H | 0.63580300  | -1.96126000 | 5.21898800  | H  | 1.21136800  | 2.81958200  | -3.38171300 |
| H | 0.42082600  | -0.79885800 | 6.54009400  | H  | 1.80595400  | 3.54468700  | -4.87734100 |
| C | 2.31348500  | 1.07084500  | 5.67570400  | H  | 1.39894800  | 1.81293900  | -4.82807500 |
| H | 1.87271300  | 1.29698600  | 6.65365800  | C  | 3.89078300  | 3.46886200  | -3.00984900 |
| H | 3.35756900  | 1.39496200  | 5.68548500  | H  | 3.34470200  | 3.58923100  | -2.06849900 |
| H | 1.78696000  | 1.65642700  | 4.91232500  | H  | 4.94202700  | 3.27625600  | -2.76995400 |
| C | 6.26973000  | -1.33615500 | 2.34874900  | H  | 3.83152200  | 4.41996200  | -3.55097000 |
| H | 6.75449500  | -1.42771600 | 3.32156400  | Rh | -0.07207300 | 0.84769800  | 0.58879600  |
| C | 6.47629700  | -2.67917300 | 1.62084600  | C  | 1.66677700  | 3.76227100  | 0.28384900  |
| H | 6.04702300  | -2.66252300 | 0.61204100  | C  | 2.56274800  | 4.80213200  | 0.60435800  |
| H | 7.54567300  | -2.89675400 | 1.52148300  | C  | 2.53641000  | 6.01021000  | -0.08853500 |
| H | 6.00859600  | -3.50360900 | 2.17061300  | C  | 1.62147100  | 6.21819000  | -1.12524100 |
| C | 6.95302700  | -0.18272200 | 1.59028100  | C  | 0.73016100  | 5.19801000  | -1.45357800 |
| H | 6.52651000  | -0.05924300 | 0.58758100  | C  | 0.74469800  | 3.98974100  | -0.75315500 |
| H | 6.83388200  | 0.76691800  | 2.12254800  | H  | 3.28079700  | 4.65505200  | 1.40596300  |
| H | 8.02475400  | -0.38116000 | 1.47591500  | H  | 3.23602400  | 6.79554600  | 0.18478300  |
| H | -0.43641600 | -6.05515300 | -0.55039800 | H  | 1.60590000  | 7.15986900  | -1.66560900 |
| H | 0.49466500  | -1.26617200 | -5.64431300 | H  | 0.01198100  | 5.33721100  | -2.25716100 |
| O | 1.19959200  | -3.01759800 | -3.69578800 | H  | 0.02660900  | 3.21970200  | -1.01393100 |
| O | -1.13012000 | -4.32983900 | -2.49958100 | H  | 0.24659200  | 1.24026000  | -0.84516100 |
| C | 1.79273800  | -3.29450800 | -4.95886900 | C  | -1.09172000 | 5.87505700  | 1.76983700  |
| H | 2.44191800  | -2.47047900 | -5.27814000 | C  | -1.44371400 | 4.54126700  | 1.92882800  |
| H | 2.39645400  | -4.19092500 | -4.81637200 | C  | -0.73311600 | 3.70550400  | 2.80914400  |
| H | 1.03177700  | -3.48570000 | -5.72574200 | C  | 0.33289500  | 4.25566100  | 3.54446300  |
| C | -1.03177500 | -5.63119700 | -3.07377800 | C  | 0.69620900  | 5.58995300  | 3.39847800  |
| H | -1.56497100 | -6.38357000 | -2.48186400 | C  | -0.01550500 | 6.37570600  | 2.49887300  |
| H | -1.50287200 | -5.55934200 | -4.05561600 | H  | -1.61415800 | 6.52549400  | 1.07834100  |
| H | 0.01879100  | -5.92469200 | -3.18562100 | H  | -2.26736300 | 4.14281700  | 1.34595400  |
| C | -4.99987600 | -4.57374100 | -0.65666900 | H  | 0.89613300  | 3.62262200  | 4.22238700  |
| H | -5.45489000 | -5.30848600 | 0.00896300  | H  | 1.52566500  | 6.02170900  | 3.94733300  |
| C | -6.14784500 | -3.71050600 | -1.21144700 | F  | 0.34627400  | 7.65728300  | 2.32362000  |
| H | -5.78864500 | -2.96177100 | -1.92675800 | C  | -1.02180900 | 2.28174200  | 2.95441700  |
| H | -6.87902300 | -4.33921800 | -1.73180900 | H  | -0.39683400 | 1.76510700  | 3.68188400  |
| H | -6.66696900 | -3.18373800 | -0.40325700 | C  | -1.97496600 | 1.55106900  | 2.31586000  |



|   |             |            |            |
|---|-------------|------------|------------|
| H | -2.68929200 | 1.99803700 | 1.63215200 |
| H | -2.19223700 | 0.53499500 | 2.62946500 |
| S | 1.82280100  | 2.25375500 | 1.21626700 |

### 8-ts-S

B3LYP-D3 SCF energy: -4928.798445 a.u.

B3LYP-D3 enthalpy: -4926.891845 a.u.

B3LYP-D3 free energy: -4927.143863 a.u.

M06 SCF energy in solution: -4927.658010 a.u.

Imaginary frequency: -142.17 cm<sup>-1</sup>

### Cartesian coordinates

| ATOM | X           | Y           | Z           |
|------|-------------|-------------|-------------|
| C    | -1.93198000 | -4.10472000 | 0.02308700  |
| C    | -1.03364400 | -3.06178200 | -0.27927100 |
| C    | 0.00169600  | -2.77461900 | 0.63270000  |
| C    | 0.12237000  | -3.51928300 | 1.81611300  |
| C    | -0.78693900 | -4.53582300 | 2.09995500  |
| C    | -1.81747900 | -4.83173900 | 1.21122600  |
| C    | -1.17287600 | -2.39659300 | -1.61276500 |
| C    | -1.64091700 | -1.08063100 | -1.80243700 |
| C    | -0.85624400 | -3.17559200 | -2.75290100 |
| C    | -1.79449000 | -0.57300600 | -3.10376800 |
| C    | -0.97897800 | -2.64773900 | -4.04068200 |
| C    | -1.46128900 | -1.35188800 | -4.20549100 |
| P    | 1.14223000  | -1.37698600 | 0.27397700  |
| P    | -1.89081100 | 0.05973600  | -0.36728300 |
| C    | 1.97016000  | -1.81199600 | -1.28422500 |
| C    | 2.17656200  | -0.83547900 | -2.25398900 |
| C    | 2.43442800  | -3.11419400 | -1.50358900 |
| C    | 2.80155000  | -1.13624400 | -3.46958800 |
| C    | 3.10576700  | -3.44600000 | -2.67989000 |
| C    | 3.27878800  | -2.44901300 | -3.67897900 |
| C    | 2.43480800  | -1.38023200 | 1.55964200  |
| C    | 3.78099600  | -1.37211100 | 1.20192300  |
| C    | 2.08126000  | -1.04096800 | 2.87409700  |
| C    | 4.78018800  | -1.01704500 | 2.11690600  |
| C    | 3.04663200  | -0.69020100 | 3.81811000  |
| C    | 4.41218200  | -0.66699000 | 3.43370000  |
| C    | -2.94488400 | -0.78992500 | 0.84859800  |
| C    | -2.57464400 | -0.71732900 | 2.19555900  |
| C    | -4.11224700 | -1.46853700 | 0.49503800  |
| C    | -3.32898600 | -1.33365700 | 3.19254500  |
| C    | -4.92703500 | -2.05660700 | 1.47111600  |
| C    | -4.50806300 | -2.02650100 | 2.82171800  |
| C    | -2.85731400 | 1.46786700  | -1.03003700 |
| C    | -4.20565200 | 1.67089000  | -0.73638800 |
| C    | -2.20183200 | 2.39467500  | -1.85170400 |
| C    | -4.90639000 | 2.77424400  | -1.24463700 |
| C    | -2.87636100 | 3.46975400  | -2.42781100 |
| C    | -4.24790000 | 3.66518100  | -2.12286600 |
| H    | 0.93290400  | -3.32122100 | 2.50678300  |
| H    | -0.68876800 | -5.10534000 | 3.01943700  |
| H    | -2.17926600 | 0.42501600  | -3.26411200 |
| H    | -1.58162100 | -0.94758600 | -5.20655300 |
| H    | 1.83106900  | 0.17415600  | -2.06862900 |
| H    | 2.26773000  | -3.86712500 | -0.74210900 |
| H    | 4.06136700  | -1.59989700 | 0.17981700  |
| H    | 1.03050200  | -1.00782500 | 3.15715800  |
| H    | -1.66399300 | -0.19030700 | 2.46565300  |
| H    | -4.39543500 | -1.53665400 | -0.55116300 |

|   |             |             |             |
|---|-------------|-------------|-------------|
| H | -4.72389800 | 0.97485800  | -0.08705900 |
| H | -1.14485400 | 2.26432600  | -2.06431800 |
| N | -4.89701200 | 4.78726400  | -2.72774900 |
| C | -6.00481500 | 4.54933700  | -3.64015900 |
| H | -5.81282900 | 3.63639800  | -4.21157300 |
| H | -6.99084500 | 4.44876600  | -3.15592300 |
| H | -6.06977000 | 5.38464800  | -4.34911100 |
| C | -4.98455900 | 5.99744200  | -1.92556500 |
| H | -4.02683300 | 6.17460200  | -1.42512900 |
| H | -5.19011000 | 6.85334500  | -2.57975100 |
| H | -5.77198600 | 5.96740300  | -1.15081500 |
| N | -5.21888100 | -2.69078200 | 3.87160200  |
| N | 5.36060800  | -0.23100300 | 4.41564400  |
| N | 3.93517400  | -2.85746400 | -4.88711500 |
| C | -5.35082800 | -4.13773100 | 3.80198800  |
| H | -5.44999700 | -4.53888100 | 4.81889400  |
| H | -6.21665200 | -4.49546200 | 3.21897400  |
| H | -4.44436700 | -4.55977800 | 3.35693500  |
| C | -6.34748900 | -1.98284200 | 4.45656600  |
| H | -6.08307700 | -0.93089200 | 4.60498600  |
| H | -7.26666700 | -2.01818800 | 3.84449900  |
| H | -6.58093500 | -2.41731800 | 5.43621300  |
| C | 5.91971000  | 1.10064200  | 4.23753600  |
| H | 6.31477300  | 1.45811600  | 5.19668500  |
| H | 6.73528500  | 1.16084200  | 3.49535400  |
| H | 5.12551200  | 1.78390600  | 3.91910900  |
| C | 6.25719700  | -1.23257500 | 4.97186300  |
| H | 7.10676800  | -1.50423800 | 4.32061600  |
| H | 6.66983600  | -0.85971600 | 5.91739600  |
| H | 5.69161400  | -2.14491400 | 5.18571400  |
| C | 3.06145700  | -3.18246600 | -6.00271000 |
| H | 2.62319700  | -2.30024700 | -6.50461400 |
| H | 3.62460500  | -3.75029200 | -6.75317600 |
| H | 2.23592500  | -3.81110400 | -5.65106200 |
| C | 5.19498200  | -2.22591100 | -5.25410400 |
| H | 5.76314800  | -1.99534400 | -4.34867900 |
| H | 5.78621900  | -2.92834400 | -5.85579100 |
| H | 5.09241700  | -1.29501400 | -5.83643500 |
| C | -6.36342500 | 2.95652700  | -0.83166200 |
| H | -6.68755400 | 3.94707300  | -1.15614900 |
| C | -6.54229800 | 2.90963400  | 0.69789800  |
| H | -6.31747300 | 1.91712600  | 1.10588800  |
| H | -5.88902100 | 3.63441500  | 1.19612500  |
| H | -7.57944500 | 3.14506100  | 0.96185100  |
| C | -7.26517400 | 1.91432200  | -1.52094400 |
| H | -8.31509100 | 2.06988800  | -1.24731600 |
| H | -7.18345600 | 1.97365800  | -2.61119700 |
| H | -6.98592600 | 0.89901900  | -1.21765000 |
| C | -2.12349900 | 4.38531200  | -3.38415200 |
| H | -2.84167800 | 5.12872200  | -3.73970300 |
| C | -0.97223800 | 5.12515500  | -2.67966100 |
| H | -0.20222200 | 4.42742800  | -2.32673300 |
| H | -0.48659000 | 5.82671900  | -3.36797400 |
| H | -1.33587700 | 5.69532300  | -1.81681000 |
| C | -1.60272700 | 3.60356500  | -4.60553200 |
| H | -0.86318400 | 2.84556500  | -4.31579400 |
| H | -2.42101700 | 3.09225400  | -5.12468500 |
| H | -1.11965200 | 4.28210200  | -5.31812400 |
| C | 2.60466000  | -0.25103500 | 5.20660400  |
| H | 3.51434300  | -0.11585700 | 5.79738000  |
| C | 1.72516800  | -1.30298000 | 5.90358300  |

|   |             |             |             |                             |                   |             |             |
|---|-------------|-------------|-------------|-----------------------------|-------------------|-------------|-------------|
| H | 0.77964100  | -1.46532300 | 5.37365600  | C                           | 1.64117400        | 0.74310800  | -4.74233500 |
| H | 2.24116700  | -2.26723000 | 5.96993400  | H                           | 1.31868300        | 1.30473800  | -3.85734700 |
| H | 1.47793800  | -0.97898300 | 6.92114000  | H                           | 1.77149100        | 1.46465000  | -5.55694700 |
| C | 1.88937000  | 1.11332900  | 5.13093800  | H                           | 0.83175400        | 0.05710400  | -5.00970700 |
| H | 1.62167000  | 1.46896900  | 6.13266100  | C                           | 4.07405300        | 0.95736600  | -4.06006700 |
| H | 2.52712300  | 1.86477900  | 4.65167100  | H                           | 3.82267300        | 1.43887100  | -3.10842100 |
| H | 0.96464200  | 1.04027100  | 4.54403600  | H                           | 5.02932100        | 0.43802700  | -3.93222500 |
| C | 6.21353600  | -0.94812000 | 1.60225200  | H                           | 4.21196400        | 1.74616300  | -4.80916800 |
| H | 6.87004000  | -0.68355500 | 2.43206000  | Rh                          | 0.13284700        | 0.78320800  | 0.51980100  |
| C | 6.69187100  | -2.30797600 | 1.05922200  | C                           | 1.47657300        | 6.55719300  | 0.49463900  |
| H | 6.10134000  | -2.62658100 | 0.19166000  | C                           | 0.83676800        | 5.33256700  | 0.64277900  |
| H | 7.73866800  | -2.24402000 | 0.74126300  | C                           | 0.98910900        | 4.57098000  | 1.81811800  |
| H | 6.61347900  | -3.08878700 | 1.82373900  | C                           | 1.81219300        | 5.07802900  | 2.84670900  |
| C | 6.35166100  | 0.15841900  | 0.53617600  | C                           | 2.44965600        | 6.30396500  | 2.71737900  |
| H | 5.74546600  | -0.06335700 | -0.35008800 | C                           | 2.27490900        | 7.02326500  | 1.53472500  |
| H | 6.02146800  | 1.12774600  | 0.92545000  | H                           | 1.37639600        | 7.14664400  | -0.40972200 |
| H | 7.39548200  | 0.25183800  | 0.21475900  | H                           | 0.21848000        | 4.96276300  | -0.16343800 |
| H | -2.52128500 | -5.62560800 | 1.43535400  | H                           | 1.95594900        | 4.49067300  | 3.75005200  |
| H | -0.71443500 | -3.23578500 | -4.91051900 | H                           | 3.07977500        | 6.71041500  | 3.50094000  |
| O | -0.43495800 | -4.44629700 | -2.50429600 | F                           | 2.90105200        | 8.20211000  | 1.39676000  |
| O | -2.90442600 | -4.34680800 | -0.90286400 | C                           | 0.37298300        | 3.26511800  | 1.97974200  |
| C | -0.19253100 | -5.30580600 | -3.61098400 | C                           | -0.66345700       | 2.70550900  | 1.14278900  |
| H | 0.66501000  | -4.95992100 | -4.20206900 | C                           | 2.87049200        | 2.96681700  | 0.03289800  |
| H | 0.03797000  | -6.28294200 | -3.18514300 | C                           | 3.94426600        | 3.78958600  | 0.42462000  |
| H | -1.07683800 | -5.38954300 | -4.25529800 | C                           | 4.47238400        | 4.73196800  | -0.45445500 |
| C | -3.30584300 | -5.70148300 | -1.09405600 | C                           | 3.94112700        | 4.87751300  | -1.73944700 |
| H | -3.94070100 | -6.06306700 | -0.27716300 | C                           | 2.87988000        | 4.06401900  | -2.13951100 |
| H | -3.88558800 | -5.71354000 | -2.01899400 | C                           | 2.34906900        | 3.11619900  | -1.26397800 |
| H | -2.42892000 | -6.35155100 | -1.19594900 | H                           | 4.35046400        | 3.69388100  | 1.42687300  |
| C | -6.24724500 | -2.68712800 | 1.03977300  | H                           | 5.29697300        | 5.36149500  | -0.13200100 |
| H | -6.81323200 | -2.93923500 | 1.93814500  | H                           | 4.35518400        | 5.61329200  | -2.42249800 |
| C | -7.10923700 | -1.69422200 | 0.23695200  | H                           | 2.46112000        | 4.15948800  | -3.13771100 |
| H | -6.65084500 | -1.44857800 | -0.72779600 | H                           | 1.52320800        | 2.49225900  | -1.58388700 |
| H | -8.09453200 | -2.12700500 | 0.03065200  | H                           | 0.39194200        | 1.15376100  | -0.92231400 |
| H | -7.25589700 | -0.75903600 | 0.78901000  | H                           | -0.98520100       | 3.30776000  | 0.29731900  |
| C | -6.02080500 | -3.98541200 | 0.24597300  | H                           | 0.44356900        | 2.86245800  | 2.98838500  |
| H | -5.42737500 | -3.79460800 | -0.65369700 | H                           | -1.52294200       | 2.35014100  | 1.72348200  |
| H | -5.47968800 | -4.72094000 | 0.85007900  | S                           | 2.25306900        | 1.83316900  | 1.24521400  |
| H | -6.97807000 | -4.42646300 | -0.05472100 |                             |                   |             |             |
| C | -2.85616500 | -1.31569700 | 4.64132100  | <b>9-S</b>                  |                   |             |             |
| H | -3.74391400 | -1.36245000 | 5.27807900  | B3LYP-D3 SCF energy:        | -4928.803923 a.u. |             |             |
| C | -2.01923800 | -2.57661100 | 4.93309700  | B3LYP-D3 enthalpy:          | -4926.895731 a.u. |             |             |
| H | -1.13235100 | -2.60739700 | 4.28995600  | B3LYP-D3 free energy:       | -4927.150074 a.u. |             |             |
| H | -1.68885800 | -2.58980700 | 5.97828100  | M06 SCF energy in solution: | -4927.667200 a.u. |             |             |
| H | -2.60205000 | -3.48289700 | 4.74352200  |                             |                   |             |             |
| C | -2.07308400 | -0.04766800 | 5.01516400  | Cartesian coordinates       |                   |             |             |
| H | -1.09903400 | -0.00384900 | 4.51328700  | ATOM                        | X                 | Y           | Z           |
| H | -2.62767200 | 0.86232800  | 4.75803900  | C                           | -0.40598800       | -4.40018800 | 0.54145900  |
| H | -1.87304200 | -0.03418100 | 6.09181000  | C                           | 0.09627800        | -3.18044000 | 0.04465800  |
| C | 3.69621600  | -4.84120000 | -2.86303500 | C                           | 1.00176400        | -2.44809300 | 0.84034000  |
| H | 3.54176300  | -5.13176100 | -3.90800100 | C                           | 1.37438900        | -2.93201700 | 2.10336900  |
| C | 3.05621900  | -5.91085200 | -1.96330700 | C                           | 0.85199000        | -4.13293200 | 2.57888100  |
| H | 3.35256100  | -5.78505700 | -0.91477900 | C                           | -0.03867400       | -4.87180400 | 1.80462800  |
| H | 1.96335800  | -5.88441700 | -2.00231800 | C                           | -0.29782800       | -2.79705900 | -1.34894800 |
| H | 3.39080800  | -6.90621300 | -2.27451200 | C                           | -1.18854700       | -1.75165500 | -1.66877900 |
| C | 5.21941200  | -4.80585300 | -2.61757400 | C                           | 0.21604100        | -3.59092200 | -2.40374500 |
| H | 5.43298000  | -4.48118600 | -1.59118500 | C                           | -1.54808600       | -1.51626400 | -3.00676200 |
| H | 5.65383600  | -5.80319200 | -2.75349000 | C                           | -0.12382200       | -3.32874400 | -3.73352600 |
| H | 5.71828600  | -4.12073500 | -3.30634800 | C                           | -1.01467800       | -2.29864400 | -4.02379800 |
| C | 2.95912500  | -0.01575100 | -4.49294000 | P                           | 1.59707000        | -0.80470100 | 0.25189900  |
| H | 3.24878700  | -0.45985300 | -5.44712700 | P                           | -1.78127400       | -0.56537200 | -0.38520800 |

|   |             |             |             |   |             |             |             |
|---|-------------|-------------|-------------|---|-------------|-------------|-------------|
| C | 2.44549200  | -1.14210600 | -1.32253600 | H | 7.38547200  | 0.12336000  | 4.38382400  |
| C | 2.24508400  | -0.28422300 | -2.40025900 | H | 6.88792700  | 1.03750800  | 5.82486300  |
| C | 3.28808200  | -2.24971100 | -1.47232300 | H | 5.91956800  | -0.34278500 | 5.27568500  |
| C | 2.83064900  | -0.52692500 | -3.64750000 | C | 3.49919300  | -2.70176700 | -5.98263600 |
| C | 3.93225800  | -2.50359800 | -2.68315200 | H | 2.76120600  | -2.06700700 | -6.50698100 |
| C | 3.68666300  | -1.64171400 | -3.78729300 | H | 4.14028800  | -3.16761000 | -6.74079600 |
| C | 2.89281300  | -0.28536800 | 1.43494600  | H | 2.94854500  | -3.49651500 | -5.46760800 |
| C | 4.24362600  | -0.22287700 | 1.09803400  | C | 5.27666200  | -1.04997300 | -5.61100100 |
| C | 2.48685500  | 0.20270800  | 2.68421900  | H | 5.82186600  | -0.53849100 | -4.81293300 |
| C | 5.19400200  | 0.30932700  | 1.97978200  | H | 6.00371200  | -1.60894300 | -6.21432800 |
| C | 3.39619100  | 0.75733400  | 3.58505800  | H | 4.82785800  | -0.28084200 | -6.26175200 |
| C | 4.76784300  | 0.81613900  | 3.22790200  | C | -6.98665100 | 0.53049800  | -0.86826500 |
| C | -2.43465500 | -1.51322000 | 1.02194700  | H | -7.64769400 | 1.30708400  | -1.25665800 |
| C | -2.07240600 | -1.09209700 | 2.30582600  | C | -7.11054400 | 0.56825500  | 0.66702800  |
| C | -3.30322100 | -2.59498800 | 0.87548500  | H | -6.53588600 | -0.23472200 | 1.14356200  |
| C | -2.52861100 | -1.75109700 | 3.44513700  | H | -6.75328500 | 1.52230500  | 1.07006800  |
| C | -3.83736600 | -3.24446200 | 1.99618500  | H | -8.15815400 | 0.44193500  | 0.96266200  |
| C | -3.40996200 | -2.84972600 | 3.28529000  | C | -7.47114700 | -0.82178300 | -1.42594200 |
| C | -3.18834500 | 0.33214200  | -1.13613800 | H | -8.50356600 | -1.02016600 | -1.11586500 |
| C | -4.51618600 | 0.08602500  | -0.78652700 | H | -7.43321500 | -0.83819200 | -2.52028000 |
| C | -2.91341200 | 1.34746700  | -2.06004200 | H | -6.84584100 | -1.64220500 | -1.05528700 |
| C | -5.56668200 | 0.83411900  | -1.33585300 | C | -3.55579600 | 3.17067800  | -3.66319600 |
| C | -3.92950500 | 2.09137800  | -2.65638700 | H | -4.49318700 | 3.59154800  | -4.03637600 |
| C | -5.27602800 | 1.83120200  | -2.29535900 | C | -2.75151500 | 4.30315800  | -2.99575200 |
| H | 2.07939200  | -2.37883200 | 2.71266500  | H | -1.77900000 | 3.94648600  | -2.63277500 |
| H | 1.14399500  | -4.49733900 | 3.55948400  | H | -2.55770500 | 5.11132800  | -3.71066200 |
| H | -2.24605800 | -0.72829600 | -3.25792400 | H | -3.29468200 | 4.72664700  | -2.14291100 |
| H | -1.29773300 | -2.10904300 | -5.05529600 | C | -2.78495200 | 2.58463000  | -4.86078000 |
| H | 1.59879800  | 0.57605900  | -2.27503000 | H | -1.82097300 | 2.15814100  | -4.55414100 |
| H | 3.43096900  | -2.91683700 | -0.63039100 | H | -3.36043700 | 1.79184000  | -5.35143800 |
| H | 4.56991800  | -0.58659900 | 0.13009500  | H | -2.57979000 | 3.36475800  | -5.60301100 |
| H | 1.43305100  | 0.16428100  | 2.95773400  | C | 2.89135400  | 1.30398800  | 4.91311100  |
| H | -1.40216400 | -0.24318800 | 2.41446700  | H | 3.75526300  | 1.74432000  | 5.41774200  |
| H | -3.57512200 | -2.93285000 | -0.12007700 | C | 2.33622000  | 0.17854200  | 5.80510000  |
| H | -4.74606800 | -0.68291800 | -0.05841000 | H | 1.47010400  | -0.30981800 | 5.34378400  |
| H | -1.88252900 | 1.56560300  | -2.32099100 | H | 3.09490600  | -0.59072900 | 5.98782900  |
| N | -6.28636600 | 2.62349500  | -2.92782100 | H | 2.01584900  | 0.57722500  | 6.77480700  |
| C | -7.24855500 | 1.95828300  | -3.79299100 | C | 1.84478600  | 2.41593700  | 4.70715800  |
| H | -6.74555900 | 1.15847500  | -4.34475100 | H | 1.55307400  | 2.84993400  | 5.67062700  |
| H | -8.11626400 | 1.51980800  | -3.27130500 | H | 2.23603000  | 3.21592400  | 4.06909600  |
| H | -7.63366500 | 2.68210300  | -4.52241800 | H | 0.93368300  | 2.02843800  | 4.23364100  |
| C | -6.79009800 | 3.75945300  | -2.17149000 | C | 6.65195500  | 0.31989500  | 1.53204200  |
| H | -5.95206300 | 4.28770700  | -1.70504300 | H | 7.26201100  | 0.71476600  | 2.34537600  |
| H | -7.29342500 | 4.45514500  | -2.85373300 | C | 7.16044800  | -1.10485900 | 1.23858900  |
| H | -7.50684900 | 3.48982100  | -1.37486500 | H | 6.62105200  | -1.56064100 | 0.39960500  |
| N | -3.81496500 | -3.52556400 | 4.47988800  | H | 8.22414300  | -1.08283100 | 0.97581200  |
| N | 5.66515300  | 1.41387700  | 4.17168300  | H | 7.03626700  | -1.75664000 | 2.11042200  |
| N | 4.32531700  | -1.98414400 | -5.02539300 | C | 6.85267500  | 1.24284000  | 0.31463100  |
| C | -3.45954100 | -4.92822100 | 4.63024400  | H | 6.28483200  | 0.88594700  | -0.55284200 |
| H | -3.37320800 | -5.16430300 | 5.69876300  | H | 6.52186800  | 2.26387200  | 0.53439700  |
| H | -4.18210900 | -5.63744100 | 4.19181500  | H | 7.91071800  | 1.27838800  | 0.03070000  |
| H | -2.48548500 | -5.10389600 | 4.16323200  | H | -0.44250500 | -5.80689600 | 2.17655300  |
| C | -5.09139300 | -3.13525300 | 5.05938800  | H | 0.28841700  | -3.92282400 | -4.53951600 |
| H | -5.19165400 | -2.04565800 | 5.02583700  | O | 1.04230800  | -4.60827200 | -2.03369100 |
| H | -5.96826700 | -3.57215300 | 4.54852700  | O | -1.26923000 | -5.07232400 | -0.27575500 |
| H | -5.12528000 | -3.44903400 | 6.10981400  | C | 1.47105100  | -5.52643300 | -3.03175800 |
| C | 6.24933000  | 2.69891000  | 3.81945300  | H | 2.14496900  | -5.04624300 | -3.75260300 |
| H | 6.58579900  | 3.20287500  | 4.73406600  | H | 2.01540500  | -6.30960000 | -2.50286500 |
| H | 7.11211400  | 2.64345000  | 3.13280300  | H | 0.61797400  | -5.96950200 | -3.56095100 |
| H | 5.48452300  | 3.32520800  | 3.34925000  | C | -1.20337500 | -6.49656000 | -0.26783000 |
| C | 6.51264000  | 0.51307100  | 4.93762300  | H | -1.66615400 | -6.92603800 | 0.62798200  |

|    |             |             |             |
|----|-------------|-------------|-------------|
| H  | -1.76489100 | -6.82677000 | -1.14404100 |
| H  | -0.16303700 | -6.83403000 | -0.34386900 |
| C  | -4.88105600 | -4.33539400 | 1.77919600  |
| H  | -5.29914200 | -4.60415300 | 2.75077900  |
| C  | -6.05332400 | -3.82721400 | 0.91772700  |
| H  | -5.73673400 | -3.60919700 | -0.10870300 |
| H  | -6.84147700 | -4.58648400 | 0.86308800  |
| H  | -6.48825400 | -2.91320400 | 1.33763700  |
| C  | -4.25748500 | -5.60152400 | 1.16675500  |
| H  | -3.79654700 | -5.37976500 | 0.19916200  |
| H  | -3.47836000 | -6.00729300 | 1.82056100  |
| H  | -5.01939500 | -6.37567400 | 1.02035800  |
| C  | -2.03535600 | -1.33800400 | 4.82701700  |
| H  | -2.84222500 | -1.53405700 | 5.53901400  |
| C  | -0.83888900 | -2.21918300 | 5.23737600  |
| H  | -0.01163200 | -2.09733500 | 4.52899400  |
| H  | -0.48139400 | -1.94629400 | 6.23708700  |
| H  | -1.11981900 | -3.27613500 | 5.24794600  |
| C  | -1.66825200 | 0.15077300  | 4.92991500  |
| H  | -0.76998300 | 0.39212100  | 4.34799200  |
| H  | -2.48246100 | 0.79619400  | 4.58018000  |
| H  | -1.44745700 | 0.41093500  | 5.97044500  |
| C  | 4.91785700  | -3.66316800 | -2.80393900 |
| H  | 4.75034400  | -4.13952600 | -3.77671600 |
| C  | 4.75946900  | -4.73027000 | -1.70848600 |
| H  | 5.11180000  | -4.36276600 | -0.73676500 |
| H  | 3.71997800  | -5.04631500 | -1.58402900 |
| H  | 5.36301400  | -5.60966600 | -1.95740800 |
| C  | 6.36799300  | -3.13561000 | -2.79661700 |
| H  | 6.57990000  | -2.61415500 | -1.85462100 |
| H  | 7.07805700  | -3.96575000 | -2.88878300 |
| H  | 6.54580000  | -2.44277200 | -3.62131000 |
| C  | 2.52796000  | 0.44537600  | -4.78437900 |
| H  | 2.86813600  | -0.00206500 | -5.71997600 |
| C  | 1.01941300  | 0.71314100  | -4.94815300 |
| H  | 0.60133300  | 1.24454900  | -4.08437900 |
| H  | 0.84176900  | 1.33658800  | -5.83194200 |
| H  | 0.45945600  | -0.21955100 | -5.06060000 |
| C  | 3.29399300  | 1.76804300  | -4.58267200 |
| H  | 2.97412100  | 2.26616400  | -3.65971500 |
| H  | 4.37336500  | 1.59844100  | -4.51470800 |
| H  | 3.10813400  | 2.45422300  | -5.41763500 |
| Rh | -0.14004400 | 0.88470500  | 0.30558900  |
| C  | -1.25775000 | 6.98769300  | 0.51618700  |
| C  | -1.18860200 | 5.59668000  | 0.46960300  |
| C  | -0.72583800 | 4.86075900  | 1.57025700  |
| C  | -0.32227100 | 5.55457600  | 2.72296600  |
| C  | -0.38225000 | 6.94422300  | 2.78591300  |
| C  | -0.85145200 | 7.64027900  | 1.67479400  |
| H  | -1.61287900 | 7.56846600  | -0.32822600 |
| H  | -1.48980100 | 5.08745200  | -0.43813000 |
| H  | 0.05029100  | 4.99789400  | 3.57991500  |
| H  | -0.07963900 | 7.49212700  | 3.67183900  |
| F  | -0.91146400 | 8.98318100  | 1.72449200  |
| C  | -0.57364400 | 3.37111900  | 1.52187800  |
| C  | -1.44185500 | 2.51499200  | 0.62332200  |
| C  | 1.48328900  | 3.96241700  | -0.44507400 |
| C  | 2.09362900  | 5.19317800  | -0.16259500 |
| C  | 2.29043600  | 6.12427900  | -1.18249200 |
| C  | 1.88746400  | 5.83376000  | -2.48751900 |
| C  | 1.28651500  | 4.60546000  | -2.77148000 |

|   |             |            |             |
|---|-------------|------------|-------------|
| C | 1.08393400  | 3.67105600 | -1.75526100 |
| H | 2.39370600  | 5.42618700 | 0.85403700  |
| H | 2.75581000  | 7.07844100 | -0.95374500 |
| H | 2.04329800  | 6.55968700 | -3.28015300 |
| H | 0.97406600  | 4.36742300 | -3.78422300 |
| H | 0.61183200  | 2.72303100 | -1.97866900 |
| H | -0.07994000 | 1.20226900 | -1.17128500 |
| H | -1.70179900 | 3.00429200 | -0.31417200 |
| H | -0.55941900 | 2.97306300 | 2.54265700  |
| H | -2.36444500 | 2.19487900 | 1.12157700  |
| S | 1.22899800  | 2.85684800 | 0.94646200  |

### 8-ts-Regio

B3LYP-D3 SCF energy: -4539.842243 a.u.

B3LYP-D3 enthalpy: -4537.934128 a.u.

B3LYP-D3 free energy: -4538.182793 a.u.

M06 SCF energy in solution: -4538.806615 a.u

Imaginary frequency: -151.32 cm<sup>-1</sup>

### Cartesian coordinates

| ATOM | X           | Y           | Z           |
|------|-------------|-------------|-------------|
| C    | 0.56416400  | -2.48350900 | 3.28046100  |
| C    | 0.04447000  | -1.51277400 | 2.39896800  |
| C    | -0.73533800 | -1.94112900 | 1.30695300  |
| C    | -1.01396100 | -3.30554200 | 1.13366000  |
| C    | -0.51348600 | -4.24141900 | 2.03506100  |
| C    | 0.28604500  | -3.84101100 | 3.10122700  |
| C    | 0.22028000  | -0.07633700 | 2.77541000  |
| C    | 1.00089700  | 0.85644800  | 2.06495900  |
| C    | -0.43576700 | 0.34840500  | 3.96021500  |
| C    | 1.13014400  | 2.16976300  | 2.54924800  |
| C    | -0.32763700 | 1.66566800  | 4.41028300  |
| C    | 0.46832700  | 2.56432400  | 3.70518800  |
| P    | -1.47002100 | -0.68010600 | 0.18316600  |
| P    | 1.72613800  | 0.43927900  | 0.40589800  |
| C    | -2.62200900 | 0.20926000  | 1.28644100  |
| C    | -2.79345000 | 1.59034500  | 1.24717300  |
| C    | -3.37116300 | -0.55337400 | 2.19287000  |
| C    | -3.68144500 | 2.23265600  | 2.12311900  |
| C    | -4.29515700 | 0.04144400  | 3.04873000  |
| C    | -4.45371200 | 1.45174400  | 3.01166600  |
| C    | -2.52205100 | -1.59771700 | -0.98945600 |
| C    | -3.88178000 | -1.30673600 | -1.09670100 |
| C    | -1.93966000 | -2.47962200 | -1.91036100 |
| C    | -4.67703400 | -1.88507600 | -2.09225000 |
| C    | -2.70941000 | -3.11262000 | -2.88906400 |
| C    | -4.09376600 | -2.81170200 | -2.98353900 |
| C    | 2.60712200  | -1.14490800 | 0.63265600  |
| C    | 2.42124300  | -2.22188300 | -0.24606400 |
| C    | 3.46921700  | -1.28488200 | 1.72365000  |
| C    | 3.04648400  | -3.45241900 | -0.01361100 |
| C    | 4.17019900  | -2.47446200 | 1.94646400  |
| C    | 3.91451900  | -3.57790600 | 1.10326600  |
| C    | 2.99820100  | 1.73328400  | 0.12392000  |
| C    | 4.37131500  | 1.48209000  | 0.12025000  |
| C    | 2.55642700  | 3.02456900  | -0.19591200 |
| C    | 5.29604100  | 2.48237700  | -0.21792800 |
| C    | 3.44116800  | 4.05946000  | -0.49141200 |
| C    | 4.83302900  | 3.78852300  | -0.50295200 |
| H    | -1.64005300 | -3.63889100 | 0.31594000  |

|   |             |             |             |   |             |             |             |
|---|-------------|-------------|-------------|---|-------------|-------------|-------------|
| H | -0.74120000 | -5.29414400 | 1.89911400  | H | 1.80041700  | 6.43142200  | -2.43502200 |
| H | 1.75687600  | 2.88747300  | 2.03922900  | H | 2.76432700  | 5.04425900  | -2.97621200 |
| H | 0.57490800  | 3.58371900  | 4.06471600  | C | 1.97438700  | 5.97055400  | 0.30376400  |
| H | -2.23128300 | 2.18211700  | 0.53476300  | H | 1.07557500  | 5.35309100  | 0.43277100  |
| H | -3.22603200 | -1.62608700 | 2.22462300  | H | 2.50314400  | 5.99540500  | 1.26303200  |
| H | -4.32925400 | -0.59621000 | -0.41221800 | H | 1.64268800  | 6.98930200  | 0.07255900  |
| H | -0.87491500 | -2.69664900 | -1.84996500 | C | -2.04815900 | -4.11326400 | -3.82575400 |
| H | 1.76115700  | -2.10217000 | -1.10007700 | H | -2.82832600 | -4.47516700 | -4.49995700 |
| H | 3.60310100  | -0.45297300 | 2.40903900  | C | -1.48834300 | -5.31937200 | -3.04850300 |
| H | 4.73325200  | 0.48404500  | 0.33818000  | H | -0.68871800 | -5.02055500 | -2.36018500 |
| H | 1.49092400  | 3.23067900  | -0.21667000 | H | -2.27288000 | -5.80891400 | -2.46064200 |
| N | 5.70688700  | 4.87373900  | -0.82153000 | H | -1.06917100 | -6.05986700 | -3.73951200 |
| C | 6.66602300  | 5.31975600  | 0.17787200  | C | -0.94949600 | -3.44569500 | -4.67048900 |
| H | 6.22245900  | 5.22394000  | 1.17319200  | H | -0.51612800 | -4.16298900 | -5.37724400 |
| H | 7.62456000  | 4.77390000  | 0.17616500  | H | -1.34618700 | -2.59862600 | -5.24248000 |
| H | 6.89074900  | 6.38042500  | 0.00833000  | H | -0.13874200 | -3.07451100 | -4.03486500 |
| C | 6.13723900  | 4.98174300  | -2.20696600 | C | -6.13051100 | -1.43366200 | -2.18445400 |
| H | 5.28617800  | 4.79897300  | -2.87079400 | H | -6.61204900 | -1.97324100 | -3.00069800 |
| H | 6.50346600  | 5.99784500  | -2.39629300 | C | -6.91020400 | -1.75737900 | -0.89611300 |
| H | 6.94140500  | 4.27570300  | -2.48286100 | H | -6.50241000 | -1.21712300 | -0.03347700 |
| N | 4.49138700  | -4.86710300 | 1.33408100  | H | -7.96151400 | -1.46688500 | -1.00224400 |
| N | -4.83982200 | -3.47359200 | -4.01146100 | H | -6.87257000 | -2.82878400 | -0.66983500 |
| N | -5.42410100 | 2.01478400  | 3.90667500  | C | -6.21081900 | 0.06877400  | -2.52354000 |
| C | 4.17906000  | -5.55179900 | 2.57765400  | H | -5.77013500 | 0.68358000  | -1.72997200 |
| H | 4.23842500  | -6.63609900 | 2.41622500  | H | -5.67234000 | 0.29010500  | -3.45179000 |
| H | 4.84629800  | -5.30617400 | 3.42168600  | H | -7.25552700 | 0.37637400  | -2.64774700 |
| H | 3.15388900  | -5.30833500 | 2.87360000  | H | 0.67805400  | -4.57675400 | 3.79422600  |
| C | 5.82395300  | -5.10297900 | 0.80085800  | H | -0.84604600 | 1.99330900  | 5.30252200  |
| H | 5.89700900  | -4.67810100 | -0.20547800 | O | -1.16325600 | -0.60106400 | 4.61028800  |
| H | 6.63524600  | -4.66790800 | 1.41205200  | O | 1.32438900  | -2.01315100 | 4.30829700  |
| H | 6.00201500  | -6.18292000 | 0.72844000  | C | -1.78706500 | -0.25361600 | 5.83949600  |
| C | -5.16323600 | -2.68868300 | -5.19353100 | H | -2.56296400 | 0.50553600  | 5.68679900  |
| H | -5.42479400 | -3.36564600 | -6.01581300 | H | -2.25087700 | -1.16880200 | 6.20848600  |
| H | -6.00231600 | -1.98329600 | -5.05815800 | H | -1.05529800 | 0.10645000  | 6.57359600  |
| H | -4.28403300 | -2.11061500 | -5.49610400 | C | 1.26656600  | -2.71485700 | 5.54678500  |
| C | -5.83880800 | -4.44615300 | -3.59464100 | H | 1.80816800  | -3.66741400 | 5.50832700  |
| H | -6.79590300 | -4.01250000 | -3.25561600 | H | 1.75101900  | -2.06758100 | 6.27985800  |
| H | -6.05781900 | -5.11607200 | -4.43512900 | H | 0.22505800  | -2.89547800 | 5.83772500  |
| H | -5.43449500 | -5.05113700 | -2.77708600 | C | 5.20024000  | -2.52236100 | 3.07125100  |
| C | -4.91735100 | 2.58607500  | 5.14305000  | H | 5.75156800  | -3.46029100 | 2.98575300  |
| H | -4.41382000 | 3.56219500  | 5.01981500  | C | 6.23249800  | -1.38857500 | 2.92921100  |
| H | -5.74841600 | 2.72429000  | 5.84505900  | H | 5.77415500  | -0.40499300 | 3.08289800  |
| H | -4.20231700 | 1.89607900  | 5.60302600  | H | 7.02672100  | -1.50042000 | 3.67584800  |
| C | -6.57495300 | 2.70350200  | 3.33800900  | H | 6.69471400  | -1.39619100 | 1.93572700  |
| H | -6.86789800 | 2.21182200  | 2.40613400  | C | 4.54095200  | -2.49094600 | 4.46052500  |
| H | -7.41706100 | 2.63269000  | 4.03859600  | H | 3.92674700  | -1.59336100 | 4.58598700  |
| H | -6.41152400 | 3.77217800  | 3.12114000  | H | 3.88970300  | -3.35817600 | 4.60060000  |
| C | 6.77468500  | 2.11353700  | -0.28835600 | H | 5.30350400  | -2.50397700 | 5.24782200  |
| H | 7.31040400  | 2.95002400  | -0.73986800 | C | 2.76295400  | -4.68316300 | -0.87544100 |
| C | 7.02163100  | 0.89399000  | -1.19683100 | H | 3.65511500  | -5.31287300 | -0.83858900 |
| H | 6.55114300  | -0.01481900 | -0.80402900 | C | 1.61450100  | -5.50695200 | -0.26443400 |
| H | 6.62917800  | 1.07154900  | -2.20469200 | H | 0.67388200  | -4.95041500 | -0.31686200 |
| H | 8.09635200  | 0.69853200  | -1.28131700 | H | 1.48759900  | -6.44818000 | -0.81204200 |
| C | 7.35804200  | 1.88605900  | 1.11827100  | H | 1.80801400  | -5.74139100 | 0.78617400  |
| H | 8.42820000  | 1.65672600  | 1.06066200  | C | 2.47152400  | -4.38353300 | -2.34817200 |
| H | 7.23199700  | 2.77257000  | 1.74856900  | H | 1.58958100  | -3.74629800 | -2.47723100 |
| H | 6.86033800  | 1.04714200  | 1.61490500  | H | 3.31772400  | -3.89930200 | -2.83746100 |
| C | 2.88096100  | 5.43623600  | -0.82052000 | H | 2.26929600  | -5.31963900 | -2.88104600 |
| H | 3.73726200  | 6.10934900  | -0.91515100 | C | -5.14725400 | -0.81952900 | 3.97630800  |
| C | 2.12967300  | 5.42126100  | -2.16636200 | H | -5.25487800 | -0.27623400 | 4.92145900  |
| H | 1.23527900  | 4.78771800  | -2.11766700 | C | -4.53258000 | -2.19673100 | 4.27904200  |

|    |             |             |             |   |             |             |             |
|----|-------------|-------------|-------------|---|-------------|-------------|-------------|
| H  | -4.59344900 | -2.86501500 | 3.41133700  | C | 7.50188300  | -0.46528700 | -2.15487400 |
| H  | -3.47846100 | -2.12560500 | 4.56476000  | C | 5.79592000  | 0.66514700  | 1.02723100  |
| H  | -5.08375800 | -2.67841800 | 5.09383800  | C | 4.77608900  | 1.62375400  | 1.20254800  |
| C  | -6.56248100 | -0.99986100 | 3.38977000  | C | 6.71010000  | 0.44114400  | 2.08541900  |
| H  | -6.51264700 | -1.51755700 | 2.42375400  | C | 4.70763700  | 2.34322000  | 2.40881000  |
| H  | -7.18399800 | -1.60166800 | 4.06321900  | C | 6.61270000  | 1.14481600  | 3.28653600  |
| H  | -7.05615600 | -0.03698100 | 3.24034600  | C | 5.61361300  | 2.10437600  | 3.43317400  |
| C  | -3.79076300 | 3.75232000  | 2.06130900  | P | 3.50052400  | -1.40846100 | 0.06466000  |
| H  | -4.36248300 | 4.08879900  | 2.92797900  | P | 3.37664200  | 1.82009200  | -0.01589400 |
| C  | -2.41324800 | 4.43581400  | 2.15156600  | C | 4.00195800  | -1.82207400 | 1.78497300  |
| H  | -1.79038800 | 4.21326500  | 1.27935400  | C | 3.21719000  | -1.31900900 | 2.81914300  |
| H  | -2.53695600 | 5.52401400  | 2.19577000  | C | 5.14415100  | -2.56713700 | 2.09771800  |
| H  | -1.86953200 | 4.10979100  | 3.04416400  | C | 3.56863100  | -1.49940200 | 4.16116400  |
| C  | -4.54981100 | 4.19006600  | 0.79447900  | C | 5.48974300  | -2.84111000 | 3.42121600  |
| H  | -4.02650700 | 3.86207100  | -0.10718600 | C | 4.70344100  | -2.28140800 | 4.46377700  |
| H  | -5.55878900 | 3.76510200  | 0.77164700  | C | 3.04445000  | -3.02388800 | -0.70868800 |
| H  | -4.63663200 | 5.28148800  | 0.75183100  | C | 3.57380500  | -4.23931400 | -0.27201800 |
| Rh | -0.01311200 | 0.59418100  | -1.17259200 | C | 2.16986000  | -3.03098800 | -1.79904100 |
| C  | 2.30166500  | -1.71642600 | -4.42376500 | C | 3.28512300  | -5.44545800 | -0.91829200 |
| C  | 1.49795500  | -0.67068700 | -3.97168700 | C | 1.82223800  | -4.21845000 | -2.45045300 |
| C  | 2.05323600  | 0.41071100  | -3.25627400 | C | 2.41945800  | -5.43257400 | -2.03546500 |
| C  | 3.43519800  | 0.39170900  | -2.97898500 | C | 4.14123600  | 2.03777500  | -1.67564300 |
| C  | 4.24061300  | -0.65568500 | -3.40889900 | C | 3.48276800  | 1.41531400  | -2.73940900 |
| C  | 3.66021900  | -1.68837700 | -4.13776500 | C | 5.28206200  | 2.80117800  | -1.93672100 |
| H  | 1.89248400  | -2.54700600 | -4.98682600 | C | 3.95052100  | 1.51516000  | -4.04962800 |
| H  | 0.43550300  | -0.68666400 | -4.19984100 | C | 5.75506800  | 2.97018900  | -3.24491000 |
| H  | 3.88216800  | 1.22057800  | -2.44264900 | C | 5.10421400  | 2.29201700  | -4.30186000 |
| H  | 5.30511400  | -0.67682600 | -3.20328100 | C | 2.72201100  | 3.49880400  | 0.40111900  |
| F  | 4.43757100  | -2.71004400 | -4.55359500 | C | 3.08049700  | 4.65325900  | -0.29761900 |
| C  | 1.24441600  | 1.57716400  | -2.85188400 | C | 1.83298000  | 3.62092000  | 1.47519000  |
| C  | 0.17419900  | 2.01680900  | -3.64431500 | C | 2.59512900  | 5.91518800  | 0.06736600  |
| C  | -2.45090400 | 3.18573300  | -2.32826000 | C | 1.32673100  | 4.85949700  | 1.87555200  |
| C  | -3.61183500 | 3.72635300  | -2.89854600 | C | 1.73367900  | 6.02395200  | 1.18209000  |
| C  | -3.90136000 | 5.08378300  | -2.74513400 | H | 4.75659100  | -2.44209100 | -2.37416700 |
| C  | -3.03709200 | 5.91809500  | -2.03183100 | H | 6.82868800  | -1.91747300 | -3.59222800 |
| C  | -1.88349000 | 5.38119400  | -1.45958400 | H | 3.94013500  | 3.09164000  | 2.55373600  |
| C  | -1.59542200 | 4.02148900  | -1.59851700 | H | 5.54168100  | 2.66732800  | 4.36015600  |
| H  | -4.28614200 | 3.09101900  | -3.46598000 | H | 2.34181700  | -0.73193100 | 2.55515100  |
| H  | -4.80504000 | 5.48955300  | -3.19135000 | H | 5.78163000  | -2.91040700 | 1.29246000  |
| H  | -3.26472900 | 6.97381400  | -1.91883000 | H | 4.22620000  | -4.25990600 | 0.59079600  |
| H  | -1.20450900 | 6.01297500  | -0.89318900 | H | 1.72384400  | -2.09648600 | -2.12125600 |
| H  | -0.70059100 | 3.61518300  | -1.13977700 | H | 2.60817600  | 0.81369200  | -2.50905700 |
| Se | -2.09882500 | 1.28082700  | -2.65338500 | H | 5.81377200  | 3.26677000  | -1.11105300 |
| H  | -0.36008400 | 1.80298800  | -0.32259000 | H | 3.74392700  | 4.57796800  | -1.15006600 |
| H  | -0.05890600 | 1.52515200  | -4.58219700 | H | 1.52184300  | 2.72762300  | 2.00475700  |
| H  | 1.76217100  | 2.34133300  | -2.28297300 | N | 1.24423800  | 7.28402100  | 1.66437900  |
| H  | -0.16398200 | 3.04215000  | -3.55502800 | C | 2.18739700  | 8.22333000  | 2.23734800  |
|    |             |             |             | H | 2.97051800  | 7.67377500  | 2.76814600  |
|    |             |             |             | H | 2.67604200  | 8.89041500  | 1.50342300  |
|    |             |             |             | H | 1.66830900  | 8.86284800  | 2.96533900  |
|    |             |             |             | C | 0.10967300  | 7.87220600  | 0.98496200  |
|    |             |             |             | H | -0.55907000 | 7.07790200  | 0.64515900  |
|    |             |             |             | H | -0.44851600 | 8.51864300  | 1.67711800  |
|    |             |             |             | H | 0.37883100  | 8.48460500  | 0.10368800  |
|    |             |             |             | N | 5.58143700  | 2.32837800  | -5.65560700 |
|    |             |             |             | N | 2.11680100  | -6.61264200 | -2.79603500 |
|    |             |             |             | N | 5.15210300  | -2.51986100 | 5.81001200  |
|    |             |             |             | C | 6.87649100  | 1.74013100  | -5.94177200 |
|    |             |             |             | H | 6.89727900  | 1.39235000  | -6.98411200 |
|    |             |             |             | H | 7.73613400  | 2.42121600  | -5.80405700 |
|    |             |             |             | H | 7.02673900  | 0.87369600  | -5.29043000 |

#### 40

B3LYP-D3 SCF energy: -8699.791945 a.u.

B3LYP-D3 enthalpy: -8696.456531 a.u.

B3LYP-D3 free energy: -8696.859314 a.u.

M06 SCF energy in solution: -8698.113949 a.u.

#### Cartesian coordinates

| ATOM | X          | Y           | Z           |
|------|------------|-------------|-------------|
| C    | 7.20054500 | 0.19000000  | -0.96025300 |
| C    | 6.01301300 | -0.08337600 | -0.24997300 |
| C    | 5.12332900 | -1.04802900 | -0.76706500 |
| C    | 5.43324500 | -1.69848000 | -1.97215000 |
| C    | 6.60797700 | -1.40696700 | -2.65862300 |

|   |             |             |             |    |             |             |             |
|---|-------------|-------------|-------------|----|-------------|-------------|-------------|
| C | 5.21281700  | 3.47857200  | -6.45881000 | H  | 7.30385500  | 0.95988700  | 4.09954000  |
| H | 4.16355200  | 3.72966400  | -6.27224300 | O  | 7.68223900  | -0.49469000 | 1.85575800  |
| H | 5.81715300  | 4.38460000  | -6.26253300 | O  | 8.02063900  | 1.15053500  | -0.42615600 |
| H | 5.32063500  | 3.23238000  | -7.52363400 | C  | 8.72544900  | -0.61947200 | 2.80709000  |
| C | 1.13526200  | -7.52850300 | -2.25353500 | H  | 8.35910100  | -1.02745200 | 3.75882200  |
| H | 0.70600300  | -8.13406700 | -3.06365600 | H  | 9.44335400  | -1.31993000 | 2.37662600  |
| H | 1.53257300  | -8.22535800 | -1.49151000 | H  | 9.22099200  | 0.34362100  | 2.98904600  |
| H | 0.32649000  | -6.95764500 | -1.79078400 | C  | 9.42104800  | 0.95019100  | -0.54996500 |
| C | 3.18458700  | -7.21587800 | -3.56991900 | H  | 9.78477800  | 1.18252700  | -1.55909800 |
| H | 3.83601300  | -7.90538500 | -3.00196500 | H  | 9.88864900  | 1.63999400  | 0.15703400  |
| H | 2.75151500  | -7.78601600 | -4.40349300 | H  | 9.69044000  | -0.08151600 | -0.29203000 |
| H | 3.81543500  | -6.42731100 | -3.99153500 | C  | 6.95603100  | 3.87995000  | -3.48848100 |
| C | 5.91919300  | -1.44377000 | 6.41335800  | H  | 7.07404400  | 4.00644700  | -4.56638800 |
| H | 5.30634200  | -0.58917700 | 6.75603000  | C  | 6.73657700  | 5.28473400  | -2.89808700 |
| H | 6.47347200  | -1.82824700 | 7.27984900  | H  | 6.67635200  | 5.25474200  | -1.80456400 |
| H | 6.64115300  | -1.06031300 | 5.68470400  | H  | 7.56937800  | 5.94714700  | -3.16369000 |
| C | 4.27037400  | -3.22927500 | 6.72316800  | H  | 5.80974300  | 5.73284200  | -3.27242100 |
| H | 3.70688000  | -3.98463600 | 6.16797900  | C  | 8.25472000  | 3.26094600  | -2.94322600 |
| H | 4.87426100  | -3.74408800 | 7.48357100  | H  | 8.18417800  | 3.10982900  | -1.86244800 |
| H | 3.54372500  | -2.59107300 | 7.25483300  | H  | 8.44382100  | 2.28385200  | -3.40089000 |
| C | 3.04813300  | 7.13046700  | -0.73757300 | H  | 9.11309500  | 3.91184100  | -3.15148700 |
| H | 2.43222300  | 7.98412400  | -0.44396300 | C  | 3.27193500  | 0.72031400  | -5.15899400 |
| C | 2.85514700  | 6.93971100  | -2.25411300 | H  | 3.52401600  | 1.19953500  | -6.10952800 |
| H | 3.48572600  | 6.13482500  | -2.64718900 | C  | 3.85465100  | -0.70643500 | -5.19673400 |
| H | 1.81754600  | 6.69223100  | -2.49779500 | H  | 3.64808500  | -1.23155900 | -4.25773800 |
| H | 3.12315400  | 7.85994600  | -2.78727700 | H  | 3.41207700  | -1.28710800 | -6.01521700 |
| C | 4.51562100  | 7.47806700  | -0.41925000 | H  | 4.94108600  | -0.68163600 | -5.33466200 |
| H | 4.83559900  | 8.37039600  | -0.97152200 | C  | 1.74050000  | 0.67986100  | -5.03423300 |
| H | 4.65712000  | 7.66649000  | 0.65012800  | H  | 1.40983500  | 0.14801900  | -4.13503700 |
| H | 5.17574100  | 6.65132000  | -0.70314100 | H  | 1.31434200  | 1.68644400  | -4.99337000 |
| C | 0.33311500  | 4.91731700  | 3.02827200  | H  | 1.30643200  | 0.15770000  | -5.89468300 |
| H | 0.13583000  | 5.97538700  | 3.22398300  | C  | 6.68152900  | -3.74398500 | 3.73833600  |
| C | -0.99625700 | 4.23969800  | 2.63941500  | H  | 7.25993200  | -3.26524000 | 4.53852300  |
| H | -0.85733000 | 3.17711100  | 2.41954100  | C  | 7.61953300  | -3.97861600 | 2.54229800  |
| H | -1.72949800 | 4.32525300  | 3.45119600  | H  | 7.14824400  | -4.62188100 | 1.78806500  |
| H | -1.42761500 | 4.69296800  | 1.74030600  | H  | 7.90340700  | -3.04632000 | 2.04817600  |
| C | 0.91825900  | 4.30423800  | 4.31349200  | H  | 8.52946200  | -4.48922400 | 2.87806100  |
| H | 1.12265200  | 3.23410300  | 4.19693200  | C  | 6.20491300  | -5.10991300 | 4.27478900  |
| H | 1.85681400  | 4.79712500  | 4.59434800  | H  | 5.59306100  | -5.62194900 | 3.52218200  |
| H | 0.21290800  | 4.41341300  | 5.14595500  | H  | 7.06363500  | -5.75326600 | 4.50462400  |
| C | 0.76851100  | -4.18068800 | -3.54860500 | H  | 5.61065700  | -4.99710600 | 5.18283400  |
| H | 0.67816200  | -5.19922600 | -3.93712000 | C  | 2.69338500  | -0.83259900 | 5.22003500  |
| C | 1.18080100  | -3.26890300 | -4.71642600 | H  | 3.20422500  | -0.89299700 | 6.18334800  |
| H | 1.25441600  | -2.22197300 | -4.40474500 | C  | 2.46822300  | 0.66391600  | 4.92961700  |
| H | 2.15336800  | -3.56353300 | -5.12755200 | H  | 1.89393600  | 0.81620100  | 4.00904300  |
| H | 0.43961100  | -3.32011700 | -5.52333400 | H  | 1.90518600  | 1.12738200  | 5.74836700  |
| C | -0.59510200 | -3.75840900 | -2.96399800 | H  | 3.41909400  | 1.19149300  | 4.81409500  |
| H | -1.37908900 | -3.80739600 | -3.72995000 | C  | 1.34426100  | -1.56373500 | 5.34951100  |
| H | -0.89134700 | -4.40685200 | -2.13327200 | H  | 0.78884700  | -1.51862300 | 4.40647700  |
| H | -0.56772100 | -2.73684900 | -2.57075900 | H  | 1.48276000  | -2.62019600 | 5.60094100  |
| C | 3.95652900  | -6.71513300 | -0.40145800 | H  | 0.72326300  | -1.10206500 | 6.12679100  |
| H | 3.51497300  | -7.57359900 | -0.91280100 | Rh | 1.86705700  | 0.14399400  | 0.04051300  |
| C | 5.46392900  | -6.70039100 | -0.72484300 | Cl | -0.11519700 | 1.61274600  | 0.13291200  |
| H | 5.95956600  | -5.86311000 | -0.21796900 | C  | -7.20041800 | -0.18972400 | -0.95992000 |
| H | 5.94459400  | -7.62871000 | -0.39239800 | C  | -6.01280000 | 0.08349600  | -0.24971400 |
| H | 5.63874000  | -6.58809600 | -1.80030500 | C  | -5.12317500 | 1.04826800  | -0.76668300 |
| C | 3.73322200  | -6.92501500 | 1.10828200  | C  | -5.43319900 | 1.69894400  | -1.97161200 |
| H | 4.19752400  | -6.12930400 | 1.70105500  | C  | -6.60799500 | 1.40757200  | -2.65803500 |
| H | 2.66842600  | -6.94058600 | 1.35808300  | C  | -7.50187100 | 0.46581400  | -2.15438000 |
| H | 4.17529100  | -7.87629800 | 1.42842400  | C  | -5.79560800 | -0.66530000 | 1.02732300  |
| H | 8.41587600  | -0.23234200 | -2.69015000 | C  | -4.77581200 | -1.62398100 | 1.20242600  |

|   |             |             |             |   |             |             |             |
|---|-------------|-------------|-------------|---|-------------|-------------|-------------|
| C | -6.70969900 | -0.44143100 | 2.08562800  | H | -5.32123500 | -3.22987500 | -7.52423000 |
| C | -4.70729200 | -2.34364300 | 2.40856800  | C | -1.13597500 | 7.52904200  | -2.25371600 |
| C | -6.61222300 | -1.14529000 | 3.28662700  | H | -0.70753700 | 8.13468400  | -3.06420900 |
| C | -5.61315600 | -2.10490200 | 3.43305300  | H | -1.53261700 | 8.22582300  | -1.49126200 |
| P | -3.50030200 | 1.40847200  | 0.06501000  | H | -0.32671900 | 6.95822200  | -1.79176100 |
| P | -3.37646900 | -1.82014600 | -0.01616000 | C | -3.18648500 | 7.21656200  | -3.56814700 |
| C | -4.00157200 | 1.82158200  | 1.78550100  | H | -3.83683500 | 7.90665800  | -2.99969400 |
| C | -3.21673000 | 1.31820400  | 2.81946300  | H | -2.75415700 | 7.78610100  | -4.40252300 |
| C | -5.14373000 | 2.56656900  | 2.09856400  | H | -3.81821600 | 6.42809600  | -3.98860500 |
| C | -3.56804500 | 1.49823600  | 4.16156400  | C | -5.91845700 | 1.44215000  | 6.41397300  |
| C | -5.48918100 | 2.84020900  | 3.42216800  | H | -5.30563100 | 0.58744000  | 6.75639300  |
| C | -4.70280800 | 2.28019200  | 4.46449900  | H | -6.47265100 | 1.82645500  | 7.28059400  |
| C | -3.04433500 | 3.02411600  | -0.70792900 | H | -6.64048500 | 1.05891800  | 5.68526800  |
| C | -3.57374500 | 4.23940500  | -0.27096100 | C | -4.26952200 | 3.22751200  | 6.72409300  |
| C | -2.16979000 | 3.03151800  | -1.79831500 | H | -3.70601800 | 3.98296500  | 6.16903900  |
| C | -3.28532900 | 5.44570200  | -0.91710200 | H | -4.87333700 | 3.74219900  | 7.48464100  |
| C | -1.82244000 | 4.21913700  | -2.44959000 | H | -3.54287900 | 2.58915600  | 7.25558300  |
| C | -2.41995400 | 5.43308700  | -2.03449400 | C | -3.04844500 | -7.13047100 | -0.73883700 |
| C | -4.14123200 | -2.03740500 | -1.67590200 | H | -2.43251000 | -7.98418900 | -0.44541100 |
| C | -3.48279300 | -1.41467300 | -2.73953800 | C | -2.85531900 | -6.93922700 | -2.25530300 |
| C | -5.28211200 | -2.80066800 | -1.93714500 | H | -3.48592500 | -6.13427000 | -2.64819400 |
| C | -3.95065400 | -1.51408800 | -4.04975300 | H | -1.81771200 | -6.69160800 | -2.49881000 |
| C | -5.75523800 | -2.96922900 | -3.24533600 | H | -3.12321800 | -7.85932700 | -2.78875300 |
| C | -5.10444800 | -2.29074600 | -4.30212200 | C | -4.51598200 | -7.47816900 | -0.42081900 |
| C | -2.72197100 | -3.49902400 | 0.40045300  | H | -4.83584000 | -8.37038400 | -0.97333900 |
| C | -3.08062300 | -4.65334000 | -0.29842400 | H | -4.65765900 | -7.66682700 | 0.64849000  |
| C | -1.83287700 | -3.62144300 | 1.47446000  | H | -5.17607200 | -6.65138100 | -0.70464400 |
| C | -2.59550800 | -5.91541200 | 0.06644500  | C | -0.33324500 | -4.91828600 | 3.02737500  |
| C | -1.32691100 | -4.86015300 | 1.87472100  | H | -0.13613200 | -5.97640100 | 3.22299900  |
| C | -1.73422800 | -6.02449600 | 1.18126200  | C | 0.99622700  | -4.24082000 | 2.63844800  |
| H | -4.75657700 | 2.44263500  | -2.37354200 | H | 0.85741500  | -3.17817100 | 2.41884100  |
| H | -6.82878300 | 1.91826200  | -3.59152100 | H | 1.72956500  | -4.32667200 | 3.45011300  |
| H | -3.93980800 | -3.09211400 | 2.55330000  | H | 1.42738700  | -4.69394300 | 1.73917600  |
| H | -5.54117300 | -2.66797100 | 4.35996000  | C | -0.91811000 | -4.30522300 | 4.31270100  |
| H | -2.34139500 | 0.73117800  | 2.55523000  | H | -1.12246300 | -3.23507600 | 4.19619200  |
| H | -5.78127100 | 2.91006900  | 1.29345600  | H | -1.85664000 | -4.79805800 | 4.59373800  |
| H | -4.22596800 | 4.25979000  | 0.59198200  | H | -0.21260500 | -4.41445300 | 5.14503200  |
| H | -1.72366500 | 2.09712800  | -2.12070300 | C | -0.76876800 | 4.18172200  | -3.54780100 |
| H | -2.60814700 | -0.81318100 | -2.50905600 | H | -0.67844100 | 5.20038600  | -3.93600000 |
| H | -5.81381300 | -3.26647300 | -1.11158900 | C | -1.18113500 | 3.27036100  | -4.71594200 |
| H | -3.74396200 | -4.57782800 | -1.15092200 | H | -1.25479100 | 2.22334300  | -4.40459000 |
| H | -1.52157000 | -2.72827200 | 2.00413900  | H | -2.15367800 | 3.56515300  | -5.12701000 |
| N | -1.24542900 | -7.28473500 | 1.66370600  | H | -0.43993700 | 3.32177400  | -5.52282000 |
| C | -2.18911600 | -8.22406900 | 2.23574900  | C | 0.59480700  | 3.75907400  | -2.96341700 |
| H | -2.97294100 | -7.67453000 | 2.76551500  | H | 1.37885200  | 3.80833800  | -3.72931800 |
| H | -2.67678900 | -8.89135600 | 1.50136800  | H | 0.89110300  | 4.40701600  | -2.13234500 |
| H | -1.67078800 | -8.86337500 | 2.96447200  | H | 0.56731200  | 2.73730200  | -2.57069900 |
| C | -0.11029300 | -7.87299300 | 0.98528500  | C | -3.95667900 | 6.71524700  | -0.39989600 |
| H | 0.55889700  | -7.07877000 | 0.64622100  | H | -3.51496200 | 7.57385700  | -0.91087900 |
| H | 0.44711500  | -8.51962300 | 1.67787300  | C | -5.46406900 | 6.70070700  | -0.72337000 |
| H | -0.37875600 | -8.48520000 | 0.10366100  | H | -5.95975700 | 5.86332500  | -0.21671200 |
| N | -5.58184900 | -2.32661600 | -5.65581800 | H | -5.94467500 | 7.62898400  | -0.39073000 |
| N | -2.11800500 | 6.61318400  | -2.79528900 | H | -5.63883100 | 6.58867300  | -1.79886200 |
| N | -5.15134200 | 2.51834600  | 5.81083200  | C | -3.73350700 | 6.92461300  | 1.10994500  |
| C | -6.87692300 | -1.73822800 | -5.94158900 | H | -4.19798800 | 6.12877600  | 1.70240800  |
| H | -6.89783200 | -1.39001800 | -6.98378600 | H | -2.66873800 | 6.93999900  | 1.35989100  |
| H | -7.73655800 | -2.41936300 | -5.80405800 | H | -4.17554400 | 7.87583500  | 1.43033400  |
| H | -7.02709400 | -0.87206600 | -5.28986900 | H | -8.41591800 | 0.23299600  | -2.68962000 |
| C | -5.21339400 | -3.47651100 | -6.45951000 | H | -7.30329700 | -0.96046000 | 4.09972300  |
| H | -4.16414900 | -3.72780300 | -6.27309700 | O | -7.68181600 | 0.49449800  | 1.85622500  |
| H | -5.81782600 | -4.38255200 | -6.26357400 | O | -8.02048800 | -1.15032500 | -0.42592000 |



|    |             |             |             |
|----|-------------|-------------|-------------|
| C  | -8.72501500 | 0.61908400  | 2.80759900  |
| H  | -8.35864400 | 1.02682300  | 3.75942800  |
| H  | -9.44289700 | 1.31967300  | 2.37730600  |
| H  | -9.22059300 | -0.34403200 | 2.98932900  |
| C  | -9.42089900 | -0.94985200 | -0.54944200 |
| H  | -9.78481600 | -1.18180800 | -1.55859400 |
| H  | -9.88843000 | -1.63987000 | 0.15739300  |
| H  | -9.69018400 | 0.08178300  | -0.29110200 |
| C  | -6.95622700 | -3.87890700 | -3.48913700 |
| H  | -7.07431700 | -4.00503200 | -4.56707900 |
| C  | -6.73673200 | -5.28390200 | -2.89925400 |
| H  | -6.67643900 | -5.25429700 | -1.80572800 |
| H  | -7.56954600 | -5.94622600 | -3.16503800 |
| H  | -5.80991300 | -5.73186900 | -3.27380000 |
| C  | -8.25487400 | -3.26010600 | -2.94356900 |
| H  | -8.18422700 | -3.10932900 | -1.86274900 |
| H  | -8.44402000 | -2.28287100 | -3.40091400 |
| H  | -9.11326400 | -3.91093900 | -3.15195100 |
| C  | -3.27210600 | -0.71902200 | -5.15897800 |
| H  | -3.52399900 | -1.19827000 | -6.10955800 |
| C  | -3.85510700 | 0.70761600  | -5.19670400 |
| H  | -3.64862100 | 1.23276500  | -4.25770300 |
| H  | -3.41264700 | 1.28837900  | -6.01518300 |
| H  | -4.94153400 | 0.68261600  | -5.33464100 |
| C  | -1.74067800 | -0.67827000 | -5.03413300 |
| H  | -1.41016300 | -0.14629000 | -4.13497000 |
| H  | -1.31434100 | -1.68476900 | -4.99320700 |
| H  | -1.30670800 | -0.15605500 | -5.89460200 |
| C  | -6.68090800 | 3.74302700  | 3.73965200  |
| H  | -7.25933900 | 3.26399000  | 4.53965000  |
| C  | -7.61889300 | 3.97818300  | 2.54369300  |
| H  | -7.14754200 | 4.62167900  | 1.78969600  |
| H  | -7.90286000 | 3.04609600  | 2.04922900  |
| H  | -8.52878000 | 4.48875000  | 2.87963600  |
| C  | -6.20423500 | 5.10871400  | 4.27664300  |
| H  | -5.59235900 | 5.62101600  | 3.52423300  |
| H  | -7.06294000 | 5.75200400  | 4.50671600  |
| H  | -5.60998700 | 4.99553000  | 5.18464400  |
| C  | -2.69270000 | 0.83116300  | 5.22017200  |
| H  | -3.20346600 | 0.89126700  | 6.18354100  |
| C  | -2.46751500 | -0.66526200 | 4.92931000  |
| H  | -1.89326000 | -0.81724400 | 4.00866400  |
| H  | -1.90441700 | -1.12895600 | 5.74788800  |
| H  | -3.41836900 | -1.19285000 | 4.81367600  |
| C  | -1.34357900 | 1.56229800  | 5.34974300  |
| H  | -0.78827300 | 1.51749000  | 4.40663100  |
| H  | -1.48206400 | 2.61867800  | 5.60151900  |
| H  | -0.72249600 | 1.10038900  | 6.12681500  |
| Rh | -1.86685500 | -0.14407400 | 0.04041500  |
| Cl | 0.11531900  | -1.61283400 | 0.13279700  |

#### 41

B3LYP-D3 SCF energy: -4349.836568 a.u.

B3LYP-D3 enthalpy: -4348.170907 a.u.

B3LYP-D3 free energy: -4348.396376 a.u.

M06 SCF energy in solution: -4349.018822 a.u.

#### Cartesian coordinates

| ATOM | X           | Y          | Z          |
|------|-------------|------------|------------|
| C    | -0.00238800 | 1.25395300 | 3.36668700 |
| C    | 0.31753700  | 0.49682900 | 2.22174700 |

|   |             |             |             |
|---|-------------|-------------|-------------|
| C | 1.18658800  | 1.05873500  | 1.26411600  |
| C | 1.70680700  | 2.34603000  | 1.45997400  |
| C | 1.37020600  | 3.07749200  | 2.59622600  |
| C | 0.51723500  | 2.53672100  | 3.55542800  |
| C | -0.25608500 | -0.88244400 | 2.11544500  |
| C | -1.18927000 | -1.26936000 | 1.12918300  |
| C | 0.14170200  | -1.83644800 | 3.08273700  |
| C | -1.72180200 | -2.56949200 | 1.14486300  |
| C | -0.38678400 | -3.12930800 | 3.08027000  |
| C | -1.32867200 | -3.48146400 | 2.11607200  |
| P | 1.54352900  | 0.12804800  | -0.29462100 |
| P | -1.61099600 | -0.17272800 | -0.31150500 |
| C | 2.25249000  | -1.44195400 | 0.33150300  |
| C | 1.88176300  | -2.63661100 | -0.27841100 |
| C | 3.14562300  | -1.46717100 | 1.40805300  |
| C | 2.36615000  | -3.86895300 | 0.17875100  |
| C | 3.68419300  | -2.66708600 | 1.87062300  |
| C | 3.28198200  | -3.88118900 | 1.25315700  |
| C | 2.95923200  | 1.02370200  | -1.05452200 |
| C | 4.28803000  | 0.61537900  | -0.92964000 |
| C | 2.67291300  | 2.15735800  | -1.82630600 |
| C | 5.33053900  | 1.32099000  | -1.53996300 |
| C | 3.68381600  | 2.88920300  | -2.45516100 |
| C | 5.02848700  | 2.47113800  | -2.30499500 |
| C | -2.12619000 | 1.42574800  | 0.42981500  |
| C | -1.72871100 | 2.59602800  | -0.22256500 |
| C | -2.91153500 | 1.51836900  | 1.58149800  |
| C | -2.06557500 | 3.85488400  | 0.27354700  |
| C | -3.33019900 | 2.76273800  | 2.07151100  |
| C | -2.86366900 | 3.93744700  | 1.43892800  |
| C | -3.14286400 | -0.93007100 | -0.99161300 |
| C | -4.42471800 | -0.58249800 | -0.56220400 |
| C | -3.00207200 | -1.92158200 | -1.96596200 |
| C | -5.56224000 | -1.20657200 | -1.08819600 |
| C | -4.10836200 | -2.59075500 | -2.49235600 |
| C | -5.40326300 | -2.23250100 | -2.04757200 |
| H | 2.37792800  | 2.77762000  | 0.72647100  |
| H | 1.77280300  | 4.07700200  | 2.73466600  |
| H | -2.44047000 | -2.87092400 | 0.39320200  |
| H | -1.75230400 | -4.48208000 | 2.12102200  |
| H | 1.17525400  | -2.59738300 | -1.10321000 |
| H | 3.40757900  | -0.53306200 | 1.89128800  |
| H | 4.52277000  | -0.26975900 | -0.34988800 |
| H | 1.63776900  | 2.47142300  | -1.93679500 |
| H | -1.11939100 | 2.49822100  | -1.11491800 |
| H | -3.20115400 | 0.61299200  | 2.10776500  |
| H | -4.55177100 | 0.20211700  | 0.17448000  |
| H | -2.00998900 | -2.15519300 | -2.33596200 |
| N | -6.51563400 | -2.93659900 | -2.62041600 |
| C | -7.28728500 | -3.81084000 | -1.75696000 |
| H | -6.60962300 | -4.33287800 | -1.07409300 |
| H | -8.05798200 | -3.30382300 | -1.14769900 |
| H | -7.79818900 | -4.56568800 | -2.36998500 |
| C | -7.25916900 | -2.25755000 | -3.66677500 |
| H | -6.55979600 | -1.74059400 | -4.33047100 |
| H | -7.81060600 | -2.99748300 | -4.26189400 |
| H | -7.98973600 | -1.51314600 | -3.29799000 |
| N | -3.14573500 | 5.25298300  | 1.93926800  |
| N | 6.03974200  | 3.25498600  | -2.95603800 |
| N | 3.83242900  | -5.09376600 | 1.79827600  |
| C | -2.65695600 | 5.60624900  | 3.25950500  |

|   |             |             |             |    |             |             |             |
|---|-------------|-------------|-------------|----|-------------|-------------|-------------|
| H | -2.48700500 | 6.69095900  | 3.30636500  | H  | 6.65493000  | -0.68476700 | -2.92276700 |
| H | -3.33544800 | 5.34304900  | 4.09094400  | H  | 7.96932100  | -0.94730500 | -1.75608200 |
| H | -1.70043800 | 5.10372700  | 3.43332300  | H  | 0.25173700  | 3.10862800  | 4.43791400  |
| C | -4.41234600 | 5.85053700  | 1.55684400  | H  | -0.07533400 | -3.85962000 | 3.81689100  |
| H | -4.61071700 | 5.64016000  | 0.50113800  | O  | 1.06239000  | -1.41381900 | 4.00088100  |
| H | -5.27857000 | 5.48872700  | 2.14226400  | O  | -0.85714200 | 0.66836900  | 4.26043300  |
| H | -4.35723300 | 6.93982300  | 1.68369900  | C  | 1.40344200  | -2.28999800 | 5.06187100  |
| C | 6.65852100  | 2.68688500  | -4.14132700 | H  | 1.93514100  | -3.17836800 | 4.69550400  |
| H | 7.12551800  | 3.49006700  | -4.72601500 | H  | 2.06893900  | -1.72452000 | 5.71628100  |
| H | 7.43536300  | 1.92692200  | -3.93821800 | H  | 0.51609200  | -2.60222800 | 5.62854400  |
| H | 5.88717400  | 2.22038000  | -4.76202800 | C  | -0.64073500 | 0.93212900  | 5.63927500  |
| C | 6.89633000  | 4.07020900  | -2.11344600 | H  | -0.98541000 | 1.93255800  | 5.92919200  |
| H | 7.71663600  | 3.52078500  | -1.61578400 | H  | -1.22930800 | 0.19021800  | 6.18400500  |
| H | 7.35067800  | 4.86446200  | -2.72010000 | H  | 0.42064300  | 0.82182300  | 5.89369100  |
| H | 6.29035400  | 4.54469400  | -1.33492500 | C  | -4.29179700 | 2.80671400  | 3.25597600  |
| C | 2.95740400  | -5.84284800 | 2.68368900  | H  | -4.63130300 | 3.83720800  | 3.37820100  |
| H | 2.17149200  | -6.42089800 | 2.16311500  | C  | -5.54876600 | 1.95560500  | 2.99491400  |
| H | 3.55392400  | -6.54796800 | 3.27716000  | H  | -5.30570300 | 0.88921500  | 2.92885900  |
| H | 2.45920800  | -5.15198400 | 3.37212100  | H  | -6.27074200 | 2.07825900  | 3.81117900  |
| C | 4.68949400  | -5.90924000 | 0.95138400  | H  | -6.03754200 | 2.24611600  | 2.05857400  |
| H | 5.27945600  | -5.25902700 | 0.29937100  | C  | -3.60919100 | 2.37921500  | 4.56629400  |
| H | 5.38410300  | -6.48077500 | 1.58225100  | H  | -3.23480000 | 1.35418300  | 4.49257600  |
| H | 4.15402600  | -6.63081500 | 0.31050100  | H  | -2.75413100 | 3.02620000  | 4.78883200  |
| C | -6.93101400 | -0.74435800 | -0.59718300 | H  | -4.31212500 | 2.43650200  | 5.40656700  |
| H | -7.69744600 | -1.24780000 | -1.18887000 | C  | -1.51440900 | 5.11146900  | -0.39112500 |
| C | -7.13148000 | 0.76889100  | -0.80462200 | H  | -2.23857000 | 5.91698900  | -0.23453700 |
| H | -6.42541800 | 1.35712300  | -0.20780100 | C  | -0.20639900 | 5.53223200  | 0.30840600  |
| H | -6.98703600 | 1.04314300  | -1.85522500 | H  | 0.54273600  | 4.73647100  | 0.22793100  |
| H | -8.14507500 | 1.06348700  | -0.50656100 | H  | 0.20515300  | 6.44098600  | -0.14791500 |
| C | -7.15285900 | -1.13708300 | 0.87564700  | H  | -0.37702900 | 5.72544400  | 1.37221800  |
| H | -8.14892200 | -0.82800700 | 1.21549400  | C  | -1.29260800 | 4.96057600  | -1.90464800 |
| H | -7.06387800 | -2.22053000 | 1.01259600  | H  | -0.48003400 | 4.26248300  | -2.13626200 |
| H | -6.41290300 | -0.65590400 | 1.52500600  | H  | -2.19262700 | 4.59615600  | -2.41165000 |
| C | -3.88560900 | -3.64841000 | -3.56368600 | H  | -1.01893200 | 5.92865400  | -2.33966400 |
| H | -4.84197600 | -4.15754700 | -3.71502200 | C  | 4.71404700  | -2.66546000 | 2.99736700  |
| C | -3.47504300 | -2.98144600 | -4.89213500 | H  | 4.49005200  | -3.51720900 | 3.65018800  |
| H | -2.55679700 | -2.39431800 | -4.77495400 | C  | 4.69626400  | -1.38520900 | 3.84950800  |
| H | -3.31076100 | -3.73910600 | -5.66868200 | H  | 5.11708800  | -0.53303600 | 3.30126700  |
| H | -4.25484000 | -2.29652500 | -5.24404100 | H  | 3.68371200  | -1.10953600 | 4.15665400  |
| C | -2.84667400 | -4.70019200 | -3.13331700 | H  | 5.31058900  | -1.52580800 | 4.74615600  |
| H | -1.84571600 | -4.26514800 | -3.02958800 | C  | 6.13263100  | -2.88391700 | 2.43205600  |
| H | -3.11494200 | -5.15742500 | -2.17330800 | H  | 6.39350400  | -2.07830800 | 1.73391600  |
| H | -2.78002300 | -5.49653600 | -3.88427600 | H  | 6.87481000  | -2.88302600 | 3.23998700  |
| C | 3.30969400  | 4.12365900  | -3.26349900 | H  | 6.20807700  | -3.83522500 | 1.90130200  |
| H | 4.22372000  | 4.47112600  | -3.75290600 | C  | 1.89752700  | -5.13448800 | -0.53422400 |
| C | 2.81467200  | 5.24891600  | -2.33438400 | H  | 2.23770500  | -6.00127400 | 0.03524100  |
| H | 1.90306100  | 4.95294300  | -1.80311200 | C  | 0.36292000  | -5.23121200 | -0.61160600 |
| H | 3.57164100  | 5.50538300  | -1.58363500 | H  | -0.07167000 | -4.41533800 | -1.19897900 |
| H | 2.58510300  | 6.15323800  | -2.91087000 | H  | 0.06773100  | -6.17401400 | -1.08729800 |
| C | 2.26708100  | 3.80690300  | -4.35157900 | H  | -0.08256800 | -5.18906900 | 0.38623000  |
| H | 2.06923800  | 4.69936000  | -4.95716600 | C  | 2.52390700  | -5.22245600 | -1.93975200 |
| H | 2.61962000  | 3.01229200  | -5.01833800 | H  | 2.20287000  | -4.37830300 | -2.56131500 |
| H | 1.31174100  | 3.47805200  | -3.92643800 | H  | 3.61821900  | -5.20358200 | -1.88885200 |
| C | 6.75359500  | 0.81166300  | -1.32993300 | H  | 2.21860700  | -6.14766600 | -2.44311100 |
| H | 7.43843800  | 1.44884800  | -1.89148900 | Rh | -0.05035900 | 0.03263200  | -1.85206300 |
| C | 7.15994000  | 0.90161800  | 0.15399100  | Cl | -1.14636900 | 0.15093400  | -3.94285300 |
| H | 6.52249400  | 0.26484900  | 0.77932300  |    |             |             |             |
| H | 8.19731000  | 0.57342500  | 0.29092500  |    |             |             |             |
| H | 7.07245100  | 1.92869300  | 0.52576800  |    |             |             |             |
| C | 6.92723500  | -0.62305100 | -1.86343000 |    |             |             |             |
| H | 6.29880100  | -1.33439800 | -1.31496400 |    |             |             |             |
